# Supplementary material for: Untargeted metabolomics based on HS- SPME-GC-MS revealing the dynamic evolution of aroma components during cigar aging
Source: Front Plant Sci. 2025 Sep 15;16:1657415. doi: 10.3389/fpls.2025.1657415 (PMC12477199; doi:10.3389/fpls.2025.1657415)
Supplement: Supplementary file 2 [file Table2.xlsx]

## Sheet: Sheet1
Supplementary Table 2.Statistical parameters of differential volatile metabolites in G2 and G1.
Index	Compounds	Class I	Formula	CAS	VIP	P-value	Fold_Change	Log2FC	Type
WAMW1705	Isopropyl phenyl ketone	Ketone	C10H12O	611-70-1	1.63572	0.00117575	21.1222	4.40069	up
XMW0869	Neoisolongifolene, 8,9-dehydro-	Terpenoids	C15H22	67517-14-0	1.55689	4.13247e-10	18.8328	4.23518	up
NMW0264*302	2-Propenoic acid, 3-(3-hydroxyphenyl)-	Acid	C9H8O3	588-30-7	1.64555	1.07497e-05	14.678	3.87558	up
XMW0387	Dodecane, 1-iodo-	Halogenated hydrocarbons	C12H25I	4292-19-7	1.64519	7.72929e-07	8.57617	3.10033	up
GMW0266	α-isomethyl ionone	Terpenoids	C14H22O	127-51-5	1.49401	4.10521e-09	8.32007	3.0566	up
D163	dl-Camphoroquinone	Terpenoids	C10H14O2	10373-78-1	1.6442	6.6213e-06	8.12294	3.022	up
NMW0135	Thiocyanic acid, phenylmethyl ester	Sulfur compounds	C8H7NS	3012-37-1	1.63678	5.88424e-05	7.08559	2.82489	up
XMW1316	4-Methoxyformanilide	Amine	C8H9NO2	5470-34-8	1.64494	1.03123e-05	6.68681	2.74132	up
D215	Daucol	Terpenoids	C15H26O2	887-08-1	1.37102	1.69084e-08	5.77309	2.52934	up
YZMW0738	Benzenamine, 3,4-dichloro-	Amine	C6H5Cl2N	95-76-1	1.6443	7.28737e-06	5.53522	2.46864	up
NMW0212	2H-Indol-2-one, 1,3-dihydro-	Ketone	C8H7NO	59-48-3	1.64409	4.6082e-06	5.4275	2.44029	up
D99	Benzoic acid, 2-(dimethylamino)-, methyl ester	Ester	C10H13NO2	10072-05-6	1.33887	6.64517e-11	5.09981	2.35044	up
QWMW0901	2-Oxepanone, 7-hexyl-	Ketone	C12H22O2	16429-21-3	1.26443	1.72199e-10	4.95282	2.30825	up
NMW0107*238	Isoquinoline	Heterocyclic compound	C9H7N	119-65-3	1.6466	3.03586e-16	0.130711	-2.93555	down
KMW0597*061	.gamma.-Muurolene	Terpenoids	C15H24	30021-74-0	1.34187	1.02327e-11	4.70169	2.23318	up
XMW0019	Acetophenone, 4'-hydroxy-	Ketone	C8H8O2	99-93-4	1.14416	1.21993e-09	4.50382	2.17115	up
QWMW0808	Tricyclo[2.2.1.0(2,6)]heptane, 1,7-dimethyl-7-(4-methyl-3-pentenyl)-, (-)-	Terpenoids	C15H24	512-61-8	1.22492	8.095e-09	4.49857	2.16947	up
D319	.beta.-Acorenol	Terpenoids	C15H26O	28400-11-5	1.21709	3.54484e-09	4.31418	2.10909	up
GMW0369	Spiro[5.5]undec-2-ene, 3,7,7-trimethyl-11-methylene-, (-)-	Terpenoids	C15H24	18431-82-8	1.35687	1.58816e-11	4.28849	2.10047	up
KMW0297*088	trans-Linalool oxide (furanoid)	Heterocyclic compound	C10H18O2	34995-77-2	1.64385	3.34231e-18	0.499855	-1.00042	down
XMW2699*312	Naphthalene, 1,6,7-trimethyl-	Aromatics	C13H14	2245-38-7	1.63946	3.57343e-11	0.1627	-2.61972	down
WMW0230	Hinesol	Terpenoids	C15H26O	23811-08-7	1.29109	3.51989e-10	4.0689	2.02464	up
YZMW0268	1,2-Benzenediol, 4,5-dichloro-	Alcohol	C6H4Cl2O2	3428-24-8	1.30262	1.45967e-09	3.97711	1.99172	up
NMW0143	Benzenamine, 2,6-diethyl-	Amine	C10H15N	579-66-8	1.18355	0.00065006	3.89402	1.96126	up
XMW0700*060	4a,8-Dimethyl-2-(prop-1-en-2-yl)-1,2,3,4,4a,5,6,7-octahydronaphthalene	Terpenoids	C15H24	103827-22-1	1.23334	1.98902e-09	3.89171	1.9604	up
XMW0685	(2S,6R,7S,8E)-(+)-2,7-Epoxy-4,8-megastigmadiene	Heterocyclic compound	C13H20O	108342-25-2	1.2077	6.19163e-06	3.88246	1.95697	up
KMW0596*059	Alloaromadendrene	Terpenoids	C15H24	25246-27-9	1.36334	1.49405e-10	3.8483	1.94422	up
D341*059	Naphthalene, decahydro-1,6-bis(methylene)-4-(1-methylethyl)-, (4.alpha.,4a.alpha.,8a.alpha.)-	Terpenoids	C15H24	30021-46-6	1.36334	1.49405e-10	3.8483	1.94422	up
KMW0560	Coumarin	Heterocyclic compound	C9H6O2	91-64-5	1.15912	0.00031971	3.81108	1.9302	up
XMW0236	Thiazole, 5-ethenyl-4-methyl-	Heterocyclic compound	C6H7NS	1759-28-0	1.21539	4.90876e-09	3.78486	1.92024	up
XMW0627	Diethyl Phthalate	Ester	C12H14O4	84-66-2	1.63283	2.3121e-05	3.72759	1.89824	up
KMW0522*146	Copaene	Terpenoids	C15H24	3856-25-5	1.19309	5.71935e-05	3.66318	1.8731	up
XMW0504*084	1H-Benzocycloheptene, 2,4a,5,6,7,8-hexahydro-3,5,5,9-tetramethyl-, (R)-	Terpenoids	C15H24	1461-03-6	1.25109	2.40773e-09	3.63573	1.86225	up
XMW0192*015	(+)-4-Carene	Terpenoids	C10H16	29050-33-7	1.5995	2.10576e-09	0.337023	-1.56908	down
D338*084	.alpha.-Cuprenene	Terpenoids	C15H24	29621-78-1	1.25109	2.40773e-09	3.63573	1.86225	up
XMW0639	1,4-Methanobenzocyclodecene, 1,2,3,4,4a,5,8,9,12,12a-decahydro-	Terpenoids	C15H22	74708-73-9	1.19047	2.25921e-08	3.63533	1.86209	up
XMW0544	Azulene, 1,2,3,3a,4,5,6,7-octahydro-1,4-dimethyl-7-(1-methylethenyl)-, [1R-(1.alpha.,3a.beta.,4.alpha.,7.beta.)]-	Terpenoids	C15H24	22567-17-5	1.59971	7.46883e-13	3.61843	1.85536	up
WMW0158	Methylparaben	Ester	C8H8O3	99-76-3	1.40132	2.08188e-11	3.58206	1.84079	up
XMW0822*056	(1R,2S,6S,7S,8S)-8-Isopropyl-1-methyl-3-methylenetricyclo[4.4.0.02,7]decane-rel-	Terpenoids	C15H24	18252-44-3	1.19035	1.66308e-08	3.53872	1.82323	up
QWMW0293*328	2,3-Dimethyl-5-isopentylpyrazine	Heterocyclic compound	C11H18N2	18450-01-6	1.52041	1.25064e-05	0.0244221	-5.35567	down
XMW0380*056	1H-Cyclopropa[a]naphthalene, 1a,2,3,5,6,7,7a,7b-octahydro-1,1,7,7a-tetramethyl-, [1aR-(1a.alpha.,7.alpha.,7a.alpha.,7b.alpha.)]-	Terpenoids	C15H24	17334-55-3	1.19035	1.66308e-08	3.53872	1.82323	up
XMW0788	Phenol, 4-methyl-2-nitro-, acetate (ester)	Ester	C9H9NO4	54646-55-8	1.62464	3.9071e-09	3.53233	1.82062	up
XMW1408	1H-Cyclopropa[a]naphthalene, 1a,2,3,3a,4,5,6,7b-octahydro-1,1,3a,7-tetramethyl-, [1aR-(1a.alpha.,3a.alpha.,7b.alpha.)]-	Terpenoids	C15H24	489-29-2	1.04721	2.01734e-07	3.51968	1.81545	up
KMW0618*064	δ-cadinene	Terpenoids	C15H24	483-76-1	1.30212	7.78076e-10	3.49151	1.80385	up
GMW0078	.beta.-Bisabolene	Terpenoids	C15H24	495-61-4	1.32187	4.23723e-10	3.49089	1.80359	up
XMW0264*152	Bicyclo[4.4.0]dec-1-ene, 2-isopropyl-5-methyl-9-methylene-	Terpenoids	C15H24	150320-52-8	1.31147	5.75658e-10	3.48964	1.80308	up
XMW0665	Muurola-4,10(14)-dien-1.beta.-ol	Terpenoids	C15H24O	257293-90-6	1.13136	5.13107e-07	3.43722	1.78124	up
D24	Benzenesulfonamide	Amine	C6H7NO2S	98-10-2	1.3051	8.23329e-10	3.43619	1.78081	up
NMW0229*271	2-Naphthalenol	Phenol	C10H8O	135-19-3	1.30749	8.00576e-10	3.43194	1.77903	up
WMW0217	2-Octenal, 2-butyl-	Aldehyde	C12H22O	13019-16-4	1.06121	6.20684e-08	3.42326	1.77537	up
KMW0198*257	.alpha.-Phellandrene	Terpenoids	C10H16	99-83-2	1.4889	5.10963e-06	0.299169	-1.74097	down
D339*137	cis-.alpha.-Bisabolene	Terpenoids	C15H24	29837-07-8	1.32016	1.08819e-09	3.41451	1.77168	up
D353*059	(S,1Z,6Z)-8-Isopropyl-1-methyl-5-methylenecyclodeca-1,6-diene	Terpenoids	C15H24	317819-80-0	1.3218	5.50829e-10	3.40748	1.7687	up
XMW0469	(1R,3aS,8aS)-7-Isopropyl-1,4-dimethyl-1,2,3,3a,6,8a-hexahydroazulene	Terpenoids	C15H24	36577-33-0	1.32927	6.08043e-10	3.37318	1.75411	up
YZMW0369*344	Benzoic acid, 2,4-dichloro-	Acid	C7H4Cl2O2	50-84-0	1.30319	1.62228e-09	3.3431	1.74119	up
WMW0004*054	Ylangene	Terpenoids	C15H24	14912-44-8	1.17511	3.99458e-08	3.33493	1.73766	up
XMW0382*054	isoledene	Terpenoids	C15H24	95910-36-4	1.17511	3.99458e-08	3.33493	1.73766	up
XMW2972	1H-Benzocycloheptene, 2,4a,5,6,7,8,9,9a-octahydro-3,5,5-trimethyl-9-methylene-, (4aS-cis)-	Terpenoids	C15H24	3853-83-6	1.31989	9.55164e-10	3.24646	1.69887	up
XMW0271	Cadina-1(10),6,8-triene	Terpenoids	C15H22	1460-96-4	1.3292	7.09024e-10	3.22899	1.69108	up
XMW0247	Benzene, 1-methyl-4-(1,2,2-trimethylcyclopentyl)-, (R)-	Terpenoids	C15H22	16982-00-6	1.28291	4.63092e-09	3.16018	1.66001	up
NMW0142*081	Cyclohexanol, 1-methyl-4-(1-methylethylidene)-, acetate	Ester	C12H20O2	10235-63-9	1.28166	1.29817e-07	3.1078	1.63589	up
KMW0516*081	.alpha.-Terpinyl acetate	Ester	C12H20O2	80-26-2	1.28166	1.29817e-07	3.1078	1.63589	up
QWMW1080	α-methyl ionone	Terpenoids	C14H22O	7779-30-8	1.34841	5.31113e-10	3.10325	1.63378	up
XMW0209	1,4-Cyclohexadiene-1-methanol, 4-(1-methylethyl)-	Alcohol	C10H16O	22539-72-6	1.34131	2.33233e-06	3.09119	1.62816	up
XMW0009*064	Naphthalene, 1,2,4a,5,8,8a-hexahydro-4,7-dimethyl-1-(1-methylethyl)-, [1S-(1.alpha.,4a.beta.,8a.alpha.)]-	Terpenoids	C15H24	523-47-7	1.32876	1.20534e-09	3.08774	1.62655	up
XMW0556*064	(2S,4aR,8aR)-4a,8-Dimethyl-2-(prop-1-en-2-yl)-1,2,3,4,4a,5,6,8a-octahydronaphthalene	Terpenoids	C15H24	123123-37-5	1.32876	1.20534e-09	3.08774	1.62655	up
KMW0572*446	trans-Cinnamic acid	Acid	C9H8O2	140-10-3	1.36658	4.76935e-10	3.08689	1.62615	up
KMW0626*065	Naphthalene, 1,2,3,4-tetrahydro-1,6-dimethyl-4-(1-methylethyl)-, (1S-cis)-	Terpenoids	C15H22	483-77-2	1.34483	6.64648e-10	3.07092	1.61867	up
WMW0021*065	trans-Calamenene	Terpenoids	C15H22	73209-42-4	1.34483	6.64648e-10	3.07092	1.61867	up
XMW0386*065	cis-Calamenene	Terpenoids	C15H22	72937-55-4	1.34483	6.64648e-10	3.07092	1.61867	up
WMW0007	Azulene, 1,2,3,5,6,7,8,8a-octahydro-1,4-dimethyl-7-(1-methylethenyl)-, [1S-(1.alpha.,7.alpha.,8a.beta.)]-	Terpenoids	C15H24	3691-11-0	1.1728	7.77411e-08	3.06717	1.61691	up
KMW0736	Apocynin	Ketone	C9H10O3	498-02-2	1.04854	6.94758e-07	3.06699	1.61682	up
XMW0047	Phenol, 2-(1-methylpropyl)-	Phenol	C10H14O	89-72-5	1.64064	6.88901e-11	0.118777	-3.07368	down
XMW0280	Carbonic acid, phenyl propyl ester	Ester	C10H12O3	13183-16-9	1.28523	1.16451e-07	3.03914	1.60366	up
w44	Butanoic acid, 2-butoxy-1-methyl-2-oxoethyl ester	Ester	C11H20O4	7492-70-8	1.57982	5.0935e-06	0.118696	-3.07466	down
XMW0167	1-(2,3,4,5-Tetramethylphenyl)ethanone	Ketone	C12H16O	34764-71-1	1.35941	4.47092e-10	3.02932	1.59899	up
KMW0509	Cyclohexene, 4-ethenyl-4-methyl-3-(1-methylethenyl)-1-(1-methylethyl)-, (3R-trans)-	Terpenoids	C15H24	20307-84-0	1.28506	5.68518e-07	3.02814	1.59843	up
XMW0979	(4R,4aS,6S)-4,4a-Dimethyl-6-(prop-1-en-2-yl)-1,2,3,4,4a,5,6,7-octahydronaphthalene	Terpenoids	C15H24	823810-22-6	1.39807	9.10133e-11	3.02461	1.59675	up
QWMW0656	4-(4,5-Dimethyl-1,3-dioxolan-2-yl)-2-methoxyphenol	Phenol	C12H16O4	63253-24-7	1.47358	0.00163282	3.02217	1.59559	up
XMW0045	(1R,4R,4aS,8aR)-4,7-Dimethyl-1-(prop-1-en-2-yl)-1,2,3,4,4a,5,6,8a-octahydronaphthalene	Terpenoids	C15H24	92692-39-2	1.47415	2.95392e-10	3.02162	1.59532	up
XMW0948*363	Valerena-4,7(11)-diene	Terpenoids	C15H24	351222-66-7	1.46997	2.94075e-11	3.01289	1.59115	up
D102	1-Pentanone, 1-phenyl-	Ketone	C11H14O	1009-14-9	1.30524	2.92507e-09	2.99445	1.58229	up
XMW0160	Megastigmatrienone	Ketone	C13H18O	38818-55-2	1.36148	4.58254e-10	2.97847	1.57457	up
YZMW0731	Azacyclotridecan-2-one	Ketone	C12H23NO	947-04-6	1.05063	0.00287399	2.94874	1.5601	up
XMW1492	Benzeneacetaldehyde, .alpha.-methyl-4-(2-methylpropyl)-	Aldehyde	C13H18O	51407-46-6	1.46384	5.79335e-12	2.94511	1.55832	up
BPMW012	2(3H)-Benzoxazolone	Ester	C7H5NO2	59-49-4	1.3829	5.84356e-10	2.92988	1.55084	up
XMW0682	Benzenemethanol, .alpha.-methyl-.alpha.-(1-methyl-2-propenyl)-	Alcohol	C12H16O	61967-11-1	1.20973	5.97182e-08	2.91798	1.54497	up
D1612	Oxiranecarboxylic acid, 3-methyl-3-phenyl-, ethyl ester	Aldehyde	C12H14O3	77-83-8	1.348	1.35929e-09	2.87758	1.52486	up
NMW0277	(S)-4-(1-Acetoxyallyl)phenyl acetate	Ester	C13H14O4	52946-22-2	1.47184	0.00104735	2.87371	1.52292	up
WMW0218	Butylated Hydroxytoluene	Phenol	C15H24O	128-37-0	1.34116	1.36313e-09	2.87166	1.52189	up
XMW0552	2,2'-Isopropylidenebis(5-methylfuran)	Heterocyclic compound	C13H16O2	59212-75-8	1.25939	1.74816e-08	2.8684	1.52024	up
D767	Benzenepropanal, 4-(1,1-dimethylethyl)-	Aldehyde	C13H18O	18127-01-0	1.34695	1.19317e-09	2.86434	1.5182	up
NMW0227*137	(Z)-1-Methyl-4-(6-methylhept-5-en-2-ylidene)cyclohex-1-ene	Terpenoids	C15H24	13062-00-5	1.35316	1.32945e-09	2.85747	1.51474	up
XMW3388	Pyridine, 2-propyl-	Heterocyclic compound	C8H11N	622-39-9	1.60751	3.25733e-11	0.434535	-1.20246	down
XMW0975*137	Cyclohexene, 4-(1,5-dimethyl-1,4-hexadienyl)-1-methyl-	Terpenoids	C15H24	17627-44-0	1.35316	1.32945e-09	2.85747	1.51474	up
XMW1433	2,6-Heptanedione, 3-acetyl-	Ketone	C9H14O3	29214-57-1	1.64341	1.47574e-11	0.0846442	-3.56244	down
XMW0143*108	1H-3a,7-Methanoazulene, 2,3,4,7,8,8a-hexahydro-3,6,8,8-tetramethyl-, [3R-(3.alpha.,3a.beta.,7.beta.,8a.alpha.)]-	Terpenoids	C15H24	469-61-4	1.33438	2.58171e-09	2.85342	1.51269	up
KMW0556*369	Naphthalene, decahydro-4a-methyl-1-methylene-7-(1-methylethenyl)-, [4aR-(4a.alpha.,7.alpha.,8a.beta.)]-	Terpenoids	C15H24	17066-67-0	1.37696	1.54427e-09	2.8531	1.51253	up
D300*369	Aristolochene	Terpenoids	C15H24	26620-71-3	1.37696	1.54427e-09	2.8531	1.51253	up
XMW1195	Butanoic acid, 3-methyl-3-nitroso-, methyl ester	Ester	C6H11NO3	49680-44-6	1.64389	1.33344e-11	0.112632	-3.15031	down
KMW0616*152	Naphthalene, 1,2,3,4,4a,5,6,8a-octahydro-7-methyl-4-methylene-1-(1-methylethyl)-, (1.alpha.,4a.beta.,8a.alpha.)-	Terpenoids	C15H24	39029-41-9	1.33729	1.64888e-09	2.85098	1.51146	up
YZMW0293	2-Hydroxy-2-methylbutyric acid	Acid	C5H10O3	3739-30-8	1.64459	3.31878e-10	0.00109175	-9.83914	down
YZMW0458	Phenol, 4-(ethoxymethyl)-	Phenol	C9H12O2	57726-26-8	1.31589	6.79582e-09	2.82318	1.49732	up
GMW0223	Ethanone, 1-(3,4-dimethoxyphenyl)-	Ketone	C10H12O3	1131-62-0	1.32103	2.00204e-05	2.80496	1.48798	up
WAMW0913	2,4-Dodecadienal, (E,E)-	Aldehyde	C12H20O	21662-16-8	1.38179	4.04409e-10	2.80214	1.48653	up
XMW0262	1,1,7,7a-Tetramethyl-1a,2,6,7,7a,7b-hexahydro-1H-cyclopropa[a]naphthalene	Terpenoids	C15H22	154098-14-3	1.07732	2.89903e-06	2.78645	1.47843	up
YZMW0154	Thiophene, tetrahydro-2-methyl-	Heterocyclic compound	C5H10S	1795-09-1	1.46016	8.26233e-07	0.475246	-1.07325	down
D216	α-irone	Terpenoids	C14H22O	79-69-6	1.36795	7.63251e-10	2.769	1.46936	up
YZMW0705	Phenol, 4-chloro-5-methyl-2-(1-methylethyl)-	Phenol	C10H13ClO	89-68-9	1.33782	2.09063e-09	2.76743	1.46855	up
GMW0159	Benzenepentanol	Alcohol	C11H16O	10521-91-2	1.33864	7.1437e-10	2.7381	1.45317	up
KMW0603*061	Germacrene D	Terpenoids	C15H24	23986-74-5	1.45808	2.87743e-11	2.73047	1.44915	up
WMW0012*061	(+)-epi-Bicyclosesquiphellandrene	Terpenoids	C15H24	54274-73-6	1.45808	2.87743e-11	2.73047	1.44915	up
KMW0359*429	Phenol, 3-ethyl-	Phenol	C8H10O	620-17-7	1.35959	0.00604073	2.71543	1.44118	up
YZMW0214	Phenol, 3-methyl-4-nitro-	Phenol	C7H7NO3	2581-34-2	1.62434	3.04798e-08	0.0798925	-3.6458	down
XMW0300*429	Phenol, 3,5-dimethyl-	Phenol	C8H10O	108-68-9	1.35959	0.00604073	2.71543	1.44118	up
WAMW1443*429	Phenol, 2,3-dimethyl-	Phenol	C8H10O	526-75-0	1.35959	0.00604073	2.71543	1.44118	up
QWMW1206*429	Phenol, 3,4-dimethyl-	Phenol	C8H10O	95-65-8	1.35959	0.00604073	2.71543	1.44118	up
KMW0660	2(3H)-Furanone, dihydro-5-(2-octenyl)-, (Z)-	Ester	C12H20O2	18679-18-0	1.62174	3.19602e-08	0.148716	-2.74937	down
XMW1485	Pentanoic acid, 5-hydroxy-, 2,4-di-t-butylphenyl esters	Ester	C19H30O3	166273-38-7	1.12217	3.56603e-05	2.67709	1.42066	up
KMW0210*362	1H-Cyclopenta[1,3]cyclopropa[1,2]benzene, octahydro-7-methyl-3-methylene-4-(1-methylethyl)-, [3aS-(3a.alpha.,3b.beta.,4.beta.,7.alpha.,7aS*)]-	Terpenoids	C15H24	13744-15-5	1.33987	1.01628e-08	2.67274	1.41832	up
YZMW0195*416	Benzoic acid, 2-amino-4-methyl-	Acid	C8H9NO2	2305-36-4	1.308	4.3969e-09	2.67218	1.41802	up
YZMW0229*416	2-Amino-5-methylbenzoic acid	Acid	C8H9NO2	2941-78-8	1.308	4.3969e-09	2.67218	1.41802	up
D74	4-Acetylanisole	Ketone	C9H10O2	100-06-1	1.14635	5.07623e-06	2.66816	1.41585	up
XMW0388	Selina-3,7(11)-diene	Terpenoids	C15H24	6813-21-4	1.32842	3.97924e-09	2.66447	1.41385	up
D227	Phenol, (1,1-dimethylethyl)-4-methoxy- (CAS)	Phenol	C11H16O2	25013-16-5	1.62353	4.36727e-09	0.141149	-2.8247	down
XMW1334	Benzene, (2,2-diethoxyethyl)-	Ether	C12H18O2	6314-97-2	1.06465	3.89609e-05	2.66393	1.41356	up
WMW0223*365	Cedrene	Terpenoids	C15H24	11028-42-5	1.47798	6.477e-09	2.66096	1.41195	up
YZMW0707*271	1-Naphthalenol	Phenol	C10H8O	90-15-3	1.33895	3.63308e-09	2.63049	1.39533	up
WMW0008*362	Longifolene	Terpenoids	C15H24	475-20-7	1.24124	5.51284e-08	2.6278	1.39385	up
XMW1171	Benzene, 1-methoxy-4-phenoxy-	Ether	C13H12O2	1655-69-2	1.22254	8.96227e-08	2.61541	1.38704	up
KMW0679*301	2-Propenoic acid, 3-phenyl-, methyl ester, (E)-	Ester	C10H10O2	1754-62-7	1.33148	1.17571e-08	2.61421	1.38637	up
XMW1102	Vinyl trans-cinnamate	Ester	C11H10O2	17719-70-9	1.35137	3.48739e-09	2.60332	1.38035	up
GMW0254	Benzenepropanol, propanoate	Ester	C12H16O2	122-74-7	1.35542	1.88637e-09	2.59857	1.37772	up
QWMW1271	2(3H)-Furanone, dihydro-4-methyl-5-pentyl-	Ketone	C10H18O2	33673-62-0	1.08906	2.57802e-08	2.58389	1.36954	up
YZMW0242	Phenol, 3-methyl-4-(methylthio)-	Phenol	C8H10OS	3120-74-9	1.0108	1.34677e-08	2.5813	1.3681	up
YZMW0225	4-n-Propylacetophenone	Ketone	C11H14O	2932-65-2	1.31438	9.17825e-09	2.55503	1.35334	up
XMW1182*054	Di-epi-.alpha.-cedrene-(I)	Terpenoids	C15H24	21996-77-0	1.31658	8.781e-09	2.55429	1.35292	up
XMW1412*054	2-Epi-.alpha.-funebrene	Terpenoids	C15H24	65354-33-8	1.31658	8.781e-09	2.55429	1.35292	up
KMW0590*083	Naphthalene, 1,2,3,5,6,7,8,8a-octahydro-1,8a-dimethyl-7-(1-methylethenyl)-, [1R-(1.alpha.,7.beta.,8a.alpha.)]-	Terpenoids	C15H24	4630-07-3	1.54883	2.6217e-11	2.55401	1.35276	up
XMW0797*083	Naphthalene, 1,2,4a,5,6,8a-hexahydro-4,7-dimethyl-1-(1-methylethyl)-,[1R-(1.alpha.,4a.alpha.,8a.alpha.)]-	Terpenoids	C15H24	17627-24-6	1.54883	2.6217e-11	2.55401	1.35276	up
WAMW0426	1-Dodecanethiol	Alcohol	C12H26S	112-55-0	1.29509	1.7483e-06	2.54716	1.34889	up
XMW0740	3-Methyl-pyrrolo(2,3-b)pyrazine	Heterocyclic compound	C7H7N3	20321-99-7	1.43041	3.5172e-10	2.53351	1.34113	up
XMW0384	4,7-Methanoazulene, 1,2,3,4,5,6,7,8-octahydro-1,4,9,9-tetramethyl-, [1S-(1.alpha.,4.alpha.,7.alpha.)]-	Terpenoids	C15H24	514-51-2	1.29644	1.71572e-08	2.53035	1.33934	up
D1666	Cyclododecanone	Ketone	C12H22O	830-13-7	1.35243	6.1006e-09	2.5229	1.33508	up
KMW0624*381	Cis-Nerolidol	Terpenoids	C15H26O	3790-78-1	1.44439	2.4157e-10	2.52005	1.33345	up
QWMW1145	Benzenethiol, 2-methoxy-	Alcohol	C7H8OS	7217-59-6	1.63588	2.84973e-10	0.138902	-2.84786	down
WMW0043*381	Nerolidol	Terpenoids	C15H26O	142-50-7	1.44439	2.4157e-10	2.52005	1.33345	up
NMW0270	Benzophenone	Ketone	C13H10O	119-61-9	1.4728	1.2875e-10	2.51816	1.33237	up
QWMW1034	1-Nonen-3-ol	Alcohol	C9H18O	21964-44-3	1.62657	1.02282e-13	0.479857	-1.05932	down
WMW0126	1,3-Hexadiene, 3-ethyl-2-methyl-	Hydrocarbons	C9H16	61142-36-7	1.53678	2.39101e-08	0.460006	-1.12027	down
XMW2429*059	Patchoulene	Terpenoids	C15H24	1405-16-9	1.31806	9.1882e-09	2.50943	1.32736	up
XMW1256	2-Butanone, 4-(2,6,6-trimethyl-1,3-cyclohexadien-1-yl)-	Ketone	C13H20O	20483-36-7	1.46265	1.16541e-08	2.49842	1.32102	up
KMW0622	Cyclohexene, 3-(1,5-dimethyl-4-hexenyl)-6-methylene-, [S-(R*,S*)]-	Terpenoids	C15H24	20307-83-9	1.49568	1.62252e-10	2.46333	1.30061	up
XMW0392	.alpha.-Corocalene	Terpenoids	C15H20	20129-39-9	1.26048	7.46917e-08	2.45711	1.29696	up
NMW0269	Benzene, 1,1'-(1,3-propanediyl)bis-	Aromatics	C15H16	1081-75-0	1.33859	1.18162e-08	2.43141	1.28179	up
KMW0548*108	1H-Cycloprop[e]azulene, 1a,2,3,4,4a,5,6,7b-octahydro-1,1,4,7-tetramethyl-, [1aR-(1a.alpha.,4.alpha.,4a.beta.,7b.alpha.)]-	Terpenoids	C15H24	489-40-7	1.49157	7.59664e-06	2.43017	1.28105	up
XMW0629*108	3H-3a,7-Methanoazulene, 2,4,5,6,7,8-hexahydro-1,4,9,9-tetramethyl-, [3aR-(3a.alpha.,4.beta.,7.alpha.)]-	Terpenoids	C15H24	2387-78-2	1.49157	7.59664e-06	2.43017	1.28105	up
XMW0012*064	Naphthalene, 1,2,4a,5,6,8a-hexahydro-4,7-dimethyl-1-(1-methylethyl)-, [1S-(1.alpha.,4a.beta.,8a.alpha.)]-	Terpenoids	C15H24	24406-05-1	1.07288	5.88859e-08	2.41879	1.27428	up
WAMW0663	3-Dodecanone	Ketone	C12H24O	1534-27-6	1.43407	3.36647e-07	0.204126	-2.29247	down
XMW1439	Benzene, (1-nitropropyl)-	Nitrogen compounds	C9H11NO2	5279-14-1	1.41015	1.24977e-09	2.4091	1.2685	up
XMW1345	Octanoic acid, 3-methylbutyl ester	Ester	C13H26O2	2035-99-6	1.3865	3.89217e-09	2.40725	1.26738	up
KMW0599	Dodecanoic acid, methyl ester	Ester	C13H26O2	111-82-0	1.38571	1.38516e-07	2.39397	1.2594	up
QWMW1114	Neryl butyrate	Ester	C14H24O2	999-40-6	1.40182	5.79686e-10	2.3852	1.25411	up
WMW0003*364	Naphthalene, 1,2,3,5,6,7,8,8a-octahydro-1,8a-dimethyl-7-(1-methylethenyl)-, [1S-(1.alpha.,7.alpha.,8a.alpha.)]-	Terpenoids	C15H24	10219-75-7	1.04903	3.03992e-05	2.37307	1.24675	up
WAMW0914*364	1H-Cycloprop[e]azulene, 1a,2,3,5,6,7,7a,7b-octahydro-1,1,4,7-tetramethyl-, [1aR-(1a.alpha.,7.alpha.,7a.beta.,7b.alpha.)]-	Terpenoids	C15H24	21747-46-6	1.04903	3.03992e-05	2.37307	1.24675	up
XMW3348	Benzoic acid, 2-methoxy-, methyl ester	Ester	C9H10O3	606-45-1	1.13921	6.55188e-07	2.37083	1.24539	up
NMW0297	Oxirane, tetradecyl-	Heterocyclic compound	C16H32O	7320-37-8	1.62833	8.24332e-09	0.14174	-2.81868	down
XMW1476	1-Propanone, 1-(4-methoxyphenyl)-	Ketone	C10H12O2	121-97-1	1.41974	5.58721e-10	2.34699	1.23081	up
XMW0423	6,8-Nonadien-2-one, 8-methyl-5-(1-methylethyl)-, (E)-	Ketone	C13H22O	54868-48-3	1.3009	1.0411e-08	2.31823	1.21303	up
XMW0819*058	cis-Muurola-4(15),5-diene	Terpenoids	C15H24	157477-72-0	1.3749	7.2993e-09	2.30618	1.2055	up
XMW0462	2-Cyclopenten-1-one, 3-methyl-2-(2-pentenyl)-, (Z)-	Ketone	C11H16O	488-10-8	1.44935	0.000319718	2.27671	1.18695	up
NMW0231	Phenol, 2-methoxy-4-(2-propenyl)-, acetate	Ester	C12H14O3	93-28-7	1.48675	1.03494e-08	2.26707	1.18083	up
XMW0197*058	(1S,4S,4aS)-1-Isopropyl-4,7-dimethyl-1,2,3,4,4a,5-hexahydronaphthalene	Terpenoids	C15H24	267665-20-3	1.47736	7.92595e-09	2.26119	1.17708	up
GMW0003	Ethyl Vanillin	Aldehyde	C9H10O3	121-32-4	1.52087	8.17202e-11	2.25342	1.17211	up
NMW0177	N-Benzylformamide	Amine	C8H9NO	6343-54-0	1.42208	3.81108e-09	2.25233	1.17142	up
GMW0242	1,3-Benzodioxole-5-propanal, .alpha.-methyl-	Aldehyde	C11H12O3	1205-17-0	1.49437	3.08533e-09	2.23593	1.16088	up
XMW0962*110	Butanoic acid, 2-methyl-, phenylmethyl ester	Ester	C12H16O2	56423-40-6	1.37589	5.95322e-09	2.22166	1.15164	up
D147*110	Butanoic acid, 3-methyl-, phenylmethyl ester	Ester	C12H16O2	103-38-8	1.37589	5.95322e-09	2.22166	1.15164	up
XMW0463*110	Pentanoic acid, phenylmethyl ester	Ester	C12H16O2	10361-39-4	1.37589	5.95322e-09	2.22166	1.15164	up
KMW0606*061	.alpha.-Muurolene	Terpenoids	C15H24	10208-80-7	1.46633	6.73413e-10	2.20105	1.13819	up
XMW0176*061	Naphthalene, 1,2,4a,5,6,8a-hexahydro-4,7-dimethyl-1-(1-methylethyl)-, (1.alpha.,4a.alpha.,8a.alpha.)-	Terpenoids	C15H24	31983-22-9	1.46633	6.73413e-10	2.20105	1.13819	up
NMW0296	Apiol	Heterocyclic compound	C12H14O4	523-80-8	1.33581	2.69644e-07	2.18186	1.12556	up
KMW0528*355	Hexanoic acid, 3-hexenyl ester, (Z)-	Ester	C12H22O2	31501-11-8	1.5089	4.46233e-07	2.18066	1.12476	up
XMW1097*355	Hexanoic acid, 3-hexenyl ester	Ester	C12H22O2	84434-19-5	1.5089	4.46233e-07	2.18066	1.12476	up
XMW0617	Propanoic acid, 2-methyl-, 3-hydroxy-2,2,4-trimethylpentyl ester	Ester	C12H24O3	77-68-9	1.61619	2.96274e-10	2.17594	1.12164	up
XMW0728	Benzenemethanol, 4-methyl-.alpha.-(1-methyl-2-propenyl)-, (R*,R*)-	Alcohol	C12H16O	83173-76-6	1.4107	2.4488e-09	2.14829	1.10319	up
KMW0566*060	Naphthalene, decahydro-4a-methyl-1-methylene-7-(1-methylethylidene)-, (4aR-trans)-	Terpenoids	C15H24	515-17-3	1.39221	5.41188e-09	2.13411	1.09364	up
YC_926	Histamine	Amine	C5H9N3	51-45-6	1.43141	6.65627e-10	2.13345	1.09319	up
NMW0099*238	Quinoline	Heterocyclic compound	C9H7N	91-22-5	1.6466	3.03586e-16	0.130711	-2.93555	down
NMW0328	9H-Fluoren-9-one	Ketone	C13H8O	486-25-9	1.49972	0.00114516	2.13129	1.09173	up
NMW0360	9H-Fluoren-9-ol	Alcohol	C13H10O	1689-64-1	1.33021	0.00314217	2.10661	1.07492	up
NMW0176	Benzeneacetamide	Amine	C8H9NO	103-81-1	1.251	1.9661e-07	2.10092	1.07102	up
NMW0200*147	1,6,10-Dodecatriene, 7,11-dimethyl-3-methylene-	Terpenoids	C15H24	77129-48-7	1.47804	2.18147e-09	2.09532	1.06717	up
KMW0573*147	β-Farnesene	Terpenoids	C15H24	18794-84-8	1.47804	2.18147e-09	2.09532	1.06717	up
NMW0175	Phenol, 4-(1,1-dimethylpropyl)-	Phenol	C11H16O	80-46-6	1.57754	1.31561e-07	2.08491	1.05998	up
KMW0197*257	(S)-(+)-alpha-Phellandrene	Terpenoids	C10H16	2243-33-6	1.4889	5.10963e-06	0.299169	-1.74097	down
KMW0275*088	2-Furanmethanol, 5-ethenyltetrahydro-.alpha.,.alpha.,5-trimethyl-, cis-	Alcohol	C10H18O2	5989-33-3	1.64385	3.34231e-18	0.499855	-1.00042	down
NMW0230	5,6-Dihydro-5-methyluracil	Heterocyclic compound	C5H8N2O2	696-04-8	1.43985	4.30853e-10	2.06913	1.04902	up
YZMW0227	Benzaldehyde, 2,3,4,5-tetramethyl-	Aldehyde	C11H14O	29344-95-4	1.52542	2.2657e-11	2.06111	1.04342	up
XMW0107	1,2-Benzenedimethanol	Alcohol	C8H10O2	612-14-6	1.32982	7.89934e-08	2.04695	1.03348	up
YZMW0280*327	Phenol, 2,5-bis(1-methylethyl)-	Phenol	C12H18O	35946-91-9	1.43908	6.50714e-10	2.03763	1.02689	up
XMW0118	1-Naphthalenol, 5,6,7,8-tetrahydro-2,5-dimethyl-8-(1-methylethyl)-	Terpenoids	C15H22O	55012-72-1	1.6024	5.12523e-05	2.03207	1.02295	up
YZMW0320*015	Bicyclo[4.1.0]hept-2-ene, 3,7,7-trimethyl-, (1S-cis)-	Terpenoids	C10H16	4497-92-1	1.5995	2.10576e-09	0.337023	-1.56908	down
XMW0006*015	(+)-3-Carene	Terpenoids	C10H16	498-15-7	1.5995	2.10576e-09	0.337023	-1.56908	down
KMW0220*015	3-Carene	Terpenoids	C10H16	13466-78-9	1.5995	2.10576e-09	0.337023	-1.56908	down
KMW0486*328	Pyrazine, 2,5-dimethyl-3-(3-methylbutyl)-	Heterocyclic compound	C11H18N2	18433-98-2	1.52041	1.25064e-05	0.0244221	-5.35567	down
KMW0550	(E)-β-damascone	Terpenoids	C13H20O	23726-91-2	1.46281	2.5573e-09	2.02955	1.02116	up
WMW0148	Spiro[4.5]dec-7-ene, 1,8-dimethyl-4-(1-methylethenyl)-, [1S-(1.alpha.,4.beta.,5.alpha.)]-	Terpenoids	C15H24	24048-44-0	1.27906	4.71036e-08	2.00234	1.00169	up
