# Supplementary material for: Untargeted metabolomics based on HS- SPME-GC-MS revealing the dynamic evolution of aroma components during cigar aging
Source: Front Plant Sci. 2025 Sep 15;16:1657415. doi: 10.3389/fpls.2025.1657415 (PMC12477199; doi:10.3389/fpls.2025.1657415)
Supplement: Supplementary file 5 [file Table5.xlsx]

## Sheet: Sheet1
Supplementary Table 5.K-means cluster analysis results based on 538 differentially volatile metabolites
Index	Sub class	CAS	Compounds	Class I	Threshold	Odor
YZMW0214	1	2581-34-2	Phenol, 3-methyl-4-nitro-	Phenol	5	-
NMW0107*238	1	119-65-3	Isoquinoline	Heterocyclic compound	-	sweet, balsamic, herbal, benzaldehyde, anisic
XMW2699*312	1	2245-38-7	Naphthalene, 1,6,7-trimethyl-	Aromatics	9	earthy
XMW1433	1	29214-57-1	2,6-Heptanedione, 3-acetyl-	Ketone	-	-
YZMW0293	1	3739-30-8	2-Hydroxy-2-methylbutyric acid	Acid	11800	-
NMW0099*238	1	91-22-5	Quinoline	Heterocyclic compound	0.71	musty, tobacco, rubbery, earthy
KMW0297*088	1	34995-77-2	trans-Linalool oxide (furanoid)	Heterocyclic compound	0.19	flowery
XMW0192*015	1	29050-33-7	(+)-4-Carene	Terpenoids	-	-
QWMW0293*328	1	18450-01-6	2,3-Dimethyl-5-isopentylpyrazine	Heterocyclic compound	6	caramel, coffee, sweet
XMW0047	1	89-72-5	Phenol, 2-(1-methylpropyl)-	Phenol	-	-
XMW3388	1	622-39-9	Pyridine, 2-propyl-	Heterocyclic compound	0.011	green, fatty, roasted, tobacco, nutty
XMW1195	1	49680-44-6	Butanoic acid, 3-methyl-3-nitroso-, methyl ester	Ester	-	-
QWMW1145	1	7217-59-6	Benzenethiol, 2-methoxy-	Alcohol	-	meaty, smoky, sausage, powdery, sweet, spicy, phenol, sulfury
QWMW1034	1	21964-44-3	1-Nonen-3-ol	Alcohol	0.001	oily, creamy, green, earthy, mushroom
KMW0275*088	1	5989-33-3	2-Furanmethanol, 5-ethenyltetrahydro-.alpha.,.alpha.,5-trimethyl-, cis-	Alcohol	0.32	earthy, floral, sweet, woody
YZMW0320*015	1	4497-92-1	Bicyclo[4.1.0]hept-2-ene, 3,7,7-trimethyl-, (1S-cis)-	Terpenoids	4	-
XMW0006*015	1	498-15-7	(+)-3-Carene	Terpenoids	0.044	sweet
KMW0220*015	1	13466-78-9	3-Carene	Terpenoids	9.3	citrus, terpenic, herbal, pine, solvent, resinous, phenol, cypress, medicinal, woody
KMW0486*328	1	18433-98-2	Pyrazine, 2,5-dimethyl-3-(3-methylbutyl)-	Heterocyclic compound	-	fruity
KMW0686*322	2	4192-77-2	2-Propenoic acid, 3-phenyl-, ethyl ester, (E)-	Ester	0.0007	floral, honey, balsamic
XMW0948*363	2	351222-66-7	Valerena-4,7(11)-diene	Terpenoids	-	-
KMW0596*059	2	25246-27-9	Alloaromadendrene	Terpenoids	-	woody
KMW0550	2	23726-91-2	(E)-β-damascone	Terpenoids	2e-06	fruity, floral, berry, plum, black currant, honey, rose, tobacco
KMW0548*108	2	489-40-7	1H-Cycloprop[e]azulene, 1a,2,3,4,4a,5,6,7b-octahydro-1,1,4,7-tetramethyl-, [1aR-(1a.alpha.,4.alpha.,4a.beta.,7b.alpha.)]-	Terpenoids	-	woody, balsamic
YZMW0358*344	2	50-30-6	Benzoic acid, 2,6-dichloro-	Acid	955	-
XMW0045	2	92692-39-2	(1R,4R,4aS,8aR)-4,7-Dimethyl-1-(prop-1-en-2-yl)-1,2,3,4,4a,5,6,8a-octahydronaphthalene	Terpenoids	-	-
XMW1411	2	26560-14-5	1,3,6,10-Dodecatetraene, 3,7,11-trimethyl-, (Z,E)-	Terpenoids	0.087	-
XMW1492	2	51407-46-6	Benzeneacetaldehyde, .alpha.-methyl-4-(2-methylpropyl)-	Aldehyde	-	-
KMW0559	2	118-65-0	Bicyclo[7.2.0]undec-4-ene, 4,11,11-trimethyl-8-methylene-,[1R-(1R*,4Z,9S*)]-	Terpenoids	-	woody, spicy
GMW0003	2	121-32-4	Ethyl Vanillin	Aldehyde	0.1	sweet, creamy, vanilla, caramel
D448	2	39481-28-2	Furfuryl heptanoate	Ester	-	green
WMW0158	2	99-76-3	Methylparaben	Ester	1220	-
XMW0019	2	99-93-4	Acetophenone, 4'-hydroxy-	Ketone	5.5	mild, sweet, hawthorn, balsamic, mimosa
KMW0574*322	2	103-36-6	2-Propenoic acid, 3-phenyl-, ethyl ester	Ester	0.165	sweet, balsamic, fruity, spicy, powdery, berry, plum
D341*059	2	30021-46-6	Naphthalene, decahydro-1,6-bis(methylene)-4-(1-methylethyl)-, (4.alpha.,4a.alpha.,8a.alpha.)-	Terpenoids	-	-
XMW0629*108	2	2387-78-2	3H-3a,7-Methanoazulene, 2,4,5,6,7,8-hexahydro-1,4,9,9-tetramethyl-, [3aR-(3a.alpha.,4.beta.,7.alpha.)]-	Terpenoids	-	-
KMW0606*061	2	10208-80-7	.alpha.-Muurolene	Terpenoids	-	woody
KMW0616*152	2	39029-41-9	Naphthalene, 1,2,3,4,4a,5,6,8a-octahydro-7-methyl-4-methylene-1-(1-methylethyl)-, (1.alpha.,4a.beta.,8a.alpha.)-	Terpenoids	-	herbal, woody
KMW0618*064	2	483-76-1	δ-cadinene	Terpenoids	0.0015	thyme, herbal, woody, dry
KMW0624*381	2	3790-78-1	Cis-Nerolidol	Terpenoids	64	waxy, floral
NMW0200*147	2	77129-48-7	1,6,10-Dodecatriene, 7,11-dimethyl-3-methylene-	Terpenoids	0.087	-
XMW0967*361	2	28400-12-6	(1R,5S)-1,8-Dimethyl-4-(propan-2-ylidene)spiro[4.5]dec-7-ene	Terpenoids	-	-
NMW0206*363	2	68832-35-9	(1R,9R,E)-4,11,11-Trimethyl-8-methylenebicyclo[7.2.0]undec-4-ene	Terpenoids	-	-
NMW0227*137	2	13062-00-5	(Z)-1-Methyl-4-(6-methylhept-5-en-2-ylidene)cyclohex-1-ene	Terpenoids	-	-
NMW0229*271	2	135-19-3	2-Naphthalenol	Phenol	3	-
KMW0603*061	2	23986-74-5	Germacrene D	Terpenoids	0.0012	woody, spice
XMW2429*059	2	1405-16-9	Patchoulene	Terpenoids	-	-
KMW0271*194	2	108-39-4	Phenol, 3-methyl-	Phenol	0.38	smoky, petroleum
KMW0556*369	2	17066-67-0	Naphthalene, decahydro-4a-methyl-1-methylene-7-(1-methylethenyl)-, [4aR-(4a.alpha.,7.alpha.,8a.beta.)]-	Terpenoids	-	herbal
KMW0566*060	2	515-17-3	Naphthalene, decahydro-4a-methyl-1-methylene-7-(1-methylethylidene)-, (4aR-trans)-	Terpenoids	-	woody
KMW0590*083	2	4630-07-3	Naphthalene, 1,2,3,5,6,7,8,8a-octahydro-1,8a-dimethyl-7-(1-methylethenyl)-, [1R-(1.alpha.,7.beta.,8a.alpha.)]-	Terpenoids	-	sweet, fresh, citrus, grapefruit, woody, orange, asprin, dry, green, oily
WMW0003*364	2	10219-75-7	Naphthalene, 1,2,3,5,6,7,8,8a-octahydro-1,8a-dimethyl-7-(1-methylethenyl)-, [1S-(1.alpha.,7.alpha.,8a.alpha.)]-	Terpenoids	-	-
XMW0234*366	2	18252-46-5	cis-.alpha.-Bergamotene	Terpenoids	-	-
XMW0041*326	2	93-16-3	Benzene, 1,2-dimethoxy-4-(1-propenyl)-	Ether	1.6	spicy, clove, blossom, carnation, woody
XMW0009*064	2	523-47-7	Naphthalene, 1,2,4a,5,8,8a-hexahydro-4,7-dimethyl-1-(1-methylethyl)-, [1S-(1.alpha.,4a.beta.,8a.alpha.)]-	Terpenoids	-	green, woody
XMW0012*064	2	24406-05-1	Naphthalene, 1,2,4a,5,6,8a-hexahydro-4,7-dimethyl-1-(1-methylethyl)-, [1S-(1.alpha.,4a.beta.,8a.alpha.)]-	Terpenoids	-	woody, dry
XMW0112*060	2	5951-61-1	Naphthalene, 1,2,4a,5,8,8a-hexahydro-4,7-dimethyl-1-(1-methylethyl)-, (1.alpha.,4a.beta.,8a.alpha.)-(.+/-.)-	Terpenoids	-	-
XMW0264*152	2	150320-52-8	Bicyclo[4.4.0]dec-1-ene, 2-isopropyl-5-methyl-9-methylene-	Terpenoids	-	-
XMW0700*060	2	103827-22-1	4a,8-Dimethyl-2-(prop-1-en-2-yl)-1,2,3,4,4a,5,6,7-octahydronaphthalene	Terpenoids	-	-
XMW0819*058	2	157477-72-0	cis-Muurola-4(15),5-diene	Terpenoids	-	-
XMW0389*382	2	913176-41-7	Caryophyllenyl alcohol	Terpenoids	-	-
XMW0504*084	2	1461-03-6	1H-Benzocycloheptene, 2,4a,5,6,7,8-hexahydro-3,5,5,9-tetramethyl-, (R)-	Terpenoids	-	-
YZMW0707*271	2	90-15-3	1-Naphthalenol	Phenol	4	-
D339*137	2	29837-07-8	cis-.alpha.-Bisabolene	Terpenoids	-	-
YZMW0195*416	2	2305-36-4	Benzoic acid, 2-amino-4-methyl-	Acid	756	-
D244*457	2	23445-02-5	(3S,3aR,3bR,4S,7R,7aR)-4-Isopropyl-3,7-dimethyloctahydro-1H-cyclopenta[1,3]cyclopropa[1,2]benzen-3-ol	Terpenoids	-	spicy, minty
YZMW0369*344	2	50-84-0	Benzoic acid, 2,4-dichloro-	Acid	190	-
XMW0703	2	4887-30-3	Hexanoic acid, octyl ester	Ester	5	-
XMW0147	2	451-55-8	1-Methyl-4-(6-methylhept-5-en-2-yl)cyclohexa-1,3-diene	Terpenoids	-	-
XMW0160	2	38818-55-2	Megastigmatrienone	Ketone	-	-
YZMW0705	2	89-68-9	Phenol, 4-chloro-5-methyl-2-(1-methylethyl)-	Phenol	0.6	-
XMW0167	2	34764-71-1	1-(2,3,4,5-Tetramethylphenyl)ethanone	Ketone	-	-
XMW0271	2	1460-96-4	Cadina-1(10),6,8-triene	Terpenoids	-	-
XMW0388	2	6813-21-4	Selina-3,7(11)-diene	Terpenoids	-	-
XMW0203	2	2460-77-7	2,5-di-tert-Butyl-1,4-benzoquinone	Ketone	-	-
YZMW0659	2	771-99-3	4-Phenylpiperidine	Heterocyclic compound	48	-
YZMW0579	2	65-45-2	Salicylamide	Amine	1370	-
XMW0247	2	16982-00-6	Benzene, 1-methyl-4-(1,2,2-trimethylcyclopentyl)-, (R)-	Terpenoids	-	-
YZMW0600	2	6949-77-5	Cycloheptanecarboxylic acid, 1-amino-	Acid	143	-
YC_926	2	51-45-6	Histamine	Amine	70	-
XMW1354	2	2430-94-6	cis-5-Dodecenoic acid	Acid	-	-
XMW1435	2	29021-37-2	Isobutyric acid, 2-pinen-10-yl ester	Ester	-	fruity, woody, pine
XMW1461	2	18645-85-7	1-Amino-2-acetamino-3-fluorobenzene	Amine	-	-
XMW1476	2	121-97-1	1-Propanone, 1-(4-methoxyphenyl)-	Ketone	-	musty, anisic
YZMW0295	2	38049-04-6	(6R,7aR)-3,6-Dimethyl-5,6,7,7a-tetrahydrobenzofuran-2(4H)-one	Heterocyclic compound	0.0028	-
XMW0788	2	54646-55-8	Phenol, 4-methyl-2-nitro-, acetate (ester)	Ester	-	-
YZMW0154	2	1795-09-1	Thiophene, tetrahydro-2-methyl-	Heterocyclic compound	0.07	-
YZMW0175	2	2042-14-0	4-Methyl-3-nitrophenol	Phenol	2	-
XMW1095	2	33884-69-4	Benzene, 1,2-diethyl-3,4,5,6-tetramethyl-	Aromatics	-	-
XMW0979	2	823810-22-6	(4R,4aS,6S)-4,4a-Dimethyl-6-(prop-1-en-2-yl)-1,2,3,4,4a,5,6,7-octahydronaphthalene	Terpenoids	-	-
YZMW0242	2	3120-74-9	Phenol, 3-methyl-4-(methylthio)-	Phenol	0.2	-
GMW0266	2	127-51-5	α-isomethyl ionone	Terpenoids	0.01	floral, fruity, powdery, violet, woody, tea
KMW0660	2	18679-18-0	2(3H)-Furanone, dihydro-5-(2-octenyl)-, (Z)-	Ester	0.0054	sweet, fatty, waxy, dairy, creamy, fruity
KMW0736	2	498-02-2	Apocynin	Ketone	0.78	faint, sweet, vanillin
KMW0578	2	1118-27-0	Butanoic acid, 3-methyl-, 1-ethenyl-1,5-dimethyl-4-hexenyl ester	Ester	-	citrus, bergamot, lavender, peach, apricot, sage
KMW0622	2	20307-83-9	Cyclohexene, 3-(1,5-dimethyl-4-hexenyl)-6-methylene-, [S-(R*,S*)]-	Terpenoids	-	herbal, fruity, woody
KMW0613	2	502-61-4	α-farnesene	Terpenoids	0.087	citrus, herbal, lavender, bergamot, myrrh, neroli, green
KMW0602	2	629-62-9	Pentadecane	Hydrocarbons	13000	waxy
KMW0599	2	111-82-0	Dodecanoic acid, methyl ester	Ester	0.0035	waxy, soapy, creamy, coconut, mushroom
KMW0589	2	6753-98-6	Humulene	Terpenoids	0.16	woody
D254	2	23787-90-8	2H-2,4a-Methanonaphthalen-8(5H)-one, 1,3,4,6,7,8a-hexahydro-1,1,5,5-tetramethyl-	Terpenoids	-	dry, woody, patchouli, cedary, earthy, tobacco, incense
D24	2	98-10-2	Benzenesulfonamide	Amine	-	sweet, fruity, caramel, maple, fenugreek, brown, sugar, nutty, chicory, praline, butterscotch
D216	2	79-69-6	α-irone	Terpenoids	0.002	orris, floral, berry, violet, woody, powdery
D328	2	28908-27-2	(5R,10R)-10-Methyl-6-methylene-2-(propan-2-ylidene)spiro[4.5]dec-7-ene	Terpenoids	-	-
CY_023	2	132-64-9	Dibenzofuran	Heterocyclic compound	0.12	-
BPMW012	2	59-49-4	2(3H)-Benzoxazolone	Ester	-	-
D1352	2	586-38-9	Benzoic acid, 3-methoxy-	Acid	5	-
D18	2	93-04-9	Naphthalene, 2-methoxy-	Ether	0.001	sweet, naphthyl, floral, orange, blossom, acacia, neroli
D178	2	104188-25-2	(1R,3aR,5aR,9aS)-1,4,4,7-Tetramethyl-1,2,3,3a,4,5a,8,9-octahydrocyclopenta[c]benzofuran	Terpenoids	-	-
D171	2	103-95-7	3-(4-Isopropylphenyl)-2-methylpropionaldehyde	Aldehyde	-	floral, cyclamen, fresh, rhubarb, musty, green
D1666	2	830-13-7	Cyclododecanone	Ketone	0.43	-
D1612	2	77-83-8	Oxiranecarboxylic acid, 3-methyl-3-phenyl-, ethyl ester	Aldehyde	2	-
GMW0078	2	495-61-4	.beta.-Bisabolene	Terpenoids	-	balsamic, woody
D767	2	18127-01-0	Benzenepropanal, 4-(1,1-dimethylethyl)-	Aldehyde	0.1	-
GMW0242	2	1205-17-0	1,3-Benzodioxole-5-propanal, .alpha.-methyl-	Aldehyde	0.0011	watery, fresh, green, ozonous, cyclamen, hay
D425	2	37677-14-8	3-Cyclohexene-1-carboxaldehyde, 4-(4-methyl-3-pentenyl)-	Aldehyde	-	citrus, grassy, aldehydic, floral, marine
QWMW1271	2	33673-62-0	2(3H)-Furanone, dihydro-4-methyl-5-pentyl-	Ketone	-	waxy, lactonic, metallic, tuberose, plum
QWMW1267	2	102-19-2	Acetic acid, phenyl-, isopentyl ester	Ester	-	sweet, honey, cocoa, balsamic, chocolate, castoreum, animalic
WAMW0438	2	1129-41-5	Carbamic acid, methyl-, 3-methylphenyl ester	Ester	-	-
QWMW0953	2	621-59-0	Benzaldehyde, 3-hydroxy-4-methoxy-	Aldehyde	-	floral, popcorn, pencil, plastic
QWMW0952	2	23511-70-8	Butanoic acid, 2-phenoxyethyl ester	Ester	-	fruity, floral, honey, waxy, apple, chamomile
QWMW1114	2	999-40-6	Neryl butyrate	Ester	-	green, waxy, oily, fatty, sweet, leafy, orange
QWMW1080	2	7779-30-8	α-methyl ionone	Terpenoids	0.0024	sweet, powdery, fruity, floral, violet, beeswax, orris, woody
QWMW1028	2	51154-96-2	Massoilactone	Ester	0.59	sweet, coconut, meaty, lactonic, creamy, milky, waxy
WMW0218	2	128-37-0	Butylated Hydroxytoluene	Phenol	1	mild, phenol, camphor
WMW0212	2	23676-09-7	Benzoic acid, 4-ethoxy-, ethyl ester	Ester	-	-
WMW0007	2	3691-11-0	Azulene, 1,2,3,5,6,7,8,8a-octahydro-1,4-dimethyl-7-(1-methylethenyl)-, [1S-(1.alpha.,7.alpha.,8a.beta.)]-	Terpenoids	-	-
WAMW0913	2	21662-16-8	2,4-Dodecadienal, (E,E)-	Aldehyde	-	grapefruit, orange, fatty, citrus
NMW0236	2	156-38-7	Benzeneacetic acid, 4-hydroxy-	Acid	20	-
NMW0231	2	93-28-7	Phenol, 2-methoxy-4-(2-propenyl)-, acetate	Ester	100	fresh, sweet, woody, clove, floral, carnation, malty, spice
NMW0230	2	696-04-8	5,6-Dihydro-5-methyluracil	Heterocyclic compound	-	-
NMW0297	2	7320-37-8	Oxirane, tetradecyl-	Heterocyclic compound	-	-
NMW0217	2	520-63-8	1H-Pyrrolizine-7-methanol, 2,3,5,7a-tetrahydro-1-hydroxy-, (1S-cis)-	Alcohol	-	-
NMW0212	2	59-48-3	2H-Indol-2-one, 1,3-dihydro-	Ketone	-	-
NMW0211	2	7694-45-3	1-Cyclohexene-1-carboxylic acid, 4-(1-methylethenyl)-	Terpenoids	-	-
NMW0205	2	17598-02-6	Precocene I	Heterocyclic compound	-	-
QWMW0350	2	91-60-1	2-Naphthalenethiol	Alcohol	-	disagreeable, mercaptan
QWMW0666	2	94-02-0	Ethyl benzoylacetate	Ester	-	fruity, cherry, brandy, berry, woody, jammy
QMW0530	2	13187-99-0	2-Bromo dodecane	Halogenated hydrocarbons	-	-
WMW0012*061	2	54274-73-6	(+)-epi-Bicyclosesquiphellandrene	Terpenoids	-	-
XMW0176*061	2	31983-22-9	Naphthalene, 1,2,4a,5,6,8a-hexahydro-4,7-dimethyl-1-(1-methylethyl)-, (1.alpha.,4a.alpha.,8a.alpha.)-	Terpenoids	-	-
XMW0556*064	2	123123-37-5	(2S,4aR,8aR)-4a,8-Dimethyl-2-(prop-1-en-2-yl)-1,2,3,4,4a,5,6,8a-octahydronaphthalene	Terpenoids	-	-
WMW0043*381	2	142-50-7	Nerolidol	Terpenoids	-	mild, floral
KMW0573*147	2	18794-84-8	β-Farnesene	Terpenoids	0.087	woody, citrus, herbal, sweet
XMW0975*137	2	17627-44-0	Cyclohexene, 4-(1,5-dimethyl-1,4-hexadienyl)-1-methyl-	Terpenoids	-	balsamic, spicy, floral
D338*084	2	29621-78-1	.alpha.-Cuprenene	Terpenoids	-	-
KMW0261*194	2	106-44-5	p-Cresol	Phenol	0.00024	phenol, narcissus, animalic, mimosa
D300*369	2	26620-71-3	Aristolochene	Terpenoids	-	-
XMW0465*060	2	16729-00-3	1-Isopropyl-4,7-dimethyl-1,2,3,4,5,6-hexahydronaphthalene	Terpenoids	-	-
XMW0797*083	2	17627-24-6	Naphthalene, 1,2,4a,5,6,8a-hexahydro-4,7-dimethyl-1-(1-methylethyl)-,[1R-(1.alpha.,4a.alpha.,8a.alpha.)]-	Terpenoids	-	-
WAMW0914*364	2	21747-46-6	1H-Cycloprop[e]azulene, 1a,2,3,5,6,7,7a,7b-octahydro-1,1,4,7-tetramethyl-, [1aR-(1a.alpha.,7.alpha.,7a.beta.,7b.alpha.)]-	Terpenoids	-	-
GMW0001*326	2	6379-72-2	Benzene, 1,2-dimethoxy-4-(1-propenyl)-, (E)-	Ether	-	mild, spicy, clove
YZMW0229*416	2	2941-78-8	2-Amino-5-methylbenzoic acid	Acid	151	-
XMW0938*028	3	74744-60-8	3-Nonen-5-yne, 4-ethyl-, (E)-	Hydrocarbons	-	-
KMW0327*031	3	4959-35-7	Limonene oxide, trans-	Terpenoids	0.25	fresh, citrus
KMW0299*025	3	876-18-6	trans-Rose oxide	Terpenoids	0.0005	floral
KMW0241*014	3	15707-23-0	Pyrazine, 2-ethyl-3-methyl-	Heterocyclic compound	0.24	nutty, peanut, musty, corn, raw, earthy, bread
KMW0264*022	3	13360-65-1	Pyrazine, 3-ethyl-2,5-dimethyl-	Heterocyclic compound	0.0086	potato, cocoa, roasted, nutty
KMW0385*093	3	619-01-2	Cyclohexanol, 2-methyl-5-(1-methylethenyl)-	Terpenoids	-	minty, spice
KMW0555*366	3	13474-59-4	trans-.alpha.-Bergamotene	Terpenoids	-	woody, warm, tea
WMW0024*040	3	80-57-9	Bicyclo[3.1.1]hept-3-en-2-one, 4,6,6-trimethyl-	Terpenoids	-	camphor, menthol, celery
XMW0003*298	3	120-83-2	Phenol, 2,4-dichloro-	Phenol	0.0014	-
XMW0015*217	3	104-87-0	Benzaldehyde, 4-methyl-	Aldehyde	-	fruity, cherry, deep, phenol
WMW0100*268	3	10339-61-4	3-Nonen-1-ol, (E)-	Alcohol	-	green, waxy, melon, cucumber
QWMW0266*441	3	15707-24-1	2,3-Diethylpyrazine	Heterocyclic compound	0.05	burnt, caramel, chemical, mothball, prickling, roasted, hazelnut
QWMW0409*415	3	614-18-6	Ethyl nicotinate	Ester	7.781	grain, perfumy, paper
XMW0717*036	3	577-16-2	Ethanone, 1-(2-methylphenyl)-	Ketone	-	sweet, hawthorn, powdery, anisic, coumarin, phenol, burnt, nutty, honey
XMW0295*246	3	1124-20-5	Benzene, 1-methyl-3-(1-methylethenyl)-	Aromatics	-	-
XMW0525*026	3	5379-20-4	Benzene, 1-ethenyl-3,5-dimethyl-	Aromatics	-	-
D26*145	3	2050-09-1	Pentanoic acid, 3-methylbutyl ester	Ester	0.1	fruity, ripe apple, green
D329*114	3	28977-57-3	Myroxide	Terpenoids	-	-
KMW0126*010	3	108-50-9	Pyrazine, 2,6-dimethyl-	Heterocyclic compound	10	ethereal, cocoa, nutty, roasted, roasted, meaty, beefy, brown, coffee, buttermilky
KMW0198*257	3	99-83-2	.alpha.-Phellandrene	Terpenoids	0.04	citrus, herbal, terpene, green, woody, peppery
XMW0490	3	3145-76-4	1-Methyl-2-phenylcyclopropane	Aromatics	-	-
YZMW0417	3	5459-58-5	n-Butyl cyanoacetate	Ester	832	-
XMW0640	3	871660-95-6	Panaxene	Terpenoids	-	-
XMW0519	3	76308-11-7	Cyclobutanespiro-2'-bicyclo[1.1.0]butane-4'-spirocyclobutane	Hydrocarbons	-	-
XMW0119	3	54549-81-4	Cyclopentanone, 2-methyl-3-(1-methylethyl)-	Ketone	-	-
w37	3	432-24-6	2-Cyclohexene-1-carboxaldehyde, 2,6,6-trimethyl-	Aldehyde	-	-
XMW0091	3	64149-32-2	3-Isopropylidene-5-methyl-hex-4-en-2-one	Ketone	-	-
XMW0290	3	1188-63-2	4-Heptanone, oxime	Nitrogen compounds	-	-
XMW0289	3	1193-79-9	2-Acetyl-5-methylfuran	Heterocyclic compound	40.87	strong, musty, nutty, hay, coconut, coumarin, milky
XMW1378	3	29743-33-7	4,6-Octadiyn-3-one, 2-methyl-	Ketone	-	-
XMW1324	3	4411-89-6	Benzeneacetaldehyde, .alpha.-ethylidene-	Aldehyde	0.5	sweet, narcissus, cortex, beany, honey, cocoa, nutty, radish
XMW1233	3	767-05-5	3-Cyclopentyl-1-propanol	Alcohol	-	-
YZMW0042	3	109-12-6	2-Pyrimidinamine	Amine	3800	-
XMW2439	3	14159-61-6	Pyridine, 3-(2-methylpropyl)-	Heterocyclic compound	-	strong, aromatic
XMW0925	3	55659-42-2	Camphenone, 6-	Ketone	-	-
XMW0896	3	7036-98-8	5-Nonen-4-one, 6-methyl-	Ketone	-	-
XMW0944	3	5293-90-3	Cyclohexene, 2-ethenyl-1,3,3-trimethyl-	Hydrocarbons	-	-
XMW0776	3	583-04-0	Benzoic acid, 2-propenyl ester	Ester	-	sweet, floral, cherry, berry
XMW1126	3	29803-81-4	2-Cyclohexen-1-ol, 1-methyl-4-(1-methylethyl)-, trans-	Terpenoids	-	-
XMW1125	3	74645-87-7	4-Undecene, 3-methyl-, (Z)-	Hydrocarbons	-	-
YZMW0127	3	15111-56-5	Ethyl 3-cyclohexenecarboxylate	Ester	3e-06	-
KMW0364	3	4410-99-5	Phenethyl mercaptan	Alcohol	5	rubbery, sulfury
KMW0293	3	30361-28-5	2,4-Octadienal, (E,E)-	Aldehyde	0.14	green, fatty, pear, melon, peel
KMW0404	3	91-20-3	Naphthalene	Aromatics	0.05	pungent, dry, tarry
KMW0462	3	65-85-0	Benzoic acid	Acid	0.568	faint, balsamic, urine
KMW0418	3	18486-69-6	(1R)-(-)-Myrtenal	Aldehyde	-	sweet, cinnamon, tonka, spicy, terpene, camphor, jammy
KMW0132	3	5910-89-4	Pyrazine, 2,3-dimethyl-	Heterocyclic compound	0.1	nutty, nut skin, cocoa, peanut, buttery, coffee, walnut, caramel, roasted
KMW0147	3	100-71-0	Pyridine, 2-ethyl-	Heterocyclic compound	0.057	green, grassy
KMW0496	3	2305-25-1	Hexanoic acid, 3-hydroxy-, ethyl ester	Ester	0.045	fruity, grape, burnt, woody, hay, spicy, pineapple, cranberry, dusty, woody
KMW0722	3	2628-17-3	4-Vinylphenol	Phenol	0.01	chemical, woody
NMW0050	3	140-29-4	Benzyl nitrile	Nitrogen compounds	1.2	-
NMW0029	3	104-57-4	Formic acid, phenylmethyl ester	Ester	168.54	floral, fruity, spicy, almond, cranberry, black currant, tea
D316	3	281-23-2	Adamantane	Hydrocarbons	2100	-
D30	3	2442-10-6	1-Octen-3-yl-acetate	Ester	0.09	fresh, green, herbal, lavender, fruity, oily
GGMW0153	3	19713-73-6	Methyl cis-cinnamate	Ester	-	-
GMW0131	3	68039-49-6	2,4-Dimethylcyclohex-3-ene-1-carbaldehyde	Aldehyde	-	green, aldehydic, leafy, cortex, tart, floral, peel
D384	3	34135-85-8	Trisulfide, methyl 2-propenyl	Sulfur compounds	-	alliaceous, creamy, garlic, onion
D366	3	33046-81-0	3-Octen-2-one, 7-methyl-	Ketone	-	fatty, oily, lactonic, nutty, meaty, tallow, fatty
WAMW0407	3	112-23-2	Formic acid, heptyl ester	Ester	-	green, waxy, floral, herbal, plum, apple, cucumber
WAMW0369	3	110-98-5	2-Propanol, 1,1'-oxybis-	Alcohol	240	mild alcoholic
QWMW1171	3	13679-60-2	2-methyl-5-[(methylthio)methyl]furan	Heterocyclic compound	-	mustard, onion
WMW0126	3	61142-36-7	1,3-Hexadiene, 3-ethyl-2-methyl-	Hydrocarbons	-	nutty
WMW0082	3	13688-67-0	1,10-Undecadiene	Hydrocarbons	-	-
XMW0008	3	78-59-1	Isophorone	Ketone	0.011	cool, woody, sweet, green, camphor, fruity, musty, cedarwood, tobacco, leathery
WAMW2187	3	89-48-5	Menthyl acetate	Terpenoids	-	tea, minty, fruity
WAMW0663	3	1534-27-6	3-Dodecanone	Ketone	0.0083	-
QWMW0356	3	15834-78-3	Pyrazine, 5-butyl-2,3-dimethyl-	Heterocyclic compound	0.77	earthy, sweet
QWMW0720	3	688-82-4	Heptane, 1,1-diethoxy-	Ether	-	fresh, herbal, winey, green, leafy, waxy, citrus
QWMW0092	3	74410-10-9	Dill ether	Terpenoids	-	dill
XMW0932*028	3	74744-26-6	3-Nonen-5-yne, 4-ethyl-, (Z)-	Hydrocarbons	-	-
KMW0328*031	3	6909-30-4	(+)-(E)-Limonene oxide	Terpenoids	0.2	green
WAMW0588*014	3	13925-03-6	Pyrazine, 2-ethyl-6-methyl-	Heterocyclic compound	0.04	roasted, potato
KMW0183*014	3	13360-64-0	Pyrazine, 2-ethyl-5-methyl-	Heterocyclic compound	0.016	coffee, beany, nutty, grassy, roasted
KMW0197*257	3	2243-33-6	(S)-(+)-alpha-Phellandrene	Terpenoids	0.2	dill
KMW0268*022	3	13925-07-0	Pyrazine, 2-ethyl-3,5-dimethyl-	Heterocyclic compound	4e-05	burnt, almond, roasted, nutty, coffee
WAMW0550*022	3	13067-27-1	Pyrazine, 2,6-diethyl-	Heterocyclic compound	0.006	nutty, hazelnut
KMW0269*022	3	15707-34-3	2,3-Dimethyl-5-ethylpyrazine	Heterocyclic compound	0.53	burnt, popcorn, roasted, cocoa
XMW2392*441	3	13238-84-1	Pyrazine, 2,5-diethyl-	Heterocyclic compound	0.007	nutty, hazelnut
KMW0307*246	3	1195-32-0	Benzene, 1-methyl-4-(1-methylethenyl)-	Aromatics	0.085	phenol, spicy, clove, guaiacol
XMW1431*026	3	27831-13-6	Benzene, 4-ethenyl-1,2-dimethyl-	Aromatics	-	-
D272*145	3	2445-77-4	Butanoic acid, 3-methyl-, 2-methylbutyl ester	Ester	-	herbal, fruity, earthy, cheese, apple, green
KMW0125*010	3	123-32-0	Pyrazine, 2,5-dimethyl-	Heterocyclic compound	1.75	cocoa, roasted, nutty, roasted, beefy, woody, grassy, medicinal
YZMW0604	4	6981-15-3	Benzene, 2-chloro-5-methoxy-1,3-dimethyl-	Halogenated hydrocarbons	0.23	-
XMW1170*142	4	51117-19-2	Butanoic acid, 2-methyl-, 3,7-dimethyl-2,6-octadienyl ester, (Z)-	Ester	-	-
NMW0078*258	4	99-08-1	Benzene, 1-methyl-3-nitro-	Nitrogen compounds	0.25	-
KMW0645*133	4	23089-26-1	Levomenol	Terpenoids	-	fruity, nutty, coconut
NMW0243*391	4	1963-36-6	4-Methoxycinnamaldehyde	Aldehyde	-	spicy, cinnamon, sweet, cherry, vanilla, floral
NMW0109*224	4	488-17-5	1,2-Benzenediol, 3-methyl-	Alcohol	16	-
XMW2677*321	4	21693-55-0	Naphthalene, 1,2,3,4-tetrahydro-1,5,7-trimethyl-	Aromatics	0.002	-
NMW0246*391	4	24680-50-0	trans-4-Methoxycinnamaldehyde	Aldehyde	-	spicy, floral, sweet, cinnamon, cherry, vanilla
KMW0230*229	4	1669-44-9	3-Octen-2-one	Ketone	3e-05	earthy, spicy, herbal, sweet, mushroom, hay, blueberry
XMW0136*357	4	50277-34-4	4-Isopropyl-6-methyl-1-methylene-1,2,3,4-tetrahydronaphthalene	Terpenoids	-	-
WMW0061*138	4	22927-13-5	Benzaldehyde, 2-ethyl-	Aldehyde	-	nutty, roasted
XMW0257*415	4	1570-45-2	4-Pyridinecarboxylic acid, ethyl ester	Ester	-	-
XMW0662*082	4	91-57-6	Naphthalene, 2-methyl-	Aromatics	0.004	sweet, floral, woody
XMW0534*040	4	1196-01-6	Bicyclo[3.1.1]hept-3-en-2-one, 4,6,6-trimethyl-, (1S)-	Terpenoids	-	spicy, minty, camphor
NMW0266*103	4	5273-86-9	.beta.-Asarone	Ether	-	-
XMW0746*118	4	124753-76-0	(1R,2R,4S,6S,7S,8S)-8-Isopropyl-1-methyl-3-methylenetricyclo[4.4.0.02,7]decan-4-ol	Terpenoids	-	-
D408*420	4	3564-95-2	(1Alpha,3beta,4beta)-p-menthane-3,8-diol	Terpenoids	-	-
w08*082	4	90-12-0	Naphthalene, 1-methyl-	Aromatics	0.008	naphthyl, chemical, medicinal, camphor
BPMW015*248	4	2380-94-1	1H-Indol-4-ol	Alcohol	-	-
XMW0497	4	932-95-6	2,5-Thiophenedicarboxaldehyde	Aldehyde	-	-
XMW0658	4	18999-28-5	2-Heptenoic acid	Acid	-	green, grassy, fruity, ethereal
XMW0553	4	7250-94-4	2-Acetoxyacetophenone	Ketone	-	-
XMW0672	4	461-89-2	1,2,4-Triazine-3,5(2H,4H)-dione	Ketone	-	-
YZMW0764	4	99-55-8	Benzenamine, 2-methyl-5-nitro-	Amine	30	-
XMW0133	4	50464-95-4	6-Methyl-6-(5-methylfuran-2-yl)heptan-2-one	Ketone	-	-
XMW0130	4	5132-75-2	Heptanoic acid, octyl ester	Ester	-	fruity, fatty
XMW0046	4	91110-19-9	trans-3a-cis-9a-1,2,3,3a,8,9,9a,9b-octahydro-4H-cyclopenta[def]phenanthrene	Aromatics	-	-
XMW0054	4	83637-40-5	Farnesene epoxide, E-	Terpenoids	0.41	-
XMW0114	4	586-96-9	Benzene, nitroso-	Nitrogen compounds	0.15	-
XMW0275	4	141-10-6	3,5,9-Undecatrien-2-one, 6,10-dimethyl-	Ketone	0.8	sweet, waxy, citrus, floral, balsamic, dry, dusty, powdery, spicy
YZMW0568	4	637-53-6	Ethanethioamide, N-phenyl-	Amine	1.5	-
XMW0189	4	29548-14-9	3-Cyclohexene-1-acetaldehyde, .alpha.,4-dimethyl-	Aldehyde	-	spicy, herbal
XMW1336	4	53084-33-6	N-Benzyloxy-2-carbomethoxyaziridine	Heterocyclic compound	-	-
YZMW0002	4	100-21-0	Terephthalic acid	Acid	6640	-
XMW1328	4	4668-61-5	2(1H)-Naphthalenone, 3,4,4a,5,6,7-hexahydro-1,1,4a-trimethyl-	Ketone	-	-
YC_1012	4	73188-23-5	4-(4-Methylpent-3-enyl)-3,6-dihydro-1,2-dithiin	Heterocyclic compound	0.01	-
XMW1385	4	23996-53-4	3-Imidazol-1-ylpropanenitrile	Heterocyclic compound	-	-
YZMW0085	4	121-92-6	Benzoic acid, 3-nitro-	Acid	134	-
XMW1321	4	14133-54-1	Furan, 2-(1,2-diethoxyethyl)-	Heterocyclic compound	-	-
XMW1468	4	78996-11-9	(2,2,6-Trimethyl-bicyclo[4.1.0]hept-1-yl)-methanol	Alcohol	-	-
XMW1469	4	4917-90-2	Benzene, 1-methoxy-4-(1-methylpropyl)-	Ether	-	-
XMW0774	4	54340-96-4	3-Hexene, 1-(1-methoxyethoxy)-, (Z)-	Ether	-	-
XMW0760	4	113-00-8	Guanidine	Nitrogen compounds	-	-
YZMW0347	4	498-21-5	Butanedioic acid, methyl-	Acid	99	-
XMW0837	4	116761-73-0	1-(3-Methylbutyl)-2,3,5,6-tetramethylbenzene	Aromatics	-	-
XMW0809	4	13988-67-5	1,3-Pentanedione, 4,4-dimethyl-1-phenyl-	Ketone	-	-
XMW0802	4	22128-99-0	2-Hydroxymethylbenzimidazole	Heterocyclic compound	-	-
XMW0989	4	105191-67-1	12-Oxatetracyclo[4.3.1.1(2,5).1(4,10)]dodecane, 11-isopropylidene-	Heterocyclic compound	-	-
KMW0334	4	10458-14-7	Cyclohexanone, 5-methyl-2-(1-methylethyl)-	Terpenoids	0.0047	minty
KMW0323	4	100-51-6	Benzyl alcohol	Alcohol	0.1	floral, rose, phenol, balsamic
KMW0298	4	876-17-5	cis-Rose oxide	Terpenoids	0.0001	floral
GMW0406	4	102488-09-5	4-Hydroxy-β-damascone	Ketone	-	-
KMW0681	4	60066-88-8	2,6,11-Dodecatrienal, 2,6-dimethyl-10-methylene-	Terpenoids	-	orange, sweet, fresh, waxy, juicy
KMW0654	4	124-10-7	Methyl tetradecanoate	Ester	-	fatty, waxy, petal
KMW0646	4	7540-53-6	Citronellyl valerate	Ester	-	rose, herbal, honey
KMW0625	4	1117-55-1	Octanoic acid, hexyl ester	Ester	0.07	fruity, green, waxy, berry, apple, estery
CY_234	4	88-99-3	1,2-Benzenedicarboxylic acid	Acid	54	-
D157	4	103-59-3	Propanoic acid, 2-methyl-, 3-phenyl-2-propenyl ester	Ester	-	sweet, fruity, almond, spicy, cinnamyl, tropical
GMW0249	4	122-67-8	2-Propenoic acid, 3-phenyl-, 2-methylpropyl ester	Ester	-	sweet, balsamic, fruity, labdanum
GMW0155	4	104-90-5	Pyridine, 5-ethyl-2-methyl-	Heterocyclic compound	0.019	nutty, strong, raw, potato, roasted, earthy
D429	4	38142-57-3	2-Methyl-6-(p-tolyl)hept-2-en-4-ol	Terpenoids	-	-
QWMW1251	4	103-56-0	2-Propen-1-ol, 3-phenyl-, propanoate	Ester	-	sweet, spicy, fruity, balsamic, grape
QWMW1245	4	103-61-7	Butanoic acid, 3-phenyl-2-propenyl ester	Ester	159	soft, fruity, winey, cognac, cinnamyl, balsamic
QWMW1227	4	92-48-8	2H-1-Benzopyran-2-one, 6-methyl-	Ester	-	sweet, coconut, vanilla, creamy, powdery, floral
WAMW0570	4	134-62-3	Diethyltoluamide	Amine	-	-
WAMW0286	4	1078-71-3	Benzene, heptyl-	Aromatics	4	-
XMW0017	4	112-39-0	Hexadecanoic acid, methyl ester	Ester	4000	oily, waxy, fatty, orris
NMW0249	4	62235-06-7	(3E,7E)-4,8,12-Trimethyltrideca-1,3,7,11-tetraene	Terpenoids	-	-
NMW0244	4	2446-69-7	Phenol, 4-hexyl-	Phenol	-	-
NMW0158	4	91-23-6	Benzene, 1-methoxy-2-nitro-	Ether	-	-
NMW0124	4	490-03-9	2-Cyclohexen-1-one, 2-hydroxy-3-methyl-6-(1-methylethyl)-	Terpenoids	-	minty, buchu, leafy, black currant, bud, phenol, corn mint, menthol, herbal, woody
QWMW0413	4	5058-19-5	Pyridine, 2-butyl-	Heterocyclic compound	-	green, sweet
QWMW0733	4	67883-79-8	(Z)-Hex-3-enyl (E)-2-methylbut-2-enoate	Ester	-	green, herbal, vegetable, fruity, vegetable, mushroom
QWMW0681	4	85554-72-9	Octanoic acid, 2-hexenyl ester, (E)-	Ester	-	green, fruity, pear, oily, winey, earthy
QWMW0671	4	89-65-6	Erythorbic acid	Acid	-	acid
QWM0004	4	30364-38-6	Naphthalene, 1,2-dihydro-1,1,6-trimethyl-	Aromatics	0.0025	licorice
D441*142	4	3915-83-1	Butanoic acid, 3-methyl-, 3,7-dimethyl-2,6-octadienyl ester, (Z)-	Ester	-	sweaty, floral, rose, bergamot, citrus, fruity
NMW0119*224	4	452-86-8	1,2-Benzenediol, 4-methyl-	Alcohol	45	-
XMW0170*138	4	34246-54-3	Benzaldehyde, 3-ethyl-	Aldehyde	-	-
QWMW0814*321	4	475-03-6	Naphthalene, 1,2,3,4-tetrahydro-1,1,6-trimethyl-	Aromatics	0.002	woody, camphor, naphthelene, fruityiness
NMW0123*420	4	3564-98-5	p-Menthane-3,8-diol, cis-1,3,trans-1,4-	Terpenoids	-	herbal, eucalyptus, minty
KMW0359*429	5	620-17-7	Phenol, 3-ethyl-	Phenol	0.00085	musty
KMW0386*281	5	3792-53-8	cis-Dihydrocarvone	Terpenoids	-	herbal, warm
NMW0264*302	5	588-30-7	2-Propenoic acid, 3-(3-hydroxyphenyl)-	Acid	10	-
D398*385	5	35153-13-0	5-Tetradecen-1-ol, acetate, (Z)-	Ester	-	-
XMW0394	5	1988-89-2	Phenol, 4-(1-phenylethyl)-	Phenol	-	-
XMW0062	5	7779-31-9	2-Propenoic acid, 2-methyl-, 3,3,5-trimethylcyclohexyl ester	Ester	-	-
XMW0387	5	4292-19-7	Dodecane, 1-iodo-	Halogenated hydrocarbons	-	-
XMW0236	5	1759-28-0	Thiazole, 5-ethenyl-4-methyl-	Heterocyclic compound	0.3	musty, nutty, root, vegetable, cocoa
YC_382	5	85-01-8	Phenanthrene	Aromatics	1	-
YZMW0036	5	1080-06-4	L-Tyrosine, methyl ester	Ester	27900	-
XMW2452	5	1438-94-4	1H-Pyrrole, 1-(2-furanylmethyl)-	Heterocyclic compound	0.1	plastic, green, waxy, fruity, coffee, vegetable
XMW1413	5	13798-23-7	Hexathiane	Sulfur compounds	-	-
XMW0828	5	69286-06-2	2,2'-Bis(4,5-dimethylimidazole)	Heterocyclic compound	-	-
D330	5	28994-41-4	Phenol, 2-(phenylmethyl)-	Phenol	-	-
D163	5	10373-78-1	dl-Camphoroquinone	Terpenoids	-	-
QWMW1230	5	188417-26-7	Ethylvanillin, 2-methylpropionate	Ester	-	sweet, creamy, vanilla, chocolate, milky
NMW0337	5	105-99-7	Dibutyl adipate	Ester	-	-
NMW0328	5	486-25-9	9H-Fluoren-9-one	Ketone	-	-
NMW0323	5	2478-38-8	Ethanone, 1-(4-hydroxy-3,5-dimethoxyphenyl)-	Ketone	1.999	-
QWMW0656	5	63253-24-7	4-(4,5-Dimethyl-1,3-dioxolan-2-yl)-2-methoxyphenol	Phenol	-	vanilla
NMW0360	5	1689-64-1	9H-Fluoren-9-ol	Alcohol	-	-
NMW0446	5	82-57-5	Visnagin	Heterocyclic compound	-	-
XMW0300*429	5	108-68-9	Phenol, 3,5-dimethyl-	Phenol	5	balsamic, coffee
WAMW1443*429	5	526-75-0	Phenol, 2,3-dimethyl-	Phenol	0.5	phenol, chemical, musty
QWMW1206*429	5	95-65-8	Phenol, 3,4-dimethyl-	Phenol	1.2	flat, dry
WAMW1520*281	5	5524-05-0	(+)-Dihydrocarvone	Terpenoids	0.82	herbal, minty, menthol
D242*385	5	23192-82-7	9-Tetradecen-1-ol, acetate, (E)-	Ester	-	-
XMW0617	6	77-68-9	Propanoic acid, 2-methyl-, 3-hydroxy-2,2,4-trimethylpentyl ester	Ester	-	-
XMW0627	6	84-66-2	Diethyl Phthalate	Ester	0.33	bitter
XMW1485	6	166273-38-7	Pentanoic acid, 5-hydroxy-, 2,4-di-t-butylphenyl esters	Ester	-	-
GMW0393	6	71596-72-0	(1R,3aS,5aS,8aR)-1,3a,5a-Trimethyl-4-methylenedecahydrocyclopenta[c]pentalene	Terpenoids	-	-
KMW0684	6	713-95-1	.delta.-Dodecalactone	Ester	0.0076	peachy, oily, creamy, soapy
D83	6	10032-02-7	Hexanoic acid, 3,7-dimethyl-2,6-octadienyl ester, (E)-	Ester	0.15	rose, geranium, fruity, waxy
GMW0208	6	111-80-8	2-Nonynoic acid, methyl ester	Ester	-	floral, green, violet, leafy, melon, cucumber
GMW0166	6	105-90-8	Geranyl propionate	Ester	0.01	floral, fresh, waxy, fruity, rose, tropical
WAMW1285	6	4313-03-5	2,4-Heptadienal, (E,E)-	Aldehyde	0.056	fatty, green, oily, aldehydic, vegetable, cake, cinnamon
WAMW1788	6	6259-76-3	n-Hexyl salicylate	Ester	-	fresh, herbal, orchid, green
WAMW1705	6	611-70-1	Isopropyl phenyl ketone	Ketone	-	green
KMW0597*061	7	30021-74-0	.gamma.-Muurolene	Terpenoids	-	herbal, woody, spice
XMW1182*054	7	21996-77-0	Di-epi-.alpha.-cedrene-(I)	Terpenoids	-	-
KMW0679*301	7	1754-62-7	2-Propenoic acid, 3-phenyl-, methyl ester, (E)-	Ester	-	sweet, balsamic, strawberry, cherry
KMW0614*066	7	29837-12-5	Cubenene	Terpenoids	-	spicy, fruity, mango
NMW0195*057	7	21040-45-9	2-Propen-1-ol, 3-phenyl-, acetate, (E)-	Ester	0.002	sweet, floral, spicy, balsamic
XMW0965*143	7	159407-35-9	(1S,5S)-2-Methyl-5-((R)-6-methylhept-5-en-2-yl)bicyclo[3.1.0]hex-2-ene	Hydrocarbons	-	-
XMW0962*110	7	56423-40-6	Butanoic acid, 2-methyl-, phenylmethyl ester	Ester	-	-
NMW0142*081	7	10235-63-9	Cyclohexanol, 1-methyl-4-(1-methylethylidene)-, acetate	Ester	-	-
KMW0303*301	7	103-26-4	2-Propenoic acid, 3-phenyl-, methyl ester	Ester	0.011	sweet, balsamic, strawberry, cherry, cinnamon
KMW0572*446	7	140-10-3	trans-Cinnamic acid	Acid	5	balsamic, sweet, storax
KMW0576*365	7	489-39-4	Aromandendrene	Terpenoids	-	woody
KMW0533*241	7	83-34-1	Indole, 3-methyl-	Heterocyclic compound	0.00041	animalic, fecal, indole, civet
KMW0528*355	7	31501-11-8	Hexanoic acid, 3-hexenyl ester, (Z)-	Ester	0.781	fruity, green, waxy, pear, winey, tropical, grassy, pineapple
KMW0522*146	7	3856-25-5	Copaene	Terpenoids	0.006	woody, spicy, honey
XMW0143*108	7	469-61-4	1H-3a,7-Methanoazulene, 2,3,4,7,8,8a-hexahydro-3,6,8,8-tetramethyl-, [3R-(3.alpha.,3a.beta.,7.beta.,8a.alpha.)]-	Terpenoids	-	woody, cedary, sweet, fresh
WMW0004*054	7	14912-44-8	Ylangene	Terpenoids	-	-
WMW0008*362	7	475-20-7	Longifolene	Terpenoids	-	sweet, woody, rose, medicinal, fir, needle
WMW0010*371	7	515-13-9	Cyclohexane, 1-ethenyl-1-methyl-2,4-bis(1-methylethenyl)-, [1S-(1.alpha.,2.beta.,4.beta.)]-	Terpenoids	-	sweet
XMW0197*058	7	267665-20-3	(1S,4S,4aS)-1-Isopropyl-4,7-dimethyl-1,2,3,4,4a,5-hexahydronaphthalene	Terpenoids	-	-
WMW0223*365	7	11028-42-5	Cedrene	Terpenoids	-	cedarwood, woody
WMW0146*427	7	489-28-1	.alpha.-Maaliene	Terpenoids	-	-
XMW0822*056	7	18252-44-3	(1R,2S,6S,7S,8S)-8-Isopropyl-1-methyl-3-methylenetricyclo[4.4.0.02,7]decane-rel-	Terpenoids	-	-
XMW3798*413	7	99-05-8	Benzoic acid, 3-amino-	Acid	1100	-
YZMW0280*327	7	35946-91-9	Phenol, 2,5-bis(1-methylethyl)-	Phenol	0.1	-
D293*137	7	25532-79-0	Cyclohexene, 4-[(1E)-1,5-dimethyl-1,4-hexadien-1-yl]-1-methyl-	Terpenoids	-	-
D353*059	7	317819-80-0	(S,1Z,6Z)-8-Isopropyl-1-methyl-5-methylenecyclodeca-1,6-diene	Terpenoids	-	-
w38*056	7	546-28-1	1H-3a,7-Methanoazulene, octahydro-3,8,8-trimethyl-6-methylene-, [3R-(3.alpha.,3a.beta.,7.beta.,8a.alpha.)]-	Terpenoids	-	-
KMW0210*362	7	13744-15-5	1H-Cyclopenta[1,3]cyclopropa[1,2]benzene, octahydro-7-methyl-3-methylene-4-(1-methylethyl)-, [3aS-(3a.alpha.,3b.beta.,4.beta.,7.alpha.,7aS*)]-	Terpenoids	-	citrus, fruity, radish
XMW0469	7	36577-33-0	(1R,3aS,8aS)-7-Isopropyl-1,4-dimethyl-1,2,3,3a,6,8a-hexahydroazulene	Terpenoids	-	-
XMW0462	7	488-10-8	2-Cyclopenten-1-one, 3-methyl-2-(2-pentenyl)-, (Z)-	Ketone	0.00026	woody, herbal, floral, spicy, jasmin, celery
XMW0728	7	83173-76-6	Benzenemethanol, 4-methyl-.alpha.-(1-methyl-2-propenyl)-, (R*,R*)-	Alcohol	-	-
XMW0423	7	54868-48-3	6,8-Nonadien-2-one, 8-methyl-5-(1-methylethyl)-, (E)-	Ketone	-	-
YZMW0495	7	606-20-2	Benzene, 2-methyl-1,3-dinitro-	Nitrogen compounds	0.05	-
XMW0555	7	1646-26-0	2-Acetylbenzofuran	Heterocyclic compound	-	sweet, coumarin, floral, orange, flowery, tropical, neroli, lactonic, honeysuckle, honey
XMW0682	7	61967-11-1	Benzenemethanol, .alpha.-methyl-.alpha.-(1-methyl-2-propenyl)-	Alcohol	-	-
XMW0685	7	108342-25-2	(2S,6R,7S,8E)-(+)-2,7-Epoxy-4,8-megastigmadiene	Heterocyclic compound	-	-
XMW0552	7	59212-75-8	2,2'-Isopropylidenebis(5-methylfuran)	Heterocyclic compound	-	-
XMW0544	7	22567-17-5	Azulene, 1,2,3,3a,4,5,6,7-octahydro-1,4-dimethyl-7-(1-methylethenyl)-, [1R-(1.alpha.,3a.beta.,4.alpha.,7.beta.)]-	Terpenoids	-	musty
YZMW0458	7	57726-26-8	Phenol, 4-(ethoxymethyl)-	Phenol	0.1	-
YZMW0738	7	95-76-1	Benzenamine, 3,4-dichloro-	Amine	0.003	-
YZMW0731	7	947-04-6	Azacyclotridecan-2-one	Ketone	3950	-
XMW0118	7	55012-72-1	1-Naphthalenol, 5,6,7,8-tetrahydro-2,5-dimethyl-8-(1-methylethyl)-	Terpenoids	-	-
XMW0107	7	612-14-6	1,2-Benzenedimethanol	Alcohol	-	-
XMW0280	7	13183-16-9	Carbonic acid, phenyl propyl ester	Ester	-	-
XMW0262	7	154098-14-3	1,1,7,7a-Tetramethyl-1a,2,6,7,7a,7b-hexahydro-1H-cyclopropa[a]naphthalene	Terpenoids	-	-
XMW0379	7	242794-76-9	Bicyclo[5.2.0]nonane, 2-methylene-4,8,8-trimethyl-4-vinyl-	Terpenoids	-	-
XMW0384	7	514-51-2	4,7-Methanoazulene, 1,2,3,4,5,6,7,8-octahydro-1,4,9,9-tetramethyl-, [1S-(1.alpha.,4.alpha.,7.alpha.)]-	Terpenoids	-	-
XMW0209	7	22539-72-6	1,4-Cyclohexadiene-1-methanol, 4-(1-methylethyl)-	Alcohol	-	-
XMW0738	7	619-45-4	Benzoic acid, 4-amino-, methyl ester	Ester	-	-
YC_509	7	621-58-9	Phenol, 5-ethenyl-2-methoxy-	Phenol	0.00015	-
XMW1345	7	2035-99-6	Octanoic acid, 3-methylbutyl ester	Ester	0.07	sweet, oily, fruity, green, soapy, pineapple, coconut
XMW1341	7	2404-87-7	Thiophene, 3-phenyl-	Heterocyclic compound	-	-
XMW1252	7	13837-12-2	2(1H)-Naphthalenone, 3,4,5,6,7,8-hexahydro-	Ketone	-	-
XMW1256	7	20483-36-7	2-Butanone, 4-(2,6,6-trimethyl-1,3-cyclohexadien-1-yl)-	Ketone	-	floral
XMW1316	7	5470-34-8	4-Methoxyformanilide	Amine	-	-
XMW1408	7	489-29-2	1H-Cyclopropa[a]naphthalene, 1a,2,3,3a,4,5,6,7b-octahydro-1,1,3a,7-tetramethyl-, [1aR-(1a.alpha.,3a.alpha.,7b.alpha.)]-	Terpenoids	-	-
XMW3348	7	606-45-1	Benzoic acid, 2-methoxy-, methyl ester	Ester	-	herbal, floral, hyacinth, canga, fruity, black currant
XMW1439	7	5279-14-1	Benzene, (1-nitropropyl)-	Nitrogen compounds	-	-
XMW0869	7	67517-14-0	Neoisolongifolene, 8,9-dehydro-	Terpenoids	-	-
XMW0971	7	37526-87-7	Benzyl angelate	Ester	-	-
XMW0950	7	22824-32-4	Naphthalene, 1,2,3,4-tetrahydro-1,4,6-trimethyl-	Aromatics	-	-
XMW0946	7	54411-10-8	Ethanol, 2-(4-ethylphenoxy)-	Alcohol	-	-
YZMW0269	7	34386-42-0	Benzenemethanol, 4-(1,1-dimethylethyl)-.alpha.-methyl-	Alcohol	219.4	-
XMW2972	7	3853-83-6	1H-Benzocycloheptene, 2,4a,5,6,7,8,9,9a-octahydro-3,5,5-trimethyl-9-methylene-, (4aS-cis)-	Terpenoids	-	-
XMW1102	7	17719-70-9	Vinyl trans-cinnamate	Ester	-	-
YZMW0225	7	2932-65-2	4-n-Propylacetophenone	Ketone	151.5	-
YZMW0227	7	29344-95-4	Benzaldehyde, 2,3,4,5-tetramethyl-	Aldehyde	0.35	-
YZMW0219	7	2756-85-6	Cyclohexanecarboxylic acid, 1-amino-	Acid	3710	-
GMW0369	7	18431-82-8	Spiro[5.5]undec-2-ene, 3,7,7-trimethyl-11-methylene-, (-)-	Terpenoids	-	-
GMW0349	7	94-59-7	Safrole	Heterocyclic compound	0.1	sweet, warm, spicy, woody, floral, sassafrass, anisic
GMW0254	7	122-74-7	Benzenepropanol, propanoate	Ester	-	floral, balsamic, hyacinth, mimosa
KMW0664	7	15352-77-9	3-Cyclohexen-1-ol, 1-(1,5-dimethyl-4-hexenyl)-4-methyl-	Terpenoids	-	citrus, floral, tangy, lemon, fresh, sweet, herbal
NMW0006	7	491-09-8	2-Cyclohexen-1-one, 3-methyl-6-(1-methylethylidene)-	Terpenoids	-	sharp, minty, phenol
KMW0560	7	91-64-5	Coumarin	Heterocyclic compound	0.01	sweet, hay, tonka, new-mown hay
KMW0523	7	112-42-5	1-Undecanol	Alcohol	0.05	fresh, waxy, rose, soapy, clean, cloth, floral, citrus
KMW0509	7	20307-84-0	Cyclohexene, 4-ethenyl-4-methyl-3-(1-methylethenyl)-1-(1-methylethyl)-, (3R-trans)-	Terpenoids	-	sweet, herbal, woody
D255	7	2379-55-7	Quinoxaline, 2,3-dimethyl-	Heterocyclic compound	-	fatty, earthy
D102	7	1009-14-9	1-Pentanone, 1-phenyl-	Ketone	-	balsamic, valerian
D125	7	102-13-6	Benzeneacetic acid, 2-methylpropyl ester	Ester	-	sweet, floral, honey, chocolate, amber
D156	7	103-58-2	Propanoic acid, 2-methyl-, 3-phenylpropyl ester	Ester	-	fruity, tropical, apricot, plum, balsamic, jammy, honey, bread, osmanthus, dry
D152	7	103-48-0	Propanoic acid, 2-methyl-, 2-phenylethyl ester	Ester	-	floral, fruity, rose, tea, rose, peach, pastry
D74	7	100-06-1	4-Acetylanisole	Ketone	-	sweet, hawthorn, anisic, balsamic, acacia
GMW0246	7	122-43-0	Benzeneacetic acid, butyl ester	Ester	-	rose, honey, chocolate
GMW0159	7	10521-91-2	Benzenepentanol	Alcohol	-	floral, carnation, rose, lemon, verbena
WAMW0426	7	112-55-0	1-Dodecanethiol	Alcohol	-	skunk, cooked meat
QWMW0808	7	512-61-8	Tricyclo[2.2.1.0(2,6)]heptane, 1,7-dimethyl-7-(4-methyl-3-pentenyl)-, (-)-	Terpenoids	-	sweet, woody
WMW0220	7	1135-66-6	2H-2,4a-Methanonaphthalene, 1,3,4,5,6,7-hexahydro-1,1,5,5-tetramethyl-, (2S)-	Terpenoids	-	woody, dusty, amber, incense
WMW0217	7	13019-16-4	2-Octenal, 2-butyl-	Aldehyde	-	aldehydic, green, watery, fruity, metallic, oily, tropical, fatty, sweaty, goaty
WAMW2027	7	74962-98-4	2-Tridecen-1-ol, (E)-	Alcohol	-	mild, waxy, clean, watery, cilantro, rue, citrus peel, laundered cloth, fatty
NMW0164	7	4043-71-4	Benzene, 1,2-(methylenedioxy)-4-propenyl-, (E)-	Ether	-	-
NMW0161	7	122-72-5	3-Phenyl-1-propanol, acetate	Ester	0.1	sweet, balsamic, storax, spicy, cinnamon
NMW0143	7	579-66-8	Benzenamine, 2,6-diethyl-	Amine	-	-
NMW0135	7	3012-37-1	Thiocyanic acid, phenylmethyl ester	Sulfur compounds	0.005	-
NMW0171	7	122-59-8	Acetic acid, phenoxy-	Acid	-	sour, sweet
NMW0175	7	80-46-6	Phenol, 4-(1,1-dimethylpropyl)-	Phenol	0.8	-
NMW0176	7	103-81-1	Benzeneacetamide	Amine	-	-
NMW0183	7	623-05-2	Benzenemethanol, 4-hydroxy-	Alcohol	-	fruity, bitter, almond, sweet, coconut
NMW0177	7	6343-54-0	N-Benzylformamide	Amine	-	-
QWMW0661	7	95-41-0	2-Hexyl-2-cyclopenten-1-one	Ketone	-	sweet, herbal, jasmine, sweet, waxy, floral, fruity
QWMW0712	7	7335-26-4	Benzoic acid, 2-methoxy-, ethyl ester	Ester	-	sweet, floral, fruity, raspberry, grape, ylang-ylang
XMW0382*054	7	95910-36-4	isoledene	Terpenoids	-	-
XMW1412*054	7	65354-33-8	2-Epi-.alpha.-funebrene	Terpenoids	-	-
XMW0249*066	7	16728-99-7	Naphthalene, 1,2,3,4,4a,7-hexahydro-1,6-dimethyl-4-(1-methylethyl)-	Terpenoids	-	-
NMW0194*057	7	103-54-8	Acetic acid, cinnamyl ester	Ester	0.15	sweet, floral, spicy, balsamic, cinnamon
XMW0980*143	7	94482-89-0	(1R,3aR,4aR,8aR)-1,4,4,6-Tetramethyl-1,2,3,3a,4,4a,7,8-octahydrocyclopenta[1,4]cyclobuta[1,2]benzene	Terpenoids	-	-
D147*110	7	103-38-8	Butanoic acid, 3-methyl-, phenylmethyl ester	Ester	0.01	sweet, fruity, apple, pineapple, herbal
XMW0463*110	7	10361-39-4	Pentanoic acid, phenylmethyl ester	Ester	-	fruity, floral, apple skin
KMW0516*081	7	80-26-2	.alpha.-Terpinyl acetate	Ester	2.5	herbal, bergamot, lavender, lime, citrus
WAMW2239*241	7	95-20-5	1H-Indole, 2-methyl-	Heterocyclic compound	-	animalic, indole, skatole
XMW1097*355	7	84434-19-5	Hexanoic acid, 3-hexenyl ester	Ester	-	-
XMW0743*427	7	6831-16-9	(-)-Aristolene	Terpenoids	-	-
GMW0395*056	7	79120-98-2	(3R,3aR,7R,8aS)-3,8,8-Trimethyl-6-methyleneoctahydro-1H-3a,7-methanoazulene	Terpenoids	-	-
XMW0380*056	7	17334-55-3	1H-Cyclopropa[a]naphthalene, 1a,2,3,5,6,7,7a,7b-octahydro-1,1,7,7a-tetramethyl-, [1aR-(1a.alpha.,7.alpha.,7a.alpha.,7b.alpha.)]-	Terpenoids	-	-
D185*413	7	150-13-0	4-Aminobenzoic acid	Acid	4110	-
KMW0704*357	8	21391-99-1	.alpha.-Calacorene	Terpenoids	-	woody
NMW0023*217	8	529-20-4	Benzaldehyde, 2-methyl-	Aldehyde	0.0096	mild floral, sweet
KMW0701*135	8	1209-71-8	2-Naphthalenemethanol, 1,2,3,4,4a,5,6,7-octahydro-.alpha.,.alpha.,4a,8-tetramethyl-, (2R-cis)-	Terpenoids	-	waxy, sweet
KMW0626*065	8	483-77-2	Naphthalene, 1,2,3,4-tetrahydro-1,6-dimethyl-4-(1-methylethyl)-, (1S-cis)-	Terpenoids	-	herbal, spice
KMW0644*118	8	6750-60-3	1H-Cycloprop[e]azulen-7-ol, decahydro-1,1,7-trimethyl-4-methylene-, [1ar-(1a.alpha.,4a.alpha.,7.beta.,7a.beta.,7b.alpha.)]-	Terpenoids	-	earthy, herbal, fruity
KMW0595*084	8	495-60-3	1,3-Cyclohexadiene, 5-(1,5-dimethyl-4-hexenyl)-2-methyl-, [S-(R*,S*)]-	Terpenoids	-	spice, fresh, sharp
KMW0582*151	8	88-84-6	.beta.-Guaiene	Terpenoids	-	sweet, woody, dry, guaiacwood, spicy, powdery
XMW0157*063	8	39020-72-9	(2R,3R,6S)-6-Isopropyl-3-methyl-2-(prop-1-en-2-yl)-3-vinylcyclohexanone	Terpenoids	-	-
XMW0216*063	8	21698-44-2	(2S,3S,6S)-6-Isopropyl-3-methyl-2-(prop-1-en-2-yl)-3-vinylcyclohexanone	Terpenoids	-	-
XMW0033*143	8	94535-52-1	(1R,3aS,4aS,8aS)-1,4,4,6-Tetramethyl-1,2,3,3a,4,4a,7,8-octahydrocyclopenta[1,4]cyclobuta[1,2]benzene	Terpenoids	-	-
NMW0268*302	8	583-17-5	2-Propenoic acid, 3-(2-hydroxyphenyl)-	Acid	25	-
XMW0842*458	8	5986-49-2	4aH-Cycloprop[e]azulen-4a-ol, decahydro-1,1,4,7-tetramethyl-, [1aR-(1a.alpha.,4.beta.,4a.beta.,7.alpha.,7a.beta.,7b.alpha.)]-	Terpenoids	-	-
XMW0477	8	79474-35-4	Benzoic acid, 2-fluoro-4,5-dimethoxy-	Acid	-	-
XMW0391	8	193615-07-5	3,5,11-Eudesmatriene	Terpenoids	-	-
XMW0639	8	74708-73-9	1,4-Methanobenzocyclodecene, 1,2,3,4,4a,5,8,9,12,12a-decahydro-	Terpenoids	-	-
XMW0665	8	257293-90-6	Muurola-4,10(14)-dien-1.beta.-ol	Terpenoids	-	-
XMW0392	8	20129-39-9	.alpha.-Corocalene	Terpenoids	-	-
w10	8	1604-34-8	2-Undecanone, 6,10-dimethyl-	Ketone	-	dry, musty
XMW0139	8	489-77-0	6-Isopropyl-1,4-dimethylnaphthalene	Aromatics	-	-
XMW0140	8	483-78-3	Naphthalene, 1,6-dimethyl-4-(1-methylethyl)-	Terpenoids	-	-
XMW0049	8	88725-82-0	2,4,4-Trimethyl-3-(3-methylbutyl)cyclohex-2-enone	Ketone	-	-
w44	8	7492-70-8	Butanoic acid, 2-butoxy-1-methyl-2-oxoethyl ester	Ester	-	creamy, buttery, buttermilky, dairy, cheese
XMW0260	8	1560-92-5	Hexadecane, 2-methyl-	Hydrocarbons	-	-
YZMW0657	8	771-03-9	2H-Pyran-2-one, 3-acetyl-4-hydroxy-6-methyl-	Acid	0.37	-
XMW0250	8	1671-77-8	1-Pentanone, 1-(4-methylphenyl)-	Ketone	-	-
YZMW0001	8	100-02-7	Phenol, 4-nitro-	Phenol	2.3	-
XMW1334	8	6314-97-2	Benzene, (2,2-diethoxyethyl)-	Ether	13.1864	-
YZMW0007	8	1007-36-9	Urea, N-methyl-N'-phenyl-	Nitrogen compounds	450	-
XMW2233	8	105-91-9	2,6-Octadien-1-ol, 3,7-dimethyl-, propanoate, (Z)-	Ester	-	fruity, floral, green, jammy, berry
XMW0740	8	20321-99-7	3-Methyl-pyrrolo(2,3-b)pyrazine	Heterocyclic compound	-	-
YZMW0268	8	3428-24-8	1,2-Benzenediol, 4,5-dichloro-	Alcohol	3.5	-
XMW0827	8	249629-60-5	Coumarin, 3,4-dihydro-4,4,6,8-tetramethyl-	Heterocyclic compound	-	-
XMW1171	8	1655-69-2	Benzene, 1-methoxy-4-phenoxy-	Ether	-	-
XMW1018	8	2201-24-3	1-Phenylcyclohexylamine	Amine	-	-
XMW1014	8	54484-70-7	5-Pyrimidinamine, 2-chloro-4-ethoxy-	Heterocyclic compound	-	-
KMW0708	8	123123-38-6	7-epi-a-Eudesmol	Terpenoids	-	sweet, woody
KMW0640	8	124-25-4	Tetradecanal	Aldehyde	0.06	fatty, waxy, amber, incense, dry, citrus, peel, musky
KMW0634	8	5273-85-8	Benzene, 1,2,3-trimethoxy-5-(1-propenyl)-, (E)-	Ether	-	spicy, flowery
KMW0631	8	489-86-1	Guaiol	Terpenoids	-	woody, balsamic
D227	8	25013-16-5	Phenol, (1,1-dimethylethyl)-4-methoxy- (CAS)	Phenol	-	mild, rubbery
D215	8	887-08-1	Daucol	Terpenoids	-	-
D274	8	2445-82-1	2H-1-Benzopyran-2-one, 3-methyl-	Ketone	-	-
D325	8	288249-25-2	(3R,3aR,7S,8aS)-3,6,8,8-Tetramethyl-4,7,8,8a-tetrahydro-1H-3a,7-methanoazulen-2(3H)-one	Terpenoids	-	-
D320	8	28446-26-6	(3E,7E)-1,5,5,8-Tetramethylcycloundeca-3,7-dienol	Terpenoids	-	-
D319	8	28400-11-5	.beta.-Acorenol	Terpenoids	-	-
D337	8	29597-36-2	2H-2a,7-Methanoazuleno[5,6-b]oxirene, octahydro-3,6,6,7a-tetramethyl-	Terpenoids	-	-
GGMW0193	8	108-59-8	Propanedioic acid, dimethyl ester	Ester	4360	-
D99	8	10072-05-6	Benzoic acid, 2-(dimethylamino)-, methyl ester	Ester	-	fruity, orange, leafy, petitgrain
GMW0223	8	1131-62-0	Ethanone, 1-(3,4-dimethoxyphenyl)-	Ketone	-	sweet, woody, floral
D352	8	3155-71-3	2-Butenal, 2-methyl-4-(2,6,6-trimethyl-1-cyclohexen-1-yl)-	Aldehyde	-	dry, sweet, tobacco, nutty, violet, boronia, dry leaf, hay, woody, acorn
QWMW0901	8	16429-21-3	2-Oxepanone, 7-hexyl-	Ketone	-	peach, apricot, milky, fatty
WMW0148	8	24048-44-0	Spiro[4.5]dec-7-ene, 1,8-dimethyl-4-(1-methylethenyl)-, [1S-(1.alpha.,4.beta.,5.alpha.)]-	Terpenoids	-	-
WMW0230	8	23811-08-7	Hinesol	Terpenoids	-	spicy, peppery, woody
WAMW0949	8	2305-05-7	γ-Dodecalactone	Ester	0.00043	fatty, peachy, musky
NMW0269	8	1081-75-0	Benzene, 1,1'-(1,3-propanediyl)bis-	Aromatics	-	-
NMW0252	8	20493-56-5	(5R,6R)-3,6-Dimethyl-5-(prop-1-en-2-yl)-6-vinyl-6,7-dihydrobenzofuran-4(5H)-one	Terpenoids	-	-
NMW0235	8	66-77-3	1-Naphthalenecarboxaldehyde	Aldehyde	3.6	-
NMW0270	8	119-61-9	Benzophenone	Ketone	-	balsamic, rose, metallic, powdery, geranium
NMW0277	8	52946-22-2	(S)-4-(1-Acetoxyallyl)phenyl acetate	Ester	-	-
NMW0296	8	523-80-8	Apiol	Heterocyclic compound	610	parsley, faint
NMW0295	8	125-40-6	Butabarbital	Heterocyclic compound	-	-
NMW0196	8	1732-09-8	Octanedioic acid, dimethyl ester	Ester	-	-
NMW0027*217	8	620-23-5	Benzaldehyde, 3-methyl-	Aldehyde	0.6	sweet, fruity, cherry, benzaldehyde, phenol
KMW0693*135	8	15051-81-7	10-epi-.gamma.-Eudesmol	Terpenoids	-	sweet, woody, floral
WMW0021*065	8	73209-42-4	trans-Calamenene	Terpenoids	-	-
XMW0386*065	8	72937-55-4	cis-Calamenene	Terpenoids	-	-
XMW1035*118	8	77171-55-2	(-)-Spathulenol	Terpenoids	-	honey
XMW0131*143	8	50894-66-1	Di-epi-.alpha.-cedrene	Terpenoids	-	-
WMW0013*151	8	54324-03-7	Bicyclosesquiphellandrene	Terpenoids	-	-
NMW0271*302	8	7400-08-0	p-Coumaric acid	Acid	23	-
