# Supplementary material for: Untargeted metabolomics based on HS- SPME-GC-MS revealing the dynamic evolution of aroma components during cigar aging
Source: Front Plant Sci. 2025 Sep 15;16:1657415. doi: 10.3389/fpls.2025.1657415 (PMC12477199; doi:10.3389/fpls.2025.1657415)
Supplement: Supplementary file 9 [file Table9.xlsx]

## Sheet: Sheet1
Supplementary Table 9.Relative Odor Activity Value (rOAV) analysis results of volatile metabolites.
Index	Compounds	Class I	Formula	CAS	Odor	Threshold	S0-1	S0-2	S0-3	S0-4	S0-5	S0-6	S1-1	S1-2	S1-3	S1-4	S1-5	S1-6	S2-1	S2-2	S2-3	S2-4	S2-5	S2-6	S3-1	S3-2	S3-3	S3-4	S3-5	S3-6	S4-1	S4-2	S4-3	S4-4	S4-5	S4-6	S5-1	S5-2	S5-3	S5-4	S5-5	S5-6
w48*025	2H-Pyran, tetrahydro-4-methyl-2-(2-methyl-1-propenyl)-	Terpenoids	C10H18O	16409-43-1	sweet, floral, aromatic, rose, fresh, bay, leafy	0.0002	71.4554	67.9133	65.6053	63.6538	65.9364	68.0308	61.611	59.4687	57.4777	56.1562	58.9772	55.4192	61.4615	68.0982	56.1357	59.4264	59.396	64.4862	60.1642	53.9005	80.8183	66.2178	58.4933	58.2341	38.0825	38.2008	33.3583	44.9642	36.3183	36.2642	36.4589	35.5098	37.2619	35.4644	35.2904	35.7569
KMW0597*061	.gamma.-Muurolene	Terpenoids	C15H24	30021-74-0	herbal, woody, spice	-	-	-	-	-	-	-	-	-	-	-	-	-	-	-	-	-	-	-	-	-	-	-	-	-	-	-	-	-	-	-	-	-	-	-	-	-
KMW0704*357	.alpha.-Calacorene	Terpenoids	C15H20	21391-99-1	woody	-	-	-	-	-	-	-	-	-	-	-	-	-	-	-	-	-	-	-	-	-	-	-	-	-	-	-	-	-	-	-	-	-	-	-	-	-
XMW1182*054	Di-epi-.alpha.-cedrene-(I)	Terpenoids	C15H24	21996-77-0	-	-	-	-	-	-	-	-	-	-	-	-	-	-	-	-	-	-	-	-	-	-	-	-	-	-	-	-	-	-	-	-	-	-	-	-	-	-
KMW0718*070	5,9,13-Pentadecatrien-2-one, 6,10,14-trimethyl-, (E,E)-	Ketone	C18H30O	1117-52-8	flowery, ether	-	-	-	-	-	-	-	-	-	-	-	-	-	-	-	-	-	-	-	-	-	-	-	-	-	-	-	-	-	-	-	-	-	-	-	-	-
XMW1170*142	Butanoic acid, 2-methyl-, 3,7-dimethyl-2,6-octadienyl ester, (Z)-	Ester	C15H26O2	51117-19-2	-	-	-	-	-	-	-	-	-	-	-	-	-	-	-	-	-	-	-	-	-	-	-	-	-	-	-	-	-	-	-	-	-	-	-	-	-	-
XMW1169*142	Butanoic acid, 2-methyl-, 3,7-dimethyl-2,6-octadienyl ester, (E)-	Ester	C15H26O2	68705-63-5	fruity, apple, rose	-	-	-	-	-	-	-	-	-	-	-	-	-	-	-	-	-	-	-	-	-	-	-	-	-	-	-	-	-	-	-	-	-	-	-	-	-
NMW0005*120	3-Cyclohexen-1-ol, 4-methyl-1-(1-methylethyl)-, (R)-	Terpenoids	C10H18O	20126-76-5	-	1.19	0.00617667	0.00595568	0.00540634	0.00666033	0.00691867	0.00549272	0.00399252	0.00638121	0.00473637	0.00515302	0.00490632	0.00486777	0.00338257	0.00406015	0.0041086	0.00682405	0.00530158	0.00573717	0.00410341	0.0054022	0.0063247	0.00522148	0.00627695	0.00541735	0.00074331	0.000817297	0.000774727	0.00082718	0.000790841	0.000822027	0.00524357	0.00565414	0.00750209	0.0056959	0.00605127	0.00532753
NMW0007*140	2,4-Cycloheptadien-1-one, 2,6,6-trimethyl-	Terpenoids	C10H14O	503-93-5	minty	-	-	-	-	-	-	-	-	-	-	-	-	-	-	-	-	-	-	-	-	-	-	-	-	-	-	-	-	-	-	-	-	-	-	-	-	-
XMW1142*040	.alpha.-Thujenal	Aldehyde	C10H14O	57129-54-1	-	-	-	-	-	-	-	-	-	-	-	-	-	-	-	-	-	-	-	-	-	-	-	-	-	-	-	-	-	-	-	-	-	-	-	-	-	-
NMW0023*217	Benzaldehyde, 2-methyl-	Aldehyde	C8H8O	529-20-4	mild floral, sweet	0.0096	1.45	1.56942	1.26236	1.45366	1.45125	1.45904	0.709733	0.742208	0.648199	0.698993	0.513883	0.699386	1.48564	1.36238	1.55289	1.66271	1.67892	1.78281	1.33204	1.28695	1.50552	1.50601	1.5729	1.45933	2.41781	2.55536	2.5204	2.40207	2.41324	2.47381	2.9481	2.80143	2.67492	3.19622	2.9564	3.16252
NMW0034*400	Fenchone	Terpenoids	C10H16O	1195-79-5	herbal, cedar leaf, bitter, thuja, camphor, earthy, woody	2.3	0.0384497	0.0386745	0.0380752	0.0373936	0.0371317	0.0369591	0.0361753	0.0414001	0.0354821	0.0365909	0.0351469	0.0349422	0.025205	0.0260372	0.0268125	0.0255335	0.026664	0.0283256	0.0285063	0.0266276	0.0288208	0.0299082	0.0273553	0.0277065	0.0176416	0.0191942	0.0190088	0.0191875	0.019858	0.0181513	0.0215217	0.0218794	0.0208968	0.022833	0.0232199	0.0235226
XMW1123*411	Benzene, 2-ethyl-1,4-dimethyl-	Aromatics	C10H14	1758-88-9	-	-	-	-	-	-	-	-	-	-	-	-	-	-	-	-	-	-	-	-	-	-	-	-	-	-	-	-	-	-	-	-	-	-	-	-	-	-
XMW1116*183	4-Hexen-1-ol, (E)-	Alcohol	C6H12O	928-92-7	green, herbal, musty, tomato, metallic	0.11	0.245	0.237028	0.244824	0.207252	0.215649	0.218172	0.254868	0.241894	0.249964	0.259324	0.249324	0.211737	0.183998	0.218328	0.146358	0.157906	0.164301	0.190455	0.183934	0.155746	0.20153	0.194887	0.184469	0.177482	0.175608	0.205578	0.185393	0.190377	0.202727	0.201086	0.25126	0.262745	0.238953	0.257578	0.284836	0.289402
NMW0065*092	Bicyclo[2.2.1]heptan-2-ol, 1,7,7-trimethyl-, (1S-endo)-	Terpenoids	C10H18O	464-45-9	pine, woody, camphor	0.048	1.62899	2.07367	1.94129	2.01437	1.79139	1.58087	1.25235	1.40643	1.05828	1.09088	1.10543	1.12552	0.859975	0.856471	1.00279	0.900291	0.894612	0.904317	0.942523	0.799898	0.930697	1.04933	0.970303	1.01599	0.669061	0.7882	0.752611	0.781419	0.764432	0.770057	0.917873	0.904087	0.894517	0.946521	1.02707	0.949559
NMW0075*093	Cyclohexanol, 1-methyl-4-(1-methylethylidene)-	Terpenoids	C10H18O	586-81-2	terpineol, lilac	-	-	-	-	-	-	-	-	-	-	-	-	-	-	-	-	-	-	-	-	-	-	-	-	-	-	-	-	-	-	-	-	-	-	-	-	-
NMW0078*258	Benzene, 1-methyl-3-nitro-	Nitrogen compounds	C7H7NO2	99-08-1	-	0.25	0.318487	0.309674	0.285138	0.328264	0.303669	0.305773	0.265994	0.271445	0.233398	0.261091	0.298303	0.246795	0.235796	0.24528	0.235303	0.252015	0.250181	0.273408	0.212352	0.240577	0.229769	0.214355	0.199982	0.212952	0.141083	0.161231	0.118359	0.122383	0.122829	0.122861	0.138313	0.105099	0.0996601	0.11395	0.11819	0.11139
NMW0083*258	Benzene, 1-methyl-4-nitro-	Nitrogen compounds	C7H7NO2	99-99-0	-	0.003	7.22334	8.06043	8.67765	8.92622	8.78138	8.21325	6.30299	7.18802	5.87148	6.15194	6.33731	6.79884	7.52917	6.34942	5.78665	6.31318	6.50318	7.1763	7.20256	6.72978	9.40701	7.75701	8.00613	7.62651	6.06009	6.72833	6.29936	5.94762	6.22377	5.9609	8.14404	8.13264	8.01289	9.902	9.32972	8.77129
KMW0701*135	2-Naphthalenemethanol, 1,2,3,4,4a,5,6,7-octahydro-.alpha.,.alpha.,4a,8-tetramethyl-, (2R-cis)-	Terpenoids	C15H26O	1209-71-8	waxy, sweet	-	-	-	-	-	-	-	-	-	-	-	-	-	-	-	-	-	-	-	-	-	-	-	-	-	-	-	-	-	-	-	-	-	-	-	-	-
KMW0686*322	2-Propenoic acid, 3-phenyl-, ethyl ester, (E)-	Ester	C11H12O2	4192-77-2	floral, honey, balsamic	0.0007	29.908	32.7493	29.1017	33.3756	31.8628	33.4323	37.8909	39.0403	36.4597	39.6591	38.7066	40.5248	43.3147	47.0035	44.4123	47.6456	43.4379	46.0915	57.5795	63.3193	83.7998	58.0051	58.3664	65.0315	84.4674	90.2348	83.7623	94.0154	84.8104	88.9123	85.8573	88.2295	90.6243	88.1285	81.219	84.1343
KMW0679*301	2-Propenoic acid, 3-phenyl-, methyl ester, (E)-	Ester	C10H10O2	1754-62-7	sweet, balsamic, strawberry, cherry	-	-	-	-	-	-	-	-	-	-	-	-	-	-	-	-	-	-	-	-	-	-	-	-	-	-	-	-	-	-	-	-	-	-	-	-	-
XMW1310*106	Isobutyl isovalerate	Ester	C9H18O2	589-59-3	sweet, fruity, apple, raspberry, green, banana	0.034	0.0527552	0.0606008	0.0663092	0.098633	0.0708299	0.0812906	0.0668993	0.0734877	0.0859159	0.0786798	0.0783226	0.0633065	0.0678401	0.0743056	0.151775	0.109625	0.0869153	0.0687943	0.0819768	0.118297	0.0736155	0.0943036	0.074676	0.0701975	0.0737578	0.0634685	0.0819334	0.0784476	0.0808805	0.0927294	0.0912055	0.127763	0.109538	0.124954	0.150304	0.123456
KMW0606*061	.alpha.-Muurolene	Terpenoids	C15H24	10208-80-7	woody	-	-	-	-	-	-	-	-	-	-	-	-	-	-	-	-	-	-	-	-	-	-	-	-	-	-	-	-	-	-	-	-	-	-	-	-	-
KMW0614*066	Cubenene	Terpenoids	C15H24	29837-12-5	spicy, fruity, mango	-	-	-	-	-	-	-	-	-	-	-	-	-	-	-	-	-	-	-	-	-	-	-	-	-	-	-	-	-	-	-	-	-	-	-	-	-
KMW0616*152	Naphthalene, 1,2,3,4,4a,5,6,8a-octahydro-7-methyl-4-methylene-1-(1-methylethyl)-, (1.alpha.,4a.beta.,8a.alpha.)-	Terpenoids	C15H24	39029-41-9	herbal, woody	-	-	-	-	-	-	-	-	-	-	-	-	-	-	-	-	-	-	-	-	-	-	-	-	-	-	-	-	-	-	-	-	-	-	-	-	-
KMW0617*378	Cyclohexanemethanol, 4-ethenyl-.alpha.,.alpha.,4-trimethyl-3-(1-methylethenyl)-, [1R-(1.alpha.,3.alpha.,4.beta.)]-	Terpenoids	C15H26O	639-99-6	green, woody, spicy, rose	0.1	0.161359	0.190558	0.165291	0.205291	0.178025	0.180225	0.152278	0.180645	0.130333	0.146663	0.138858	0.145482	0.164118	0.163482	0.187411	0.212528	0.169363	0.167084	0.187901	0.228499	0.285213	0.199805	0.210274	0.225658	0.237682	0.251133	0.238958	0.27134	0.268183	0.238841	0.295467	0.295431	0.309044	0.293937	0.313774	0.295956
KMW0618*064	δ-cadinene	Terpenoids	C15H24	483-76-1	thyme, herbal, woody, dry	0.0015	68.0268	70.1599	63.4864	72.3639	69.746	66.9032	222.703	225.662	204.21	213.53	204.819	222.563	452.473	473.959	494.747	541.988	461.504	491.728	760.975	846.63	1178.98	827.446	811.234	864.528	1841.66	1958.63	1826.44	2027.77	1903.44	1896.2	1965.63	1938.39	1988.17	1952.99	1862.15	1907.13
KMW0624*381	Cis-Nerolidol	Terpenoids	C15H26O	3790-78-1	waxy, floral	64	0.000172437	0.000188575	0.00018093	0.000190069	0.000174335	0.000172096	0.00032142	0.000286107	0.000283382	0.00029549	0.000269958	0.000299854	0.000540833	0.000561307	0.00060827	0.000631759	0.000534683	0.000586472	0.000774028	0.000889819	0.00124295	0.000877895	0.000815345	0.000891933	0.00196781	0.00210109	0.00197922	0.00219532	0.00203253	0.00201395	0.00265795	0.00257077	0.00260698	0.00260399	0.00244934	0.0024721
KMW0626*065	Naphthalene, 1,2,3,4-tetrahydro-1,6-dimethyl-4-(1-methylethyl)-, (1S-cis)-	Terpenoids	C15H22	483-77-2	herbal, spice	-	-	-	-	-	-	-	-	-	-	-	-	-	-	-	-	-	-	-	-	-	-	-	-	-	-	-	-	-	-	-	-	-	-	-	-	-
KMW0630*381	1,6,10-Dodecatrien-3-ol, 3,7,11-trimethyl-, (E)-	Terpenoids	C15H26O	40716-66-3	floral, green, citrus, woody, waxy	0.25	0.665902	0.765231	0.719555	0.841982	0.789142	0.804428	0.662157	0.739388	0.617709	0.644378	0.649819	0.678891	0.678886	0.684108	0.757357	0.822578	0.719109	0.691568	0.771132	0.903619	1.23569	0.817548	0.86234	0.928234	0.648426	0.699226	0.656532	0.740901	0.727271	0.682732	0.748506	0.731285	0.760393	0.767415	0.746946	0.744154
KMW0673*380	.alpha.-Cadinol	Terpenoids	C15H26O	481-34-5	herbal, woody	-	-	-	-	-	-	-	-	-	-	-	-	-	-	-	-	-	-	-	-	-	-	-	-	-	-	-	-	-	-	-	-	-	-	-	-	-
KMW0638*142	Geranyl isovalerate	Ester	C15H26O2	109-20-6	green, fruity, apple, blueberry, pineapple	-	-	-	-	-	-	-	-	-	-	-	-	-	-	-	-	-	-	-	-	-	-	-	-	-	-	-	-	-	-	-	-	-	-	-	-	-
KMW0644*118	1H-Cycloprop[e]azulen-7-ol, decahydro-1,1,7-trimethyl-4-methylene-, [1ar-(1a.alpha.,4a.alpha.,7.beta.,7a.beta.,7b.alpha.)]-	Terpenoids	C15H24O	6750-60-3	earthy, herbal, fruity	-	-	-	-	-	-	-	-	-	-	-	-	-	-	-	-	-	-	-	-	-	-	-	-	-	-	-	-	-	-	-	-	-	-	-	-	-
KMW0645*133	Levomenol	Terpenoids	C15H26O	23089-26-1	fruity, nutty, coconut	-	-	-	-	-	-	-	-	-	-	-	-	-	-	-	-	-	-	-	-	-	-	-	-	-	-	-	-	-	-	-	-	-	-	-	-	-
KMW0650*382	β-CARYOPHYLLENE ALCOHOL	Terpenoids	C15H26O	472-97-9	warm, woody, moss, spicy, earthy	-	-	-	-	-	-	-	-	-	-	-	-	-	-	-	-	-	-	-	-	-	-	-	-	-	-	-	-	-	-	-	-	-	-	-	-	-
KMW0655*379	5-Azulenemethanol, 1,2,3,3a,4,5,6,7-octahydro-.alpha.,.alpha.,3,8-tetramethyl-, [3S-(3.alpha.,3a.beta.,5.alpha.)]-	Terpenoids	C15H26O	22451-73-6	spicy	-	-	-	-	-	-	-	-	-	-	-	-	-	-	-	-	-	-	-	-	-	-	-	-	-	-	-	-	-	-	-	-	-	-	-	-	-
KMW0661*133	.alpha.-Bisabolol	Terpenoids	C15H26O	515-69-5	mild, floral, peppery, balsamic, clean	-	-	-	-	-	-	-	-	-	-	-	-	-	-	-	-	-	-	-	-	-	-	-	-	-	-	-	-	-	-	-	-	-	-	-	-	-
KMW0672*289	Naphthalene, 2,6-dimethyl-	Aromatics	C12H12	581-42-0	grassy	0.01	9.11694	9.60464	9.00228	10.0667	9.957	9.65933	8.93872	9.78674	8.18006	8.64472	8.14528	9.24398	8.59393	8.64353	9.22238	10.2512	9.04828	9.70588	11.3658	13.1934	19.4362	12.1593	12.3474	13.1555	6.83275	7.80307	6.66227	8.12057	7.32719	6.87536	8.08197	8.13587	8.83914	8.73561	8.33128	8.76665
NMW0089*116	6-Octen-1-ol, 3,7-dimethyl-, (R)-	Terpenoids	C10H20O	1117-61-9	citronella oil, rose, leafy, oily, petal	0.04	0.38045	0.555897	0.518726	0.41279	0.563239	0.622927	0.691036	0.857983	0.725211	0.743173	0.631247	0.766454	0.412782	0.368732	0.488264	0.45484	0.508967	0.500348	0.6677	0.620132	0.860362	0.790986	0.780175	0.746542	0.412824	0.602542	0.556079	0.614742	0.489871	0.660542	0.476166	0.424436	0.523078	0.545855	0.483709	0.539102
NMW0091*117	8-Azabicyclo[3.2.1]octan-3-ol, 8-methyl-, endo-	Alcohol	C8H15NO	120-29-6	-	-	-	-	-	-	-	-	-	-	-	-	-	-	-	-	-	-	-	-	-	-	-	-	-	-	-	-	-	-	-	-	-	-	-	-	-	-
NMW0097*117	8-Azabicyclo[3.2.1]octan-3-ol, 8-methyl-, exo-	Alcohol	C8H15NO	135-97-7	-	-	-	-	-	-	-	-	-	-	-	-	-	-	-	-	-	-	-	-	-	-	-	-	-	-	-	-	-	-	-	-	-	-	-	-	-	-
XMW0948*363	Valerena-4,7(11)-diene	Terpenoids	C15H24	351222-66-7	-	-	-	-	-	-	-	-	-	-	-	-	-	-	-	-	-	-	-	-	-	-	-	-	-	-	-	-	-	-	-	-	-	-	-	-	-	-
NMW0195*057	2-Propen-1-ol, 3-phenyl-, acetate, (E)-	Ester	C11H12O2	21040-45-9	sweet, floral, spicy, balsamic	0.002	6.41129	2.76408	1.86434	3.01592	6.61552	5.80074	4.56055	8.71176	8.23618	8.17093	7.80807	8.53058	11.4032	9.93055	10.962	12.7841	10.1941	11.7977	20.3008	22.2386	28.4055	20.317	20.6435	21.6765	28.9076	28.9041	26.6041	30.8033	28.4664	27.9453	27.6814	26.7045	28.6486	26.7757	24.7436	26.8729
NMW0198*431	Naphthalene, 1,2-dimethyl-	Aromatics	C12H12	573-98-8	-	-	-	-	-	-	-	-	-	-	-	-	-	-	-	-	-	-	-	-	-	-	-	-	-	-	-	-	-	-	-	-	-	-	-	-	-	-
NMW0200*147	1,6,10-Dodecatriene, 7,11-dimethyl-3-methylene-	Terpenoids	C15H24	77129-48-7	-	0.087	0.679745	0.641527	0.589919	0.647493	0.6352	0.633166	0.885632	0.93602	0.812662	0.852439	0.850079	0.893536	1.39734	1.48349	1.53883	1.71922	1.48638	1.53652	2.32469	2.69321	3.86033	2.55566	2.51485	2.70449	5.74236	6.00565	5.57351	6.26527	5.82553	5.9052	6.2101	5.91207	6.10087	6.05187	5.53837	5.76767
XMW0967*361	(1R,5S)-1,8-Dimethyl-4-(propan-2-ylidene)spiro[4.5]dec-7-ene	Terpenoids	C15H24	28400-12-6	-	-	-	-	-	-	-	-	-	-	-	-	-	-	-	-	-	-	-	-	-	-	-	-	-	-	-	-	-	-	-	-	-	-	-	-	-	-
NMW0206*363	(1R,9R,E)-4,11,11-Trimethyl-8-methylenebicyclo[7.2.0]undec-4-ene	Terpenoids	C15H24	68832-35-9	-	-	-	-	-	-	-	-	-	-	-	-	-	-	-	-	-	-	-	-	-	-	-	-	-	-	-	-	-	-	-	-	-	-	-	-	-	-
XMW0965*143	(1S,5S)-2-Methyl-5-((R)-6-methylhept-5-en-2-yl)bicyclo[3.1.0]hex-2-ene	Hydrocarbons	C15H24	159407-35-9	-	-	-	-	-	-	-	-	-	-	-	-	-	-	-	-	-	-	-	-	-	-	-	-	-	-	-	-	-	-	-	-	-	-	-	-	-	-
XMW0962*110	Butanoic acid, 2-methyl-, phenylmethyl ester	Ester	C12H16O2	56423-40-6	-	-	-	-	-	-	-	-	-	-	-	-	-	-	-	-	-	-	-	-	-	-	-	-	-	-	-	-	-	-	-	-	-	-	-	-	-	-
XMW0943*425	Undecane, 3,5-dimethyl-	Hydrocarbons	C13H28	17312-81-1	-	-	-	-	-	-	-	-	-	-	-	-	-	-	-	-	-	-	-	-	-	-	-	-	-	-	-	-	-	-	-	-	-	-	-	-	-	-
NMW0189*132	Ethanone, 1-(2-hydroxy-4-methoxyphenyl)-	Ketone	C9H10O3	552-41-0	-	-	-	-	-	-	-	-	-	-	-	-	-	-	-	-	-	-	-	-	-	-	-	-	-	-	-	-	-	-	-	-	-	-	-	-	-	-
NMW0227*137	(Z)-1-Methyl-4-(6-methylhept-5-en-2-ylidene)cyclohex-1-ene	Terpenoids	C15H24	13062-00-5	-	-	-	-	-	-	-	-	-	-	-	-	-	-	-	-	-	-	-	-	-	-	-	-	-	-	-	-	-	-	-	-	-	-	-	-	-	-
NMW0229*271	2-Naphthalenol	Phenol	C10H8O	135-19-3	-	3	0.0137038	0.0137625	0.0124663	0.0140905	0.0144611	0.0134604	0.0423362	0.0437009	0.0393473	0.0410737	0.0394037	0.0427773	0.0868081	0.0901605	0.0921859	0.102755	0.0895166	0.0942284	0.138738	0.157673	0.208008	0.146526	0.148058	0.156917	0.355048	0.377407	0.351316	0.38904	0.36619	0.366361	0.421107	0.411717	0.423797	0.417923	0.398096	0.404961
XMW0938*028	3-Nonen-5-yne, 4-ethyl-, (E)-	Hydrocarbons	C11H18	74744-60-8	-	-	-	-	-	-	-	-	-	-	-	-	-	-	-	-	-	-	-	-	-	-	-	-	-	-	-	-	-	-	-	-	-	-	-	-	-	-
XMW0937*348	(1R,5S,6R)-2,7,7-Trimethylbicyclo[3.1.1]hept-2-en-6-yl acetate	Ester	C12H18O2	67999-48-8	-	-	-	-	-	-	-	-	-	-	-	-	-	-	-	-	-	-	-	-	-	-	-	-	-	-	-	-	-	-	-	-	-	-	-	-	-	-
XMW0926*080	Ethanone, 1-(2,4-dimethylphenyl)-	Ketone	C10H12O	89-74-7	floral, woody, sweet, mimosa, minty	-	-	-	-	-	-	-	-	-	-	-	-	-	-	-	-	-	-	-	-	-	-	-	-	-	-	-	-	-	-	-	-	-	-	-	-	-
NMW0243*391	4-Methoxycinnamaldehyde	Aldehyde	C10H10O2	1963-36-6	spicy, cinnamon, sweet, cherry, vanilla, floral	-	-	-	-	-	-	-	-	-	-	-	-	-	-	-	-	-	-	-	-	-	-	-	-	-	-	-	-	-	-	-	-	-	-	-	-	-
NMW0188*446	2-Propenoic acid, 3-phenyl-	Acid	C9H8O2	621-82-9	balsamic, sweet, storax	-	-	-	-	-	-	-	-	-	-	-	-	-	-	-	-	-	-	-	-	-	-	-	-	-	-	-	-	-	-	-	-	-	-	-	-	-
NMW0107*238	Isoquinoline	Heterocyclic compound	C9H7N	119-65-3	sweet, balsamic, herbal, benzaldehyde, anisic	-	-	-	-	-	-	-	-	-	-	-	-	-	-	-	-	-	-	-	-	-	-	-	-	-	-	-	-	-	-	-	-	-	-	-	-	-
NMW0142*081	Cyclohexanol, 1-methyl-4-(1-methylethylidene)-, acetate	Ester	C12H20O2	10235-63-9	-	-	-	-	-	-	-	-	-	-	-	-	-	-	-	-	-	-	-	-	-	-	-	-	-	-	-	-	-	-	-	-	-	-	-	-	-	-
NMW0109*224	1,2-Benzenediol, 3-methyl-	Alcohol	C7H8O2	488-17-5	-	16	0.000746251	0.000759188	0.000722834	0.000700279	0.000888538	0.000688476	0.000725409	0.000726433	0.000693499	0.000738655	0.000659069	0.000651409	0.000552591	0.000733852	0.000672044	0.000616345	0.000405881	0.000541046	0.000601608	0.000557209	0.000915075	0.000669214	0.000370509	0.00050059	0.000165411	0.0001801	0.000184248	0.000228771	0.000207544	0.000144276	0.000262799	0.000271254	0.000218515	0.000396212	0.000272806	0.000256049
NMW0115*091	Anethole	Ether	C10H12O	104-46-1	sweet, exotic, flowery, stewed	0.015	3.41007	3.44285	3.19177	3.32036	3.45723	3.41375	3.45584	3.64284	3.0328	3.34526	2.98384	3.40758	3.60641	3.75442	3.89198	4.4049	4.04358	4.12267	3.74636	4.09928	6.17743	4.20869	4.41517	4.34791	2.45881	2.78035	2.66178	2.78932	2.6588	2.87581	2.96416	2.96868	3.07464	3.22866	3.16213	3.03625
NMW0120*045	Phenol, p-tert-butyl-	Phenol	C10H14O	98-54-4	oakmoss, leathery	0.8	0.0241443	0.0267843	0.0231111	0.0206953	0.024176	0.0279997	0.0211538	0.0289161	0.0159023	0.0229181	0.0230523	0.0259606	0.0239586	0.0165445	0.0213327	0.0386906	0.027131	0.0297064	0.0244457	0.00438204	0.0428516	0.0264904	0.0168214	0.0341274	0.0145781	0.0190431	0.0178452	0.0156397	0.0170834	0.0161238	0.0196828	0.0193271	0.0229626	0.0230527	0.0213459	0.0220342
NMW0122*338	Geranyl formate	Ester	C11H18O2	105-86-2	fresh, rose, neroli, tea, rose, green	0.2	0.153958	0.200131	0.175411	0.185798	0.195211	0.19607	0.176779	0.184969	0.169415	0.189331	0.162599	0.171266	0.169523	0.138942	0.181696	0.208006	0.171746	0.15895	0.167405	0.184268	0.227748	0.159821	0.162193	0.181331	0.182179	0.207313	0.187984	0.2002	0.186511	0.214383	0.199117	0.211386	0.127717	0.230466	0.213695	0.202086
NMW0126*047	2-Propen-1-ol, 3-phenyl-, (E)-	Alcohol	C9H10O	4407-36-7	sweet, balsamic, hyacinth, spicy, green, powdery, cinnamyl	2.8	0.00369668	0.00354532	0.00302905	0.00402384	0.00402571	0.00352251	0.000374871	0.000407931	0.00037735	0.000383955	0.000373509	0.000379294	0.00266351	0.00283249	0.00268205	0.00272052	0.00295506	0.0027044	0.0030497	0.00293767	0.00409826	0.00299574	0.00222622	0.00263415	0.00337934	0.00298939	0.00339997	0.0031388	0.00300012	0.00331241	0.000414089	0.000421815	0.000435038	0.000435093	0.000449214	0.000434128
XMW1069*313	Butanoic acid, 3-hexenyl ester, (E)-	Ester	C10H18O2	53398-84-8	-	-	-	-	-	-	-	-	-	-	-	-	-	-	-	-	-	-	-	-	-	-	-	-	-	-	-	-	-	-	-	-	-	-	-	-	-	-
NMW0141*052	2,7-Octadiene-1,6-diol, 2,6-dimethyl-, (E)-	Terpenoids	C10H18O2	75991-61-6	-	-	-	-	-	-	-	-	-	-	-	-	-	-	-	-	-	-	-	-	-	-	-	-	-	-	-	-	-	-	-	-	-	-	-	-	-	-
NMW0144*311	Neric acid	Terpenoids	C10H16O2	4613-38-1	-	-	-	-	-	-	-	-	-	-	-	-	-	-	-	-	-	-	-	-	-	-	-	-	-	-	-	-	-	-	-	-	-	-	-	-	-	-
NMW0149*311	Geranic acid	Terpenoids	C10H16O2	459-80-3	green	-	-	-	-	-	-	-	-	-	-	-	-	-	-	-	-	-	-	-	-	-	-	-	-	-	-	-	-	-	-	-	-	-	-	-	-	-
NMW0152*052	2,7-Octadiene-1,6-diol, 2,6-dimethyl-	Terpenoids	C10H18O2	64142-78-5	-	-	-	-	-	-	-	-	-	-	-	-	-	-	-	-	-	-	-	-	-	-	-	-	-	-	-	-	-	-	-	-	-	-	-	-	-	-
NMW0173*452	Benzoic acid, 2,6-dihydroxy-	Acid	C7H6O4	303-07-1	-	25	0.00198655	0.00210255	0.00193246	0.00211852	0.00201909	0.00200417	0.00180522	0.00199055	0.00172937	0.00182038	0.00162364	0.0017892	0.00150317	0.00148622	0.00159699	0.00167606	0.00160742	0.00167997	0.00198046	0.00215607	0.00267778	0.00208269	0.00209174	0.00220218	0.00149754	0.00158474	0.00157979	0.00168176	0.00152492	0.00159074	0.00145901	0.00143576	0.00137644	0.00150906	0.00149374	0.00156578
NMW0181*289	Naphthalene, 1,6-dimethyl-	Aromatics	C12H12	575-43-9	-	-	-	-	-	-	-	-	-	-	-	-	-	-	-	-	-	-	-	-	-	-	-	-	-	-	-	-	-	-	-	-	-	-	-	-	-	-
XMW0981*126	Butanoic acid, 3-methyl-, 2-phenylethyl ester	Ester	C13H18O2	140-26-1	floral, fruity, sweet, rose, peach, apricot	1e-05	73300.4	74024.5	73014.2	85888.7	79211.5	78735.5	66648.6	76380.5	65833.3	66325.4	62258.1	66255.1	61092.6	56731.8	71037.2	71642.4	66993.9	65880.5	77001.1	96358.9	75516.8	79519.2	81332.1	85979.7	82312.1	82137.5	77654.2	88935	78259.4	82088	92232.2	92295.5	94348.2	93347.2	101628	98393.6
KMW0603*061	Germacrene D	Terpenoids	C15H24	23986-74-5	woody, spice	0.0012	13.7418	13.7514	13.2888	15.8294	15.4508	15.5709	24.8583	26.8052	22.1992	25.2526	22.2425	24.9955	47.9682	50.752	50.3777	55.947	50.3096	54.0487	86.7625	100.375	135.001	94.0151	99.6975	107.311	195.325	208.693	190.05	209.657	202.627	200.114	276.536	272.051	269.421	269.737	253.325	261.316
KMW0596*059	Alloaromadendrene	Terpenoids	C15H24	25246-27-9	woody	-	-	-	-	-	-	-	-	-	-	-	-	-	-	-	-	-	-	-	-	-	-	-	-	-	-	-	-	-	-	-	-	-	-	-	-	-
KMW0230*229	3-Octen-2-one	Ketone	C8H14O	1669-44-9	earthy, spicy, herbal, sweet, mushroom, hay, blueberry	3e-05	4354.92	4470.85	4185.67	4339.04	4394.78	4290.91	4910.22	5444.08	4927.56	5101.25	4727.36	4839.52	3772.27	3394.02	3716.27	4022.96	3479.54	3399.02	3227.28	3389.8	3218.65	3382.91	3415.17	3446.84	2178.55	2534.44	2514.73	2576.57	2389.13	2482.74	3782.08	3701.36	3432.26	4001.06	3853.76	3788.18
KMW0595*084	1,3-Cyclohexadiene, 5-(1,5-dimethyl-4-hexenyl)-2-methyl-, [S-(R*,S*)]-	Terpenoids	C15H24	495-60-3	spice, fresh, sharp	-	-	-	-	-	-	-	-	-	-	-	-	-	-	-	-	-	-	-	-	-	-	-	-	-	-	-	-	-	-	-	-	-	-	-	-	-
KMW0313*112	Cyclohexanone, 5-methyl-2-(1-methylethyl)-, trans-	Terpenoids	C10H18O	89-80-5	minty	-	-	-	-	-	-	-	-	-	-	-	-	-	-	-	-	-	-	-	-	-	-	-	-	-	-	-	-	-	-	-	-	-	-	-	-	-
KMW0319*031	7-Oxabicyclo[4.1.0]heptane, 1-methyl-4-(1-methylethenyl)-	Terpenoids	C10H16O	1195-92-2	fresh, citrus, minty, spearmint, herbal	0.1	0.0802818	0.0784669	0.0853961	0.0704709	0.074525	0.0919119	0.0820756	0.0829188	0.0910536	0.0820994	0.0842259	0.0893627	0.0766204	0.0759003	0.0674891	0.0740164	0.0580762	0.0795292	0.0737949	0.0702376	0.105272	0.0882356	0.0890589	0.0814024	0.0362797	0.0419403	0.0357103	0.0396437	0.033836	0.0350405	0.0629281	0.0558749	0.054822	0.0567681	0.0595344	0.0502689
XMW2344*293	Quinoline, 2,4-dimethyl-	Heterocyclic compound	C11H11N	1198-37-4	-	-	-	-	-	-	-	-	-	-	-	-	-	-	-	-	-	-	-	-	-	-	-	-	-	-	-	-	-	-	-	-	-	-	-	-	-	-
KMW0327*031	Limonene oxide, trans-	Terpenoids	C10H16O	4959-35-7	fresh, citrus	0.25	0.297562	0.289995	0.287874	0.280421	0.286125	0.288782	0.232919	0.253599	0.227317	0.230172	0.218777	0.224318	0.205011	0.214138	0.19115	0.195563	0.216026	0.207628	0.208099	0.187568	0.219083	0.210798	0.206737	0.206071	0.0979225	0.116812	0.10695	0.108821	0.102328	0.117555	0.120675	0.118856	0.115375	0.128452	0.121589	0.128782
KMW0333*453	endo-fenchol	Alcohol	C10H18O	14575-74-7	camphor	-	-	-	-	-	-	-	-	-	-	-	-	-	-	-	-	-	-	-	-	-	-	-	-	-	-	-	-	-	-	-	-	-	-	-	-	-
KMW0338*263	2-Nonenal, (E)-	Aldehyde	C9H16O	18829-56-6	fatty, green, cucumber, aldehydic, citrus	8e-05	1327.27	1455.18	1582.87	1566.03	1539.74	1557.85	1307.14	1707.88	1254.09	1323.87	1230.75	1404.5	1396.09	1359.31	1575.94	1601.32	1605.65	1493.22	1336.64	1569.52	1540.13	1519.74	1476.57	1474.35	1191.04	1202.76	1169.49	1200.57	1293.85	1111.27	1149.05	944.231	1008.3	1068.76	993.397	991.246
KMW0342*396	Citronellal	Terpenoids	C10H18O	106-23-0	sweet, dry, floral, herbal, waxy, aldehydic, citrus	0.06	0.224668	0.260527	0.210809	0.241122	0.253838	0.255286	0.176051	0.259197	0.19236	0.206623	0.181004	0.206089	0.17936	0.190419	0.236547	0.265172	0.213095	0.182831	0.20127	0.242452	0.226183	0.230555	0.232665	0.207525	0.150881	0.181128	0.209928	0.198268	0.171129	0.165153	0.195195	0.166508	0.180341	0.195173	0.207977	0.179394
KMW0345*032	2,6-Nonadienal, (E,Z)-	Aldehyde	C9H14O	557-48-2	cucumber, green	1e-05	2280.27	2471.89	2263.58	2286.78	2547.57	2444.14	2307.98	2744.96	2663.61	2487.21	2471.62	2516.24	1711.57	1708.64	1602.77	1470.71	1777.41	1825.27	1881.97	1897.43	2038.71	2116.18	1894.64	1937.93	1229.55	1399.6	1436.59	1340.58	1143.59	1466.39	1599.53	1455.2	1584.55	1676.95	1517.4	1434.65
KMW0357*284	Bicyclo[2.2.1]heptan-2-ol, 2,3,3-trimethyl-	Terpenoids	C10H18O	465-31-6	menthol, musty, camphor	-	-	-	-	-	-	-	-	-	-	-	-	-	-	-	-	-	-	-	-	-	-	-	-	-	-	-	-	-	-	-	-	-	-	-	-	-
KMW0359*429	Phenol, 3-ethyl-	Phenol	C8H10O	620-17-7	musty	0.00085	59.5682	72.5393	73.0987	63.889	55.8923	67.729	44.4779	55.2978	26.6971	43.909	43.3387	48.787	158.859	54.5253	118.725	170.909	154.384	186.791	121.566	218.574	227.122	112.458	71.8042	195.667	70.1891	64.7872	66.0934	22.7755	79.8582	89.6033	60.61	117.614	144.755	115.349	122.148	132.457
KMW0360*095	Levomenthol	Terpenoids	C10H20O	2216-51-5	minty	0.9	0.014888	0.0167131	0.0171739	0.0154003	0.0186243	0.0164481	0.0149581	0.0161795	0.0157388	0.0164623	0.0143006	0.0165817	0.0152978	0.0183042	0.0148385	0.0143806	0.0189611	0.0180195	0.0248257	0.0217627	0.0288063	0.0257378	0.0300651	0.0255863	0.020947	0.0222992	0.0210502	0.0232617	0.022133	0.0237017	0.0222343	0.0206127	0.0203652	0.0226381	0.0210647	0.0196269
KMW0361*138	Benzaldehyde, 4-ethyl-	Aldehyde	C9H10O	4748-78-1	bitter, almond, sweet, anisic	0.12323	0.203323	0.225494	0.210495	0.213586	0.233605	0.218781	0.180299	0.209704	0.172889	0.190198	0.167981	0.168291	0.119939	0.139962	0.136298	0.146575	0.14149	0.15414	0.138601	0.150498	0.154849	0.139973	0.142087	0.155577	0.0991647	0.111366	0.106079	0.102352	0.114383	0.0920108	0.141898	0.125659	0.135765	0.138522	0.138461	0.138655
KMW0378*036	Ethanone, 1-(4-methylphenyl)-	Ketone	C9H10O	122-00-9	green, pea, bell pepper, galbanum	0.021	11.3346	12.1179	11.2288	11.8059	11.8371	11.6692	14.2773	15.9605	13.8133	14.4242	13.8897	14.0747	8.56757	8.87447	8.89426	9.22085	9.3176	9.3286	9.5093	9.59621	11.1574	10.0158	9.78185	9.76264	7.61743	8.33413	7.90949	8.1125	8.18998	7.97831	9.74734	9.9147	9.80455	10.3759	10.5887	10.746
XMW2429*059	Patchoulene	Terpenoids	C15H24	1405-16-9	-	-	-	-	-	-	-	-	-	-	-	-	-	-	-	-	-	-	-	-	-	-	-	-	-	-	-	-	-	-	-	-	-	-	-	-	-	-
KMW0303*301	2-Propenoic acid, 3-phenyl-, methyl ester	Ester	C10H10O2	103-26-4	sweet, balsamic, strawberry, cherry, cinnamon	0.011	0.615438	0.692665	0.580077	0.67932	0.641015	0.685502	0.793933	0.788735	0.713226	0.705331	0.739036	0.806002	0.812725	0.91834	0.924375	0.974528	0.902601	0.969403	1.40572	1.60406	2.24643	1.53673	1.55465	1.62711	1.78871	1.83943	1.75012	1.93717	1.69192	1.76081	1.80932	1.79252	1.85198	1.82937	1.61736	1.74504
KMW0299*025	trans-Rose oxide	Terpenoids	C10H18O	876-18-6	floral	0.0005	41.1058	41.9744	40.4109	40.1579	40.9115	40.1518	30.8224	35.1619	31.4355	31.9847	31.8423	31.8363	20.5783	22.8813	21.1687	20.7681	23.1586	22.9921	17.8066	18.1548	18.0641	19.1854	17.6241	17.9432	7.56446	8.38945	7.48039	6.10114	7.78368	8.03325	6.11125	7.66218	7.71586	8.14144	6.86169	8.84649
KMW0271*194	Phenol, 3-methyl-	Phenol	C7H8O	108-39-4	smoky, petroleum	0.38	0.183772	0.205783	0.17979	0.189565	0.184245	0.19519	0.162179	0.18078	0.161619	0.156557	0.160659	0.156974	0.343579	0.361995	0.151742	0.311217	0.357837	0.35946	0.327392	0.2273	0.451862	0.363736	0.351814	0.365212	0.540425	0.642136	0.596292	0.571532	0.57481	0.598487	0.473038	0.436407	0.434018	0.466977	0.445941	0.461384
KMW0241*014	Pyrazine, 2-ethyl-3-methyl-	Heterocyclic compound	C7H10N2	15707-23-0	nutty, peanut, musty, corn, raw, earthy, bread	0.24	0.389018	0.378235	0.357477	0.35816	0.35526	0.350828	0.277089	0.305733	0.281925	0.28475	0.272854	0.258467	0.189441	0.206868	0.181724	0.183543	0.195105	0.218204	0.173914	0.153469	0.173182	0.184072	0.172676	0.167892	0.0593645	0.0627607	0.0618605	0.0628063	0.0632062	0.0550655	0.0593533	0.0597144	0.0530736	0.0632229	0.0607897	0.0599921
KMW0247*257	.beta.-Phellandrene	Terpenoids	C10H16	555-10-2	terpenic, herbal	0.036	1.1835	1.17581	1.31823	1.15505	1.32319	1.26976	0.97676	1.29865	1.19443	1.12754	1.09227	1.09944	1.17284	1.19867	1.24649	1.20973	1.24739	1.20232	1.21826	1.12946	1.34483	1.32936	1.31691	1.27316	0.856395	1.0559	0.986618	1.0087	0.941971	1.02809	1.04697	0.956275	0.966309	1.03847	1.0351	0.949342
KMW0264*022	Pyrazine, 3-ethyl-2,5-dimethyl-	Heterocyclic compound	C8H12N2	13360-65-1	potato, cocoa, roasted, nutty	0.0086	107.48	106.899	96.8071	95.1885	99.4049	95.5364	87.0043	90.4038	87.5394	88.4103	86.9923	81.4332	50.4803	56.5953	47.3539	48.1917	51.1455	53.1102	54.7675	46.912	59.3146	58.6092	53.7391	52.7525	23.6558	26.1867	25.5729	25.2728	25.5685	25.5252	28.5555	29.535	27.4882	31.2676	32.0783	31.4098
XMW2700*146	1,2,4-Metheno-1H-indene, octahydro-1,7a-dimethyl-5-(1-methylethyl)-, [1S-(1.alpha.,2.alpha.,3a.beta.,4.alpha.,5.alpha.,7a.beta.,8S*)]-	Terpenoids	C15H24	22469-52-9	-	-	-	-	-	-	-	-	-	-	-	-	-	-	-	-	-	-	-	-	-	-	-	-	-	-	-	-	-	-	-	-	-	-	-	-	-	-
KMW0273*027	Benzene, 1,2,4,5-tetramethyl-	Aromatics	C10H14	95-93-2	rancid, sweet	0.087	0.208303	0.220247	0.218396	0.214616	0.206637	0.207883	0.187397	0.214722	0.16879	0.189841	0.178373	0.199515	0.134884	0.13958	0.172731	0.140671	0.138635	0.145863	0.149027	0.146251	0.166303	0.159163	0.143664	0.172289	0.156652	0.168418	0.167729	0.164051	0.171423	0.175502	0.148217	0.158201	0.151442	0.150661	0.145108	0.15438
KMW0297*088	trans-Linalool oxide (furanoid)	Heterocyclic compound	C10H18O2	34995-77-2	flowery	0.19	1.01342	1.04546	1.0036	1.03554	1.03149	1.00017	0.965047	1.0729	0.957361	0.98376	0.947265	0.962189	0.457193	0.476507	0.493849	0.481408	0.476377	0.492888	0.588157	0.58038	0.60727	0.626231	0.599124	0.601823	0.41842	0.451666	0.465047	0.459769	0.457498	0.43295	0.724612	0.725655	0.71258	0.790243	0.794422	0.778566
XMW2699*312	Naphthalene, 1,6,7-trimethyl-	Aromatics	C13H14	2245-38-7	earthy	9	0.00564398	0.00550155	0.00500804	0.00661085	0.00626551	0.00634908	0.00672088	0.00682557	0.00616448	0.00653142	0.0060804	0.00668429	0.000938531	0.000974004	0.000986796	0.000966417	0.000979509	0.000967033	0.0010243	0.00102318	0.00105775	0.00114981	0.00112689	0.00116415	0.00935703	0.00926256	0.00809698	0.0106121	0.00891507	0.00908915	0.00616229	0.00610147	0.0065555	0.00637075	0.00600459	0.00619637
XMW2686*253	1-(5-Methyl-2-pyrazinyl)-1-ethanone	Ketone	C7H8N2O	22047-27-4	popcorn	3	0.00381591	0.00360997	0.00382589	0.0037554	0.00398303	0.00379971	0.00313226	0.00382935	0.00380954	0.00397905	0.00330792	0.00367086	0.00340054	0.00352906	0.0029832	0.00355187	0.00353581	0.00334524	0.00337712	0.00312182	0.00313866	0.00285447	0.00316153	0.00298237	0.00286835	0.00292481	0.00275512	0.0026333	0.00267736	0.00241423	0.00227055	0.00249813	0.00257992	0.00266634	0.00225853	0.00276932
KMW0280*139	3,5-Octadien-2-one	Ketone	C8H12O	38284-27-4	fruity, fatty, mushroom	-	-	-	-	-	-	-	-	-	-	-	-	-	-	-	-	-	-	-	-	-	-	-	-	-	-	-	-	-	-	-	-	-	-	-	-	-
XMW2677*321	Naphthalene, 1,2,3,4-tetrahydro-1,5,7-trimethyl-	Aromatics	C13H18	21693-55-0	-	0.002	50.1671	53.0708	47.2545	52.9704	50.5944	51.3787	49.739	52.742	45.9944	48.0946	47.6336	51.267	42.7564	44.6406	42.3232	48.7957	42.1151	44.6012	28.9481	31.2769	42.4529	30.3367	30.4924	32.6117	14.4369	15.1808	14.0706	15.052	14.7752	14.3741	14.8029	15.4019	16.1527	15.6768	15.2128	15.7453
KMW0290*024	Hotrienol	Alcohol	C10H16O	20053-88-7	hyacinth	0.11	0.321969	0.375059	0.357434	0.366024	0.368044	0.357063	0.178148	0.210163	0.181238	0.198508	0.185633	0.184156	0.37732	0.37838	0.389437	0.438594	0.42006	0.428926	0.383162	0.386039	0.444367	0.429285	0.452812	0.416069	0.283776	0.299989	0.324129	0.328654	0.320259	0.332332	0.434799	0.427492	0.408792	0.431249	0.477703	0.461074
XMW2490*445	2-Hexenoic acid, ethyl ester	Ester	C8H14O2	1552-67-6	rummy, fruity, green, sweet, juicy	-	-	-	-	-	-	-	-	-	-	-	-	-	-	-	-	-	-	-	-	-	-	-	-	-	-	-	-	-	-	-	-	-	-	-	-	-
KMW0385*093	Cyclohexanol, 2-methyl-5-(1-methylethenyl)-	Terpenoids	C10H18O	619-01-2	minty, spice	-	-	-	-	-	-	-	-	-	-	-	-	-	-	-	-	-	-	-	-	-	-	-	-	-	-	-	-	-	-	-	-	-	-	-	-	-
KMW0386*281	cis-Dihydrocarvone	Terpenoids	C10H16O	3792-53-8	herbal, warm	-	-	-	-	-	-	-	-	-	-	-	-	-	-	-	-	-	-	-	-	-	-	-	-	-	-	-	-	-	-	-	-	-	-	-	-	-
KMW0388*282	Carveol	Terpenoids	C10H16O	99-48-9	minty, spearmint, cool, green, herbal, caraway, spicy	-	-	-	-	-	-	-	-	-	-	-	-	-	-	-	-	-	-	-	-	-	-	-	-	-	-	-	-	-	-	-	-	-	-	-	-	-
XMW1350*312	Naphthalene, 2,3,6-trimethyl-	Aromatics	C13H14	829-26-5	fruity, dry	-	-	-	-	-	-	-	-	-	-	-	-	-	-	-	-	-	-	-	-	-	-	-	-	-	-	-	-	-	-	-	-	-	-	-	-	-
XMW1401*042	n-Valeric acid cis-3-hexenyl ester	Ester	C11H20O2	35852-46-1	green, fruity, apple, pear, kiwi, unripe, banana, tropical	0.06	2.69691	2.82557	2.84797	2.78181	2.7323	2.7698	2.72258	3.07745	2.68567	2.81344	2.76035	2.77755	2.83444	2.84	2.94452	2.94477	2.88074	2.96261	2.86399	2.71187	3.129	2.94731	2.79943	2.80476	2.47447	2.85204	2.62125	2.67372	2.74401	2.65301	2.60073	2.61356	2.61089	2.71957	2.71914	2.67134
KMW0537*371	Cyclohexane, 1-ethenyl-1-methyl-2,4-bis(1-methylethenyl)-, (1.alpha.,2.beta.,4.beta.)-	Terpenoids	C15H24	33880-83-0	herbal, waxy, fresh	-	-	-	-	-	-	-	-	-	-	-	-	-	-	-	-	-	-	-	-	-	-	-	-	-	-	-	-	-	-	-	-	-	-	-	-	-
KMW0543*035	(3R,6R)-2,2,6-Trimethyl-6-vinyltetrahydro-2H-pyran-3-ol	Heterocyclic compound	C10H18O2	14009-71-3	citrus, green	5	0.0196373	0.0240137	0.0241494	0.0260584	0.0277418	0.0257393	0.0215768	0.028048	0.0209951	0.0225139	0.0202696	0.0240323	0.0249862	0.0232134	0.0298959	0.0316108	0.0289133	0.0279312	0.022349	0.0287882	0.0270604	0.0242028	0.0251051	0.0261406	0.0185677	0.0188366	0.0213436	0.0214696	0.0207805	0.0192228	0.0196651	0.0186012	0.0185083	0.0196359	0.0183283	0.0176076
KMW0548*108	1H-Cycloprop[e]azulene, 1a,2,3,4,4a,5,6,7b-octahydro-1,1,4,7-tetramethyl-, [1aR-(1a.alpha.,4.alpha.,4a.beta.,7b.alpha.)]-	Terpenoids	C15H24	489-40-7	woody, balsamic	-	-	-	-	-	-	-	-	-	-	-	-	-	-	-	-	-	-	-	-	-	-	-	-	-	-	-	-	-	-	-	-	-	-	-	-	-
KMW0555*366	trans-.alpha.-Bergamotene	Terpenoids	C15H24	13474-59-4	woody, warm, tea	-	-	-	-	-	-	-	-	-	-	-	-	-	-	-	-	-	-	-	-	-	-	-	-	-	-	-	-	-	-	-	-	-	-	-	-	-
KMW0556*369	Naphthalene, decahydro-4a-methyl-1-methylene-7-(1-methylethenyl)-, [4aR-(4a.alpha.,7.alpha.,8a.beta.)]-	Terpenoids	C15H24	17066-67-0	herbal	-	-	-	-	-	-	-	-	-	-	-	-	-	-	-	-	-	-	-	-	-	-	-	-	-	-	-	-	-	-	-	-	-	-	-	-	-
XMW1351*361	(3aS,8aS)-6,8a-Dimethyl-3-(propan-2-ylidene)-1,2,3,3a,4,5,8,8a-octahydroazulene	Terpenoids	C15H24	395070-76-5	-	-	-	-	-	-	-	-	-	-	-	-	-	-	-	-	-	-	-	-	-	-	-	-	-	-	-	-	-	-	-	-	-	-	-	-	-	-
KMW0566*060	Naphthalene, decahydro-4a-methyl-1-methylene-7-(1-methylethylidene)-, (4aR-trans)-	Terpenoids	C15H24	515-17-3	woody	-	-	-	-	-	-	-	-	-	-	-	-	-	-	-	-	-	-	-	-	-	-	-	-	-	-	-	-	-	-	-	-	-	-	-	-	-
KMW0530*352	Geranyl acetate	Terpenoids	C12H20O2	105-87-3	lemon	0.1	5.70693	5.82102	5.83627	5.91977	5.86101	5.83407	5.267	5.77934	5.03244	5.24897	5.18919	5.29944	4.74623	4.86491	5.18394	5.44964	5.06935	5.07594	4.83398	5.20781	6.7613	5.14388	5.13158	5.25225	3.36796	3.72394	3.55427	3.69377	3.65887	3.61723	4.49906	3.63092	4.55107	4.65201	4.52602	3.6798
KMW0570*339	2-Dodecenal, (E)-	Aldehyde	C12H22O	20407-84-5	citrus, metallic, mandarin, orange, waxy, aldehydic	0.0073	0.914471	0.959381	2.02455	1.29555	1.06391	1.38854	1.30239	2.34166	1.20006	2.03107	1.15263	1.231	0.969814	1.08765	1.08898	0.920427	0.881521	1.80615	1.1627	1.55415	2.79396	2.11333	1.44651	1.46372	1.24138	1.24238	1.6759	1.17783	1.61442	1.85247	1.46321	1.43388	1.36353	1.32027	1.35446	1.37738
KMW0572*446	trans-Cinnamic acid	Acid	C9H8O2	140-10-3	balsamic, sweet, storax	5	0.00259948	0.00243218	0.00227717	0.00253579	0.00286279	0.0024241	0.00588284	0.00590095	0.00539117	0.00580765	0.00558881	0.0058802	0.011366	0.0126033	0.0123159	0.0140363	0.0117707	0.0125319	0.025297	0.0287435	0.0401996	0.0276937	0.0273224	0.0288028	0.0453812	0.0469479	0.0417945	0.0478484	0.0442497	0.044685	0.0430733	0.0420225	0.0432203	0.0422171	0.0378929	0.0406275
KMW0576*365	Aromandendrene	Terpenoids	C15H24	489-39-4	woody	-	-	-	-	-	-	-	-	-	-	-	-	-	-	-	-	-	-	-	-	-	-	-	-	-	-	-	-	-	-	-	-	-	-	-	-	-
KMW0582*151	.beta.-Guaiene	Terpenoids	C15H24	88-84-6	sweet, woody, dry, guaiacwood, spicy, powdery	-	-	-	-	-	-	-	-	-	-	-	-	-	-	-	-	-	-	-	-	-	-	-	-	-	-	-	-	-	-	-	-	-	-	-	-	-
XMW1342*431	Naphthalene, 1,4-dimethyl-	Aromatics	C12H12	571-58-4	-	-	-	-	-	-	-	-	-	-	-	-	-	-	-	-	-	-	-	-	-	-	-	-	-	-	-	-	-	-	-	-	-	-	-	-	-	-
KMW0590*083	Naphthalene, 1,2,3,5,6,7,8,8a-octahydro-1,8a-dimethyl-7-(1-methylethenyl)-, [1R-(1.alpha.,7.beta.,8a.alpha.)]-	Terpenoids	C15H24	4630-07-3	sweet, fresh, citrus, grapefruit, woody, orange, asprin, dry, green, oily	-	-	-	-	-	-	-	-	-	-	-	-	-	-	-	-	-	-	-	-	-	-	-	-	-	-	-	-	-	-	-	-	-	-	-	-	-
KMW0533*241	Indole, 3-methyl-	Heterocyclic compound	C9H9N	83-34-1	animalic, fecal, indole, civet	0.00041	4.46311	6.06016	10.9311	7.67589	10.771	6.34988	11.614	4.97609	10.3859	6.05977	11.241	12.1849	10.4558	14.2213	14.1515	15.6323	12.3723	13.3212	16.241	20.5217	26.5862	17.5845	17.9882	18.2443	15.8691	18.3892	16.1565	18.2695	15.8671	16.0787	16.4558	16.6997	19.3057	17.0564	14.5306	18.0249
KMW0528*355	Hexanoic acid, 3-hexenyl ester, (Z)-	Ester	C12H22O2	31501-11-8	fruity, green, waxy, pear, winey, tropical, grassy, pineapple	0.781	0.0605593	0.0668238	0.061433	0.0616637	0.0653553	0.0661229	0.0873012	0.0661472	0.0776574	0.0845034	0.0762455	0.0881468	0.151354	0.159146	0.129817	0.147251	0.150163	0.168773	0.347197	0.405181	0.516658	0.368639	0.376752	0.395536	0.538623	0.543467	0.497166	0.573994	0.509983	0.5292	0.50655	0.491163	0.50328	0.494967	0.4458	0.460397
KMW0480*050	trans-Geranic acid methyl ester	Terpenoids	C11H18O2	1189-09-9	flowery, green, fruity	-	-	-	-	-	-	-	-	-	-	-	-	-	-	-	-	-	-	-	-	-	-	-	-	-	-	-	-	-	-	-	-	-	-	-	-	-
KMW0396*314	2-Octenoic acid, ethyl ester	Ester	C10H18O2	2351-90-8	fruity, green, pineapple, pear skin, waxy, juicy	-	-	-	-	-	-	-	-	-	-	-	-	-	-	-	-	-	-	-	-	-	-	-	-	-	-	-	-	-	-	-	-	-	-	-	-	-
KMW0428*107	2-Cyclohexen-1-one, 3-methyl-6-(1-methylethyl)-	Terpenoids	C10H16O	89-81-6	herbal, minty, camphor, medicinal	0.68	0.0684923	0.0777751	0.0733944	0.0687669	0.0708974	0.0687352	0.0545353	0.0565824	0.0531385	0.0544935	0.0553075	0.0534225	0.0624001	0.0638926	0.0752881	0.0741484	0.0626095	0.0684071	0.075618	0.0921902	0.086755	0.0806719	0.0703818	0.0747306	0.0346482	0.0390258	0.036713	0.0394235	0.0377589	0.0415337	0.0463514	0.0506033	0.0439089	0.0569835	0.0520744	0.0523255
KMW0430*116	Citronellol	Terpenoids	C10H20O	106-22-9	floral, rose, lime	0.04	1.40041	1.51936	1.53148	1.85976	1.63319	1.53752	1.37252	1.78453	1.37527	1.49361	1.4299	1.55963	1.45153	1.30723	1.68934	1.65595	1.46208	1.46092	1.44539	1.70562	2.22057	1.81979	1.80491	1.68674	1.68116	1.73556	1.62511	1.73704	1.80639	1.75324	1.6812	1.52615	1.56111	1.6241	1.44878	1.60609
KMW0444*279	Carvone	Terpenoids	C10H14O	99-49-0	minty, licorice	0.067	0.81787	0.882668	0.923179	0.897899	0.846436	0.862411	0.869071	1.00586	0.890661	0.941317	0.896082	0.943412	0.880741	0.882745	0.854761	0.904149	0.913526	0.907205	0.879114	0.77449	0.987106	0.872757	0.859679	0.857256	0.797814	0.878467	0.832001	0.825496	0.896868	0.822436	0.798942	0.79935	0.794794	0.828396	0.83925	0.82684
KMW0447*285	3,6-Octadien-1-ol, 3,7-dimethyl-, (Z)-	Terpenoids	C10H18O	5944-20-7	-	-	-	-	-	-	-	-	-	-	-	-	-	-	-	-	-	-	-	-	-	-	-	-	-	-	-	-	-	-	-	-	-	-	-	-	-	-
KMW0467*077	Cinnamaldehyde, (E)-	Aldehyde	C9H8O	14371-10-9	sweet, spice, candy, cinnamon, warm	6	0.00378226	0.00399713	0.00354824	0.00418119	0.00411992	0.00466594	0.00394229	0.0047702	0.0035947	0.00405354	0.00451808	0.00411914	0.00332446	0.00350925	0.00375604	0.00408753	0.00387543	0.00337779	0.00368766	0.0037375	0.00713887	0.00411157	0.00360781	0.00405485	0.00261496	0.00302528	0.00192308	0.00259781	0.00286812	0.00264816	0.00311302	0.00278369	0.00298677	0.00314725	0.00318227	0.00298089
KMW0478*147	cis-.beta.-Farnesene	Terpenoids	C15H24	28973-97-9	citrus, green	0.087	61.9714	66.8557	62.8062	69.3543	68.6636	66.5685	52.2609	56.4557	49.5122	52.0426	49.5953	52.8093	50.0323	51.7921	54.5602	59.8894	53.1539	53.9811	64.0206	70.6841	95.6143	69.2301	68.8536	72.6963	55.8382	60.6262	57.2596	61.9041	59.4029	58.627	68.1843	67.4264	68.9495	70.7097	67.908	68.612
KMW0482*049	2,4-Decadienal, (E,E)-	Aldehyde	C10H16O	25152-84-5	dusty, waxy, oily, soapy	7e-05	189.105	207.387	167.533	175.607	168.595	165.326	171.351	165.833	120.405	156.658	142.608	139.7	198.245	166.224	161.343	157.474	154.767	176.922	210.705	181.991	266.611	215.993	183.608	197.625	107.576	124.825	126.203	101.885	131.14	110.962	177.179	168.816	188.519	187.766	173.551	189.358
KMW0513*053	2-Undecenal	Aldehyde	C11H20O	2463-77-6	fresh, fruity, orange, peel	0.01	16.6375	17.7196	16.3856	17.3141	17.2539	17.3225	15.2264	16.7291	15.1518	15.3366	15.2899	15.2875	13.2544	14.1119	13.9722	14.3978	14.1365	14.5191	15.5044	15.9093	20.1182	16.2378	15.8592	16.4502	9.41904	10.3924	9.65392	10.5307	9.84608	9.95939	11.3006	10.8837	11.0604	11.6933	11.5654	11.2101
KMW0522*146	Copaene	Terpenoids	C15H24	3856-25-5	woody, spicy, honey	0.006	1.34724	1.40916	1.30946	1.40205	1.4218	1.38726	7.10465	6.74929	6.51027	6.9338	6.17944	7.338	12.8197	14.0832	13.0859	14.9844	12.7187	20.9984	35.7948	39.8835	53.5816	38.494	36.9416	40.896	49.266	50.0174	45.1193	52.098	42.9079	43.8469	45.4226	43.8603	44.5707	44.733	39.5636	42.1661
NMW0246*391	trans-4-Methoxycinnamaldehyde	Aldehyde	C10H10O2	24680-50-0	spicy, floral, sweet, cinnamon, cherry, vanilla	-	-	-	-	-	-	-	-	-	-	-	-	-	-	-	-	-	-	-	-	-	-	-	-	-	-	-	-	-	-	-	-	-	-	-	-	-
XMW0902*261	2,6-Dimethyl-2-trans-6-octadiene	Terpenoids	C10H18	2609-23-6	-	-	-	-	-	-	-	-	-	-	-	-	-	-	-	-	-	-	-	-	-	-	-	-	-	-	-	-	-	-	-	-	-	-	-	-	-	-
NMW0261*318	Naphthalene, 1-nitro-	Nitrogen compounds	C10H7NO2	86-57-7	-	-	-	-	-	-	-	-	-	-	-	-	-	-	-	-	-	-	-	-	-	-	-	-	-	-	-	-	-	-	-	-	-	-	-	-	-	-
NMW0264*302	2-Propenoic acid, 3-(3-hydroxyphenyl)-	Acid	C9H8O3	588-30-7	-	10	0.000336899	0.000352383	0.000327452	0.000350604	0.000355543	0.000346907	0.000310181	0.000337535	0.000312232	0.000317696	0.000309054	0.00031384	0.00406292	0.00417184	0.00515914	0.00566445	0.00445499	0.00439216	0.00396811	0.00518657	0.00632757	0.00425036	0.00458851	0.00507209	0.00201767	0.00210478	0.00202084	0.00228506	0.00222249	0.00186414	0.00188012	0.00182338	0.00201548	0.00192746	0.00201469	0.00188722
XMW0186*139	3,5-Octadien-2-one, (E,E)-	Ketone	C8H12O	30086-02-3	fruity, green, grassy	0.0005	150.818	155.172	158.648	159.127	154.154	155.022	151.929	173.165	144.085	150.828	144.48	145.087	149.833	147.523	156.979	155.449	149.617	172.097	143.677	142.288	147.914	162.046	152.252	141.99	102.767	113.78	119.584	112.606	114.807	108.655	131.537	123.838	117.394	139.201	138.259	139.192
WAMW1799*181	2-Pentenoic acid	Acid	C5H8O2	626-98-2	pungent, fatty	-	-	-	-	-	-	-	-	-	-	-	-	-	-	-	-	-	-	-	-	-	-	-	-	-	-	-	-	-	-	-	-	-	-	-	-	-
WAMW1895*260	2,4-Nonadienal	Aldehyde	C9H14O	6750-03-4	fatty, green, cucumber	5e-05	160.306	208.021	239.258	176.091	252.525	208.048	133.562	205.585	159.677	256.347	125.179	181.197	235.968	112.47	151.165	120.285	189.534	154.363	323.61	153.018	240.697	235.051	212.801	207.802	121.253	125.34	102.618	113.532	101.878	170.569	176.364	207.838	181.799	140.545	176.06	162.898
XMW0157*063	(2R,3R,6S)-6-Isopropyl-3-methyl-2-(prop-1-en-2-yl)-3-vinylcyclohexanone	Terpenoids	C15H24O	39020-72-9	-	-	-	-	-	-	-	-	-	-	-	-	-	-	-	-	-	-	-	-	-	-	-	-	-	-	-	-	-	-	-	-	-	-	-	-	-	-
WAMW2190*095	dl-Menthol	Terpenoids	C10H20O	89-78-1	pepperminty, cool, woody	0.13	1.13932	1.42602	1.40104	1.18906	1.30797	1.0831	0.698555	1.38962	1.12078	0.756364	0.726777	0.788222	0.584306	0.918713	0.777943	0.597276	0.701754	0.637592	0.810818	0.349187	0.897452	0.983775	0.92542	0.677281	0.599912	1.03585	0.732925	0.698811	0.624905	0.974488	0.887668	0.581356	0.614934	0.949076	0.871329	0.750431
XMW0143*108	1H-3a,7-Methanoazulene, 2,3,4,7,8,8a-hexahydro-3,6,8,8-tetramethyl-, [3R-(3.alpha.,3a.beta.,7.beta.,8a.alpha.)]-	Terpenoids	C15H24	469-61-4	woody, cedary, sweet, fresh	-	-	-	-	-	-	-	-	-	-	-	-	-	-	-	-	-	-	-	-	-	-	-	-	-	-	-	-	-	-	-	-	-	-	-	-	-
WAMW2199*418	Phenol, 2,6-dimethoxy-	Phenol	C8H10O3	91-10-1	smoky, phenol, balsamic, bacon, powdery, woody	0.029	1.57292	1.60508	1.32718	1.3072	1.18098	1.28542	1.48555	1.21239	1.47566	1.4548	1.45605	1.27105	1.1319	1.25921	1.04162	0.990106	0.961406	1.13765	1.40772	1.06207	1.64457	1.58884	1.23511	1.2363	1.01922	1.00774	1.00889	1.04276	1.07105	1.02538	1.03248	1.17661	1.09158	1.14204	1.19106	1.26988
WAMW2219*199	4-Heptenal, (E)-	Aldehyde	C7H12O	929-22-6	-	0.034	0.572053	0.462578	0.535152	0.62176	0.454252	0.433564	0.311827	0.540051	0.311173	0.48891	0.325931	0.339118	0.389269	0.212706	0.420378	0.498964	0.347177	0.442884	0.361095	0.321615	0.407626	0.427856	0.411075	0.336594	0.37213	0.507877	0.478767	0.521517	0.340921	0.486094	0.398686	0.462208	0.416577	0.47702	0.501804	0.444111
WMW0003*364	Naphthalene, 1,2,3,5,6,7,8,8a-octahydro-1,8a-dimethyl-7-(1-methylethenyl)-, [1S-(1.alpha.,7.alpha.,8a.alpha.)]-	Terpenoids	C15H24	10219-75-7	-	-	-	-	-	-	-	-	-	-	-	-	-	-	-	-	-	-	-	-	-	-	-	-	-	-	-	-	-	-	-	-	-	-	-	-	-	-
WMW0004*054	Ylangene	Terpenoids	C15H24	14912-44-8	-	-	-	-	-	-	-	-	-	-	-	-	-	-	-	-	-	-	-	-	-	-	-	-	-	-	-	-	-	-	-	-	-	-	-	-	-	-
WMW0008*362	Longifolene	Terpenoids	C15H24	475-20-7	sweet, woody, rose, medicinal, fir, needle	-	-	-	-	-	-	-	-	-	-	-	-	-	-	-	-	-	-	-	-	-	-	-	-	-	-	-	-	-	-	-	-	-	-	-	-	-
WMW0010*371	Cyclohexane, 1-ethenyl-1-methyl-2,4-bis(1-methylethenyl)-, [1S-(1.alpha.,2.beta.,4.beta.)]-	Terpenoids	C15H24	515-13-9	sweet	-	-	-	-	-	-	-	-	-	-	-	-	-	-	-	-	-	-	-	-	-	-	-	-	-	-	-	-	-	-	-	-	-	-	-	-	-
XMW0192*015	(+)-4-Carene	Terpenoids	C10H16	29050-33-7	-	-	-	-	-	-	-	-	-	-	-	-	-	-	-	-	-	-	-	-	-	-	-	-	-	-	-	-	-	-	-	-	-	-	-	-	-	-
XMW0196*292	Decane, 4-methyl-	Hydrocarbons	C11H24	2847-72-5	pungent	-	-	-	-	-	-	-	-	-	-	-	-	-	-	-	-	-	-	-	-	-	-	-	-	-	-	-	-	-	-	-	-	-	-	-	-	-
XMW0241*041	Undecane, 4,8-dimethyl-	Hydrocarbons	C13H28	17301-33-6	-	-	-	-	-	-	-	-	-	-	-	-	-	-	-	-	-	-	-	-	-	-	-	-	-	-	-	-	-	-	-	-	-	-	-	-	-	-
WAMW0579*442	2-Acetyl-5-methylthiophene	Heterocyclic compound	C7H8OS	13679-74-8	sweet, spicy, honey, hawthorn, almond, acacia, hyacinth, caramel, graham, cracker	-	-	-	-	-	-	-	-	-	-	-	-	-	-	-	-	-	-	-	-	-	-	-	-	-	-	-	-	-	-	-	-	-	-	-	-	-
WAMW0630*017	Cyclohexene, 1-methyl-5-(1-methylethenyl)-, (R)-	Terpenoids	C10H16	1461-27-4	-	0.045	1.17972	1.01118	0.884665	1.03443	1.04904	0.964764	0.941514	0.901202	0.822302	0.850208	0.762455	0.930575	0.795537	0.858123	0.705642	0.858589	0.695501	0.828724	0.928734	0.993478	1.38812	0.966188	0.895775	1.01803	0.707152	0.665869	0.634526	0.733209	0.669684	0.643673	0.642862	0.63841	0.592617	0.59799	0.543079	0.598154
XMW0242*426	Undecane, 3,9-dimethyl-	Hydrocarbons	C13H28	17301-31-4	-	-	-	-	-	-	-	-	-	-	-	-	-	-	-	-	-	-	-	-	-	-	-	-	-	-	-	-	-	-	-	-	-	-	-	-	-	-
XMW0238*041	Undecane, 4,4-dimethyl-	Hydrocarbons	C13H28	17312-68-4	-	-	-	-	-	-	-	-	-	-	-	-	-	-	-	-	-	-	-	-	-	-	-	-	-	-	-	-	-	-	-	-	-	-	-	-	-	-
XMW0197*058	(1S,4S,4aS)-1-Isopropyl-4,7-dimethyl-1,2,3,4,4a,5-hexahydronaphthalene	Terpenoids	C15H24	267665-20-3	-	-	-	-	-	-	-	-	-	-	-	-	-	-	-	-	-	-	-	-	-	-	-	-	-	-	-	-	-	-	-	-	-	-	-	-	-	-
WAMW0788*178	Cyclopentanone, 3-methyl-	Ketone	C6H10O	1757-42-2	roasted, beefy	-	-	-	-	-	-	-	-	-	-	-	-	-	-	-	-	-	-	-	-	-	-	-	-	-	-	-	-	-	-	-	-	-	-	-	-	-
XMW0234*366	cis-.alpha.-Bergamotene	Terpenoids	C15H24	18252-46-5	-	-	-	-	-	-	-	-	-	-	-	-	-	-	-	-	-	-	-	-	-	-	-	-	-	-	-	-	-	-	-	-	-	-	-	-	-	-
XMW0216*063	(2S,3S,6S)-6-Isopropyl-3-methyl-2-(prop-1-en-2-yl)-3-vinylcyclohexanone	Terpenoids	C15H24O	21698-44-2	-	-	-	-	-	-	-	-	-	-	-	-	-	-	-	-	-	-	-	-	-	-	-	-	-	-	-	-	-	-	-	-	-	-	-	-	-	-
XMW0202*261	cis-2,6-Dimethyl-2,6-octadiene	Hydrocarbons	C10H18	2492-22-0	-	-	-	-	-	-	-	-	-	-	-	-	-	-	-	-	-	-	-	-	-	-	-	-	-	-	-	-	-	-	-	-	-	-	-	-	-	-
XMW0200*375	Tetradecane, 4-methyl-	Hydrocarbons	C15H32	25117-24-2	-	-	-	-	-	-	-	-	-	-	-	-	-	-	-	-	-	-	-	-	-	-	-	-	-	-	-	-	-	-	-	-	-	-	-	-	-	-
WMW0023*011	(1R)-2,6,6-Trimethylbicyclo[3.1.1]hept-2-ene	Terpenoids	C10H16	7785-70-8	harsh, terpene, aromatic, minty	0.0053	0.769531	0.300097	0.442111	0.0597164	0.502059	0.387767	0.453892	0.461653	0.538155	0.511994	0.509595	0.267712	0.285446	0.560397	0.503993	0.491918	0.515493	0.61939	0.570819	0.498612	0.672891	0.379813	0.829588	0.5926	0.728755	0.858113	0.610877	0.365085	0.741775	0.704626	0.852808	0.860786	0.691018	0.850234	0.685676	0.899272
WMW0024*040	Bicyclo[3.1.1]hept-3-en-2-one, 4,6,6-trimethyl-	Terpenoids	C10H14O	80-57-9	camphor, menthol, celery	-	-	-	-	-	-	-	-	-	-	-	-	-	-	-	-	-	-	-	-	-	-	-	-	-	-	-	-	-	-	-	-	-	-	-	-	-
WMW0223*365	Cedrene	Terpenoids	C15H24	11028-42-5	cedarwood, woody	-	-	-	-	-	-	-	-	-	-	-	-	-	-	-	-	-	-	-	-	-	-	-	-	-	-	-	-	-	-	-	-	-	-	-	-	-
WMW0179*400	L-Fenchone	Terpenoids	C10H16O	7787-20-4	camphor, herbal, earthy, woody	0.11	0.163838	0.212623	0.163699	0.212639	0.202514	0.221271	0.21026	0.239251	0.189473	0.219915	0.206741	0.224263	0.123665	0.130222	0.138236	0.157562	0.147033	0.132378	0.137834	0.172039	0.210904	0.159106	0.143799	0.161984	0.110328	0.125297	0.12641	0.117932	0.114853	0.101706	0.139727	0.131059	0.180321	0.161362	0.151499	0.149201
WMW0182*073	9,12,15-Octadecatrienoic acid, methyl ester	Ester	C19H32O2	7361-80-0	bland	-	-	-	-	-	-	-	-	-	-	-	-	-	-	-	-	-	-	-	-	-	-	-	-	-	-	-	-	-	-	-	-	-	-	-	-	-
WMW0196*086	Lilac aldehyde C	Aldehyde	C10H16O2	53447-48-6	sweet, flowery	-	-	-	-	-	-	-	-	-	-	-	-	-	-	-	-	-	-	-	-	-	-	-	-	-	-	-	-	-	-	-	-	-	-	-	-	-
WMW0215*018	.beta.-Ocimene	Terpenoids	C10H16	13877-91-3	apple, pear, fruity	0.034	0.424088	0.404765	0.387627	0.422524	0.430934	0.420377	0.346521	0.420471	0.330853	0.330642	0.309989	0.36148	0.431083	0.454934	0.481332	0.526443	0.481823	0.517672	0.310954	0.31825	0.349216	0.356518	0.295997	0.317143	0.257502	0.298793	0.326369	0.322289	0.272847	0.282335	0.265098	0.309189	0.266204	0.350768	0.318253	0.315737
XMW0003*298	Phenol, 2,4-dichloro-	Phenol	C6H4Cl2O	120-83-2	-	0.0014	98.1628	100.223	93.7914	100.1	99.8329	96.9314	90.6277	99.945	87.38	92.3196	85.5801	90.1861	49.2415	53.2882	55.919	56.326	54.6887	58.2308	72.6177	76.0984	84.1158	74.0696	74.3804	73.5047	20.4179	21.0911	20.4486	22.6127	22.4175	21.7951	23.2744	21.1234	21.6769	23.1915	21.6117	23.1269
XMW0108*356	2,4-Dimethyldodecane	Hydrocarbons	C14H30	6117-99-3	-	-	-	-	-	-	-	-	-	-	-	-	-	-	-	-	-	-	-	-	-	-	-	-	-	-	-	-	-	-	-	-	-	-	-	-	-	-
XMW0004*119	Bicyclo[3.1.1]heptane, 6,6-dimethyl-2-methylene-, (1S)-	Terpenoids	C10H16	18172-67-3	dry, woody, fresh, pine, hay, green, resinous	4.16	0.037761	0.0301746	0.0287518	0.030596	0.0286039	0.0305928	0.023546	0.0189573	0.0258561	0.0251136	0.022911	0.0172116	0.026798	0.0274534	0.0280468	0.0305467	0.029543	0.0303404	0.0237618	0.0226612	0.0248307	0.026023	0.0237793	0.025355	0.0182754	0.0241546	0.0296917	0.0254424	0.0189269	0.0309459	0.0243906	0.031982	0.0243778	0.0258777	0.0355262	0.0390972
XMW0041*326	Benzene, 1,2-dimethoxy-4-(1-propenyl)-	Ether	C11H14O2	93-16-3	spicy, clove, blossom, carnation, woody	1.6	0.0046566	0.00443171	0.00383113	0.0044932	0.00503625	0.00497449	0.00445351	0.00411333	0.00435345	0.00379776	0.0042072	0.00391212	0.00556227	0.00555534	0.0066998	0.00647992	0.00612704	0.00559301	0.00571893	0.00673396	0.00953437	0.00654408	0.00631647	0.00705834	0.00987358	0.011805	0.0109614	0.0117601	0.0111871	0.0114704	0.0093201	0.0102292	0.00962562	0.00967931	0.00953753	0.00971978
XMW0009*064	Naphthalene, 1,2,4a,5,8,8a-hexahydro-4,7-dimethyl-1-(1-methylethyl)-, [1S-(1.alpha.,4a.beta.,8a.alpha.)]-	Terpenoids	C15H24	523-47-7	green, woody	-	-	-	-	-	-	-	-	-	-	-	-	-	-	-	-	-	-	-	-	-	-	-	-	-	-	-	-	-	-	-	-	-	-	-	-	-
XMW0012*064	Naphthalene, 1,2,4a,5,6,8a-hexahydro-4,7-dimethyl-1-(1-methylethyl)-, [1S-(1.alpha.,4a.beta.,8a.alpha.)]-	Terpenoids	C15H24	24406-05-1	woody, dry	-	-	-	-	-	-	-	-	-	-	-	-	-	-	-	-	-	-	-	-	-	-	-	-	-	-	-	-	-	-	-	-	-	-	-	-	-
XMW0015*217	Benzaldehyde, 4-methyl-	Aldehyde	C8H8O	104-87-0	fruity, cherry, deep, phenol	-	-	-	-	-	-	-	-	-	-	-	-	-	-	-	-	-	-	-	-	-	-	-	-	-	-	-	-	-	-	-	-	-	-	-	-	-
XMW0038*293	Quinoline, 2,7-dimethyl-	Heterocyclic compound	C11H11N	93-37-8	-	-	-	-	-	-	-	-	-	-	-	-	-	-	-	-	-	-	-	-	-	-	-	-	-	-	-	-	-	-	-	-	-	-	-	-	-	-
XMW0033*143	(1R,3aS,4aS,8aS)-1,4,4,6-Tetramethyl-1,2,3,3a,4,4a,7,8-octahydrocyclopenta[1,4]cyclobuta[1,2]benzene	Terpenoids	C15H24	94535-52-1	-	-	-	-	-	-	-	-	-	-	-	-	-	-	-	-	-	-	-	-	-	-	-	-	-	-	-	-	-	-	-	-	-	-	-	-	-	-
WMW0146*427	.alpha.-Maaliene	Terpenoids	C15H24	489-28-1	-	-	-	-	-	-	-	-	-	-	-	-	-	-	-	-	-	-	-	-	-	-	-	-	-	-	-	-	-	-	-	-	-	-	-	-	-	-
XMW0110*356	Dodecane, 4,6-dimethyl-	Hydrocarbons	C14H30	61141-72-8	-	-	-	-	-	-	-	-	-	-	-	-	-	-	-	-	-	-	-	-	-	-	-	-	-	-	-	-	-	-	-	-	-	-	-	-	-	-
WMW0064*269	2-Nonen-1-ol, (E)-	Alcohol	C9H18O	31502-14-4	waxy, green, violet, melon	0.209	0.0645691	0.0924924	0.0945968	0.117205	0.126204	0.13241	0.0781515	0.107999	0.0777271	0.0824822	0.0692933	0.106271	0.0918529	0.0618855	0.140283	0.160076	0.13302	0.111672	0.101676	0.088627	0.197582	0.117832	0.133659	0.164488	0.0715958	0.0796263	0.074825	0.0599185	0.0715509	0.0808358	0.0931325	0.088774	0.16986	0.110984	0.0956049	0.0969889
WMW0046*419	trans-2-Undecen-1-ol	Alcohol	C11H22O	75039-84-8	floral, rose, waxy, fresh, fruity	-	-	-	-	-	-	-	-	-	-	-	-	-	-	-	-	-	-	-	-	-	-	-	-	-	-	-	-	-	-	-	-	-	-	-	-	-
XMW0136*357	4-Isopropyl-6-methyl-1-methylene-1,2,3,4-tetrahydronaphthalene	Terpenoids	C15H20	50277-34-4	-	-	-	-	-	-	-	-	-	-	-	-	-	-	-	-	-	-	-	-	-	-	-	-	-	-	-	-	-	-	-	-	-	-	-	-	-	-
WMW0048*264	6-Nonenal, (E)-	Aldehyde	C9H16O	2277-20-5	-	2.2e-05	260.611	192.895	224.489	245.164	148.991	116.463	243.408	231.376	145.75	223.58	214.331	261.34	151.396	119.008	146.443	204.453	169.497	99.243	191.429	297.04	423.53	186.901	188.117	293.62	281.374	206.67	166.846	270.048	163.756	192.176	120.65	168.07	152.05	102.614	153.163	170.738
WMW0050*333	2(4H)-Benzofuranone, 5,6,7,7a-tetrahydro-4,4,7a-trimethyl-, (R)-	Ester	C11H16O2	17092-92-1	musky, coumarin	0.0021	453.356	518.557	454.577	547.901	529.888	535.222	438.42	486.413	434.671	442.967	447.053	462.832	417.153	420.805	453.873	491.956	436.253	420.74	448.532	529.41	672.043	464.842	480.934	504.19	437.686	501.825	455.414	507.199	483.677	494.582	479.225	472.984	513.984	500.828	499.465	489.922
WMW0061*138	Benzaldehyde, 2-ethyl-	Aldehyde	C9H10O	22927-13-5	nutty, roasted	-	-	-	-	-	-	-	-	-	-	-	-	-	-	-	-	-	-	-	-	-	-	-	-	-	-	-	-	-	-	-	-	-	-	-	-	-
WMW0062*268	3-Nonen-1-ol, (Z)-	Alcohol	C9H18O	10340-23-5	fresh, waxy, green, melon, rind, tropical, mushroom	-	-	-	-	-	-	-	-	-	-	-	-	-	-	-	-	-	-	-	-	-	-	-	-	-	-	-	-	-	-	-	-	-	-	-	-	-
WMW0065*270	(6Z)-Nonen-1-ol	Alcohol	C9H18O	35854-86-5	fresh, green, melon, waxy, honeydew, cantaloupe, cucumber, clean	0.001	52.086	60.79	57.806	62.2187	70.4196	64.1655	60.2856	66.0029	59.7244	57.5814	59.6754	64.1368	52.5669	60.6381	63.4725	62.933	63.3906	58.022	72.9208	75.6968	121.397	74.6805	80.8093	84.5837	57.2211	71.9774	63.3081	65.186	57.9383	73.6165	65.529	58.3147	64.536	64.4784	60.7362	61.7173
XMW0112*060	Naphthalene, 1,2,4a,5,8,8a-hexahydro-4,7-dimethyl-1-(1-methylethyl)-, (1.alpha.,4a.beta.,8a.alpha.)-(.+/-.)-	Terpenoids	C15H24	5951-61-1	-	-	-	-	-	-	-	-	-	-	-	-	-	-	-	-	-	-	-	-	-	-	-	-	-	-	-	-	-	-	-	-	-	-	-	-	-	-
WMW0081*013	cis-2-(2-Pentenyl)furan	Heterocyclic compound	C9H12O	70424-13-4	-	-	-	-	-	-	-	-	-	-	-	-	-	-	-	-	-	-	-	-	-	-	-	-	-	-	-	-	-	-	-	-	-	-	-	-	-	-
XMW0127*016	o-Cymene	Terpenoids	C10H14	527-84-4	gasoline	0.01144	0.959965	0.817965	0.741184	0.854094	0.905483	0.73558	0.642883	0.59016	0.566108	0.658141	0.539689	0.579448	0.495121	0.600001	0.618609	0.64097	0.515807	0.688529	0.602405	0.700713	0.89851	0.644521	0.638513	0.769597	0.597085	0.5995	0.5442	0.57925	0.623868	0.608729	0.513827	0.470397	0.522674	0.558224	0.449147	0.555684
WMW0100*268	3-Nonen-1-ol, (E)-	Alcohol	C9H18O	10339-61-4	green, waxy, melon, cucumber	-	-	-	-	-	-	-	-	-	-	-	-	-	-	-	-	-	-	-	-	-	-	-	-	-	-	-	-	-	-	-	-	-	-	-	-	-
XMW0257*415	4-Pyridinecarboxylic acid, ethyl ester	Ester	C8H9NO2	1570-45-2	-	-	-	-	-	-	-	-	-	-	-	-	-	-	-	-	-	-	-	-	-	-	-	-	-	-	-	-	-	-	-	-	-	-	-	-	-	-
XMW0264*152	Bicyclo[4.4.0]dec-1-ene, 2-isopropyl-5-methyl-9-methylene-	Terpenoids	C15H24	150320-52-8	-	-	-	-	-	-	-	-	-	-	-	-	-	-	-	-	-	-	-	-	-	-	-	-	-	-	-	-	-	-	-	-	-	-	-	-	-	-
XMW0662*082	Naphthalene, 2-methyl-	Aromatics	C11H10	91-57-6	sweet, floral, woody	0.004	141.542	144.913	136.215	148.329	149.581	140.6	122.526	130.526	116.379	123.075	115.364	129.206	88.5525	92.0598	101.142	104.3	92.9101	97.9016	131.03	142.964	202.115	142.484	138.901	146.906	50.1414	55.3014	50.3173	53.4636	51.6176	53.6293	55.4415	55.583	55.9052	56.5434	53.3377	55.8903
XMW0661*252	4-Hydroxy-2-methylbenzaldehyde	Aldehyde	C8H8O2	41438-18-0	-	-	-	-	-	-	-	-	-	-	-	-	-	-	-	-	-	-	-	-	-	-	-	-	-	-	-	-	-	-	-	-	-	-	-	-	-	-
QWMW0266*441	2,3-Diethylpyrazine	Heterocyclic compound	C8H12N2	15707-24-1	burnt, caramel, chemical, mothball, prickling, roasted, hazelnut	0.05	5.42355	5.37016	4.83863	4.79067	5.03671	4.86125	4.43946	4.58081	4.44628	4.46903	4.35372	4.08905	2.73226	3.11153	2.56715	2.5974	2.80715	2.89737	2.93842	2.51425	3.23945	3.12792	2.8658	2.81076	1.48712	1.62649	1.53869	1.5627	1.57484	1.58904	1.72732	1.79586	1.68522	1.9026	1.82734	1.89083
QWMW0293*328	2,3-Dimethyl-5-isopentylpyrazine	Heterocyclic compound	C11H18N2	18450-01-6	caramel, coffee, sweet	6	0.00335033	0.00438727	0.00486788	0.00513225	0.00421927	0.00517387	0.00444637	0.00601059	0.000461958	0.00403647	0.000510283	0.0058807	9.07932e-05	9.42248e-05	9.54623e-05	9.34909e-05	9.47574e-05	9.35505e-05	0.0025841	0.00319444	0.00440714	0.00293252	0.00327132	0.00375041	0.00319112	0.00336045	0.00280296	0.00337272	0.00289453	0.00288588	0.00354959	0.00327557	0.00340446	0.00362935	0.00314518	0.0033583
QWMW0409*415	Ethyl nicotinate	Ester	C8H9NO2	614-18-6	grain, perfumy, paper	7.781	0.00173999	0.00157345	0.00134878	0.00147434	0.00151755	0.00163703	0.00133329	0.00122332	0.00112614	0.00133003	0.00131211	0.00152057	0.000732702	0.00112165	0.000981767	0.000761312	0.000830532	0.00111617	0.000885083	0.00117265	0.00084613	0.00145267	0.000889606	0.00112159	0.000601308	0.000738056	0.000679269	0.000419813	0.000358242	0.00067079	0.000393033	6.97189e-05	0.000605002	0.00064007	0.000756032	0.000516955
XMW0705*403	2-Naphthalenemethanol, 1,2,3,4,4a,5,6,8a-octahydro-.alpha.,.alpha.,4a,8-tetramethyl-, [2R-(2.alpha.,4a.alpha.,8a.beta.)]-	Terpenoids	C15H26O	473-16-5	-	-	-	-	-	-	-	-	-	-	-	-	-	-	-	-	-	-	-	-	-	-	-	-	-	-	-	-	-	-	-	-	-	-	-	-	-	-
QWMW0433*269	2-Nonen-1-ol, (Z)-	Alcohol	C9H18O	41453-56-9	green, waxy, melon	-	-	-	-	-	-	-	-	-	-	-	-	-	-	-	-	-	-	-	-	-	-	-	-	-	-	-	-	-	-	-	-	-	-	-	-	-
XMW0591*037	Nonane, 2-methyl-5-propyl-	Hydrocarbons	C13H28	31081-17-1	-	-	-	-	-	-	-	-	-	-	-	-	-	-	-	-	-	-	-	-	-	-	-	-	-	-	-	-	-	-	-	-	-	-	-	-	-	-
XMW0700*060	4a,8-Dimethyl-2-(prop-1-en-2-yl)-1,2,3,4,4a,5,6,7-octahydronaphthalene	Terpenoids	C15H24	103827-22-1	-	-	-	-	-	-	-	-	-	-	-	-	-	-	-	-	-	-	-	-	-	-	-	-	-	-	-	-	-	-	-	-	-	-	-	-	-	-
XMW0717*036	Ethanone, 1-(2-methylphenyl)-	Ketone	C9H10O	577-16-2	sweet, hawthorn, powdery, anisic, coumarin, phenol, burnt, nutty, honey	-	-	-	-	-	-	-	-	-	-	-	-	-	-	-	-	-	-	-	-	-	-	-	-	-	-	-	-	-	-	-	-	-	-	-	-	-
XMW0534*040	Bicyclo[3.1.1]hept-3-en-2-one, 4,6,6-trimethyl-, (1S)-	Terpenoids	C10H14O	1196-01-6	spicy, minty, camphor	-	-	-	-	-	-	-	-	-	-	-	-	-	-	-	-	-	-	-	-	-	-	-	-	-	-	-	-	-	-	-	-	-	-	-	-	-
XMW0819*058	cis-Muurola-4(15),5-diene	Terpenoids	C15H24	157477-72-0	-	-	-	-	-	-	-	-	-	-	-	-	-	-	-	-	-	-	-	-	-	-	-	-	-	-	-	-	-	-	-	-	-	-	-	-	-	-
NMW0266*103	.beta.-Asarone	Ether	C12H16O3	5273-86-9	-	-	-	-	-	-	-	-	-	-	-	-	-	-	-	-	-	-	-	-	-	-	-	-	-	-	-	-	-	-	-	-	-	-	-	-	-	-
NMW0268*302	2-Propenoic acid, 3-(2-hydroxyphenyl)-	Acid	C9H8O3	583-17-5	-	25	0.000181266	0.000210519	0.000176945	0.000290481	0.000267954	0.000197263	0.000187694	0.000184342	0.000187025	0.000168846	0.000181074	0.000171045	0.000320469	0.000310699	0.000406477	0.000427438	0.000395256	0.000353761	0.000310961	0.000413243	0.000558291	0.000363929	0.000408201	0.000366145	0.000868946	0.000918841	0.000866572	0.00101961	0.00101881	0.000914704	0.00133745	0.00134342	0.00137073	0.00128916	0.00134481	0.00127316
NMW0275*103	Isoelemicin	Ether	C12H16O3	487-12-7	-	-	-	-	-	-	-	-	-	-	-	-	-	-	-	-	-	-	-	-	-	-	-	-	-	-	-	-	-	-	-	-	-	-	-	-	-	-
XMW0842*458	4aH-Cycloprop[e]azulen-4a-ol, decahydro-1,1,4,7-tetramethyl-, [1aR-(1a.alpha.,4.beta.,4a.beta.,7.alpha.,7a.beta.,7b.alpha.)]-	Terpenoids	C15H26O	5986-49-2	-	-	-	-	-	-	-	-	-	-	-	-	-	-	-	-	-	-	-	-	-	-	-	-	-	-	-	-	-	-	-	-	-	-	-	-	-	-
XMW0822*056	(1R,2S,6S,7S,8S)-8-Isopropyl-1-methyl-3-methylenetricyclo[4.4.0.02,7]decane-rel-	Terpenoids	C15H24	18252-44-3	-	-	-	-	-	-	-	-	-	-	-	-	-	-	-	-	-	-	-	-	-	-	-	-	-	-	-	-	-	-	-	-	-	-	-	-	-	-
NMW0319*423	2,6,10-Dodecatrienal, 3,7,11-trimethyl-, (E,E)-	Terpenoids	C15H24O	502-67-0	-	-	-	-	-	-	-	-	-	-	-	-	-	-	-	-	-	-	-	-	-	-	-	-	-	-	-	-	-	-	-	-	-	-	-	-	-	-
XMW0720*417	cis-p-Mentha-2,8-dien-1-ol	Terpenoids	C10H16O	3886-78-0	-	-	-	-	-	-	-	-	-	-	-	-	-	-	-	-	-	-	-	-	-	-	-	-	-	-	-	-	-	-	-	-	-	-	-	-	-	-
XMW0791*451	Phenol, 4-methyl-2-nitro-	Phenol	C7H7NO3	119-33-5	-	0.8	0.0144332	0.01346	0.013773	0.0147772	0.015935	0.013101	0.0145966	0.0140419	0.0142001	0.0143957	0.0125055	0.013073	0.00966002	0.0114225	0.0108747	0.0118612	0.0110219	0.0105328	0.0127453	0.0120455	0.016893	0.0127261	0.0130868	0.0122641	0.010464	0.0155911	0.010966	0.0125255	0.0119404	0.0143676	0.0145969	0.0130233	0.0125398	0.0126185	0.0137968	0.0117273
XMW0764*131	(S)-(-)-(4-Isopropenyl-1-cyclohexenyl)methanol	Terpenoids	C10H16O	18457-55-1	-	1.1	0.00832614	0.0195606	0.0178308	0.0173624	0.0169264	0.018074	0.00949616	0.0196135	0.00766216	0.0108371	0.00930559	0.0165638	0.00711006	0.010611	0.0139276	0.0158814	0.00917317	0.0088622	0.0214785	0.0244364	0.028357	0.0229336	0.0225547	0.0224693	0.00787442	0.00889254	0.00921238	0.00803482	0.0086876	0.00826206	0.00865399	0.0079915	0.00995303	0.00957546	0.00838125	0.00907031
NMW0382*346	trans-Ferulic acid	Acid	C10H10O4	537-98-4	-	-	-	-	-	-	-	-	-	-	-	-	-	-	-	-	-	-	-	-	-	-	-	-	-	-	-	-	-	-	-	-	-	-	-	-	-	-
XMW0746*118	(1R,2R,4S,6S,7S,8S)-8-Isopropyl-1-methyl-3-methylenetricyclo[4.4.0.02,7]decan-4-ol	Terpenoids	C15H24O	124753-76-0	-	-	-	-	-	-	-	-	-	-	-	-	-	-	-	-	-	-	-	-	-	-	-	-	-	-	-	-	-	-	-	-	-	-	-	-	-	-
NMW0394*346	2-Propenoic acid, 3-(4-hydroxy-3-methoxyphenyl)-	Acid	C10H10O4	1135-24-6	-	13	0.000539618	0.000904757	0.000627696	0.000507649	0.000511127	0.000645372	0.000533278	0.000540536	0.000309187	0.000518178	0.000479349	0.000468145	0.000240996	0.00047946	0.000668626	0.000611785	0.000573345	0.000466308	0.00058297	0.00065758	0.000950872	0.000656671	0.000810666	0.000810547	0.000591412	0.000586763	0.000392625	0.000167563	0.000674302	0.000516142	0.000311601	0.000668976	0.000481485	0.00030708	0.00049628	0.000483951
XMW0528*262	Thiophene, 2-butyl-	Heterocyclic compound	C8H12S	1455-20-5	fruity, floral, milky, fried, chicken	-	-	-	-	-	-	-	-	-	-	-	-	-	-	-	-	-	-	-	-	-	-	-	-	-	-	-	-	-	-	-	-	-	-	-	-	-
QWMW1175*149	Phenol, 2,5-dimethyl-	Phenol	C8H10O	95-87-4	sweet, naphthyl, phenol, smoky, bacon	0.4	0.258267	0.262276	0.214859	0.28168	0.108811	0.196413	0.22589	0.208961	0.248813	0.229445	0.241428	0.199554	0.468648	0.521135	0.0597645	0.198552	0.377292	0.434863	0.472462	0.0613173	0.601413	0.507166	0.402712	0.369223	0.450683	0.519521	0.479132	0.474938	0.490649	0.499433	0.457699	0.467462	0.406582	0.483318	0.491019	0.488723
XMW0389*382	Caryophyllenyl alcohol	Terpenoids	C15H26O	913176-41-7	-	-	-	-	-	-	-	-	-	-	-	-	-	-	-	-	-	-	-	-	-	-	-	-	-	-	-	-	-	-	-	-	-	-	-	-	-	-
QWMW1238*308	Carvone oxide, cis-	Terpenoids	C10H14O2	18383-49-8	sweet, caraway, minty, spearmint, spicy	-	-	-	-	-	-	-	-	-	-	-	-	-	-	-	-	-	-	-	-	-	-	-	-	-	-	-	-	-	-	-	-	-	-	-	-	-
XMW0366*027	Benzene, 1,2,3,5-tetramethyl-	Aromatics	C10H14	527-53-7	-	-	-	-	-	-	-	-	-	-	-	-	-	-	-	-	-	-	-	-	-	-	-	-	-	-	-	-	-	-	-	-	-	-	-	-	-	-
XMW0312*006	Ethylbenzene	Aromatics	C8H10	100-41-4	-	2.20525	0.0351298	0.0339241	0.031532	0.0355344	0.0351774	0.0323243	0.0263068	0.0266923	0.0232327	0.0260947	0.0248626	0.0245385	0.0248541	0.0240369	0.0231375	0.0233511	0.0218443	0.0263872	0.0284465	0.0263246	0.0298712	0.025207	0.0246213	0.0245268	0.0264905	0.0269817	0.0252812	0.0254377	0.0243982	0.0267853	0.0226495	0.0226524	0.0225047	0.0229919	0.0228663	0.0232948
XMW0307*006	p-Xylene	Aromatics	C8H10	106-42-3	strong, sweetish	1	0.0239709	0.0230924	0.02056	0.0205489	0.0221083	0.0217587	0.0241297	0.0260431	0.0240952	0.0241896	0.0240603	0.0208851	0.0168762	0.0186176	0.0144678	0.0144247	0.016397	0.0174535	0.0182731	0.0149066	0.0178881	0.0190435	0.0178327	0.016395	0.0163535	0.0184056	0.0183541	0.0166336	0.0195805	0.0186236	0.0238547	0.0264497	0.0230221	0.0247559	0.0261669	0.025947
XMW0295*246	Benzene, 1-methyl-3-(1-methylethenyl)-	Aromatics	C10H12	1124-20-5	-	-	-	-	-	-	-	-	-	-	-	-	-	-	-	-	-	-	-	-	-	-	-	-	-	-	-	-	-	-	-	-	-	-	-	-	-	-
WAMW0211*399	Benzene, 1-methoxy-4-methyl-	Ether	C8H10O	104-93-8	naphthyl, cresol, ylang-ylang, powdery, nutty	0.2	0.0624363	0.0545087	0.0507544	0.0564692	0.0556554	0.0535579	0.047727	0.0441509	0.0422443	0.0428872	0.0365822	0.0433756	0.0381319	0.043513	0.0400394	0.0474244	0.0353648	0.0452701	0.0501051	0.0505646	0.0719055	0.0514866	0.0533002	0.0568337	0.0367746	0.0345554	0.0364384	0.0403581	0.0335713	0.0292968	0.0341307	0.0306532	0.0312741	0.0305195	0.0327233	0.0293064
XMW0281*292	Decane, 5-methyl-	Hydrocarbons	C11H24	13151-35-4	-	-	-	-	-	-	-	-	-	-	-	-	-	-	-	-	-	-	-	-	-	-	-	-	-	-	-	-	-	-	-	-	-	-	-	-	-	-
WAMW0399*353	1-Tetradecene	Hydrocarbons	C14H28	1120-36-1	mild pleasant	2	0.136424	0.157209	0.137329	0.152336	0.157705	0.155618	0.135549	0.148148	0.136712	0.137968	0.139617	0.140436	0.119932	0.12917	0.12895	0.12777	0.129726	0.126634	0.152363	0.151972	0.213902	0.169779	0.159261	0.164728	0.0839339	0.0972269	0.0895101	0.091837	0.0884133	0.0976385	0.0855185	0.084245	0.0870917	0.088953	0.0894774	0.086166
XMW0525*026	Benzene, 1-ethenyl-3,5-dimethyl-	Aromatics	C10H12	5379-20-4	-	-	-	-	-	-	-	-	-	-	-	-	-	-	-	-	-	-	-	-	-	-	-	-	-	-	-	-	-	-	-	-	-	-	-	-	-	-
QWMW0954*418	Phenol, 3,4-dimethoxy-	Phenol	C8H10O3	2033-89-8	smoky	-	-	-	-	-	-	-	-	-	-	-	-	-	-	-	-	-	-	-	-	-	-	-	-	-	-	-	-	-	-	-	-	-	-	-	-	-
XMW0517*395	Thiophene, 3-ethyl-	Heterocyclic compound	C6H8S	1795-01-3	styrene	3	0.0110603	0.0124929	0.0107886	0.0114003	0.0117634	0.0114046	0.0105049	0.0112072	0.0103095	0.0108383	0.0118481	0.0105005	0.0102118	0.0113125	0.0105264	0.010593	0.0105432	0.0104165	0.0107685	0.011346	0.0117024	0.0122134	0.0114434	0.0125919	0.0109981	0.0124104	0.0115641	0.0117637	0.0115499	0.0121887	0.0106298	0.0116303	0.0120897	0.0107358	0.0116018	0.0108723
XMW0513*073	9,12,15-Octadecatrienoic acid, methyl ester, (Z,Z,Z)-	Ester	C19H32O2	301-00-8	-	0.45	0.0659954	0.0802746	0.0681304	0.0694404	0.0735477	0.0714383	0.115976	0.106658	0.116096	0.104428	0.0837857	0.0875223	0.0732691	0.100135	0.0995816	0.086406	0.0850725	0.0914597	0.0866966	0.0889136	0.123471	0.105704	0.113482	0.118264	0.115858	0.0862129	0.0906146	0.132593	0.10633	0.100972	0.0662918	0.0775238	0.0587125	0.0735145	0.0837675	0.0742529
XMW0504*084	1H-Benzocycloheptene, 2,4a,5,6,7,8-hexahydro-3,5,5,9-tetramethyl-, (R)-	Terpenoids	C15H24	1461-03-6	-	-	-	-	-	-	-	-	-	-	-	-	-	-	-	-	-	-	-	-	-	-	-	-	-	-	-	-	-	-	-	-	-	-	-	-	-	-
XMW0502*426	Undecane, 3,8-dimethyl-	Hydrocarbons	C13H28	17301-30-3	-	-	-	-	-	-	-	-	-	-	-	-	-	-	-	-	-	-	-	-	-	-	-	-	-	-	-	-	-	-	-	-	-	-	-	-	-	-
QWMW0828*349	2-Naphthalenol, 1,2,3,4,4a,5,6,7-octahydro-2,5,5-trimethyl-	Terpenoids	C13H22O	41199-19-3	strong, substantive, ambergris, earthy, animalic	-	-	-	-	-	-	-	-	-	-	-	-	-	-	-	-	-	-	-	-	-	-	-	-	-	-	-	-	-	-	-	-	-	-	-	-	-
QWMW0979*287	Pyridine, 4-phenyl-	Heterocyclic compound	C11H9N	939-23-1	bitter, caramel	-	-	-	-	-	-	-	-	-	-	-	-	-	-	-	-	-	-	-	-	-	-	-	-	-	-	-	-	-	-	-	-	-	-	-	-	-
QWMW1060*439	Benzeneacetaldehyde, .alpha.-methyl-	Aldehyde	C9H10O	93-53-8	fresh, sharp, green, hyacinth, leafy, lilac	0.3	0.052013	0.052263	0.0460801	0.0391912	0.047692	0.0504312	0.0413502	0.053826	0.0399881	0.0423417	0.0384982	0.0382692	0.0903062	0.021927	0.0846131	0.0342275	0.0247016	0.0276624	0.0329043	0.0231429	0.0302553	0.0311174	0.0289861	0.0246658	0.0458617	0.0461258	0.0465985	0.0461939	0.043593	0.0452546	0.0176194	0.0161607	0.0151574	0.0190183	0.0191535	0.020227
XMW0027*458	Ledol	Terpenoids	C15H26O	577-27-5	-	-	-	-	-	-	-	-	-	-	-	-	-	-	-	-	-	-	-	-	-	-	-	-	-	-	-	-	-	-	-	-	-	-	-	-	-	-
KMW0225*186	3-Hexen-1-ol, (E)-	Alcohol	C6H12O	928-97-2	moss, fresh	0.11	0.467556	0.465955	0.453659	0.452218	0.551915	0.52931	0.469457	0.584907	0.530574	0.535773	0.425335	0.512032	0.386548	0.440218	0.406033	0.426741	0.513063	0.551615	0.455133	0.438933	0.53891	0.493096	0.462314	0.529984	0.417798	0.429631	0.415248	0.452944	0.3976	0.384211	0.432667	0.385735	0.385665	0.524332	0.492523	0.49576
D206*197	1,2-Cyclohexanedione	Ketone	C6H8O2	765-87-7	sweet, acorn, nut skin, maple, caramel, brothy	450	5.18999e-05	5.48912e-05	5.07101e-05	5.17483e-05	6.29256e-05	5.19969e-05	5.18185e-05	5.08071e-05	6.42966e-05	5.87082e-05	5.94194e-05	6.02779e-05	5.38986e-05	6.19636e-05	6.63551e-05	4.78093e-05	6.02038e-05	5.43749e-05	5.65441e-05	5.2876e-05	5.21895e-05	5.27366e-05	5.34739e-05	5.80157e-05	8.80161e-05	5.39134e-05	4.67382e-05	5.02026e-05	9.70708e-05	5.30903e-05	5.02715e-05	5.25024e-05	5.95889e-05	5.93566e-05	5.17308e-05	5.15918e-05
YZMW0707*271	1-Naphthalenol	Phenol	C10H8O	90-15-3	-	4	0.00188666	0.00189361	0.00165118	0.00194919	0.00178713	0.00185428	0.00403409	0.00406317	0.00375471	0.0036936	0.00384791	0.00390581	0.00694993	0.00731743	0.00731794	0.00802438	0.00705751	0.00728956	0.0114593	0.0128887	0.0175298	0.011636	0.0114677	0.0123093	0.0272891	0.0285228	0.0267981	0.0302813	0.0281393	0.0284608	0.0334835	0.0324968	0.0335839	0.0328827	0.0316084	0.0324701
YZMW0700*305	Phenol, 2-(1,1-dimethylethyl)-5-methyl-	Phenol	C11H16O	88-60-8	-	0.5	0.898865	0.914077	0.852239	0.928503	0.936408	0.893137	0.816105	0.863144	0.767371	0.804471	0.760754	0.831074	0.729252	0.824483	0.817851	0.87009	0.821776	0.802857	0.702892	0.820847	0.991291	0.776288	0.759725	0.788828	0.474925	0.507267	0.470795	0.518073	0.50031	0.496699	0.520231	0.519657	0.523096	0.539484	0.501946	0.520178
GMW0286*412	Benzaldehyde, 2-methoxy-	Aldehyde	C8H8O2	135-02-4	sweet, powdery, hawthorn, guaiacol, vanilla, acetophenone, almond	0.174	0.0455248	0.0532685	0.0487457	0.046427	0.0511388	0.0465457	0.0409543	0.0533399	0.046076	0.0461529	0.0467439	0.0480993	0.0550919	0.0549975	0.0627933	0.0331949	0.0735713	0.0692004	0.0594575	0.0386506	0.0793673	0.0724288	0.064493	0.0652373	0.0415895	0.058833	0.0412636	0.0506717	0.0591979	0.0610494	0.0617719	0.049887	0.0513521	0.0611355	0.055814	0.0496517
XMW3798*413	Benzoic acid, 3-amino-	Acid	C7H7NO2	99-05-8	-	1100	2.55636e-05	2.92876e-05	2.55166e-05	3.00435e-05	3.14068e-05	3.00493e-05	3.35776e-05	3.38722e-05	3.19087e-05	3.32765e-05	3.37874e-05	3.49798e-05	4.30582e-05	4.47357e-05	4.8396e-05	5.21208e-05	4.5325e-05	4.62097e-05	5.53246e-05	6.55811e-05	9.13286e-05	6.0918e-05	6.16608e-05	6.67424e-05	7.69597e-05	8.23304e-05	7.6956e-05	8.56071e-05	7.99305e-05	8.00709e-05	6.68756e-05	6.43742e-05	7.07497e-05	6.57154e-05	6.41646e-05	6.45302e-05
YZMW0280*327	Phenol, 2,5-bis(1-methylethyl)-	Phenol	C12H18O	35946-91-9	-	0.1	0.200686	0.201349	0.183842	0.193461	0.199292	0.189616	0.27412	0.289698	0.263622	0.268553	0.27849	0.298625	0.447081	0.473288	0.459179	0.505516	0.439908	0.47244	0.852737	0.937765	1.2784	0.876049	0.902881	0.92522	1.24556	1.2938	1.15582	1.3327	1.23078	1.2327	1.27626	1.26777	1.26128	1.25279	1.12514	1.14459
D417*079	3-Hexen-1-ol, acetate, (E)-	Ester	C8H14O2	3681-82-1	sharp, fruity, green, cortex, hyacinth, narcissus, rummy, unripe banana, pear	0.87	0.0084929	0.00839321	0.00650283	0.0086555	0.00698541	0.00827992	0.00530047	0.00654346	0.00465693	0.0048992	0.00461293	0.00586557	0.00523245	0.00678156	0.00661674	0.00642136	0.00926459	0.00663789	0.00472219	0.00410414	0.0058491	0.00452693	0.00574933	0.00588582	0.00438454	0.00514287	0.00608033	0.00602277	0.00617211	0.00431359	0.00490451	0.00425152	0.00441906	0.00574092	0.00467723	0.00585888
YZMW0698*350	Phenol, 2,4,6-trichloro-	Phenol	C6H3Cl3O	88-06-2	-	0.00016	976.27	1002.05	938.391	1012.52	1010.09	960.697	894.64	957.245	849.738	898.325	835.243	907.02	793.914	832.565	845.648	907.851	824.531	861.33	834.988	855.003	1101.45	873.296	844.182	901.448	505.136	562.084	507.124	550.112	549.518	543.496	563.732	556.549	559.599	584.22	551.509	560.425
YC_1381*289	Naphthalene, 1,3-dimethyl-	Aromatics	C12H12	575-41-7	-	0.042	2.23073	2.28768	2.13251	2.37247	2.38588	2.25504	2.22461	2.39267	2.15163	2.25239	2.15677	2.3193	2.28738	2.37953	2.52879	2.77884	2.46541	2.45555	3.09504	3.46529	5.28813	3.2361	3.23486	3.52359	1.83232	1.97938	1.82136	1.94365	1.87169	1.94652	2.47979	2.41211	2.34549	2.58875	2.21078	2.28597
GMW0247*278	m-Cresyl acetate	Ester	C9H10O2	122-46-3	powerful, pungent, floral, narcissus, phenol	-	-	-	-	-	-	-	-	-	-	-	-	-	-	-	-	-	-	-	-	-	-	-	-	-	-	-	-	-	-	-	-	-	-	-	-	-
YZMW0460*298	Phenol, 2,5-dichloro-	Phenol	C6H4Cl2O	583-78-8	-	0.03	0.555283	0.498408	0.521229	0.597233	0.533373	0.543361	0.49523	0.592538	0.52541	0.525182	0.526675	0.516457	0.511924	0.561051	0.59323	0.71022	0.500524	0.556738	0.92184	0.95094	0.999058	0.955313	0.885033	0.933108	0.552134	0.543763	0.563706	0.550546	0.590886	0.495802	0.471079	0.454672	0.390516	0.447355	0.46264	0.437219
D431*457	(3R,3aR,3bR,4S,7R,7aR)-4-Isopropyl-3,7-dimethyloctahydro-1H-cyclopenta[1,3]cyclopropa[1,2]benzen-3-ol	Terpenoids	C15H26O	38230-60-3	-	-	-	-	-	-	-	-	-	-	-	-	-	-	-	-	-	-	-	-	-	-	-	-	-	-	-	-	-	-	-	-	-	-	-	-	-	-
D193*131	p-Mentha-1,8-dien-7-ol	Terpenoids	C10H16O	536-59-4	green, cumin, spicy, aromatic, woody, cardamom, floral, waxy, violet	7	0.00258196	0.00291222	0.00242431	0.00223345	0.00251049	0.00278473	0.00265621	0.00264499	0.00256595	0.00268554	0.00268859	0.00300323	0.00260482	0.00235048	0.00138424	0.00256522	0.00246461	0.00262468	0.00258884	0.00223957	0.00369572	0.00257354	0.0023783	0.00237628	0.00276672	0.00325535	0.00313971	0.00353388	0.00295397	0.00339863	0.00341362	0.00319137	0.0038377	0.00390968	0.00378237	0.00316884
D408*420	(1Alpha,3beta,4beta)-p-menthane-3,8-diol	Terpenoids	C10H20O2	3564-95-2	-	-	-	-	-	-	-	-	-	-	-	-	-	-	-	-	-	-	-	-	-	-	-	-	-	-	-	-	-	-	-	-	-	-	-	-	-	-
D333*348	(+)-cis-Verbenol, acetate	Ester	C12H18O2	29135-27-1	-	-	-	-	-	-	-	-	-	-	-	-	-	-	-	-	-	-	-	-	-	-	-	-	-	-	-	-	-	-	-	-	-	-	-	-	-	-
D1660*437	5-Hexen-1-ol	Alcohol	C6H12O	821-41-0	-	1	0.0175221	0.0205882	0.0186554	0.0177604	0.017559	0.0185928	0.0179132	0.0178672	0.0181493	0.0173826	0.0193211	0.0187339	0.0180062	0.0199914	0.0173833	0.0170421	0.0180491	0.0163178	0.0191645	0.0171627	0.0164529	0.0168432	0.0172098	0.0178511	0.0169359	0.0167618	0.0160303	0.0162957	0.0170716	0.017255	0.0144566	0.0169825	0.0166728	0.0160289	0.0162604	0.0157223
D400*124	11-Tetradecen-1-ol, (E)-	Alcohol	C14H28O	35153-18-5	-	-	-	-	-	-	-	-	-	-	-	-	-	-	-	-	-	-	-	-	-	-	-	-	-	-	-	-	-	-	-	-	-	-	-	-	-	-
w08*082	Naphthalene, 1-methyl-	Aromatics	C11H10	90-12-0	naphthyl, chemical, medicinal, camphor	0.008	31.41	31.7666	29.3575	32.1302	31.8864	31.1825	27.565	29.2503	26.3676	27.5669	25.6799	28.8409	20.8821	22.2273	23.3127	24.5177	22.2222	23.0195	30.6985	32.541	42.7663	32.4992	32.1185	33.6875	14.0137	15.5581	14.7282	15.1773	14.8932	14.9956	15.8578	15.7095	16.0118	16.2369	16.1677	16.3691
w05*423	2,6,10-Dodecatrienal, 3,7,11-trimethyl-	Terpenoids	C15H24O	19317-11-4	floral, minty	-	-	-	-	-	-	-	-	-	-	-	-	-	-	-	-	-	-	-	-	-	-	-	-	-	-	-	-	-	-	-	-	-	-	-	-	-
D1625*296	3-Octanol, 3,7-dimethyl-	Alcohol	C10H22O	78-69-3	lilac, oily, lily, tea, floral, bois de rose, woody	-	-	-	-	-	-	-	-	-	-	-	-	-	-	-	-	-	-	-	-	-	-	-	-	-	-	-	-	-	-	-	-	-	-	-	-	-
D339*137	cis-.alpha.-Bisabolene	Terpenoids	C15H24	29837-07-8	-	-	-	-	-	-	-	-	-	-	-	-	-	-	-	-	-	-	-	-	-	-	-	-	-	-	-	-	-	-	-	-	-	-	-	-	-	-
XMW3574*314	Ethyl (E)-2-octenoate	Ester	C10H18O2	7367-82-0	fruity, pear skin, green, waxy, tropical, plum skin, fatty	-	-	-	-	-	-	-	-	-	-	-	-	-	-	-	-	-	-	-	-	-	-	-	-	-	-	-	-	-	-	-	-	-	-	-	-	-
D439*290	Cyclohexanol, 1-methyl-4-(1-methylethyl)-, trans-	Terpenoids	C10H20O	3901-93-7	-	-	-	-	-	-	-	-	-	-	-	-	-	-	-	-	-	-	-	-	-	-	-	-	-	-	-	-	-	-	-	-	-	-	-	-	-	-
GMW0218*419	10-Undecen-1-ol	Alcohol	C11H22O	112-43-6	fresh, floral, waxy, ozonous, clean, citrus	-	-	-	-	-	-	-	-	-	-	-	-	-	-	-	-	-	-	-	-	-	-	-	-	-	-	-	-	-	-	-	-	-	-	-	-	-
D398*385	5-Tetradecen-1-ol, acetate, (Z)-	Ester	C16H30O2	35153-13-0	-	-	-	-	-	-	-	-	-	-	-	-	-	-	-	-	-	-	-	-	-	-	-	-	-	-	-	-	-	-	-	-	-	-	-	-	-	-
D440*290	Cyclohexanol, 1-methyl-4-(1-methylethyl)-, cis-	Terpenoids	C10H20O	3901-95-9	-	-	-	-	-	-	-	-	-	-	-	-	-	-	-	-	-	-	-	-	-	-	-	-	-	-	-	-	-	-	-	-	-	-	-	-	-	-
D685*255	2-Methyl-3-propylpyrazine	Heterocyclic compound	C8H12N2	15986-80-8	-	0.06	0.479034	0.485514	0.498062	0.478299	0.46031	0.465614	0.483514	0.557834	0.499502	0.521474	0.486487	0.497542	0.481629	0.473236	0.487934	0.485264	0.463684	0.47682	0.441279	0.445967	0.476939	0.483195	0.451838	0.427159	0.406309	0.448465	0.407637	0.417616	0.456629	0.402508	0.416669	0.422122	0.412509	0.439401	0.412496	0.4256
YZMW0195*416	Benzoic acid, 2-amino-4-methyl-	Acid	C8H9NO2	2305-36-4	-	756	3.75755e-05	4.02476e-05	3.48558e-05	4.00961e-05	2.50865e-05	4.0976e-05	8.38265e-05	8.36922e-05	7.46384e-05	7.82034e-05	7.62473e-05	8.2909e-05	0.000138525	0.000148775	0.000151257	0.000170776	0.000148553	0.000151752	0.000207056	0.00023341	0.000334648	0.000222656	0.000222128	0.000236869	0.000557268	0.000587348	0.000543893	0.000613025	0.000578685	0.000568566	0.000722869	0.000702813	0.000717308	0.000712843	0.000680355	0.000695898
D26*145	Pentanoic acid, 3-methylbutyl ester	Ester	C10H20O2	2050-09-1	fruity, ripe apple, green	0.1	0.163174	0.179733	0.171786	0.165871	0.164699	0.172078	0.140828	0.163254	0.14704	0.1586	0.154024	0.149309	0.133547	0.141214	0.134705	0.129669	0.135922	0.131639	0.130896	0.113363	0.131604	0.130205	0.127802	0.122087	0.065235	0.0767727	0.0774307	0.0716662	0.0857712	0.0798923	0.0869437	0.0909582	0.0802819	0.0906632	0.101918	0.0923115
GMW0087*455	2-Decenal, (E)-	Aldehyde	C10H18O	3913-81-3	waxy, fatty, earthy, green, cilantro, mushroom, aldehydic, fried, chicken, fatty, tallow	0.005	25.1408	27.594	25.9092	26.2327	25.9971	25.5658	20.1585	21.3248	19.8128	20.0727	20.2714	20.6943	21.5063	22.9633	37.3912	26.3989	25.1394	23.4703	25.8591	40.639	31.027	27.8711	29.5887	27.6561	13.1915	15.7648	15.3853	14.9368	14.2907	14.9604	18.891	18.1484	19.8527	20.1536	19.8713	19.2775
YZMW0497*223	1,3-Benzenediol, 2-methyl-	Alcohol	C7H8O2	608-25-3	-	620	2.83989e-05	2.65097e-05	2.26305e-05	2.41478e-05	2.54238e-05	2.55275e-05	2.36174e-05	2.56483e-05	2.49636e-05	2.69494e-05	2.62545e-05	2.21593e-05	2.09e-05	2.30535e-05	1.75386e-05	1.78102e-05	1.91505e-05	1.92258e-05	2.27494e-05	2.22879e-05	2.68877e-05	2.73236e-05	2.41661e-05	2.48937e-05	1.60151e-05	1.70269e-05	1.5669e-05	1.73878e-05	1.8133e-05	1.85607e-05	1.9878e-05	2.20464e-05	2.08534e-05	2.13753e-05	2.0346e-05	1.88643e-05
D293*137	Cyclohexene, 4-[(1E)-1,5-dimethyl-1,4-hexadien-1-yl]-1-methyl-	Terpenoids	C15H24	25532-79-0	-	-	-	-	-	-	-	-	-	-	-	-	-	-	-	-	-	-	-	-	-	-	-	-	-	-	-	-	-	-	-	-	-	-	-	-	-	-
D290*080	2-Butanone, 4-phenyl-	Ketone	C10H12O	2550-26-7	floral, balsamic	2.5	0.00380662	0.00302631	0.00357622	0.00407371	0.00353015	0.00324841	0.00261535	0.00330576	0.00285215	0.00343315	0.00292312	0.00331194	0.00189689	0.00190934	0.00296359	0.00278631	0.00250379	0.00245344	0.00242788	0.00332269	0.00289557	0.00320201	0.0026492	0.00307151	0.00206375	0.00287295	0.00244604	0.00239962	0.00264863	0.00298996	0.00315741	0.00271251	0.00281967	0.00282888	0.0028268	0.00278249
YZMW0165*248	1H-Indol-5-ol	Alcohol	C8H7NO	1953-54-4	-	0.13	0.12365	0.153672	0.133473	0.168969	0.151122	0.152309	0.174948	0.197586	0.164746	0.174448	0.177941	0.187196	0.189451	0.20347	0.211538	0.240514	0.213149	0.196068	0.205919	0.252386	0.333706	0.213568	0.222305	0.247082	0.200389	0.213997	0.189132	0.219002	0.204397	0.195584	0.153135	0.142944	0.154613	0.155774	0.163604	0.14795
D289*145	n-Amyl isovalerate	Ester	C10H20O2	25415-62-7	apple, fresh fruit	12	0.00191926	0.00165	0.00147695	0.00176969	0.00182012	0.00171824	0.00171231	0.00155035	0.00149797	0.00167579	0.00146884	0.0017841	0.0012325	0.00133619	0.00129959	0.00142837	0.00135135	0.00148528	0.00190864	0.00222533	0.00306298	0.00204041	0.00193087	0.00224781	0.00247046	0.00218189	0.00205652	0.00239779	0.00205297	0.00231704	0.00141039	0.00146074	0.00153795	0.00141491	0.00140144	0.00142276
D85*342	Butanoic acid, 3-methyl-, hexyl ester	Ester	C11H22O2	10032-13-0	sweet, green fruit, apple, unripe apple skin, strawberry	-	-	-	-	-	-	-	-	-	-	-	-	-	-	-	-	-	-	-	-	-	-	-	-	-	-	-	-	-	-	-	-	-	-	-	-	-
YZMW0147*345	4,6-Dichloro-guaiacol	Phenol	C7H6Cl2O2	16766-31-7	-	0.0115	2.68978	3.01595	2.73914	3.11749	3.0091	2.8356	2.75428	2.95045	2.66301	2.61543	2.6603	2.7273	2.63563	2.67845	2.78831	2.80695	2.78743	2.62172	2.84166	2.94367	4.09308	2.93426	2.95946	3.08548	1.95809	2.27659	2.27034	2.28395	2.09851	2.341	1.93165	2.16307	2.20994	2.12222	2.04637	2.0815
YZMW0075*340	4-Decenoic acid, methyl ester	Ester	C11H20O2	1191-02-2	-	0.2	0.560452	0.604381	0.536371	0.585864	0.591686	0.590108	0.553267	0.576339	0.547595	0.548676	0.543024	0.554204	0.406332	0.419336	0.411354	0.444652	0.435205	0.421056	0.457199	0.465308	0.654024	0.472881	0.457216	0.478031	0.466715	0.542332	0.498318	0.506236	0.504426	0.529524	0.545487	0.563597	0.557118	0.573521	0.572189	0.576158
YZMW0204*305	Phenol, 2-(1,1-dimethylethyl)-4-methyl-	Phenol	C11H16O	2409-55-4	-	0.03	1.92916	2.15632	1.91502	2.16083	2.12529	2.06913	1.66217	1.75812	1.59603	1.732	1.61633	1.74913	1.65951	1.74109	1.76248	1.8576	1.68791	1.74909	2.15978	2.2365	3.1305	2.22827	2.20885	2.32529	1.76158	1.90469	1.80384	2.12408	1.95322	1.94499	1.8522	1.88508	1.90692	1.83781	1.84946	1.81125
YZMW0467*299	Phenol, 3,5-dichloro-	Phenol	C6H4Cl2O	591-35-5	-	0.25	0.270566	0.289549	0.259874	0.286025	0.278412	0.291384	0.285308	0.301866	0.274429	0.283894	0.282877	0.287668	0.2578	0.28291	0.283607	0.287916	0.274791	0.2898	0.237007	0.253961	0.334675	0.256944	0.246228	0.254989	0.196324	0.226457	0.20903	0.218318	0.21405	0.213089	0.208495	0.207783	0.216627	0.218295	0.229534	0.214543
YZMW0226*327	Phenol, 2,4-bis(1-methylethyl)-	Phenol	C12H18O	2934-05-6	-	0.00091	76.7928	85.8566	76.7187	80.4532	83.2755	85.8591	71.4372	76.7163	67.9768	70.6556	72.9022	72.4554	63.9068	66.8536	66.359	64.5464	68.0936	61.2636	68.9591	68.7599	101.858	65.6353	69.9196	77.2476	64.3441	70.5134	68.882	69.9998	67.6077	70.5836	68.4037	67.577	67.4923	69.6132	69.9164	67.4857
D314*067	8-Dodecen-1-ol, acetate, (Z)-	Ester	C14H26O2	28079-04-1	-	-	-	-	-	-	-	-	-	-	-	-	-	-	-	-	-	-	-	-	-	-	-	-	-	-	-	-	-	-	-	-	-	-	-	-	-	-
D219*412	Benzaldehyde, 4-methoxy-	Aldehyde	C8H8O2	123-11-5	sweet, powdery, mimosa, floral, hawthorn, balsamic	0.0002	84.9738	76.9719	68.3305	81.5605	81.0576	73.7749	53.1161	55.1677	55.1745	63.5184	52.026	54.3063	84.2656	89.3256	60.5345	66.2244	53.4309	55.5287	79.7107	73.1701	45.4569	103.942	59.4991	56.2464	71.627	80.7031	77.2939	77.3651	69.9284	73.8217	56.0046	70.9657	62.7842	69.65	65.0227	59.5584
D259*254	Phenol, 2,3,6-trimethyl-	Phenol	C9H12O	2416-94-6	-	-	-	-	-	-	-	-	-	-	-	-	-	-	-	-	-	-	-	-	-	-	-	-	-	-	-	-	-	-	-	-	-	-	-	-	-	-
D452*308	Carvone oxide, trans-	Terpenoids	C10H14O2	39903-97-4	-	-	-	-	-	-	-	-	-	-	-	-	-	-	-	-	-	-	-	-	-	-	-	-	-	-	-	-	-	-	-	-	-	-	-	-	-	-
D244*457	(3S,3aR,3bR,4S,7R,7aR)-4-Isopropyl-3,7-dimethyloctahydro-1H-cyclopenta[1,3]cyclopropa[1,2]benzen-3-ol	Terpenoids	C15H26O	23445-02-5	spicy, minty	-	-	-	-	-	-	-	-	-	-	-	-	-	-	-	-	-	-	-	-	-	-	-	-	-	-	-	-	-	-	-	-	-	-	-	-	-
YZMW0569*197	1,4-Cyclohexanedione	Ketone	C6H8O2	637-88-7	-	670	0.000107655	8.90309e-05	6.61505e-05	8.39881e-05	8.46373e-05	8.16328e-05	9.27399e-05	9.11278e-05	0.000103027	0.000100588	9.83198e-05	6.17149e-05	9.37624e-05	9.26203e-05	6.47315e-05	8.03315e-05	8.60098e-05	6.56741e-05	9.42125e-05	8.14746e-05	6.29693e-05	9.01384e-05	7.55977e-05	7.86366e-05	8.1459e-05	9.45635e-05	8.69952e-05	0.00010161	8.11253e-05	8.82913e-05	9.97369e-05	9.65162e-05	5.47744e-05	0.000102874	9.74371e-05	9.21026e-05
YZMW0073*288	Benzoic acid, 2-chloro-	Acid	C7H5ClO2	118-91-2	-	7830	2.46242e-06	2.52636e-06	2.61452e-06	2.46676e-06	2.58181e-06	2.24954e-06	1.7242e-06	2.37175e-06	1.7164e-06	1.7306e-06	1.59274e-06	1.96982e-06	2.65726e-06	2.63623e-06	3.45786e-06	3.15814e-06	2.61837e-06	2.73496e-06	2.47648e-06	2.68303e-06	3.53458e-06	2.60778e-06	2.51702e-06	2.84068e-06	2.72028e-06	3.04485e-06	2.86114e-06	2.95876e-06	2.95221e-06	2.86812e-06	2.75916e-06	2.86376e-06	2.79342e-06	2.91892e-06	2.83718e-06	2.70351e-06
D329*114	Myroxide	Terpenoids	C10H16O	28977-57-3	-	-	-	-	-	-	-	-	-	-	-	-	-	-	-	-	-	-	-	-	-	-	-	-	-	-	-	-	-	-	-	-	-	-	-	-	-	-
YZMW0358*344	Benzoic acid, 2,6-dichloro-	Acid	C7H4Cl2O2	50-30-6	-	955	2.4417e-05	2.47317e-05	2.39876e-05	2.91007e-05	2.57513e-05	2.61777e-05	3.04948e-05	3.25663e-05	2.69841e-05	2.95617e-05	2.91228e-05	3.06897e-05	3.13246e-05	3.22112e-05	3.5812e-05	3.99878e-05	3.47223e-05	3.38662e-05	4.36367e-05	5.21739e-05	7.64522e-05	4.85176e-05	4.85594e-05	5.4969e-05	6.29566e-05	6.72754e-05	6.27772e-05	6.80902e-05	6.56562e-05	6.7168e-05	8.2721e-05	7.80808e-05	7.97955e-05	8.1818e-05	7.77109e-05	7.77163e-05
D353*059	(S,1Z,6Z)-8-Isopropyl-1-methyl-5-methylenecyclodeca-1,6-diene	Terpenoids	C15H24	317819-80-0	-	-	-	-	-	-	-	-	-	-	-	-	-	-	-	-	-	-	-	-	-	-	-	-	-	-	-	-	-	-	-	-	-	-	-	-	-	-
KMW0218*089	Eucalyptol	Terpenoids	C10H18O	470-82-6	eucalyptus, herbal, camphor, medicinal	0.015	23.9407	24.3241	23.7467	23.8277	25.0006	23.7443	26.8991	30.9994	27.3188	27.6708	26.009	26.1164	16.3905	17.4924	16.7341	17.5781	18.08	18.5087	19.2607	18.516	20.2546	20.8924	20.249	19.1632	11.628	12.805	13.1305	12.87	12.5974	13.0511	20.1307	19.7157	18.8735	20.9472	20.8321	20.7839
KMW0107*007	2-Hexen-1-ol, (Z)-	Alcohol	C6H12O	928-94-9	green, cortex, leafy, green, beany, nasturtium, herbal, soapy, aldehydic, narcissus, narcissus, phenol	0.1	0.419293	0.393177	0.372503	0.340213	0.351428	0.36314	0.391804	0.434166	0.408193	0.417817	0.41523	0.365958	0.287128	0.326417	0.228882	0.244865	0.269931	0.287138	0.305507	0.250681	0.316938	0.326756	0.297015	0.295387	0.293166	0.321268	0.305464	0.3088	0.334309	0.308155	0.406395	0.455409	0.386536	0.438004	0.458525	0.456022
w38*056	1H-3a,7-Methanoazulene, octahydro-3,8,8-trimethyl-6-methylene-, [3R-(3.alpha.,3a.beta.,7.beta.,8a.alpha.)]-	Terpenoids	C15H24	546-28-1	-	-	-	-	-	-	-	-	-	-	-	-	-	-	-	-	-	-	-	-	-	-	-	-	-	-	-	-	-	-	-	-	-	-	-	-	-	-
D370*114	(Z)-2,2-Dimethyl-3-(3-methylpenta-2,4-dien-1-yl)oxirane	Terpenoids	C10H16O	33281-83-3	-	-	-	-	-	-	-	-	-	-	-	-	-	-	-	-	-	-	-	-	-	-	-	-	-	-	-	-	-	-	-	-	-	-	-	-	-	-
KMW0209*089	7-Oxabicyclo[2.2.1]heptane, 1-methyl-4-(1-methylethyl)-	Terpenoids	C10H18O	470-67-7	cool, pine, minty, camphor, terpene, green	1	0.0402813	0.0382638	0.0438571	0.0400215	0.045151	0.0451611	0.038846	0.0474644	0.041489	0.0434687	0.0405053	0.0429456	0.037962	0.0400018	0.0393597	0.0400367	0.042589	0.0425984	0.0486607	0.0463102	0.0584925	0.0573601	0.0506035	0.0533007	0.0489673	0.0563817	0.0542145	0.0549413	0.0552107	0.0513256	0.0522618	0.0541654	0.0562771	0.0597737	0.0641516	0.0549075
KMW0126*010	Pyrazine, 2,6-dimethyl-	Heterocyclic compound	C6H8N2	108-50-9	ethereal, cocoa, nutty, roasted, roasted, meaty, beefy, brown, coffee, buttermilky	10	0.00702519	0.00718621	0.00687808	0.00710113	0.00748036	0.00716829	0.00490782	0.00534808	0.00489201	0.00508165	0.00486873	0.00463187	0.00383272	0.00415149	0.00360554	0.00384467	0.00405834	0.00455904	0.00328199	0.00285139	0.00322912	0.00348777	0.00321168	0.00324355	0.00206109	0.00206819	0.00228753	0.00216797	0.00195286	0.00202375	0.00202904	0.00177735	0.00172813	0.00215607	0.00200589	0.00198389
KMW0198*257	.alpha.-Phellandrene	Terpenoids	C10H16	99-83-2	citrus, herbal, terpene, green, woody, peppery	0.04	0.457777	0.390145	0.34304	0.40806	0.408944	0.358092	0.236453	0.188626	0.17682	0.22333	0.18246	0.246207	0.0667937	0.0989499	0.0789519	0.0898406	0.0868627	0.0918423	0.128765	0.177531	0.228609	0.141281	0.145996	0.17134	0.0414136	0.0294844	0.0309295	0.0443208	0.0498527	0.0340802	0.0536603	0.0363129	0.065797	0.0307826	0.0429124	0.0564906
KMW0210*362	1H-Cyclopenta[1,3]cyclopropa[1,2]benzene, octahydro-7-methyl-3-methylene-4-(1-methylethyl)-, [3aS-(3a.alpha.,3b.beta.,4.beta.,7.alpha.,7aS*)]-	Terpenoids	C15H24	13744-15-5	citrus, fruity, radish	-	-	-	-	-	-	-	-	-	-	-	-	-	-	-	-	-	-	-	-	-	-	-	-	-	-	-	-	-	-	-	-	-	-	-	-	-
BPMW015*248	1H-Indol-4-ol	Alcohol	C8H7NO	2380-94-1	-	-	-	-	-	-	-	-	-	-	-	-	-	-	-	-	-	-	-	-	-	-	-	-	-	-	-	-	-	-	-	-	-	-	-	-	-	-
YZMW0369*344	Benzoic acid, 2,4-dichloro-	Acid	C7H4Cl2O2	50-84-0	-	190	2.87113e-05	3.00156e-05	2.66989e-05	3.24551e-05	3.05183e-05	3.02328e-05	9.29796e-05	9.25837e-05	8.44318e-05	8.6507e-05	8.45124e-05	9.24808e-05	0.000182431	0.000195245	0.000191691	0.000210932	0.000186915	0.000198596	0.000310858	0.000342726	0.000480594	0.000336507	0.000330315	0.000350155	0.000833086	0.000878826	0.000827635	0.000920598	0.000865274	0.000861071	0.000889464	0.000882301	0.000897978	0.000879119	0.00084602	0.000857476
w45*353	2-Tetradecene, (E)-	Hydrocarbons	C14H28	35953-54-9	-	-	-	-	-	-	-	-	-	-	-	-	-	-	-	-	-	-	-	-	-	-	-	-	-	-	-	-	-	-	-	-	-	-	-	-	-	-
D382*124	cis-11-Tetradecen-1-ol	Alcohol	C14H28O	34010-15-6	-	-	-	-	-	-	-	-	-	-	-	-	-	-	-	-	-	-	-	-	-	-	-	-	-	-	-	-	-	-	-	-	-	-	-	-	-	-
CY_077*289	Naphthalene, 2,7-dimethyl-	Aromatics	C12H12	582-16-1	-	0.042	0.216915	0.229565	0.219125	0.219691	0.233756	0.220249	0.210694	0.181425	0.157573	0.195343	0.159764	0.172858	0.149902	0.152154	0.153636	0.160166	0.153776	0.188751	0.206469	0.21491	0.237218	0.185259	0.197452	0.186594	0.16422	0.179021	0.153954	0.193125	0.181234	0.180346	0.163904	0.149181	0.149303	0.158776	0.154838	0.187389
KMW0176*228	5-Hepten-2-one, 6-methyl-	Ketone	C8H14O	110-93-0	herbal, green, citrus, musty, lemon grass	0.05	8.73414	8.86081	8.54985	8.73389	8.54473	8.515	5.06107	5.78427	4.93099	5.17095	4.88671	5.00174	7.8375	8.07593	8.0326	8.2945	8.32699	8.95445	6.92193	6.88238	7.48331	7.58492	7.08449	7.20867	5.57996	5.77719	6.04783	6.02283	5.9959	5.82779	6.91269	6.81687	6.71468	7.52337	7.81406	7.62684
KMW0088*005	2-Hexenal, (E)-	Aldehyde	C6H10O	6728-26-3	green, grassy	0.0031	1076.06	1225.81	1040.49	1125.18	1129.2	1105.99	1014.32	1080.34	1005.66	1043.51	1155.12	1026.63	1022.44	1120.33	1022.73	1006.64	1018.94	1000.27	1068.91	1054.07	1120	1201.05	1168.35	1238.85	1094.7	1194.93	1129.02	1152.06	1151.38	1187.88	1035.58	1129.53	1162.82	1060.77	1151.73	1058.44
KMW0095*005	2-Hexenal	Aldehyde	C6H10O	505-57-7	sweet, almond, fruity, green, leafy, apple, plum, vegetable	0.017	194.838	222.13	188.443	203.831	204.629	200.342	183.771	195.869	182.288	189.547	209.436	185.972	185.273	203.12	185.248	181.539	185.131	181.548	193.562	190.894	203.308	218.4	212.275	224.788	198.673	217.066	205.191	209.268	209.019	215.774	188.008	205.032	211.172	192.525	209.069	192.101
KMW0098*186	3-Hexen-1-ol, (Z)-	Alcohol	C6H12O	928-96-1	fresh, green, grass, foliage, vegetable, herbal, oily	0.05	0.326621	0.299315	0.268989	0.35479	0.290512	0.307936	0.328551	0.323188	0.324202	0.282924	0.264565	0.277671	0.305532	0.324996	0.21082	0.260345	0.22975	0.257239	0.335046	0.325228	0.345007	0.294666	0.356696	0.28748	0.201841	0.295865	0.300836	0.26992	0.195029	0.267179	0.294005	0.255225	0.221301	0.226633	0.266107	0.197785
D1049*095	Cyclohexanol, 5-methyl-2-(1-methylethyl)-, (1.alpha.,2.alpha.,5.beta.)-	Terpenoids	C10H20O	3623-51-6	-	0.4	0.0441707	0.0533225	0.0467754	0.0425785	0.043227	0.045191	0.0337725	0.0431738	0.0444491	0.0437109	0.045624	0.040337	0.0423889	0.0470751	0.0455224	0.0357556	0.0396441	0.0438984	0.0425076	0.035555	0.02253	0.0330347	0.0358987	0.0313258	0.026192	0.0373905	0.0345191	0.0313075	0.0317985	0.0334349	0.0359936	0.0440498	0.0490652	0.0437318	0.0457873	0.0439786
YZMW0354	Cycloheptanol	Alcohol	C7H14O	502-41-0	-	4.8	0.00736192	0.00649651	0.00619938	0.00640057	0.00648735	0.00672247	0.0081083	0.00768928	0.00673984	0.00689524	0.00717642	0.00692809	0.00648179	0.00638026	0.00483692	0.00503402	0.00490122	0.00571586	0.00610814	0.00500668	0.00671041	0.00623644	0.0055695	0.0057035	0.00417254	0.00424852	0.00384443	0.00460701	0.00432445	0.00381529	0.00470728	0.00438706	0.00371074	0.00430726	0.00418317	0.00403624
YZMW0490	Creatinine	Acid	C4H7N3O	60-27-5	-	3620	1.47611e-05	1.65072e-05	1.40893e-05	1.53924e-05	1.53308e-05	1.49489e-05	1.63629e-05	1.76879e-05	1.55632e-05	1.54195e-05	1.62542e-05	1.6911e-05	1.44822e-05	1.57413e-05	1.53917e-05	1.67732e-05	1.44216e-05	1.57982e-05	1.94133e-05	2.39284e-05	3.51117e-05	2.24987e-05	2.15088e-05	2.27937e-05	1.89409e-05	2.18946e-05	1.88393e-05	2.08611e-05	1.98393e-05	1.81861e-05	1.51189e-05	1.46279e-05	1.54254e-05	1.52669e-05	1.42854e-05	1.53357e-05
XMW0469	(1R,3aS,8aS)-7-Isopropyl-1,4-dimethyl-1,2,3,3a,6,8a-hexahydroazulene	Terpenoids	C15H24	36577-33-0	-	-	-	-	-	-	-	-	-	-	-	-	-	-	-	-	-	-	-	-	-	-	-	-	-	-	-	-	-	-	-	-	-	-	-	-	-	-
XMW0468	Bicyclo[3.1.1]hept-2-ene, 2,6-dimethyl-6-(4-methyl-3-pentenyl)-	Terpenoids	C15H24	17699-05-7	-	-	-	-	-	-	-	-	-	-	-	-	-	-	-	-	-	-	-	-	-	-	-	-	-	-	-	-	-	-	-	-	-	-	-	-	-	-
XMW0464	Benzoic acid, 2-(methylamino)-, methyl ester	Ester	C9H11NO2	85-91-6	fruity, musty, sweet, neroli, powdery, phenol, wine	0.0203	0.552191	0.554897	0.453443	0.655526	0.569984	0.805091	0.487822	0.557605	0.441867	0.50305	0.50151	0.501859	0.444359	0.403124	0.431628	0.533081	0.630545	0.388758	0.566693	0.604303	0.89354	0.544162	0.555932	0.480996	0.527495	0.543901	0.472213	0.566448	0.520161	0.51437	0.569108	0.556996	0.601151	0.557931	0.632537	0.547069
XMW0480	(Z)-Cinnamyl benzoate	Ester	C16H14O2	117204-78-1	-	-	-	-	-	-	-	-	-	-	-	-	-	-	-	-	-	-	-	-	-	-	-	-	-	-	-	-	-	-	-	-	-	-	-	-	-	-
XMW0472	1,2-Ethanediol, monobenzoate	Ester	C9H10O3	94-33-7	-	-	-	-	-	-	-	-	-	-	-	-	-	-	-	-	-	-	-	-	-	-	-	-	-	-	-	-	-	-	-	-	-	-	-	-	-	-
XMW0490	1-Methyl-2-phenylcyclopropane	Aromatics	C10H12	3145-76-4	-	-	-	-	-	-	-	-	-	-	-	-	-	-	-	-	-	-	-	-	-	-	-	-	-	-	-	-	-	-	-	-	-	-	-	-	-	-
XMW0497	2,5-Thiophenedicarboxaldehyde	Aldehyde	C6H4O2S	932-95-6	-	-	-	-	-	-	-	-	-	-	-	-	-	-	-	-	-	-	-	-	-	-	-	-	-	-	-	-	-	-	-	-	-	-	-	-	-	-
XMW0496	Hydrazine, (4-methoxyphenyl)-	Nitrogen compounds	C7H10N2O	3471-32-7	-	-	-	-	-	-	-	-	-	-	-	-	-	-	-	-	-	-	-	-	-	-	-	-	-	-	-	-	-	-	-	-	-	-	-	-	-	-
XMW0706	1,1'-Biphenyl, 3-methyl-	Aromatics	C13H12	643-93-6	green, rose	-	-	-	-	-	-	-	-	-	-	-	-	-	-	-	-	-	-	-	-	-	-	-	-	-	-	-	-	-	-	-	-	-	-	-	-	-
XMW0711	Formamide, N-phenyl-	Amine	C7H7NO	103-70-8	-	480	7.36737e-05	8.01824e-05	7.15537e-05	6.40639e-05	6.83695e-05	6.73523e-05	6.05111e-05	5.95558e-05	5.79695e-05	5.96074e-05	6.72293e-05	5.83599e-05	6.08101e-05	5.47093e-05	4.23578e-05	4.20783e-05	3.97918e-05	5.68975e-05	5.9195e-05	5.40782e-05	6.10977e-05	5.46269e-05	4.08369e-05	4.88652e-05	3.50004e-05	3.87651e-05	3.66554e-05	3.79613e-05	3.92546e-05	3.98458e-05	3.96956e-05	4.5874e-05	4.22943e-05	4.54611e-05	4.97686e-05	5.03299e-05
XMW0495	Dehydromevalonic lactone	Ester	C6H8O2	2381-87-5	-	-	-	-	-	-	-	-	-	-	-	-	-	-	-	-	-	-	-	-	-	-	-	-	-	-	-	-	-	-	-	-	-	-	-	-	-	-
XMW0494	Benzene, 1,4-dimethoxy-	Ether	C8H10O2	150-78-7	sweet, green, new-mown hay, fennel	-	-	-	-	-	-	-	-	-	-	-	-	-	-	-	-	-	-	-	-	-	-	-	-	-	-	-	-	-	-	-	-	-	-	-	-	-
XMW0473	Benzoic acid, hexyl ester	Ester	C13H18O2	6789-88-4	fresh, balsamic, sappy, woody	0.073	2.01554	3.17195	2.66542	2.86056	3.30808	3.36949	2.76738	3.0994	2.61491	2.71473	2.85893	3.06355	2.68094	2.70011	3.32329	3.07765	2.97054	2.73867	2.50256	3.58936	3.77131	2.61026	2.65271	3.11654	1.51567	1.92993	1.82133	2.08325	1.93505	1.97694	2.11445	2.02599	2.05636	2.13911	2.00183	1.92701
XMW0487	2-Picoline, 6-nitro-	Heterocyclic compound	C6H6N2O2	18368-61-1	-	-	-	-	-	-	-	-	-	-	-	-	-	-	-	-	-	-	-	-	-	-	-	-	-	-	-	-	-	-	-	-	-	-	-	-	-	-
XMW0486	Cyclohexanone, 2,2,6-trimethyl-	Ketone	C9H16O	2408-37-9	pungent, thujone, labdanum, honey, cistus	0.0001	146.727	181.166	152.786	222.127	91.8874	151.682	144.186	166.829	89.292	162.997	139.461	128.155	138.893	105.636	122.519	181.854	93.2216	144.519	146.009	130.28	84.6663	82.7585	64.6689	114.698	104.259	75.1138	87.408	167.477	188.122	107.885	64.8567	135.848	134.151	125.061	120.157	132.585
YZMW0493	1-Naphthalenol, 2,4-dinitro-	Phenol	C10H6N2O5	605-69-6	-	10	0.00141097	0.00143451	0.00105268	0.00136596	0.00133376	0.00122431	0.00185275	0.0018035	0.00138098	0.00129599	0.00122003	0.00137215	0.00122615	0.00103897	0.0007746	0.00109295	0.000621429	0.00101976	0.000997842	0.00110499	0.00141953	0.001396	0.00159488	0.00159116	0.00130365	0.00117977	0.00130609	0.00159867	0.00147619	0.00130682	0.00115323	0.0012933	0.000566996	0.000710981	0.000846054	0.000924119
XMW0477	Benzoic acid, 2-fluoro-4,5-dimethoxy-	Acid	C9H9FO4	79474-35-4	-	-	-	-	-	-	-	-	-	-	-	-	-	-	-	-	-	-	-	-	-	-	-	-	-	-	-	-	-	-	-	-	-	-	-	-	-	-
XMW0713	2-Cyclohexen-1-one, 3-methyl-	Ketone	C7H10O	1193-18-6	nutty, caramel, phenol, cherry	-	-	-	-	-	-	-	-	-	-	-	-	-	-	-	-	-	-	-	-	-	-	-	-	-	-	-	-	-	-	-	-	-	-	-	-	-
XMW0476	Benzoic acid, 2-(acetylamino)-, methyl ester	Ester	C10H11NO3	2719-08-6	mild, fruity, strawberry	-	-	-	-	-	-	-	-	-	-	-	-	-	-	-	-	-	-	-	-	-	-	-	-	-	-	-	-	-	-	-	-	-	-	-	-	-
YZMW0491	Aminocaproic acid	Acid	C6H13NO2	60-32-2	-	131000	7.90848e-08	7.24161e-08	5.75824e-08	6.62293e-08	7.25517e-08	6.86864e-08	8.01853e-08	6.36272e-08	5.514e-08	6.02162e-08	5.22617e-08	6.19418e-08	6.41856e-08	6.85249e-08	6.23145e-08	9.307e-08	6.34483e-08	6.41232e-08	7.25073e-08	7.68582e-08	1.19594e-07	7.68623e-08	7.70879e-08	8.61982e-08	7.69496e-08	7.39367e-08	6.63155e-08	8.00513e-08	7.41259e-08	7.53606e-08	8.89887e-08	8.99341e-08	8.36415e-08	8.75014e-08	7.60239e-08	8.12914e-08
XMW0642	Cyclohexanol, 3,5-dimethyl-	Alcohol	C8H16O	5441-52-1	-	-	-	-	-	-	-	-	-	-	-	-	-	-	-	-	-	-	-	-	-	-	-	-	-	-	-	-	-	-	-	-	-	-	-	-	-	-
XMW0462	2-Cyclopenten-1-one, 3-methyl-2-(2-pentenyl)-, (Z)-	Ketone	C11H16O	488-10-8	woody, herbal, floral, spicy, jasmin, celery	0.00026	8.89841	7.91989	7.92534	12.0395	10.029	8.70383	10.1498	12.2264	15.1661	7.02414	7.48714	11.6699	21.273	23.11	22.0474	28.6804	17.71	17.5431	23.9061	26.8524	42.692	28.5219	31.2067	29.3612	45.2827	48.2893	35.1292	47.5721	44.2048	43.3916	27.7641	28.9803	36.3335	30.888	33.1434	39.1543
YZMW0515	Benzeneacetic acid, 2-hydroxy-	Acid	C8H8O3	614-75-5	-	10	0.117686	0.137849	0.133778	0.15618	0.148457	0.143093	0.113409	0.137857	0.104098	0.110803	0.106161	0.123979	0.116565	0.106657	0.120215	0.118534	0.120705	0.11905	0.128431	0.153803	0.144535	0.143583	0.129384	0.137646	0.098887	0.10494	0.10592	0.10926	0.109253	0.117525	0.114599	0.113405	0.127632	0.121554	0.116703	0.118345
YZMW0525	2-Hydroxyoctanoic acid	Acid	C8H16O3	617-73-2	-	2400	9.10262e-05	0.000100003	9.0947e-05	0.000100518	9.85939e-05	9.57601e-05	6.98579e-05	8.68591e-05	6.58857e-05	7.14999e-05	7.68407e-05	7.12601e-05	9.78237e-05	0.000104954	0.000122814	0.000116175	0.000100634	0.000104743	0.000102579	0.000111381	0.000147585	0.000109679	0.000106489	0.000114691	0.00011382	0.000124719	0.000116796	0.000127568	0.000124925	0.000121316	0.000114431	0.00011522	0.000114575	0.00012006	0.00011503	0.000115584
XMW0394	Phenol, 4-(1-phenylethyl)-	Phenol	C14H14O	1988-89-2	-	-	-	-	-	-	-	-	-	-	-	-	-	-	-	-	-	-	-	-	-	-	-	-	-	-	-	-	-	-	-	-	-	-	-	-	-	-
XMW0734	Ethanone, 1-(2,4-dihydroxyphenyl)-	Ketone	C8H8O3	89-84-9	-	-	-	-	-	-	-	-	-	-	-	-	-	-	-	-	-	-	-	-	-	-	-	-	-	-	-	-	-	-	-	-	-	-	-	-	-	-
XMW0395	Methanone, diphenyl-, hydrazone	Nitrogen compounds	C13H12N2	5350-57-2	-	-	-	-	-	-	-	-	-	-	-	-	-	-	-	-	-	-	-	-	-	-	-	-	-	-	-	-	-	-	-	-	-	-	-	-	-	-
XMW0399	Diacetamide	Amine	C4H7NO2	625-77-4	-	-	-	-	-	-	-	-	-	-	-	-	-	-	-	-	-	-	-	-	-	-	-	-	-	-	-	-	-	-	-	-	-	-	-	-	-	-
XMW0404	2,5-Furandicarboxaldehyde	Aldehyde	C6H4O3	823-82-5	-	5	0.00491047	0.00464861	0.0050297	0.00498759	0.00559084	0.00486588	0.00447643	0.00566737	0.00431577	0.00486866	0.00455946	0.00407401	0.00521122	0.00546337	0.00547639	0.0057989	0.00602678	0.00607957	0.00435012	0.00468182	0.00523607	0.00520441	0.00584255	0.00482226	0.00361313	0.0038124	0.00428339	0.00394023	0.0041797	0.00422636	0.00446884	0.00438026	0.00413365	0.00454399	0.00471533	0.00459108
XMW0411	Cyclohexanol, 2,6-dimethyl-	Alcohol	C8H16O	5337-72-4	-	-	-	-	-	-	-	-	-	-	-	-	-	-	-	-	-	-	-	-	-	-	-	-	-	-	-	-	-	-	-	-	-	-	-	-	-	-
YZMW0517	Tryptamine	Amine	C10H12N2	61-54-1	-	320	8.90901e-05	0.000116157	0.000107874	0.000131693	0.000116443	0.000129841	9.81693e-05	0.000124335	9.30885e-05	0.00010254	9.88651e-05	0.000106635	9.8604e-05	9.57079e-05	0.000116204	0.000131283	0.000104126	0.000101841	0.000118391	0.000148081	0.000178775	0.000121682	0.000139739	0.000164209	0.00012325	0.000116777	0.000107235	0.000156023	0.0001348	0.000110695	0.00010771	9.86075e-05	0.000108045	0.000101148	0.00011594	0.000104063
XMW0732	1-Pentanone, 1-(1H-imidazol-4-yl)-	Heterocyclic compound	C8H12N2O	69393-15-3	-	-	-	-	-	-	-	-	-	-	-	-	-	-	-	-	-	-	-	-	-	-	-	-	-	-	-	-	-	-	-	-	-	-	-	-	-	-
XMW0412	3-Acetyl-2,5-dimethyl furan	Heterocyclic compound	C8H10O2	10599-70-9	sweet, musty, nutty, earthy, cocoa, corn, leathery	-	-	-	-	-	-	-	-	-	-	-	-	-	-	-	-	-	-	-	-	-	-	-	-	-	-	-	-	-	-	-	-	-	-	-	-	-
XMW0728	Benzenemethanol, 4-methyl-.alpha.-(1-methyl-2-propenyl)-, (R*,R*)-	Alcohol	C12H16O	83173-76-6	-	-	-	-	-	-	-	-	-	-	-	-	-	-	-	-	-	-	-	-	-	-	-	-	-	-	-	-	-	-	-	-	-	-	-	-	-	-
XMW0727	Benzaldehyde, 2,5-dimethyl-	Aldehyde	C9H10O	5779-94-2	-	0.2	0.000527307	0.000551542	0.00051252	0.000548758	0.000556487	0.000542971	0.000485488	0.000528303	0.000488698	0.000497251	0.000483724	0.000491216	0.000480244	0.000498395	0.000504941	0.000494513	0.000501212	0.000494828	0.00052413	0.000523556	0.000541249	0.000588357	0.000576625	0.000595692	0.00318745	0.00295163	0.00305903	0.00386264	0.00280701	0.00311513	0.000536278	0.000546283	0.000563408	0.00056348	0.000581767	0.00056223
XMW0417	Cyclohexene, 4-methyl-1-(1-methylethenyl)-	Terpenoids	C10H16	586-67-4	-	-	-	-	-	-	-	-	-	-	-	-	-	-	-	-	-	-	-	-	-	-	-	-	-	-	-	-	-	-	-	-	-	-	-	-	-	-
XMW0418	Decane, 2,4-dimethyl-	Hydrocarbons	C12H26	2801-84-5	-	-	-	-	-	-	-	-	-	-	-	-	-	-	-	-	-	-	-	-	-	-	-	-	-	-	-	-	-	-	-	-	-	-	-	-	-	-
YZMW0349	.alpha.-Hydroxyisocaproic acid	Acid	C6H12O3	498-36-2	-	400	1.75715e-05	1.57734e-05	1.56831e-05	1.51738e-05	1.35162e-05	1.60381e-05	1.26604e-05	1.03864e-05	1.10537e-05	1.21332e-05	1.35859e-05	1.14622e-05	1.39957e-05	1.36927e-05	5.75402e-06	1.24196e-05	1.50498e-05	1.53505e-05	1.54636e-05	1.8953e-06	1.53787e-05	1.59211e-05	4.17482e-07	1.38919e-05	1.99915e-05	1.82619e-05	1.90397e-05	1.87048e-05	2.26769e-05	1.67458e-05	1.6235e-05	2.28532e-05	2.25198e-05	2.44076e-05	2.22234e-05	2.25133e-05
YZMW0512	dl-3-Amino-3-phenylpropionic acid	Acid	C9H11NO2	614-19-7	-	330	7.55073e-05	8.61167e-05	9.68301e-05	0.000120775	0.000110718	0.000130229	7.9805e-05	0.000110804	7.2557e-05	7.89931e-05	9.27524e-05	9.465e-05	0.000101658	9.90031e-05	0.000133681	0.000153344	0.000104193	0.000104261	0.000105783	0.000144741	0.000161669	0.00011596	0.000149624	0.000150246	0.000161474	0.000143413	0.000149184	0.000197627	0.000179827	0.000137377	0.000191572	0.000188181	0.000203805	0.000197131	0.000209413	0.000188336
XMW0423	6,8-Nonadien-2-one, 8-methyl-5-(1-methylethyl)-, (E)-	Ketone	C13H22O	54868-48-3	-	-	-	-	-	-	-	-	-	-	-	-	-	-	-	-	-	-	-	-	-	-	-	-	-	-	-	-	-	-	-	-	-	-	-	-	-	-
XMW0424	2,6-Dimethyl-1-nonen-3-yn-5-ol	Alcohol	C11H18O	19780-98-4	-	-	-	-	-	-	-	-	-	-	-	-	-	-	-	-	-	-	-	-	-	-	-	-	-	-	-	-	-	-	-	-	-	-	-	-	-	-
XMW0425	6-Quinolinamine, 2-methyl-	Heterocyclic compound	C10H10N2	65079-19-8	-	-	-	-	-	-	-	-	-	-	-	-	-	-	-	-	-	-	-	-	-	-	-	-	-	-	-	-	-	-	-	-	-	-	-	-	-	-
XMW0430	2-Piperidinimine	Heterocyclic compound	C5H10N2	22780-54-7	-	-	-	-	-	-	-	-	-	-	-	-	-	-	-	-	-	-	-	-	-	-	-	-	-	-	-	-	-	-	-	-	-	-	-	-	-	-
XMW0434	4-Hexen-1-ol, acetate	Ester	C8H14O2	72237-36-6	-	0.1	0.41977	0.37713	0.327953	0.358579	0.372479	0.337759	0.350972	0.308584	0.318602	0.324951	0.303324	0.328736	0.265982	0.2942	0.256308	0.307388	0.24596	0.300127	0.315208	0.333521	0.447071	0.314498	0.309371	0.347265	0.24042	0.215411	0.209949	0.242321	0.227711	0.228976	0.205214	0.223064	0.199706	0.22055	0.203541	0.214166
YZMW0495	Benzene, 2-methyl-1,3-dinitro-	Nitrogen compounds	C7H6N2O4	606-20-2	-	0.05	1.6464	1.81152	1.62606	1.8558	1.83478	1.81047	2.01976	2.17431	1.93885	1.9963	1.96296	2.07776	3.0217	3.1456	3.2394	3.50206	3.16575	3.22754	4.4572	5.02593	6.57031	4.7545	4.65292	4.96218	6.73312	7.10959	6.33154	7.19657	6.66436	6.72699	7.06526	6.94189	7.20842	7.11753	6.50997	6.78568
XMW0444	1,2,4,5-Tetrazin-3-amine	Amine	C2H3N5	79329-74-1	-	-	-	-	-	-	-	-	-	-	-	-	-	-	-	-	-	-	-	-	-	-	-	-	-	-	-	-	-	-	-	-	-	-	-	-	-	-
XMW0499	Undecane, 3,4-dimethyl-	Hydrocarbons	C13H28	17312-78-6	-	-	-	-	-	-	-	-	-	-	-	-	-	-	-	-	-	-	-	-	-	-	-	-	-	-	-	-	-	-	-	-	-	-	-	-	-	-
XMW0446	2,4-Dimethyl-2-oxazoline-4-methanol	Alcohol	C6H11NO2	39986-37-3	-	-	-	-	-	-	-	-	-	-	-	-	-	-	-	-	-	-	-	-	-	-	-	-	-	-	-	-	-	-	-	-	-	-	-	-	-	-
XMW0721	Benzene, 1-methoxy-4-propyl-	Ether	C10H14O	104-45-0	sweet, anisic, licorice, sassafrass, fennel	-	-	-	-	-	-	-	-	-	-	-	-	-	-	-	-	-	-	-	-	-	-	-	-	-	-	-	-	-	-	-	-	-	-	-	-	-
XMW0448	1,2,4,5-Tetrazine-3,6-diamine	Heterocyclic compound	C2H4N6	19617-90-4	-	-	-	-	-	-	-	-	-	-	-	-	-	-	-	-	-	-	-	-	-	-	-	-	-	-	-	-	-	-	-	-	-	-	-	-	-	-
XMW0450	Ethanone, 1-(2,4-dimethyl-1H-pyrrol-3-yl)-	Ketone	C8H11NO	2386-25-6	-	-	-	-	-	-	-	-	-	-	-	-	-	-	-	-	-	-	-	-	-	-	-	-	-	-	-	-	-	-	-	-	-	-	-	-	-	-
XMW0461	cis-3-Hexenyl cis-3-hexenoate	Ester	C12H20O2	61444-38-0	green, tomato, leafy, pear, melon, metallic, fennel, tropical	-	-	-	-	-	-	-	-	-	-	-	-	-	-	-	-	-	-	-	-	-	-	-	-	-	-	-	-	-	-	-	-	-	-	-	-	-
XMW0722	1-Cyclohexene-1-carboxaldehyde, 5,5-dimethyl-3-oxo-	Aldehyde	C9H12O2	56621-35-3	-	-	-	-	-	-	-	-	-	-	-	-	-	-	-	-	-	-	-	-	-	-	-	-	-	-	-	-	-	-	-	-	-	-	-	-	-	-
XMW0507	1,3-Benzenediol, 5-pentyl-	Phenol	C11H16O2	500-66-3	-	-	-	-	-	-	-	-	-	-	-	-	-	-	-	-	-	-	-	-	-	-	-	-	-	-	-	-	-	-	-	-	-	-	-	-	-	-
YZMW0481	8-Methylnonanoic acid	Acid	C10H20O2	5963-14-4	-	0.66	0.0058888	0.00743186	0.00601296	0.00657996	0.00686073	0.00523526	0.00719464	0.00662573	0.00436764	0.00771198	0.00459004	0.00684692	0.00551347	0.00498994	0.0151236	0.00350678	0.00320121	0.00554077	0.00602268	0.0184378	0.00966371	0.00820851	0.00288548	0.00792088	0.00541703	0.00444109	0.00525381	0.00686232	0.00632991	0.00270463	0.00724133	0.00914389	0.00335942	0.0046238	0.00916141	0.00746122
XMW0664	Benzaldehyde, 2,4-dihydroxy-3,6-dimethyl-	Aldehyde	C9H10O3	34883-14-2	-	-	-	-	-	-	-	-	-	-	-	-	-	-	-	-	-	-	-	-	-	-	-	-	-	-	-	-	-	-	-	-	-	-	-	-	-	-
YZMW0399	Benzoic acid, 3,5-diamino-	Acid	C7H8N2O2	535-87-5	-	7610	4.20517e-06	5.90445e-06	3.843e-06	5.75144e-06	4.13903e-06	4.27383e-06	3.53124e-06	5.75167e-06	4.28535e-06	4.80207e-06	3.80897e-06	3.77611e-06	3.23991e-06	3.2593e-06	4.39484e-06	4.48172e-06	3.5667e-06	3.52485e-06	4.55847e-06	5.09019e-06	6.63141e-06	4.76535e-06	5.21028e-06	6.16066e-06	4.92343e-06	5.73067e-06	5.68933e-06	8.58966e-06	7.30267e-06	4.69492e-06	5.65774e-06	4.63435e-06	5.14668e-06	4.26651e-06	4.37947e-06	5.31865e-06
XMW0611	Decane, 2,3,6-trimethyl-	Hydrocarbons	C13H28	62238-12-4	-	-	-	-	-	-	-	-	-	-	-	-	-	-	-	-	-	-	-	-	-	-	-	-	-	-	-	-	-	-	-	-	-	-	-	-	-	-
XMW0610	Isophthalaldehyde	Aldehyde	C8H6O2	626-19-7	-	-	-	-	-	-	-	-	-	-	-	-	-	-	-	-	-	-	-	-	-	-	-	-	-	-	-	-	-	-	-	-	-	-	-	-	-	-
XMW0659	Benzene, n-butyl-	Aromatics	C10H14	104-51-8	-	0.014	0.515128	0.561354	0.474869	0.427493	0.442306	0.513819	0.367265	0.396571	0.444616	0.399347	0.435168	0.40093	0.414557	0.416956	0.453948	0.422805	0.406867	0.443771	0.407618	0.445148	0.415367	0.579931	0.432828	0.447579	0.360067	0.505763	0.409012	0.3624	0.380392	0.524538	0.513077	0.396706	0.394052	0.39588	0.414015	0.414455
YZMW0398	Trigonelline	Nitrogen compounds	C7H7NO2	535-83-1	-	690	6.81653e-05	7.39305e-05	6.83701e-05	7.28597e-05	7.64044e-05	7.19471e-05	6.95041e-05	7.39813e-05	6.70174e-05	6.96052e-05	6.78419e-05	6.82797e-05	5.93744e-05	6.36482e-05	6.726e-05	7.1535e-05	6.45779e-05	6.70534e-05	6.30605e-05	6.32444e-05	8.38513e-05	6.36321e-05	6.24436e-05	6.2492e-05	3.91475e-05	4.37968e-05	3.95819e-05	4.14764e-05	4.03083e-05	4.23222e-05	4.42789e-05	4.28048e-05	4.18709e-05	4.58597e-05	4.50279e-05	4.34304e-05
XMW0592	Pentadecane, 4-methyl-	Hydrocarbons	C16H34	2801-87-8	-	-	-	-	-	-	-	-	-	-	-	-	-	-	-	-	-	-	-	-	-	-	-	-	-	-	-	-	-	-	-	-	-	-	-	-	-	-
YZMW0432	Parathion	Sulfur compounds	C10H14NO5PS	56-38-2	-	0.04	0.122942	0.128817	0.128309	0.10827	0.132841	0.134735	0.151613	0.131352	0.132749	0.130416	0.136751	0.138789	0.129637	0.152206	0.12442	0.115117	0.143083	0.138334	0.151433	0.128966	0.29013	0.161544	0.160307	0.152296	0.15196	0.200187	0.209152	0.178372	0.176871	0.177355	0.166842	0.17763	0.15776	0.191722	0.197398	0.172457
XMW0585	5-Isoxazolecarboxylic acid, 4,5-dihydro-5-methyl-, methyl ester, (R)-	Heterocyclic compound	C6H9NO3	64018-42-4	-	-	-	-	-	-	-	-	-	-	-	-	-	-	-	-	-	-	-	-	-	-	-	-	-	-	-	-	-	-	-	-	-	-	-	-	-	-
XMW0584	2,5-Dibutoxy-2,5-dihydrofuran	Heterocyclic compound	C12H22O3	20295-23-2	-	-	-	-	-	-	-	-	-	-	-	-	-	-	-	-	-	-	-	-	-	-	-	-	-	-	-	-	-	-	-	-	-	-	-	-	-	-
XMW0578	Furan, 2-butyltetrahydro-	Heterocyclic compound	C8H16O	1004-29-1	-	-	-	-	-	-	-	-	-	-	-	-	-	-	-	-	-	-	-	-	-	-	-	-	-	-	-	-	-	-	-	-	-	-	-	-	-	-
YZMW0439	Cyclopentathiazole	Heterocyclic compound	C6H7NS	5661-10-9	-	0.55	0.125903	0.132005	0.126226	0.130125	0.139871	0.127885	0.12149	0.14149	0.126937	0.12329	0.117281	0.120893	0.0810316	0.0916631	0.0881531	0.0873978	0.0958456	0.0921609	0.0922864	0.0873008	0.0951946	0.105505	0.101572	0.0904987	0.088959	0.1026	0.0992031	0.103864	0.0903133	0.100284	0.150489	0.136541	0.130544	0.158475	0.147539	0.147628
XMW0575	L-Norleucine, methyl ester	Ester	C7H15NO2	21754-55-2	-	-	-	-	-	-	-	-	-	-	-	-	-	-	-	-	-	-	-	-	-	-	-	-	-	-	-	-	-	-	-	-	-	-	-	-	-	-
XMW0573	1,5-Diazabicyclo[3.1.0]hexane	Heterocyclic compound	C4H8N2	13090-31-8	-	-	-	-	-	-	-	-	-	-	-	-	-	-	-	-	-	-	-	-	-	-	-	-	-	-	-	-	-	-	-	-	-	-	-	-	-	-
XMW0391	3,5,11-Eudesmatriene	Terpenoids	C15H22	193615-07-5	-	-	-	-	-	-	-	-	-	-	-	-	-	-	-	-	-	-	-	-	-	-	-	-	-	-	-	-	-	-	-	-	-	-	-	-	-	-
XMW0658	2-Heptenoic acid	Acid	C7H12O2	18999-28-5	green, grassy, fruity, ethereal	-	-	-	-	-	-	-	-	-	-	-	-	-	-	-	-	-	-	-	-	-	-	-	-	-	-	-	-	-	-	-	-	-	-	-	-	-
YZMW0417	n-Butyl cyanoacetate	Ester	C7H11NO2	5459-58-5	-	832	5.73861e-05	5.94317e-05	5.59995e-05	5.49966e-05	5.79748e-05	5.59627e-05	4.44255e-05	5.17479e-05	4.4348e-05	4.4217e-05	4.49333e-05	4.53856e-05	3.96998e-05	4.44956e-05	3.9052e-05	4.01524e-05	4.29701e-05	4.37906e-05	4.0258e-05	3.77067e-05	4.35142e-05	4.47024e-05	4.32057e-05	4.04019e-05	1.83858e-05	2.18077e-05	2.26704e-05	2.07436e-05	2.05926e-05	2.18524e-05	2.28644e-05	2.29255e-05	2.38323e-05	2.44986e-05	2.58718e-05	2.44281e-05
YZMW0414	Cycloheptylamine	Amine	C7H15N	5452-35-7	-	65.8	0.000138419	0.000169453	0.000149384	0.000139572	0.000137868	0.000144277	0.00013562	0.000141145	0.000142684	0.000137898	0.000148316	0.000139197	0.000152005	0.000166774	0.000152629	0.000124834	0.000142661	0.000146086	0.000168199	0.00014327	0.000132264	0.000152311	0.000131007	0.000149622	0.000151211	0.000154673	0.000152015	0.000158288	0.000136138	0.000152167	0.000147312	0.000142697	0.000162049	0.000163752	0.000158825	0.000142333
XMW0644	1H-Imidazole, 2-propyl-	Heterocyclic compound	C6H10N2	50995-95-4	-	-	-	-	-	-	-	-	-	-	-	-	-	-	-	-	-	-	-	-	-	-	-	-	-	-	-	-	-	-	-	-	-	-	-	-	-	-
YZMW0415	Cyclooctanamine	Amine	C8H17N	5452-37-9	-	64	0.000127555	0.000121363	7.69805e-05	0.000178652	0.0001415	6.2646e-05	6.79513e-05	7.4552e-05	7.91384e-05	2.47615e-05	4.74942e-05	1.67077e-05	6.5287e-05	8.70254e-05	0.000172764	0.000153275	0.000108131	0.000113452	0.000116211	6.65642e-05	0.000145321	8.17146e-05	0.000120804	0.000136386	3.34165e-05	0.000145601	7.0396e-05	9.92782e-05	5.93429e-05	7.69776e-05	0.000113869	8.42257e-05	0.000115877	8.9384e-05	0.000121322	6.72548e-05
XMW0641	Heptane, 3,3,4-trimethyl-	Hydrocarbons	C10H22	20278-87-9	-	-	-	-	-	-	-	-	-	-	-	-	-	-	-	-	-	-	-	-	-	-	-	-	-	-	-	-	-	-	-	-	-	-	-	-	-	-
XMW0654	Ethanone, 1-(1,4-dimethyl-3-cyclohexen-1-yl)-	Terpenoids	C10H16O	43219-68-7	fruity	-	-	-	-	-	-	-	-	-	-	-	-	-	-	-	-	-	-	-	-	-	-	-	-	-	-	-	-	-	-	-	-	-	-	-	-	-
XMW0655	2-Butene-1,4-diol, (Z)-	Alcohol	C4H8O2	6117-80-2	-	-	-	-	-	-	-	-	-	-	-	-	-	-	-	-	-	-	-	-	-	-	-	-	-	-	-	-	-	-	-	-	-	-	-	-	-	-
XMW0657	Benzoxazole, 2-methyl-	Heterocyclic compound	C8H7NO	95-21-6	tobacco, burnt, phenol, meaty, powdery, capers	-	-	-	-	-	-	-	-	-	-	-	-	-	-	-	-	-	-	-	-	-	-	-	-	-	-	-	-	-	-	-	-	-	-	-	-	-
XMW0617	Propanoic acid, 2-methyl-, 3-hydroxy-2,2,4-trimethylpentyl ester	Ester	C12H24O3	77-68-9	-	-	-	-	-	-	-	-	-	-	-	-	-	-	-	-	-	-	-	-	-	-	-	-	-	-	-	-	-	-	-	-	-	-	-	-	-	-
XMW0640	Panaxene	Terpenoids	C15H24	871660-95-6	-	-	-	-	-	-	-	-	-	-	-	-	-	-	-	-	-	-	-	-	-	-	-	-	-	-	-	-	-	-	-	-	-	-	-	-	-	-
XMW0639	1,4-Methanobenzocyclodecene, 1,2,3,4,4a,5,8,9,12,12a-decahydro-	Terpenoids	C15H22	74708-73-9	-	-	-	-	-	-	-	-	-	-	-	-	-	-	-	-	-	-	-	-	-	-	-	-	-	-	-	-	-	-	-	-	-	-	-	-	-	-
XMW0636	Decane, 1-iodo-	Halogenated hydrocarbons	C10H21I	2050-77-3	-	-	-	-	-	-	-	-	-	-	-	-	-	-	-	-	-	-	-	-	-	-	-	-	-	-	-	-	-	-	-	-	-	-	-	-	-	-
XMW0627	Diethyl Phthalate	Ester	C12H14O4	84-66-2	bitter	0.33	0.0582732	0.0600653	0.0551258	0.0666562	0.0613339	0.0652573	0.0477142	0.052958	0.0486168	0.045167	0.0459057	0.0481799	0.173716	0.176251	0.209695	0.237579	0.189216	0.178644	0.0629535	0.0885551	0.0901344	0.0667886	0.0704666	0.074901	0.0335395	0.0341758	0.0337158	0.0548338	0.0414221	0.0350239	0.116154	0.111359	0.0967807	0.105717	0.134034	0.109522
YZMW0413	2-Methyl-5-nitrophenol	Phenol	C7H7NO3	5428-54-6	-	0.3	0.154549	0.173215	0.153487	0.179352	0.173603	0.182115	0.128093	0.149819	0.121734	0.132707	0.13322	0.133714	0.146244	0.147503	0.165559	0.174205	0.152402	0.148678	0.153806	0.18012	0.243326	0.169964	0.174327	0.18966	0.141319	0.149603	0.14481	0.166692	0.156448	0.143406	0.87916	0.869141	0.932865	0.871907	0.906423	0.878
XMW0622	Butanedioic acid, bis(2-methylpropyl) ester	Ester	C12H22O4	925-06-4	-	-	-	-	-	-	-	-	-	-	-	-	-	-	-	-	-	-	-	-	-	-	-	-	-	-	-	-	-	-	-	-	-	-	-	-	-	-
XMW0555	2-Acetylbenzofuran	Heterocyclic compound	C10H8O2	1646-26-0	sweet, coumarin, floral, orange, flowery, tropical, neroli, lactonic, honeysuckle, honey	-	-	-	-	-	-	-	-	-	-	-	-	-	-	-	-	-	-	-	-	-	-	-	-	-	-	-	-	-	-	-	-	-	-	-	-	-
XMW0665	Muurola-4,10(14)-dien-1.beta.-ol	Terpenoids	C15H24O	257293-90-6	-	-	-	-	-	-	-	-	-	-	-	-	-	-	-	-	-	-	-	-	-	-	-	-	-	-	-	-	-	-	-	-	-	-	-	-	-	-
XMW0704	Dispiro[1,3-dioxolane-2,2'-bicyclo[2.2.1]heptane-3',2''-(1'',3''-dioxolane)], 4',7',7'-trimethyl-	Heterocyclic compound	C14H22O4	24022-14-8	-	-	-	-	-	-	-	-	-	-	-	-	-	-	-	-	-	-	-	-	-	-	-	-	-	-	-	-	-	-	-	-	-	-	-	-	-	-
XMW0553	2-Acetoxyacetophenone	Ketone	C10H10O3	7250-94-4	-	-	-	-	-	-	-	-	-	-	-	-	-	-	-	-	-	-	-	-	-	-	-	-	-	-	-	-	-	-	-	-	-	-	-	-	-	-
XMW0518	Tricyclo[2.2.1.0(2,6)]heptane, 1,3,3-trimethyl-	Terpenoids	C10H16	488-97-1	-	-	-	-	-	-	-	-	-	-	-	-	-	-	-	-	-	-	-	-	-	-	-	-	-	-	-	-	-	-	-	-	-	-	-	-	-	-
XMW0678	1,3-Cyclohexadiene, 1,5,5,6-tetramethyl-	Terpenoids	C10H16	514-94-3	-	-	-	-	-	-	-	-	-	-	-	-	-	-	-	-	-	-	-	-	-	-	-	-	-	-	-	-	-	-	-	-	-	-	-	-	-	-
XMW0682	Benzenemethanol, .alpha.-methyl-.alpha.-(1-methyl-2-propenyl)-	Alcohol	C12H16O	61967-11-1	-	-	-	-	-	-	-	-	-	-	-	-	-	-	-	-	-	-	-	-	-	-	-	-	-	-	-	-	-	-	-	-	-	-	-	-	-	-
XMW0685	(2S,6R,7S,8E)-(+)-2,7-Epoxy-4,8-megastigmadiene	Heterocyclic compound	C13H20O	108342-25-2	-	-	-	-	-	-	-	-	-	-	-	-	-	-	-	-	-	-	-	-	-	-	-	-	-	-	-	-	-	-	-	-	-	-	-	-	-	-
YZMW0465	Acetamide, N-(aminothioxomethyl)-	Amine	C3H6N2OS	591-08-2	-	11	0.00535845	0.00679545	0.00595217	0.00708718	0.00485268	0.00663523	0.003277	0.00750371	0.00427209	0.00460526	0.00367065	0.00669814	0.00540325	0.00433339	0.00552465	0.00498476	0.00517215	0.00574613	0.00662304	0.00623824	0.00579701	0.00625566	0.00463889	0.00605798	0.00366403	0.00469431	0.00603173	0.00556285	0.00599164	0.00494774	0.00627246	0.0078774	0.00875701	0.00851766	0.00887327	0.00907673
XMW0511	3,7,11,15-Tetramethyl-2-hexadecen-1-ol	Alcohol	C20H40O	102608-53-7	-	-	-	-	-	-	-	-	-	-	-	-	-	-	-	-	-	-	-	-	-	-	-	-	-	-	-	-	-	-	-	-	-	-	-	-	-	-
YZMW0394	Phenol, 2-methyl, 4,6-dinitro-	Phenol	C7H6N2O5	534-52-1	-	1.3	0.00187395	0.00203695	0.00185031	0.0032852	0.00273162	0.0029766	0.00260209	0.00288532	0.00237465	0.00203416	0.00311294	0.0024649	0.00233729	0.00199034	0.002178	0.00222856	0.00227985	0.00245825	0.00323747	0.00355799	0.00514672	0.00326204	0.00327331	0.00372842	0.00305917	0.003169	0.00312298	0.00277756	0.00294443	0.00224323	0.00240778	0.00225876	0.00241137	0.00304655	0.00259312	0.00252705
YZMW0387	3,5-Dimethoxy-4-hydroxycinnamic acid	Acid	C11H12O5	530-59-6	-	100	7.25976e-05	7.37821e-05	6.80408e-05	7.00025e-05	7.80197e-05	7.64889e-05	8.88657e-05	9.08848e-05	7.46645e-05	7.43032e-05	6.02219e-05	6.32454e-05	6.11773e-05	7.86826e-05	7.02033e-05	6.25016e-05	6.00884e-05	7.0721e-05	8.58191e-05	7.36339e-05	0.00010199	8.81889e-05	8.97915e-05	9.7645e-05	0.000123468	8.59918e-05	9.20147e-05	0.000132577	0.000127567	0.000100039	8.17857e-05	9.52819e-05	6.16468e-05	8.97903e-05	8.47605e-05	7.43046e-05
XMW0510	2-Hexadecanol	Alcohol	C16H34O	14852-31-4	-	-	-	-	-	-	-	-	-	-	-	-	-	-	-	-	-	-	-	-	-	-	-	-	-	-	-	-	-	-	-	-	-	-	-	-	-	-
XMW0701	1H-Pyrrolo[2,3-b]pyridine, 2-(1-methylethyl)-	Heterocyclic compound	C10H12N2	27257-18-7	-	-	-	-	-	-	-	-	-	-	-	-	-	-	-	-	-	-	-	-	-	-	-	-	-	-	-	-	-	-	-	-	-	-	-	-	-	-
XMW0702	2-(3-Thienyl)pyridine	Heterocyclic compound	C9H7NS	21298-55-5	-	-	-	-	-	-	-	-	-	-	-	-	-	-	-	-	-	-	-	-	-	-	-	-	-	-	-	-	-	-	-	-	-	-	-	-	-	-
XMW0505	Biuret, 1-[(dimethylamino)methylene]-	Amine	C5H10N4O2	10264-58-1	-	-	-	-	-	-	-	-	-	-	-	-	-	-	-	-	-	-	-	-	-	-	-	-	-	-	-	-	-	-	-	-	-	-	-	-	-	-
XMW0703	Hexanoic acid, octyl ester	Ester	C14H28O2	4887-30-3	-	5	0.000409394	0.000371868	0.000473005	0.000447977	0.000488265	0.000558181	0.000325269	0.000475655	0.000435424	0.000384875	0.000295369	0.000393339	0.000526814	0.000512943	0.000488418	0.000590814	0.000486655	0.000491867	0.000710322	0.00068571	0.000898958	0.000600425	0.000682655	0.000624354	0.00100099	0.00107129	0.000961604	0.00119309	0.00102073	0.00104861	0.00150039	0.00151974	0.001516	0.00152391	0.00164098	0.00136589
YZMW0472	3-Thien-2-ylpropanoic acid	Acid	C7H8O2S	5928-51-8	-	13.2	0.00340713	0.00351366	0.00321725	0.00347982	0.00357704	0.00340455	0.00313924	0.00311346	0.00296249	0.00321098	0.00293937	0.00317013	0.00277491	0.00297783	0.00291144	0.00327838	0.00294167	0.00308859	0.00255125	0.00288367	0.00366041	0.00286096	0.00279753	0.00291628	0.00164649	0.00196613	0.00172563	0.00190911	0.0018126	0.00185764	0.00166265	0.00169919	0.00182365	0.00183846	0.001813	0.00181965
XMW0519	Cyclobutanespiro-2'-bicyclo[1.1.0]butane-4'-spirocyclobutane	Hydrocarbons	C10H14	76308-11-7	-	-	-	-	-	-	-	-	-	-	-	-	-	-	-	-	-	-	-	-	-	-	-	-	-	-	-	-	-	-	-	-	-	-	-	-	-	-
XMW0520	Nitroguanidine	Amine	CH4N4O2	556-88-7	-	-	-	-	-	-	-	-	-	-	-	-	-	-	-	-	-	-	-	-	-	-	-	-	-	-	-	-	-	-	-	-	-	-	-	-	-	-
XMW0521	1,7-Octadiene, 2-methyl-6-methylene-	Terpenoids	C10H16	1686-30-2	-	-	-	-	-	-	-	-	-	-	-	-	-	-	-	-	-	-	-	-	-	-	-	-	-	-	-	-	-	-	-	-	-	-	-	-	-	-
XMW0539	3,4-Dimethoxytoluene	Ether	C9H12O2	494-99-5	-	-	-	-	-	-	-	-	-	-	-	-	-	-	-	-	-	-	-	-	-	-	-	-	-	-	-	-	-	-	-	-	-	-	-	-	-	-
XMW0552	2,2'-Isopropylidenebis(5-methylfuran)	Heterocyclic compound	C13H16O2	59212-75-8	-	-	-	-	-	-	-	-	-	-	-	-	-	-	-	-	-	-	-	-	-	-	-	-	-	-	-	-	-	-	-	-	-	-	-	-	-	-
XMW0550	N-Cyanomethyl-2-cyanimino-pyrrolidine	Heterocyclic compound	C7H8N4	134881-46-2	-	-	-	-	-	-	-	-	-	-	-	-	-	-	-	-	-	-	-	-	-	-	-	-	-	-	-	-	-	-	-	-	-	-	-	-	-	-
XMW0546	(5R,8aR)-5-Propyloctahydroindolizine	Heterocyclic compound	C11H21N	120057-35-4	-	-	-	-	-	-	-	-	-	-	-	-	-	-	-	-	-	-	-	-	-	-	-	-	-	-	-	-	-	-	-	-	-	-	-	-	-	-
XMW0544	Azulene, 1,2,3,3a,4,5,6,7-octahydro-1,4-dimethyl-7-(1-methylethenyl)-, [1R-(1.alpha.,3a.beta.,4.alpha.,7.beta.)]-	Terpenoids	C15H24	22567-17-5	musty	-	-	-	-	-	-	-	-	-	-	-	-	-	-	-	-	-	-	-	-	-	-	-	-	-	-	-	-	-	-	-	-	-	-	-	-	-
XMW0542	1-Cyclohexene-1-carboxaldehyde, 4-(1-methylethyl)-	Terpenoids	C10H16O	21391-98-0	-	-	-	-	-	-	-	-	-	-	-	-	-	-	-	-	-	-	-	-	-	-	-	-	-	-	-	-	-	-	-	-	-	-	-	-	-	-
XMW0670	Acetonitrile, 2,2'-iminobis-	Nitrogen compounds	C4H5N3	628-87-5	-	-	-	-	-	-	-	-	-	-	-	-	-	-	-	-	-	-	-	-	-	-	-	-	-	-	-	-	-	-	-	-	-	-	-	-	-	-
XMW0522	Pyridine, 3-propyl-	Heterocyclic compound	C8H11N	4673-31-8	sweet, musty, beany, earthy, woody	-	-	-	-	-	-	-	-	-	-	-	-	-	-	-	-	-	-	-	-	-	-	-	-	-	-	-	-	-	-	-	-	-	-	-	-	-
XMW0672	1,2,4-Triazine-3,5(2H,4H)-dione	Ketone	C3H3N3O2	461-89-2	-	-	-	-	-	-	-	-	-	-	-	-	-	-	-	-	-	-	-	-	-	-	-	-	-	-	-	-	-	-	-	-	-	-	-	-	-	-
YZMW0453	Barbital	Ketone	C8H12N2O3	57-44-3	-	180	0.00015893	0.000171842	0.000160084	0.000177514	0.000171773	0.000178198	0.000203006	0.000212549	0.000187913	0.000200067	0.000185265	0.000206159	0.00020655	0.000200958	0.000208877	0.000239598	0.000216134	0.000199209	0.00028111	0.000330082	0.000531469	0.000319596	0.000319028	0.000335402	0.000102474	0.000113777	0.000108562	0.000120226	0.000112772	0.000112405	0.000153218	0.000144543	0.000156981	0.000153165	0.000134392	0.000151702
XMW0529	Bicyclo[2.2.1]heptane, 2-chloro-1,7,7-trimethyl-, (1R-endo)-	Terpenoids	C10H17Cl	30462-53-4	-	-	-	-	-	-	-	-	-	-	-	-	-	-	-	-	-	-	-	-	-	-	-	-	-	-	-	-	-	-	-	-	-	-	-	-	-	-
YZMW0456	Hydrazinecarboxamide	Amine	CH5N3O	57-56-7	-	7500	7.48019e-06	7.75778e-06	5.98205e-06	2.43327e-06	5.98142e-06	5.777e-06	7.45248e-06	6.64446e-06	8.36903e-06	7.862e-06	8.37155e-06	6.39861e-06	5.35398e-06	5.84026e-06	3.13149e-06	2.97209e-06	2.20626e-06	4.26462e-06	5.08182e-06	4.09727e-06	3.99291e-06	5.75952e-06	2.13709e-06	3.56843e-06	5.22753e-06	6.34023e-06	5.28953e-06	5.12072e-06	5.15271e-06	6.13208e-06	5.7146e-06	5.61352e-06	4.46755e-06	5.35237e-06	5.76243e-06	5.20671e-06
XMW0526	Acetaldehyde, (3,3-dimethylcyclohexylidene)-, (Z)-	Aldehyde	C10H16O	26532-24-1	-	-	-	-	-	-	-	-	-	-	-	-	-	-	-	-	-	-	-	-	-	-	-	-	-	-	-	-	-	-	-	-	-	-	-	-	-	-
YZMW0458	Phenol, 4-(ethoxymethyl)-	Phenol	C9H12O2	57726-26-8	-	0.1	0.0311698	0.0350521	0.0336359	0.0340303	0.0359852	0.0367928	0.0847059	0.0775353	0.0832825	0.0853828	0.0779014	0.0821573	0.135816	0.160401	0.158681	0.173561	0.15805	0.175602	0.355611	0.406632	0.492233	0.355895	0.35853	0.386921	0.551436	0.562705	0.512038	0.588834	0.528758	0.554284	0.469444	0.457228	0.531745	0.536041	0.469943	0.4953
XMW0392	.alpha.-Corocalene	Terpenoids	C15H20	20129-39-9	-	-	-	-	-	-	-	-	-	-	-	-	-	-	-	-	-	-	-	-	-	-	-	-	-	-	-	-	-	-	-	-	-	-	-	-	-	-
XMW0283	1-(Furan-2-yl)-2-methylpentan-1-one	Ketone	C10H14O2	1248070-62-3	-	-	-	-	-	-	-	-	-	-	-	-	-	-	-	-	-	-	-	-	-	-	-	-	-	-	-	-	-	-	-	-	-	-	-	-	-	-
XMW0390	2,2,4-Trimethyl-1,3-pentanediol diisobutyrate	Ester	C16H30O4	6846-50-0	-	0.014	2.59459	3.47947	3.05912	3.83577	3.53408	3.9126	2.71196	3.32417	2.5189	2.78222	2.86843	2.98108	2.73746	2.61659	3.73068	3.94272	3.10968	2.95669	3.48221	4.58679	6.19787	3.79776	4.91699	4.46332	3.9853	4.27981	3.92149	4.9322	4.58298	4.07122	4.19743	4.13774	4.29855	4.09666	4.43175	4.20428
YZMW0764	Benzenamine, 2-methyl-5-nitro-	Amine	C7H8N2O2	99-55-8	-	30	0.00408561	0.00500125	0.0047031	0.00583184	0.00521109	0.00575442	0.00414838	0.00517619	0.00408742	0.00432534	0.00426643	0.00469062	0.00432212	0.00428086	0.00525022	0.0056864	0.0045718	0.00439604	0.00407626	0.00536904	0.00638183	0.0042368	0.00477488	0.00512801	0.00226561	0.00218742	0.00225427	0.00280255	0.00244495	0.00225593	0.00221734	0.00212334	0.00227908	0.00218657	0.00232119	0.0022147
YZMW0738	Benzenamine, 3,4-dichloro-	Amine	C6H5Cl2N	95-76-1	-	0.003	0.738698	0.772649	0.717983	0.768748	0.779576	0.760641	0.680114	0.740093	0.684611	0.696593	0.677642	0.688137	3.4056	3.50182	4.366	4.30683	3.51071	3.98214	9.93001	11.6726	16.3019	10.3961	10.1816	11.6716	15.0678	15.3265	14.5887	15.6282	14.9923	14.4489	14.8061	14.1732	14.747	14.8049	13.2977	13.8659
XMW0138	Azulene, 1,4-dimethyl-7-(1-methylethyl)-	Terpenoids	C15H18	489-84-9	-	-	-	-	-	-	-	-	-	-	-	-	-	-	-	-	-	-	-	-	-	-	-	-	-	-	-	-	-	-	-	-	-	-	-	-	-	-
YZMW0756	4-tert-Butyl-2-chlorophenol	Phenol	C10H13ClO	98-28-2	-	0.3	2.86463	2.90263	2.93702	3.51456	3.16892	3.17452	2.62243	3.01051	2.49959	2.52479	2.36127	2.55726	2.29991	2.14236	2.73934	2.74449	2.54084	2.47017	2.88925	3.72329	2.78008	3.05219	3.12548	3.31697	2.48095	2.4827	2.36766	2.71503	2.33519	2.5342	2.89557	2.84487	2.95493	2.95924	3.20177	3.11986
YZMW0757	p-tert.-Butylcatechol	Phenol	C10H14O2	98-29-3	-	1	0.860818	0.962239	0.84928	1.02605	0.97168	0.989994	0.85233	0.923985	0.840505	0.861739	0.856163	0.871994	0.781584	0.785325	0.827739	0.921947	0.816095	0.788826	0.87478	1.0257	1.31977	0.927197	0.959905	0.997901	0.867546	0.967962	0.898534	0.991246	0.937242	0.958402	0.937956	0.93428	0.997551	0.975102	0.98092	0.964196
YZMW0758	m-Nitroaniline	Amine	C6H6N2O2	99-09-2	-	250	0.000653408	0.000773315	0.000732678	0.000877651	0.000830399	0.0008216	0.000615679	0.00073869	0.000548695	0.00058856	0.000557429	0.000632517	0.000601411	0.000501766	0.000730859	0.000710485	0.000691614	0.000679536	0.000662756	0.000871894	0.000799953	0.000666745	0.000721681	0.000728565	0.000533097	0.000599319	0.000581368	0.000626946	0.000578668	0.000617696	0.000726009	0.000660176	0.00075547	0.000736136	0.000702044	0.00071525
YZMW0759	Benzoic acid, 3,5-dihydroxy-	Acid	C7H6O4	99-10-5	-	90	5.59742e-06	8.54575e-06	7.28052e-06	9.53873e-06	9.52942e-06	9.27214e-06	1.0307e-06	1.1216e-06	1.03752e-06	1.05568e-06	1.02696e-06	1.04286e-06	1.01957e-06	1.0581e-06	1.072e-06	1.04986e-06	1.06409e-06	1.05053e-06	1.11274e-06	1.11152e-06	1.14908e-06	1.24909e-06	1.22419e-06	1.26467e-06	1.12023e-06	1.23174e-06	1.16758e-06	1.24664e-06	1.19187e-06	1.23887e-06	1.37108e-05	1.35372e-05	1.38824e-05	1.45536e-05	1.37525e-05	1.3471e-05
YZMW0761	Benzoic acid, 3,4,5-trihydroxy-, methyl ester	Ester	C8H8O5	99-24-1	-	0.232	0.659231	0.77005	0.690029	0.773773	0.760108	0.733783	0.677984	0.787091	0.647854	0.677263	0.655922	0.658302	0.63163	0.640121	0.706255	0.773821	0.660897	0.672099	0.679151	0.717637	0.855183	0.729452	0.720941	0.808038	0.624143	0.54658	0.512725	0.677278	0.645107	0.55413	0.588796	0.539935	0.549899	0.543038	0.581988	0.545282
XMW0133	6-Methyl-6-(5-methylfuran-2-yl)heptan-2-one	Ketone	C13H20O2	50464-95-4	-	-	-	-	-	-	-	-	-	-	-	-	-	-	-	-	-	-	-	-	-	-	-	-	-	-	-	-	-	-	-	-	-	-	-	-	-	-
XMW0130	Heptanoic acid, octyl ester	Ester	C15H30O2	5132-75-2	fruity, fatty	-	-	-	-	-	-	-	-	-	-	-	-	-	-	-	-	-	-	-	-	-	-	-	-	-	-	-	-	-	-	-	-	-	-	-	-	-
YZMW0734	1,2-Benzenediamine	Amine	C6H8N2	95-54-5	-	4320	6.35276e-06	6.59877e-06	5.32966e-06	5.27326e-06	5.14245e-06	5.40611e-06	5.75614e-06	5.6257e-06	6.10657e-06	5.8821e-06	5.79778e-06	5.29955e-06	3.90116e-06	4.66597e-06	3.20431e-06	3.0016e-06	3.81329e-06	4.14305e-06	5.16605e-06	4.6028e-06	5.26611e-06	5.24198e-06	4.20693e-06	4.51773e-06	3.19462e-06	3.21753e-06	3.48394e-06	3.64575e-06	3.35215e-06	3.45061e-06	3.28692e-06	3.65911e-06	3.01271e-06	3.56374e-06	4.29421e-06	4.0814e-06
w01	Cyclooctyl alcohol	Alcohol	C8H16O	696-71-9	-	10	0.00190158	0.00233873	0.00222066	0.00202118	0.0021357	0.00229562	0.00166821	0.00214437	0.00189179	0.00177391	0.00188056	0.00188124	0.00210508	0.0025786	0.00240089	0.00188976	0.00221017	0.00200449	0.0019106	0.00200648	0.00150668	0.00194067	0.00179753	0.00200768	0.00200898	0.00213876	0.00197276	0.00170725	0.00202081	0.00198984	0.00176827	0.00181873	0.0020831	0.00177525	0.00165767	0.00172284
w04	4,8,12-Tetradecatrienal, 5,9,13-trimethyl-	Aldehyde	C17H28O	66408-55-7	-	-	-	-	-	-	-	-	-	-	-	-	-	-	-	-	-	-	-	-	-	-	-	-	-	-	-	-	-	-	-	-	-	-	-	-	-	-
w07	1H-Indene, 1-ethylidene-	Hydrocarbons	C11H10	2471-83-2	-	-	-	-	-	-	-	-	-	-	-	-	-	-	-	-	-	-	-	-	-	-	-	-	-	-	-	-	-	-	-	-	-	-	-	-	-	-
XMW0128	2-Butyl-5-propylthiazole	Heterocyclic compound	C10H17NS	52414-86-5	-	-	-	-	-	-	-	-	-	-	-	-	-	-	-	-	-	-	-	-	-	-	-	-	-	-	-	-	-	-	-	-	-	-	-	-	-	-
w10	2-Undecanone, 6,10-dimethyl-	Ketone	C13H26O	1604-34-8	dry, musty	-	-	-	-	-	-	-	-	-	-	-	-	-	-	-	-	-	-	-	-	-	-	-	-	-	-	-	-	-	-	-	-	-	-	-	-	-
XMW0121	1-Nonene, 4,6,8-trimethyl-	Hydrocarbons	C12H24	54410-98-9	-	-	-	-	-	-	-	-	-	-	-	-	-	-	-	-	-	-	-	-	-	-	-	-	-	-	-	-	-	-	-	-	-	-	-	-	-	-
w11	3,5,9-Undecatrien-2-one, 6,10-dimethyl-, (E,Z)-	Ketone	C13H20O	13927-47-4	-	-	-	-	-	-	-	-	-	-	-	-	-	-	-	-	-	-	-	-	-	-	-	-	-	-	-	-	-	-	-	-	-	-	-	-	-	-
XMW0119	Cyclopentanone, 2-methyl-3-(1-methylethyl)-	Ketone	C9H16O	54549-81-4	-	-	-	-	-	-	-	-	-	-	-	-	-	-	-	-	-	-	-	-	-	-	-	-	-	-	-	-	-	-	-	-	-	-	-	-	-	-
XMW0139	6-Isopropyl-1,4-dimethylnaphthalene	Aromatics	C15H18	489-77-0	-	-	-	-	-	-	-	-	-	-	-	-	-	-	-	-	-	-	-	-	-	-	-	-	-	-	-	-	-	-	-	-	-	-	-	-	-	-
YZMW0731	Azacyclotridecan-2-one	Ketone	C12H23NO	947-04-6	-	3950	5.01699e-07	5.49033e-07	3.09237e-07	9.49928e-07	8.28534e-07	7.85824e-07	5.85853e-08	6.37519e-08	5.89727e-08	6.00048e-08	5.83724e-08	5.92765e-08	7.66806e-07	1.00981e-06	1.10228e-06	1.53188e-06	5.98487e-07	7.97189e-07	8.846e-07	1.13218e-06	2.03173e-06	1.13205e-06	1.29044e-06	1.5181e-06	1.43199e-06	1.16606e-06	1.4427e-06	1.78808e-06	1.47823e-06	1.42744e-06	1.40279e-06	1.12336e-06	1.23474e-06	1.23537e-06	1.35957e-06	1.72381e-06
XMW0118	1-Naphthalenol, 5,6,7,8-tetrahydro-2,5-dimethyl-8-(1-methylethyl)-	Terpenoids	C15H22O	55012-72-1	-	-	-	-	-	-	-	-	-	-	-	-	-	-	-	-	-	-	-	-	-	-	-	-	-	-	-	-	-	-	-	-	-	-	-	-	-	-
XMW0147	1-Methyl-4-(6-methylhept-5-en-2-yl)cyclohexa-1,3-diene	Terpenoids	C15H24	451-55-8	-	-	-	-	-	-	-	-	-	-	-	-	-	-	-	-	-	-	-	-	-	-	-	-	-	-	-	-	-	-	-	-	-	-	-	-	-	-
XMW0164	1-Oxaspiro[4.5]dec-6-ene, 2,6,10,10-tetramethyl-	Terpenoids	C13H22O	36431-72-8	tea, herbal, green, wet, tobacco, leafy, metallic, woody, spicy	-	-	-	-	-	-	-	-	-	-	-	-	-	-	-	-	-	-	-	-	-	-	-	-	-	-	-	-	-	-	-	-	-	-	-	-	-
XMW0163	Furan, 2-hexyl-	Heterocyclic compound	C10H16O	3777-70-6	-	-	-	-	-	-	-	-	-	-	-	-	-	-	-	-	-	-	-	-	-	-	-	-	-	-	-	-	-	-	-	-	-	-	-	-	-	-
XMW0160	Megastigmatrienone	Ketone	C13H18O	38818-55-2	-	-	-	-	-	-	-	-	-	-	-	-	-	-	-	-	-	-	-	-	-	-	-	-	-	-	-	-	-	-	-	-	-	-	-	-	-	-
XMW0159	2,6,10-Trimethyltridecane	Terpenoids	C16H34	3891-99-4	-	-	-	-	-	-	-	-	-	-	-	-	-	-	-	-	-	-	-	-	-	-	-	-	-	-	-	-	-	-	-	-	-	-	-	-	-	-
XMW0158	Pentadecane, 2,6,10-trimethyl-	Terpenoids	C18H38	3892-00-0	-	-	-	-	-	-	-	-	-	-	-	-	-	-	-	-	-	-	-	-	-	-	-	-	-	-	-	-	-	-	-	-	-	-	-	-	-	-
YZMW0685	4,5-(Decamethylene)thiazole	Heterocyclic compound	C13H21NS	84648-04-4	-	0.7	0.0156066	0.0205957	0.0127816	0.0173931	0.0170521	0.0139214	0.0141277	0.0171468	0.0131314	0.0163845	0.0155935	0.014306	0.0114314	0.0165077	0.0140902	0.0162312	0.0164985	0.0134663	0.0161082	0.0194545	0.0203464	0.0203979	0.0188483	0.0179662	0.0138039	0.0206216	0.0204297	0.0163209	0.0168542	0.015587	0.015318	0.0172155	0.0180472	0.0209331	0.0189921	0.0157991
XMW0156	Spiro[4.5]decan-7-one, 1,8-dimethyl-4-(1-methylethyl)-	Ketone	C15H26O	39510-26-4	-	-	-	-	-	-	-	-	-	-	-	-	-	-	-	-	-	-	-	-	-	-	-	-	-	-	-	-	-	-	-	-	-	-	-	-	-	-
XMW0148	1H-Tetrazol-5-amine	Amine	CH3N5	4418-61-5	-	-	-	-	-	-	-	-	-	-	-	-	-	-	-	-	-	-	-	-	-	-	-	-	-	-	-	-	-	-	-	-	-	-	-	-	-	-
XMW0146	(3S,3aR)-3-Butyl-3a,4,5,6-tetrahydroisobenzofuran-1(3H)-one	Ester	C12H18O2	4567-33-3	-	-	-	-	-	-	-	-	-	-	-	-	-	-	-	-	-	-	-	-	-	-	-	-	-	-	-	-	-	-	-	-	-	-	-	-	-	-
YZMW0729	4-Chloro-3-nitrobenzonitrile	Halogenated hydrocarbons	C7H3ClN2O2	939-80-0	-	133	0.000822624	0.000919253	0.000826027	0.000869603	0.000897441	0.00089256	0.000772435	0.0007615	0.000722319	0.000749949	0.000746176	0.000780057	0.000761627	0.000730698	0.000730866	0.000744467	0.000770679	0.00071736	0.000814148	0.000869821	0.00118824	0.000828908	0.000813292	0.000896078	0.000603149	0.000639609	0.000610869	0.000653616	0.000624426	0.000612674	0.000573865	0.000557011	0.000588281	0.000569008	0.000635268	0.000593898
YZMW0699	Benzenesulfonamide, 2-methyl-	Amine	C7H9NO2S	88-19-7	-	30	0.000604656	0.00112289	0.000713722	0.00134702	0.0010392	0.00168218	0.0006576	0.00134254	0.000522033	0.000685365	0.000635627	0.000927271	0.00111035	0.000640207	0.00123747	0.00111084	0.000855752	0.000983144	0.000905687	0.00200742	0.00099698	0.000943795	0.00147794	0.00132141	0.00169338	0.00141021	0.0015078	0.00225973	0.00183567	0.0014134	0.00235795	0.00213665	0.0022738	0.00207895	0.00226665	0.0020878
YZMW0705	Phenol, 4-chloro-5-methyl-2-(1-methylethyl)-	Phenol	C10H13ClO	89-68-9	-	0.6	0.0295456	0.0303433	0.0258924	0.0302506	0.0288358	0.0278624	0.0661171	0.066647	0.0601166	0.0633341	0.0600922	0.0672661	0.116847	0.12084	0.124859	0.139283	0.119936	0.128357	0.199733	0.220969	0.311232	0.210713	0.207486	0.224214	0.498645	0.524698	0.489608	0.545534	0.514215	0.515308	0.613115	0.592362	0.607502	0.599677	0.573646	0.58323
YZMW0706	Naphthalene, 1-bromo-	Halogenated hydrocarbons	C10H7Br	90-11-9	-	0.25	0.213687	0.266292	0.253492	0.244419	0.26672	0.25179	0.247355	0.251145	0.226409	0.240608	0.239155	0.24209	0.227959	0.237443	0.234696	0.233158	0.223132	0.237632	0.287581	0.289555	0.407115	0.290354	0.282374	0.296013	0.226762	0.257637	0.241357	0.244327	0.244802	0.260349	0.283112	0.28849	0.30356	0.306683	0.293734	0.298961
XMW0142	3a,7-Methano-3aH-cyclopentacyclooctene, 1,4,5,6,7,8,9,9a-octahydro-1,1,7-trimethyl-, [3aR-(3a.alpha.,7.alpha.,9a.beta.)]-	Terpenoids	C15H24	469-92-1	-	-	-	-	-	-	-	-	-	-	-	-	-	-	-	-	-	-	-	-	-	-	-	-	-	-	-	-	-	-	-	-	-	-	-	-	-	-
XMW0140	Naphthalene, 1,6-dimethyl-4-(1-methylethyl)-	Terpenoids	C15H18	483-78-3	-	-	-	-	-	-	-	-	-	-	-	-	-	-	-	-	-	-	-	-	-	-	-	-	-	-	-	-	-	-	-	-	-	-	-	-	-	-
YZMW0711	Naphthalene, decahydro-	Aromatics	C10H18	91-17-8	-	0.1	0.567344	0.659507	0.643031	0.637407	0.655273	0.634808	0.567849	0.62529	0.559589	0.60109	0.572622	0.592793	0.612313	0.600199	0.639625	0.630463	0.64115	0.663986	0.595559	0.622232	0.704464	0.655149	0.64246	0.647223	0.517291	0.623091	0.550395	0.579462	0.544688	0.582167	0.588374	0.529562	0.551069	0.611054	0.595951	0.584912
YZMW0712	Benzoic acid, 2,4-dimethoxy-	Acid	C9H10O4	91-52-1	-	30	0.000115929	0.000740113	0.00019574	0.000759751	0.000750616	0.000244152	0.000293784	0.000316608	0.000819916	0.000268702	0.000846278	0.000380151	0.00038722	0.000388024	0.000476031	0.000483183	0.000396462	0.000429381	0.00052368	0.000642984	0.000989421	0.000600131	0.000654084	0.000647052	0.001118	0.000927247	0.000763896	0.00108413	0.00105867	0.000912156	0.00122401	0.0012888	0.0014624	0.00134513	0.00140581	0.00143788
w13	Benzoic acid, 2-methyl-, methyl ester	Ester	C9H10O2	89-71-4	floral, ylang-ylang, orange flower, grape	-	-	-	-	-	-	-	-	-	-	-	-	-	-	-	-	-	-	-	-	-	-	-	-	-	-	-	-	-	-	-	-	-	-	-	-	-
XMW0117	3,4-Dimethylcyclohexanol	Alcohol	C8H16O	5715-23-1	-	-	-	-	-	-	-	-	-	-	-	-	-	-	-	-	-	-	-	-	-	-	-	-	-	-	-	-	-	-	-	-	-	-	-	-	-	-
YZMW0527	Phenol, 2-chloro-4-nitro-	Phenol	C6H4ClNO3	619-08-9	-	5	0.00294508	0.00439962	0.00374512	0.0049397	0.00403945	0.00492618	0.00323699	0.00506649	0.00271367	0.00330286	0.00315007	0.00402251	0.00462963	0.00383755	0.00553661	0.00522916	0.00464188	0.00426655	0.00413928	0.00678045	0.00489584	0.00395095	0.00502062	0.00504209	0.00379344	0.00316447	0.00332765	0.00436379	0.0038999	0.00316033	0.00349997	0.00320047	0.00357217	0.00343161	0.0033001	0.00338247
XMW0046	trans-3a-cis-9a-1,2,3,3a,8,9,9a,9b-octahydro-4H-cyclopenta[def]phenanthrene	Aromatics	C15H18	91110-19-9	-	-	-	-	-	-	-	-	-	-	-	-	-	-	-	-	-	-	-	-	-	-	-	-	-	-	-	-	-	-	-	-	-	-	-	-	-	-
XMW0054	Farnesene epoxide, E-	Terpenoids	C15H24O	83637-40-5	-	0.41	2.79989	3.36699	3.17292	3.79753	3.50107	3.80912	2.74284	3.42111	2.66965	2.82061	2.86811	3.08974	2.78551	2.86289	3.45012	3.81681	3.0241	2.9269	2.68225	3.47044	4.282	2.80114	3.14102	3.39623	1.36916	1.42427	1.37327	1.65813	1.52466	1.36077	1.30423	1.26669	1.39652	1.3522	1.39079	1.35293
XMW0051	4-Pyridinecarboxaldehyde	Aldehyde	C6H5NO	872-85-5	fruity	-	-	-	-	-	-	-	-	-	-	-	-	-	-	-	-	-	-	-	-	-	-	-	-	-	-	-	-	-	-	-	-	-	-	-	-	-
XMW0050	Isospathulenol	Terpenoids	C15H24O	88395-46-4	-	-	-	-	-	-	-	-	-	-	-	-	-	-	-	-	-	-	-	-	-	-	-	-	-	-	-	-	-	-	-	-	-	-	-	-	-	-
XMW0049	2,4,4-Trimethyl-3-(3-methylbutyl)cyclohex-2-enone	Ketone	C14H24O	88725-82-0	-	-	-	-	-	-	-	-	-	-	-	-	-	-	-	-	-	-	-	-	-	-	-	-	-	-	-	-	-	-	-	-	-	-	-	-	-	-
w37	2-Cyclohexene-1-carboxaldehyde, 2,6,6-trimethyl-	Aldehyde	C10H16O	432-24-6	-	-	-	-	-	-	-	-	-	-	-	-	-	-	-	-	-	-	-	-	-	-	-	-	-	-	-	-	-	-	-	-	-	-	-	-	-	-
XMW0048	Phenol, 2-nitro-	Phenol	C6H5NO3	88-75-5	-	0.0012	3.75192	3.71522	3.19058	2.71455	3.6093	3.21365	2.64021	3.16017	2.71854	3.26036	2.80342	2.96014	3.17823	3.72228	3.27113	4.12235	3.36034	3.94044	3.36241	3.46884	4.16171	3.66404	3.4639	4.47666	4.62478	4.81592	4.25156	4.74005	4.95777	4.75839	4.13521	4.52348	4.66914	3.89249	4.96225	4.4957
XMW0047	Phenol, 2-(1-methylpropyl)-	Phenol	C10H14O	89-72-5	-	-	-	-	-	-	-	-	-	-	-	-	-	-	-	-	-	-	-	-	-	-	-	-	-	-	-	-	-	-	-	-	-	-	-	-	-	-
XMW0045	(1R,4R,4aS,8aR)-4,7-Dimethyl-1-(prop-1-en-2-yl)-1,2,3,4,4a,5,6,8a-octahydronaphthalene	Terpenoids	C15H24	92692-39-2	-	-	-	-	-	-	-	-	-	-	-	-	-	-	-	-	-	-	-	-	-	-	-	-	-	-	-	-	-	-	-	-	-	-	-	-	-	-
XMW0042	3H-1,2,4-Triazol-3-one, 1,2-dihydro-	Ketone	C2H3N3O	930-33-6	-	-	-	-	-	-	-	-	-	-	-	-	-	-	-	-	-	-	-	-	-	-	-	-	-	-	-	-	-	-	-	-	-	-	-	-	-	-
w40	6,7-Dodecanedione	Ketone	C12H22O2	13757-90-9	-	-	-	-	-	-	-	-	-	-	-	-	-	-	-	-	-	-	-	-	-	-	-	-	-	-	-	-	-	-	-	-	-	-	-	-	-	-
XMW0040	Phenol, 2-methoxy-4-(1-propenyl)-, acetate	Ester	C12H14O3	93-29-8	sweet, spicy, powdery, floral, carnation, balsamic	-	-	-	-	-	-	-	-	-	-	-	-	-	-	-	-	-	-	-	-	-	-	-	-	-	-	-	-	-	-	-	-	-	-	-	-	-
w42	2-Ethyl-1-dodecanol	Alcohol	C14H30O	19780-33-7	-	-	-	-	-	-	-	-	-	-	-	-	-	-	-	-	-	-	-	-	-	-	-	-	-	-	-	-	-	-	-	-	-	-	-	-	-	-
XMW0039	Cycloheptanone, 3-methyl-	Ketone	C8H14O	933-17-5	-	-	-	-	-	-	-	-	-	-	-	-	-	-	-	-	-	-	-	-	-	-	-	-	-	-	-	-	-	-	-	-	-	-	-	-	-	-
w43	2-Oxepanone	Ester	C6H10O2	502-44-3	-	-	-	-	-	-	-	-	-	-	-	-	-	-	-	-	-	-	-	-	-	-	-	-	-	-	-	-	-	-	-	-	-	-	-	-	-	-
w44	Butanoic acid, 2-butoxy-1-methyl-2-oxoethyl ester	Ester	C11H20O4	7492-70-8	creamy, buttery, buttermilky, dairy, cheese	-	-	-	-	-	-	-	-	-	-	-	-	-	-	-	-	-	-	-	-	-	-	-	-	-	-	-	-	-	-	-	-	-	-	-	-	-
XMW0034	2-Dimethylamino-4-methyl-pent-4-enenitrile	Amine	C8H14N2	94492-10-1	-	-	-	-	-	-	-	-	-	-	-	-	-	-	-	-	-	-	-	-	-	-	-	-	-	-	-	-	-	-	-	-	-	-	-	-	-	-
XMW0062	2-Propenoic acid, 2-methyl-, 3,3,5-trimethylcyclohexyl ester	Ester	C13H22O2	7779-31-9	-	-	-	-	-	-	-	-	-	-	-	-	-	-	-	-	-	-	-	-	-	-	-	-	-	-	-	-	-	-	-	-	-	-	-	-	-	-
w31	Butanoic acid, 4-hexenyl ester, (Z)-	Ester	C10H18O2	69727-41-9	-	-	-	-	-	-	-	-	-	-	-	-	-	-	-	-	-	-	-	-	-	-	-	-	-	-	-	-	-	-	-	-	-	-	-	-	-	-
XMW0114	Benzene, nitroso-	Nitrogen compounds	C6H5NO	586-96-9	-	0.15	1.51491	1.57934	1.53682	1.5164	1.65134	1.58754	1.39716	1.64234	1.48298	1.5106	1.40521	1.41035	1.62285	1.71855	1.73175	1.68664	1.64287	1.77818	1.69094	1.84265	1.8509	1.81587	1.60738	1.6785	0.655165	0.797172	0.721666	0.766603	0.737138	0.748224	0.845236	0.701943	0.693222	0.721393	0.694901	0.697997
XMW0091	3-Isopropylidene-5-methyl-hex-4-en-2-one	Ketone	C10H16O	64149-32-2	-	-	-	-	-	-	-	-	-	-	-	-	-	-	-	-	-	-	-	-	-	-	-	-	-	-	-	-	-	-	-	-	-	-	-	-	-	-
w14	Octane, 1,1'-oxybis-	Ether	C16H34O	629-82-3	-	-	-	-	-	-	-	-	-	-	-	-	-	-	-	-	-	-	-	-	-	-	-	-	-	-	-	-	-	-	-	-	-	-	-	-	-	-
XMW0111	Spiro[4.5]decan-7-one, 1,8-dimethyl-8,9-epoxy-4-isopropyl-	Terpenoids	C15H24O2	61050-91-7	-	-	-	-	-	-	-	-	-	-	-	-	-	-	-	-	-	-	-	-	-	-	-	-	-	-	-	-	-	-	-	-	-	-	-	-	-	-
w19	2H-Pyran-2-one, tetrahydro-6-propyl-	Ketone	C8H14O2	698-76-0	coconut	0.42	0.181497	0.217235	0.209899	0.210753	0.185706	0.2132	0.197929	0.242845	0.199205	0.205299	0.206635	0.207222	0.189999	0.205821	0.183034	0.194254	0.190865	0.205537	0.206071	0.209556	0.209532	0.211812	0.205988	0.200666	0.190095	0.202014	0.207438	0.199358	0.219278	0.200159	0.210699	0.242079	0.262483	0.235199	0.239925	0.24793
XMW0107	1,2-Benzenedimethanol	Alcohol	C8H10O2	612-14-6	-	-	-	-	-	-	-	-	-	-	-	-	-	-	-	-	-	-	-	-	-	-	-	-	-	-	-	-	-	-	-	-	-	-	-	-	-	-
XMW0102	Propanenitrile, 3-(butylphenylamino)-	Nitrogen compounds	C13H18N2	61852-40-2	-	-	-	-	-	-	-	-	-	-	-	-	-	-	-	-	-	-	-	-	-	-	-	-	-	-	-	-	-	-	-	-	-	-	-	-	-	-
XMW0101	1-Ethylpropyl acetate	Ester	C7H14O2	620-11-1	-	0.009	4.84272	4.31748	4.62759	3.98154	4.41102	4.3848	4.94817	5.17157	4.76967	4.2482	5.24647	4.39268	3.73717	4.3938	3.54277	3.49262	3.78694	3.76732	4.66264	4.72606	4.40444	5.18658	4.89424	4.6325	4.44202	5.4866	5.27517	5.39072	5.09578	4.68522	6.13706	6.08347	5.87799	6.27666	6.57462	6.42643
XMW0100	Octane, 5-ethyl-2-methyl-	Hydrocarbons	C11H24	62016-18-6	-	-	-	-	-	-	-	-	-	-	-	-	-	-	-	-	-	-	-	-	-	-	-	-	-	-	-	-	-	-	-	-	-	-	-	-	-	-
XMW0094	Hexanoic acid, 2-phenylethyl ester	Ester	C14H20O2	6290-37-5	sweet, honey, floral, waxy, woody, sweaty, green, banana, pineapple	0.005	1.44747	1.70725	1.55159	2.15915	1.73385	2.47186	1.56634	1.98517	1.51092	1.39597	1.38218	1.60821	1.8873	1.39055	2.08688	2.18254	1.30842	1.60361	1.7347	2.84048	2.12776	1.84004	2.31884	2.48822	2.43124	2.67808	2.28589	3.005	2.56912	1.91557	3.38231	2.74344	3.99089	2.71379	3.68804	3.60414
XMW0090	Heptadecane, 3-methyl-	Hydrocarbons	C18H38	6418-44-6	-	-	-	-	-	-	-	-	-	-	-	-	-	-	-	-	-	-	-	-	-	-	-	-	-	-	-	-	-	-	-	-	-	-	-	-	-	-
w28	3(2H)-Furanone, dihydro-2-methyl-	Ketone	C5H8O2	3188-00-9	sweet, solvent, bread, buttery, nutty	5e-06	196607	188699	188732	171311	190650	182565	191658	206266	196411	199259	190154	173827	155489	175552	150557	145017	158710	162880	188106	168915	182773	205311	193091	184753	187154	208776	197770	200094	198292	201703	224760	222765	156328	227598	236505	229898
w21	2H-Pyran-2-one, 6-pentyl-	Ketone	C10H14O2	27593-23-3	tonka, lactonic, coconut, creamy, fatty, waxy	0.15	3.38865	3.82467	3.56639	4.04205	3.8449	4.00209	2.85656	3.40834	2.74844	2.87637	2.78995	3.00678	2.96338	2.92173	3.23098	3.40144	3.04141	3.04799	3.66061	4.47857	5.1893	3.94554	4.11885	4.22474	3.41057	3.43348	3.29668	3.79987	3.56825	3.30223	3.79211	3.80286	3.89417	3.91683	3.85011	3.80383
XMW0087	1-Pentanone, 1-(p-anisyl)-3-methyl-	Ketone	C13H18O2	66333-82-2	-	-	-	-	-	-	-	-	-	-	-	-	-	-	-	-	-	-	-	-	-	-	-	-	-	-	-	-	-	-	-	-	-	-	-	-	-	-
XMW0086	3-(Benzo(b)thien-6-yl)propionic acid	Acid	C11H10O2S	6701-52-6	-	-	-	-	-	-	-	-	-	-	-	-	-	-	-	-	-	-	-	-	-	-	-	-	-	-	-	-	-	-	-	-	-	-	-	-	-	-
XMW0083	2H-Cyclopropa[a]naphthalen-2-one, 1,1a,4,5,6,7,7a,7b-octahydro-1,1,7,7a-tetramethyl-, (1a.alpha.,7.alpha.,7a.alpha.,7b.alpha.)-	Terpenoids	C15H22O	6831-17-0	-	-	-	-	-	-	-	-	-	-	-	-	-	-	-	-	-	-	-	-	-	-	-	-	-	-	-	-	-	-	-	-	-	-	-	-	-	-
XMW0071	2-Pentyn-4-one	Ketone	C5H6O	7299-55-0	-	-	-	-	-	-	-	-	-	-	-	-	-	-	-	-	-	-	-	-	-	-	-	-	-	-	-	-	-	-	-	-	-	-	-	-	-	-
w22	(Z)-γ-Jasmolactone	Ester	C10H16O2	63095-33-0	creamy, coconut, buttery	-	-	-	-	-	-	-	-	-	-	-	-	-	-	-	-	-	-	-	-	-	-	-	-	-	-	-	-	-	-	-	-	-	-	-	-	-
XMW0065	Fomepizole	Heterocyclic compound	C4H6N2	7554-65-6	-	-	-	-	-	-	-	-	-	-	-	-	-	-	-	-	-	-	-	-	-	-	-	-	-	-	-	-	-	-	-	-	-	-	-	-	-	-
w24	3-Buten-2-one, 4-(4-hydroxy-2,2,6-trimethyl-7-oxabicyclo[4.1.0]hept-1-yl)-	Ketone	C13H20O3	38274-01-0	-	-	-	-	-	-	-	-	-	-	-	-	-	-	-	-	-	-	-	-	-	-	-	-	-	-	-	-	-	-	-	-	-	-	-	-	-	-
XMW0165	Cyclohexanol, 3-ethenyl-3-methyl-2-(1-methylethenyl)-6-(1-methylethyl)-, [1R-(1.alpha.,2.alpha.,3.beta.,6.alpha.)]-	Terpenoids	C15H26O	35727-45-8	-	-	-	-	-	-	-	-	-	-	-	-	-	-	-	-	-	-	-	-	-	-	-	-	-	-	-	-	-	-	-	-	-	-	-	-	-	-
XMW0167	1-(2,3,4,5-Tetramethylphenyl)ethanone	Ketone	C12H16O	34764-71-1	-	-	-	-	-	-	-	-	-	-	-	-	-	-	-	-	-	-	-	-	-	-	-	-	-	-	-	-	-	-	-	-	-	-	-	-	-	-
YZMW0680	Cyclotridecanone	Ketone	C13H24O	832-10-0	-	0.31	0.0238509	0.0364874	0.0356008	0.0404166	0.0314639	0.049967	0.0170917	0.0307353	0.0155679	0.0201924	0.018808	0.0233494	0.0289159	0.0324932	0.0614104	0.0628339	0.0400754	0.0349326	0.0280566	0.0517446	0.0560788	0.0262163	0.0423787	0.0452835	0.0317969	0.0316837	0.0346565	0.0662447	0.0497964	0.0421056	0.0405708	0.0321209	0.0314564	0.0288688	0.0327118	0.0348406
XMW0275	3,5,9-Undecatrien-2-one, 6,10-dimethyl-	Ketone	C13H20O	141-10-6	sweet, waxy, citrus, floral, balsamic, dry, dusty, powdery, spicy	0.8	0.916896	1.06226	0.996012	1.18655	1.10804	1.15369	0.9434	1.05956	0.893042	0.920444	0.924259	0.980188	0.917632	0.9501	1.07092	1.16464	1.00242	0.960406	0.848189	1.06873	1.30794	0.900183	0.96578	1.04586	0.44295	0.449682	0.421692	0.504327	0.476907	0.434802	0.428782	0.415283	0.453975	0.448794	0.461964	0.449032
XMW0290	4-Heptanone, oxime	Nitrogen compounds	C7H15NO	1188-63-2	-	-	-	-	-	-	-	-	-	-	-	-	-	-	-	-	-	-	-	-	-	-	-	-	-	-	-	-	-	-	-	-	-	-	-	-	-	-
XMW0289	2-Acetyl-5-methylfuran	Heterocyclic compound	C7H8O2	1193-79-9	strong, musty, nutty, hay, coconut, coumarin, milky	40.87	0.0033261	0.00344846	0.00326471	0.00345449	0.00369186	0.00360821	0.00356983	0.00428456	0.00369675	0.0036242	0.00339454	0.00354953	0.00217956	0.00229508	0.00239246	0.00220458	0.00245955	0.0022136	0.00202252	0.00218407	0.00229652	0.00227351	0.00265757	0.00205545	0.00117615	0.00136205	0.00136696	0.00137807	0.00128348	0.0014864	0.00195717	0.00168373	0.00164225	0.00189929	0.00173248	0.00189339
XMW0288	Cyclopenta[c]pentalen-3(3aH)-one, octahydro-1,2,3a,6-tetramethyl-	Ketone	C15H24O	120052-69-9	-	-	-	-	-	-	-	-	-	-	-	-	-	-	-	-	-	-	-	-	-	-	-	-	-	-	-	-	-	-	-	-	-	-	-	-	-	-
XMW0287	Benzoic acid, 2-methylpropyl ester	Ester	C11H14O2	120-50-3	sweet, fruity, musty, powdery, balsamic	-	-	-	-	-	-	-	-	-	-	-	-	-	-	-	-	-	-	-	-	-	-	-	-	-	-	-	-	-	-	-	-	-	-	-	-	-
XMW0737	Ethanone, 1-(2-hydroxy-5-methylphenyl)-	Ketone	C9H10O2	1450-72-2	sweet, heavy, floral, herbal	-	-	-	-	-	-	-	-	-	-	-	-	-	-	-	-	-	-	-	-	-	-	-	-	-	-	-	-	-	-	-	-	-	-	-	-	-
XMW0280	Carbonic acid, phenyl propyl ester	Ester	C10H12O3	13183-16-9	-	-	-	-	-	-	-	-	-	-	-	-	-	-	-	-	-	-	-	-	-	-	-	-	-	-	-	-	-	-	-	-	-	-	-	-	-	-
XMW0278	1,2,4-Trimethoxybenzene	Ether	C9H12O3	135-77-3	-	-	-	-	-	-	-	-	-	-	-	-	-	-	-	-	-	-	-	-	-	-	-	-	-	-	-	-	-	-	-	-	-	-	-	-	-	-
XMW0276	4-Hexen-3-one, 5-methyl-	Ketone	C7H12O	13905-10-7	-	-	-	-	-	-	-	-	-	-	-	-	-	-	-	-	-	-	-	-	-	-	-	-	-	-	-	-	-	-	-	-	-	-	-	-	-	-
XMW0272	4-Pyridinecarboxamide	Heterocyclic compound	C6H6N2O	1453-82-3	-	-	-	-	-	-	-	-	-	-	-	-	-	-	-	-	-	-	-	-	-	-	-	-	-	-	-	-	-	-	-	-	-	-	-	-	-	-
XMW0271	Cadina-1(10),6,8-triene	Terpenoids	C15H22	1460-96-4	-	-	-	-	-	-	-	-	-	-	-	-	-	-	-	-	-	-	-	-	-	-	-	-	-	-	-	-	-	-	-	-	-	-	-	-	-	-
YZMW0565	Benzenamine, 2,4,6-trichloro-	Amine	C6H4Cl3N	634-93-5	-	0.05	0.946007	0.986969	0.914926	0.987735	1.03283	1.02876	0.881628	0.907567	0.824492	0.839081	0.773746	0.880972	0.846592	0.850772	0.957162	1.0735	0.931295	0.997251	0.952463	1.17345	1.62729	1.13585	1.0823	1.18456	0.908308	1.03845	0.960052	1.04222	1.00828	0.988582	0.919094	0.850951	0.882512	0.88142	0.842569	0.866585
XMW0269	2-Methylbutanoic anhydride	Acid	C10H18O3	1468-39-9	-	-	-	-	-	-	-	-	-	-	-	-	-	-	-	-	-	-	-	-	-	-	-	-	-	-	-	-	-	-	-	-	-	-	-	-	-	-
YZMW0566	1H-Pyrrole-2-carboxylic acid	Acid	C5H5NO2	634-97-9	-	3330	6.46292e-06	6.54252e-06	6.48592e-06	5.85797e-06	6.10844e-06	6.40335e-06	6.96482e-06	7.3832e-06	6.71869e-06	6.92885e-06	7.20033e-06	7.27109e-06	7.70106e-06	6.68419e-06	6.92137e-06	6.51618e-06	7.71307e-06	7.86979e-06	7.54822e-06	5.79648e-06	8.92889e-06	7.27955e-06	6.75941e-06	6.93433e-06	6.54632e-06	7.15414e-06	6.92783e-06	6.90125e-06	7.06403e-06	6.65809e-06	6.61899e-06	6.14666e-06	6.99794e-06	6.70552e-06	7.24031e-06	7.08002e-06
XMW0263	(1R,4S,9aS)-1-Methyl-4-((Z)-pent-2-en-4-yn-1-yl)octahydro-1H-quinolizine	Heterocyclic compound	C15H23N	151805-13-9	-	-	-	-	-	-	-	-	-	-	-	-	-	-	-	-	-	-	-	-	-	-	-	-	-	-	-	-	-	-	-	-	-	-	-	-	-	-
XMW0262	1,1,7,7a-Tetramethyl-1a,2,6,7,7a,7b-hexahydro-1H-cyclopropa[a]naphthalene	Terpenoids	C15H22	154098-14-3	-	-	-	-	-	-	-	-	-	-	-	-	-	-	-	-	-	-	-	-	-	-	-	-	-	-	-	-	-	-	-	-	-	-	-	-	-	-
XMW0261	Heptadecane, 2-methyl-	Hydrocarbons	C18H38	1560-89-0	-	-	-	-	-	-	-	-	-	-	-	-	-	-	-	-	-	-	-	-	-	-	-	-	-	-	-	-	-	-	-	-	-	-	-	-	-	-
XMW0260	Hexadecane, 2-methyl-	Hydrocarbons	C17H36	1560-92-5	-	-	-	-	-	-	-	-	-	-	-	-	-	-	-	-	-	-	-	-	-	-	-	-	-	-	-	-	-	-	-	-	-	-	-	-	-	-
YZMW0556	Enanthamide	Amine	C7H15NO	628-62-6	-	1290	2.99102e-05	3.22019e-05	3.22225e-05	3.24324e-05	3.32646e-05	3.22574e-05	3.01379e-05	3.40853e-05	3.00938e-05	3.07233e-05	3.11439e-05	3.15519e-05	2.97583e-05	3.09237e-05	2.59685e-05	2.51323e-05	3.33753e-05	3.32519e-05	3.13476e-05	2.39978e-05	3.84394e-05	3.38088e-05	3.30449e-05	3.47801e-05	2.90356e-05	3.40713e-05	3.30051e-05	3.20401e-05	3.23351e-05	3.32846e-05	3.66483e-05	3.62922e-05	3.64057e-05	3.77076e-05	3.76728e-05	3.73093e-05
YZMW0555	Benzenamine, 2-chloro-5-nitro-	Amine	C6H5ClN2O2	6283-25-6	-	25	0.000193051	0.000174561	0.00018432	0.000245249	0.000216982	0.000163327	0.000170914	0.000182368	0.000191349	0.000237489	0.000227749	0.0002102	0.000213892	0.000198434	0.000209151	0.000276188	0.000210846	0.00020791	0.000243366	0.000218782	0.000412015	0.000216457	0.000304785	0.000264599	0.000281247	0.000263683	0.000260168	0.000335168	0.000315741	0.00031901	0.000322837	0.000305106	0.000340916	0.000262573	0.000307145	0.000306896
XMW0177	Ethanone, 1-(2-methyl-1-cyclopenten-1-yl)-	Ketone	C8H12O	3168-90-9	-	-	-	-	-	-	-	-	-	-	-	-	-	-	-	-	-	-	-	-	-	-	-	-	-	-	-	-	-	-	-	-	-	-	-	-	-	-
XMW0379	Bicyclo[5.2.0]nonane, 2-methylene-4,8,8-trimethyl-4-vinyl-	Terpenoids	C15H24	242794-76-9	-	-	-	-	-	-	-	-	-	-	-	-	-	-	-	-	-	-	-	-	-	-	-	-	-	-	-	-	-	-	-	-	-	-	-	-	-	-
XMW0388	Selina-3,7(11)-diene	Terpenoids	C15H24	6813-21-4	-	-	-	-	-	-	-	-	-	-	-	-	-	-	-	-	-	-	-	-	-	-	-	-	-	-	-	-	-	-	-	-	-	-	-	-	-	-
XMW0387	Dodecane, 1-iodo-	Halogenated hydrocarbons	C12H25I	4292-19-7	-	-	-	-	-	-	-	-	-	-	-	-	-	-	-	-	-	-	-	-	-	-	-	-	-	-	-	-	-	-	-	-	-	-	-	-	-	-
YZMW0529	Urea, N-ethyl-N'-phenyl-	Amine	C9H12N2O	621-04-5	-	164	9.09547e-05	0.000134136	0.000141808	0.000162713	0.00017418	0.000172368	0.000123534	0.000173855	0.000102521	0.000121315	0.000119316	0.000158586	0.000118454	9.33822e-05	0.000164536	0.000162388	0.000147647	0.000123775	0.000118343	0.000211909	0.00023003	0.000148292	0.000169575	0.000204982	8.58714e-05	8.98485e-05	0.000103825	0.000122351	0.000118261	0.000106954	8.82246e-05	8.41935e-05	9.10606e-05	0.000101146	8.60493e-05	8.37876e-05
YZMW0530	Phenol, 3-propyl-	Phenol	C9H12O	621-27-2	-	0.00029	64.7037	58.7701	52.7183	70.908	60.3379	60.3838	57.7045	72.4777	59.3741	58.1949	54.6844	55.2102	30.1663	39.6696	43.0959	45.2887	29.8579	28.5945	54.2734	64.7995	61.797	59.1751	53.893	44.9457	50.6128	45.3439	40.6114	45.6378	46.7708	37.1931	57.5867	66.208	52.8097	60.1125	66.5889	62.2714
XMW0385	Carotol	Terpenoids	C15H26O	465-28-1	pleasent, mild	0.008	29.6463	33.6393	30.3914	34.458	33.945	33.1881	29.4225	32.1599	28.5718	29.578	28.6723	30.3016	28.7792	29.9723	31.7977	34.1801	31.1203	29.6397	38.4167	45.023	61.713	41.5513	42.3372	44.9074	27.509	30.062	28.5005	31.2305	30.4745	28.839	32.5534	32.3366	33.6437	33.4775	33.6405	33.3871
XMW0384	4,7-Methanoazulene, 1,2,3,4,5,6,7,8-octahydro-1,4,9,9-tetramethyl-, [1S-(1.alpha.,4.alpha.,7.alpha.)]-	Terpenoids	C15H24	514-51-2	-	-	-	-	-	-	-	-	-	-	-	-	-	-	-	-	-	-	-	-	-	-	-	-	-	-	-	-	-	-	-	-	-	-	-	-	-	-
YZMW0531	Benzeneacetic acid, 3-hydroxy-	Acid	C8H8O3	621-37-4	-	10	0.00188123	0.00217996	0.00188671	0.00230012	0.00216051	0.00206256	0.00165752	0.00201782	0.0017736	0.0016947	0.00182023	0.00180518	0.00190921	0.0019103	0.0021801	0.00213054	0.00199814	0.00210064	0.00222993	0.00241995	0.00320206	0.00211758	0.00237523	0.00267095	0.00184512	0.00247087	0.00183809	0.00215961	0.00228787	0.00214214	0.00252045	0.00242769	0.00263007	0.00237665	0.00239068	0.00237864
YZMW0540	2-Heptanol, 2-methyl-	Alcohol	C8H18O	625-25-2	-	0.16	0.0813054	0.0853346	0.0882663	0.0900371	0.0937875	0.0834167	0.0638033	0.0787486	0.0741423	0.076993	0.0687584	0.0807739	0.0650355	0.0655173	0.0641656	0.0761537	0.0702723	0.0634571	0.0653795	0.0703042	0.0696302	0.0705233	0.0712186	0.0626926	0.0581745	0.0692337	0.0705663	0.0746908	0.0755458	0.0697279	0.0843297	0.091455	0.082041	0.0955813	0.0959136	0.0847183
XMW0372	Tridecane, 4,8-dimethyl-	Hydrocarbons	C15H32	55030-62-1	-	-	-	-	-	-	-	-	-	-	-	-	-	-	-	-	-	-	-	-	-	-	-	-	-	-	-	-	-	-	-	-	-	-	-	-	-	-
XMW0297	1,4-Butanediamine	Amine	C4H12N2	110-60-1	animalic, rotten, fishy	22	0.00115581	0.00112269	0.00127907	0.00116474	0.00112088	0.00114068	0.000916964	0.00111509	0.000954179	0.000970756	0.00102035	0.00101878	0.00100028	0.000949799	0.000823769	0.00103185	0.000948844	0.00094492	0.00087054	0.00101665	0.000974161	0.000840397	0.000798251	0.000885993	0.000801893	0.000935713	0.000913041	0.000918423	0.000928784	0.00089507	0.00105762	0.00104564	0.000974206	0.00126748	0.00126232	0.00110532
YZMW0545	.alpha.-Aminoisobutanoic acid	Acid	C4H9NO2	62-57-7	-	361	2.2333e-05	2.62151e-05	2.50955e-05	2.07856e-05	3.0549e-05	2.4836e-05	2.55736e-05	2.42642e-05	2.89137e-05	2.57826e-05	2.62509e-05	2.31965e-05	2.49114e-05	3.18671e-05	2.89355e-05	1.9947e-05	3.30836e-05	2.2358e-05	2.94869e-05	2.81122e-05	2.49534e-05	2.98747e-05	2.94609e-05	3.24935e-05	2.9686e-05	3.26965e-05	2.65664e-05	2.82264e-05	2.57456e-05	3.15078e-05	2.47053e-05	2.3758e-05	2.63693e-05	2.59376e-05	2.53108e-05	2.23677e-05
XMW0358	1-Pentanone, 1-(2-furanyl)-	Ketone	C9H12O2	3194-17-0	sweet, caramel	-	-	-	-	-	-	-	-	-	-	-	-	-	-	-	-	-	-	-	-	-	-	-	-	-	-	-	-	-	-	-	-	-	-	-	-	-
XMW0355	1,3-Diazabicyclo[3.1.0]hexane	Heterocyclic compound	C4H8N2	17038-28-7	-	-	-	-	-	-	-	-	-	-	-	-	-	-	-	-	-	-	-	-	-	-	-	-	-	-	-	-	-	-	-	-	-	-	-	-	-	-
YZMW0549	Pentanamide	Amine	C5H11NO	626-97-1	-	1770	1.88547e-05	1.93808e-05	2.03123e-05	1.94066e-05	1.90598e-05	1.84685e-05	7.23637e-06	9.76915e-06	6.94711e-06	7.30291e-06	6.62595e-06	6.82103e-06	1.74936e-05	1.61158e-05	1.62156e-05	1.83715e-05	1.92712e-05	1.81499e-05	7.54278e-06	7.56227e-06	9.0499e-06	9.00578e-06	8.37529e-06	8.23948e-06	7.62082e-06	7.61053e-06	7.12525e-06	7.64986e-06	8.20914e-06	8.10854e-06	1.10871e-05	1.06014e-05	1.01153e-05	1.24334e-05	1.35743e-05	1.32335e-05
XMW0310	2H-Pyran-2-methanol, tetrahydro-	Alcohol	C6H12O2	100-72-1	-	-	-	-	-	-	-	-	-	-	-	-	-	-	-	-	-	-	-	-	-	-	-	-	-	-	-	-	-	-	-	-	-	-	-	-	-	-
XMW0309	Piperidin-3-one, 2,2,5-methyl-	Ketone	C8H15NO	103634-57-7	-	-	-	-	-	-	-	-	-	-	-	-	-	-	-	-	-	-	-	-	-	-	-	-	-	-	-	-	-	-	-	-	-	-	-	-	-	-
XMW0303	Hexanoic acid, 5-hexenyl ester	Ester	C12H22O2	108058-81-7	-	-	-	-	-	-	-	-	-	-	-	-	-	-	-	-	-	-	-	-	-	-	-	-	-	-	-	-	-	-	-	-	-	-	-	-	-	-
XMW0259	Pentadecane, 2-methyl-	Hydrocarbons	C16H34	1560-93-6	-	-	-	-	-	-	-	-	-	-	-	-	-	-	-	-	-	-	-	-	-	-	-	-	-	-	-	-	-	-	-	-	-	-	-	-	-	-
YZMW0568	Ethanethioamide, N-phenyl-	Amine	C8H9NS	637-53-6	-	1.5	0.023039	0.0264215	0.0223848	0.0288991	0.0263579	0.0269311	0.0235053	0.0254317	0.020971	0.0225299	0.02401	0.0243216	0.0210374	0.0213042	0.0238581	0.0272058	0.0236702	0.0210616	0.0224494	0.0244935	0.0341369	0.0219214	0.0227004	0.0255876	0.0110153	0.0117607	0.0106452	0.012197	0.011731	0.0107308	0.0114455	0.0113047	0.0122394	0.0112661	0.0115915	0.0123893
YZMW0658	Cyclohexene, 1-phenyl-	Aromatics	C12H14	771-98-2	-	0.01	38.0207	41.8216	37.9696	40.2593	41.1091	40.4305	37.284	40.217	36.4439	37.2789	37.225	37.0936	27.614	29.1762	28.2152	28.8701	29.3658	29.2746	36.6774	37.142	48.1312	38.9034	37.0516	38.5332	23.7163	26.9622	25.5935	25.6869	25.9432	25.6843	30.8793	31.2397	31.8021	33.3634	33.2851	32.8966
XMW0213	Isopentyl hexanoate	Ester	C11H22O2	2198-61-0	fruity, banana, apple, pineapple, green	0.32	0.0466524	0.0629553	0.0596692	0.059504	0.0662567	0.0713243	0.0438514	0.0549715	0.0463037	0.0472817	0.0459048	0.0498706	0.0632258	0.0607024	0.0580869	0.0623855	0.076708	0.0786691	0.0653621	0.01508	0.0873114	0.0643102	0.077543	0.0740298	0.0485787	0.057071	0.0556328	0.0593738	0.0473339	0.0624345	0.0842671	0.0732187	0.107842	0.0801867	0.0862186	0.0742807
XMW0211	3-Pentyl-4,5,6,7-tetrahydro-1H-indazole	Heterocyclic compound	C12H20N2	22122-91-4	-	-	-	-	-	-	-	-	-	-	-	-	-	-	-	-	-	-	-	-	-	-	-	-	-	-	-	-	-	-	-	-	-	-	-	-	-	-
XMW0209	1,4-Cyclohexadiene-1-methanol, 4-(1-methylethyl)-	Alcohol	C10H16O	22539-72-6	-	-	-	-	-	-	-	-	-	-	-	-	-	-	-	-	-	-	-	-	-	-	-	-	-	-	-	-	-	-	-	-	-	-	-	-	-	-
XMW0208	Octanoic acid, octyl ester	Ester	C16H32O2	2306-88-9	coconut, oily, fruity	-	-	-	-	-	-	-	-	-	-	-	-	-	-	-	-	-	-	-	-	-	-	-	-	-	-	-	-	-	-	-	-	-	-	-	-	-
XMW0206	1H-Pyrazolo[3,4-d]pyrimidin-4-amine	Amine	C5H5N5	2380-63-4	-	-	-	-	-	-	-	-	-	-	-	-	-	-	-	-	-	-	-	-	-	-	-	-	-	-	-	-	-	-	-	-	-	-	-	-	-	-
XMW0203	2,5-di-tert-Butyl-1,4-benzoquinone	Ketone	C14H20O2	2460-77-7	-	-	-	-	-	-	-	-	-	-	-	-	-	-	-	-	-	-	-	-	-	-	-	-	-	-	-	-	-	-	-	-	-	-	-	-	-	-
YZMW0657	2H-Pyran-2-one, 3-acetyl-4-hydroxy-6-methyl-	Acid	C8H8O4	771-03-9	-	0.37	0.0294123	0.0350388	0.0308749	0.0348933	0.0317177	0.00733497	0.0404949	0.0404329	0.035043	0.036262	0.0389058	0.0408096	0.0431424	0.041806	0.0481353	0.0510239	0.0465915	0.0428969	0.0545206	0.0621025	0.0829896	0.0581414	0.0583881	0.0623885	0.210361	0.208175	0.203617	0.240318	0.22368	0.206186	0.227257	0.22328	0.232358	0.222727	0.226462	0.220228
XMW0198	3-Buten-2-ol, 4-(2,6,6-trimethyl-2-cyclohexen-1-yl)-, (3E)-	Alcohol	C13H22O	25312-34-9	ionone, tropical, sweet, floral, violet, woody	-	-	-	-	-	-	-	-	-	-	-	-	-	-	-	-	-	-	-	-	-	-	-	-	-	-	-	-	-	-	-	-	-	-	-	-	-
XMW0194	7-Oxabicyclo[4.1.0]heptane	Heterocyclic compound	C6H10O	286-20-4	-	-	-	-	-	-	-	-	-	-	-	-	-	-	-	-	-	-	-	-	-	-	-	-	-	-	-	-	-	-	-	-	-	-	-	-	-	-
YZMW0576	1-Phenylthiosemicarbazide	Amine	C7H9N3S	645-48-7	-	0.8	0.00653713	0.0074744	0.00670194	0.00775405	0.00660178	0.00709694	0.0086001	0.00878634	0.00803924	0.00851254	0.00715902	0.00673406	0.00698675	0.00929458	0.0115001	0.00745334	0.00766242	0.0076069	0.00802554	0.00881905	0.0101379	0.00989061	0.01075	0.0103617	0.00935922	0.00793918	0.00722794	0.0111803	0.00975067	0.0072868	0.00703121	0.00902263	0.00555959	0.00747081	0.00838843	0.00707711
YZMW0659	4-Phenylpiperidine	Heterocyclic compound	C11H15N	771-99-3	-	48	0.000122941	0.000141971	0.000108479	2.07862e-05	0.000105395	0.000105647	0.000131032	0.000203533	0.000152655	0.000150011	0.000161288	0.000149105	0.00022362	0.00021382	0.000204796	0.0001916	0.000199765	0.000212074	0.000269459	0.000329311	0.00042377	0.000260022	0.000259518	0.000295763	0.00053517	0.000499072	0.000550693	0.000566812	0.000500349	0.000539724	0.000487408	0.000496605	0.000488605	0.000495239	0.000468418	0.000463342
XMW0189	3-Cyclohexene-1-acetaldehyde, .alpha.,4-dimethyl-	Aldehyde	C10H16O	29548-14-9	spicy, herbal	-	-	-	-	-	-	-	-	-	-	-	-	-	-	-	-	-	-	-	-	-	-	-	-	-	-	-	-	-	-	-	-	-	-	-	-	-
YZMW0664	3-Cyclohexene-1-methanol, .alpha.,.alpha.,4-trimethyl-, (R)-	Terpenoids	C10H18O	7785-53-7	minty, anisic, lilac, floral, terpene, pine, citrus, oily, woody	6.8	0.00180073	0.0020067	0.00201064	0.0020344	0.00230528	0.00222838	0.00153782	0.00202679	0.00147981	0.00152889	0.0013961	0.00167561	0.00112611	0.00114433	0.00100241	0.00104638	0.00153266	0.00143332	0.0013721	0.00174905	0.00205438	0.00161397	0.00183212	0.00180202	0.00148312	0.00159236	0.00151958	0.00156971	0.00143242	0.00150503	0.00286587	0.00229901	0.00247582	0.00256633	0.00267449	0.00253119
YZMW0670	Hydrazinecarbothioamide	Nitrogen compounds	CH5N3S	79-19-6	-	46	0.00202243	0.00218079	0.00232645	0.00243438	0.00247825	0.00247841	0.00230094	0.0027767	0.00221531	0.00238796	0.00221694	0.00237149	0.00233468	0.00211528	0.00258946	0.00258669	0.0026054	0.00246652	0.0023535	0.00273087	0.00308401	0.00262224	0.00275643	0.00270468	0.00207266	0.00222776	0.00229047	0.00220756	0.0023284	0.00202741	0.00200086	0.00182828	0.00165084	0.00184962	0.00186389	0.00176233
XMW0184	1-(1-Adamantyl)-1-phenylethanol	Alcohol	C18H24O	303797-64-0	-	-	-	-	-	-	-	-	-	-	-	-	-	-	-	-	-	-	-	-	-	-	-	-	-	-	-	-	-	-	-	-	-	-	-	-	-	-
XMW0183	2-Heptenal, 2-methyl-	Aldehyde	C8H14O	30567-26-1	-	-	-	-	-	-	-	-	-	-	-	-	-	-	-	-	-	-	-	-	-	-	-	-	-	-	-	-	-	-	-	-	-	-	-	-	-	-
XMW0178	Acetic acid, (1,2,3,4,5,6,7,8-octahydro-3,8,8-trimethylnaphth-2-yl)methyl ester	Ester	C16H26O2	314773-27-8	-	-	-	-	-	-	-	-	-	-	-	-	-	-	-	-	-	-	-	-	-	-	-	-	-	-	-	-	-	-	-	-	-	-	-	-	-	-
YZMW0629	2H-Pyran-2-one, tetrahydro-6-undecyl-	Ester	C16H30O2	7370-44-7	-	43	0.000129444	0.000186024	0.00013807	0.000141335	0.000128368	0.000130306	0.000208443	0.000168074	0.000173963	0.000194636	0.000128493	0.000138065	0.000151366	0.000169779	0.000188982	0.000129165	0.000167023	0.000193143	0.000143008	0.000143833	0.0001818	0.000177427	0.000166144	0.000184281	0.000343765	0.000199141	0.000272884	0.000315751	0.000302657	0.000280107	0.000227965	0.000316726	0.00018756	0.000265236	0.000339784	0.00030957
XMW0217	cis-7-Decen-1-al	Aldehyde	C10H18O	21661-97-2	citrus, aldehydic, cucumber	0.0022	8.72145	9.56012	7.82729	2.73272	2.43389	6.26182	8.55959	6.7484	6.90026	7.68737	7.90527	7.37713	6.46617	6.03087	3.14275	1.16756	5.33795	7.43754	6.24506	3.61146	7.65954	7.0453	5.85483	5.75963	3.93378	3.05629	5.02755	4.08781	3.07504	4.57118	5.23184	4.34162	4.81074	5.44468	4.96727	6.05753
XMW0218	Hexadecane, 7,9-dimethyl-	Hydrocarbons	C18H38	21164-95-4	-	-	-	-	-	-	-	-	-	-	-	-	-	-	-	-	-	-	-	-	-	-	-	-	-	-	-	-	-	-	-	-	-	-	-	-	-	-
YZMW0624	Pyrazine, 2-ethyl-3-(methylthio)-	Heterocyclic compound	C7H10N2S	72987-62-3	-	0.04	0.691508	0.669956	0.540304	0.703335	0.610871	0.606617	0.625712	0.661219	0.62246	0.633872	0.637969	0.594432	0.559054	0.583367	0.613846	0.654708	0.510578	0.536822	0.687732	0.869858	0.794448	0.682759	0.656762	0.53252	0.586105	0.589951	0.554788	0.595501	0.60527	0.529642	0.568803	0.624762	0.493056	0.608186	0.626689	0.651255
XMW0254	3,5-di-tert-Butyl-4-hydroxybenzaldehyde	Aldehyde	C15H22O2	1620-98-0	-	-	-	-	-	-	-	-	-	-	-	-	-	-	-	-	-	-	-	-	-	-	-	-	-	-	-	-	-	-	-	-	-	-	-	-	-	-
XMW0250	1-Pentanone, 1-(4-methylphenyl)-	Ketone	C12H16O	1671-77-8	-	-	-	-	-	-	-	-	-	-	-	-	-	-	-	-	-	-	-	-	-	-	-	-	-	-	-	-	-	-	-	-	-	-	-	-	-	-
YZMW0577	Benzenepropanenitrile	Nitrogen compounds	C9H9N	645-59-0	-	0.015	0.791997	0.995438	0.742635	0.539337	0.526786	0.59017	0.751091	0.713512	0.915578	0.786075	0.795421	0.639596	1.19451	0.966607	0.683665	0.619677	0.849637	1.1162	1.09375	0.609256	1.01259	1.05256	0.845294	0.697054	0.827812	1.00742	0.977581	0.911579	1.07357	1.01104	1.09948	0.837086	1.06877	0.980167	0.947767	0.996361
YZMW0579	Salicylamide	Amine	C7H7NO2	65-45-2	-	1370	1.03647e-05	1.31451e-05	1.19347e-05	1.46144e-05	1.47742e-05	1.46537e-05	1.18886e-05	1.31334e-05	1.15819e-05	1.2154e-05	1.30996e-05	1.37141e-05	1.38882e-05	1.57139e-05	1.48051e-05	1.75433e-05	1.72148e-05	1.56332e-05	1.65611e-05	1.90481e-05	3.21612e-05	1.97769e-05	2.08067e-05	1.91836e-05	2.376e-05	2.57469e-05	2.55249e-05	2.66321e-05	2.44851e-05	2.65919e-05	3.36163e-05	3.39269e-05	3.37837e-05	3.42955e-05	3.22566e-05	3.14242e-05
XMW0247	Benzene, 1-methyl-4-(1,2,2-trimethylcyclopentyl)-, (R)-	Terpenoids	C15H22	16982-00-6	-	-	-	-	-	-	-	-	-	-	-	-	-	-	-	-	-	-	-	-	-	-	-	-	-	-	-	-	-	-	-	-	-	-	-	-	-	-
XMW0246	Oxiranecarboxaldehyde, 3-methyl-3-(4-methyl-3-pentenyl)-	Aldehyde	C10H16O2	16996-12-6	-	-	-	-	-	-	-	-	-	-	-	-	-	-	-	-	-	-	-	-	-	-	-	-	-	-	-	-	-	-	-	-	-	-	-	-	-	-
YZMW0586	Cyclooctanecarboxaldehyde	Aldehyde	C9H16O	6688-11-5	-	0.4	0.127314	0.13567	0.125811	0.145004	0.144492	0.157802	0.126734	0.162282	0.134146	0.135365	0.129602	0.128724	0.116685	0.127379	0.136768	0.147961	0.0870788	0.112845	0.128356	0.120274	0.143822	0.135307	0.105675	0.143861	0.102097	0.118087	0.113084	0.109485	0.109456	0.119858	0.124464	0.120773	0.126599	0.12782	0.124792	0.122482
YZMW0592	2-Ethylhexyl methacrylate	Ester	C12H22O2	688-84-6	-	0.8	0.0320152	0.0284022	0.0253723	0.0296177	0.028713	0.0274006	0.0271053	0.0246954	0.0263476	0.02646	0.0244769	0.0273587	0.0181918	0.024506	0.0259731	0.0302133	0.0223976	0.0240094	0.0293779	0.0350053	0.0546128	0.0334455	0.0316748	0.0349223	0.0206318	0.0192934	0.0188653	0.0205596	0.0197276	0.0187629	0.0220292	0.0213953	0.0209502	0.0217848	0.0192068	0.0195862
YZMW0598	1H-Imidazole, 2-methyl-	Heterocyclic compound	C4H6N2	693-98-1	-	20	0.0208517	0.0208655	0.0220906	0.0203566	0.0204559	0.0206233	0.0201177	0.0235454	0.020202	0.0211908	0.0199969	0.0197444	0.020697	0.0209482	0.0216406	0.0216314	0.020829	0.0218332	0.0209259	0.0208564	0.0198175	0.0218159	0.0201885	0.0201741	0.0186834	0.0196421	0.0197752	0.0199462	0.0210341	0.0192896	0.017548	0.0180938	0.0166129	0.0191366	0.0189797	0.0184901
YZMW0600	Cycloheptanecarboxylic acid, 1-amino-	Acid	C8H15NO2	6949-77-5	-	143	1.088e-05	1.71914e-05	1.3274e-05	1.68836e-05	1.22258e-05	7.62295e-06	6.38259e-06	1.5265e-05	3.91141e-06	9.42203e-06	4.67023e-06	6.56285e-06	1.62575e-05	1.2208e-05	1.38064e-05	1.89971e-05	1.67434e-05	1.33713e-05	1.78584e-05	2.32057e-05	2.60124e-05	1.90377e-05	1.68719e-05	1.9623e-05	3.54206e-05	3.1406e-05	3.0226e-05	3.36063e-05	3.49763e-05	3.41402e-05	4.28296e-05	4.01974e-05	4.18896e-05	4.26841e-05	3.93676e-05	3.90708e-05
XMW0240	3-Ethyl-3-methylheptane	Hydrocarbons	C10H22	17302-01-1	-	-	-	-	-	-	-	-	-	-	-	-	-	-	-	-	-	-	-	-	-	-	-	-	-	-	-	-	-	-	-	-	-	-	-	-	-	-
XMW0239	Decane, 3-ethyl-3-methyl-	Hydrocarbons	C13H28	17312-66-2	-	-	-	-	-	-	-	-	-	-	-	-	-	-	-	-	-	-	-	-	-	-	-	-	-	-	-	-	-	-	-	-	-	-	-	-	-	-
XMW0236	Thiazole, 5-ethenyl-4-methyl-	Heterocyclic compound	C6H7NS	1759-28-0	musty, nutty, root, vegetable, cocoa	0.3	0.00133691	0.00139836	0.00129942	0.0013913	0.00141089	0.00137662	0.00627179	0.00675883	0.00769071	0.00638939	0.00712588	0.00622703	0.0139053	0.0161563	0.0141212	0.0138355	0.0165008	0.0164157	0.0179592	0.0150989	0.0196001	0.0214697	0.0204576	0.0202232	0.0201327	0.0234884	0.0217211	0.0223041	0.0212029	0.0236101	0.00135966	0.00138502	0.00142844	0.00142862	0.00147499	0.00142545
YZMW0604	Benzene, 2-chloro-5-methoxy-1,3-dimethyl-	Halogenated hydrocarbons	C9H11ClO	6981-15-3	-	0.23	0.023076	0.0229355	0.0194142	0.0215343	0.021051	0.0214236	0.00966656	0.0114429	0.00843678	0.0106785	0.00882708	0.0104275	0.0189255	0.0202998	0.0189027	0.0217331	0.0199713	0.022564	0.00961254	0.0115677	0.0146908	0.00989603	0.0105429	0.0114699	0.00762324	0.00686573	0.00790071	0.00743482	0.00748846	0.00811542	0.00909905	0.00725514	0.00830405	0.00984997	0.00853219	0.00864058
XMW0233	Benzene, 1,1'-(1,1,2,2-tetramethyl-1,2-ethanediyl)bis-	Aromatics	C18H22	1889-67-4	-	-	-	-	-	-	-	-	-	-	-	-	-	-	-	-	-	-	-	-	-	-	-	-	-	-	-	-	-	-	-	-	-	-	-	-	-	-
XMW0223	1H-Pyrrole-2,5-dione, 3-ethyl-4-methyl-	Ketone	C7H9NO2	20189-42-8	-	-	-	-	-	-	-	-	-	-	-	-	-	-	-	-	-	-	-	-	-	-	-	-	-	-	-	-	-	-	-	-	-	-	-	-	-	-
XMW0221	Heptadecane, 7-methyl-	Hydrocarbons	C18H38	20959-33-5	-	-	-	-	-	-	-	-	-	-	-	-	-	-	-	-	-	-	-	-	-	-	-	-	-	-	-	-	-	-	-	-	-	-	-	-	-	-
XMW0735	Benzenemethanol, .alpha.-2-propenyl-	Alcohol	C10H12O	936-58-3	-	-	-	-	-	-	-	-	-	-	-	-	-	-	-	-	-	-	-	-	-	-	-	-	-	-	-	-	-	-	-	-	-	-	-	-	-	-
XMW0795	3H-Indazol-3-one, 1-ethyl-1,2-dihydro-	Ketone	C9H10N2O	54385-62-5	-	-	-	-	-	-	-	-	-	-	-	-	-	-	-	-	-	-	-	-	-	-	-	-	-	-	-	-	-	-	-	-	-	-	-	-	-	-
XMW0738	Benzoic acid, 4-amino-, methyl ester	Ester	C8H9NO2	619-45-4	-	-	-	-	-	-	-	-	-	-	-	-	-	-	-	-	-	-	-	-	-	-	-	-	-	-	-	-	-	-	-	-	-	-	-	-	-	-
YC_509	Phenol, 5-ethenyl-2-methoxy-	Phenol	C9H10O2	621-58-9	-	0.00015	0.645479	0.675146	0.627379	0.671738	0.681199	0.664654	9.50084	3.23349	8.37621	8.0129	8.95624	13.7138	0.587869	0.610089	0.618101	0.605337	0.613537	0.605722	23.3299	19.8514	30.9747	22.2736	20.1459	19.172	27.5151	32.3589	28.1277	28.9437	28.5065	28.2794	22.0632	29.8399	23.5474	26.6714	24.6481	26.3321
YC_566	Phenazine	Heterocyclic compound	C12H8N2	92-82-0	-	-	-	-	-	-	-	-	-	-	-	-	-	-	-	-	-	-	-	-	-	-	-	-	-	-	-	-	-	-	-	-	-	-	-	-	-	-
XMW1346	4-Tridecanone	Ketone	C13H26O	26215-90-7	-	-	-	-	-	-	-	-	-	-	-	-	-	-	-	-	-	-	-	-	-	-	-	-	-	-	-	-	-	-	-	-	-	-	-	-	-	-
XMW1345	Octanoic acid, 3-methylbutyl ester	Ester	C13H26O2	2035-99-6	sweet, oily, fruity, green, soapy, pineapple, coconut	0.07	0.0781116	0.063895	0.04492	0.0600166	0.0553069	0.0476107	0.116229	0.091776	0.092407	0.083752	0.0964014	0.0860759	0.151795	0.172822	0.188178	0.19642	0.179903	0.181466	0.314804	0.371781	0.455302	0.325235	0.348381	0.374075	0.539721	0.576437	0.520954	0.578609	0.514861	0.540543	0.49237	0.484451	0.494433	0.507643	0.44165	0.469801
YC_715	Cyclononanone	Ketone	C9H16O	3350-30-9	-	0.098	0.485112	0.523588	0.571216	0.57276	0.664712	0.634114	0.708234	0.915149	0.782452	0.825544	0.77899	0.867848	0.414577	0.433312	0.438132	0.483456	0.515653	0.537529	0.782451	0.866409	1.18896	1.13042	1.02671	1.05844	0.918836	1.11494	1.03365	1.0263	1.05739	1.05415	0.735608	0.650422	0.692739	0.754899	0.649506	0.648355
XMW1343	1-(3-Ethoxyphenyl)acetone	Ketone	C11H14O2	23037-47-0	-	-	-	-	-	-	-	-	-	-	-	-	-	-	-	-	-	-	-	-	-	-	-	-	-	-	-	-	-	-	-	-	-	-	-	-	-	-
YC_926	Histamine	Amine	C5H9N3	51-45-6	-	70	0.000308629	0.000352917	0.000318445	0.000387125	0.000366891	0.000374135	0.000584935	0.000587177	0.000463238	0.000526612	0.000466643	0.000474437	0.000812409	0.000914867	0.00089213	0.000959031	0.000932921	0.000859444	0.00137184	0.00157832	0.00212585	0.0014137	0.00143519	0.00153161	0.00302802	0.00323911	0.00296762	0.00334859	0.00311289	0.00314138	0.00362668	0.00351104	0.00362658	0.00358637	0.00338033	0.00347227
XMW1341	Thiophene, 3-phenyl-	Heterocyclic compound	C10H8S	2404-87-7	-	-	-	-	-	-	-	-	-	-	-	-	-	-	-	-	-	-	-	-	-	-	-	-	-	-	-	-	-	-	-	-	-	-	-	-	-	-
YC_949	Phenol, 2-amino-4-methyl-	Phenol	C7H9NO	95-84-1	-	-	-	-	-	-	-	-	-	-	-	-	-	-	-	-	-	-	-	-	-	-	-	-	-	-	-	-	-	-	-	-	-	-	-	-	-	-
XMW1340	Thieno[2,3-b]thiophene,2-methyl-	Heterocyclic compound	C7H6S2	13393-75-4	-	-	-	-	-	-	-	-	-	-	-	-	-	-	-	-	-	-	-	-	-	-	-	-	-	-	-	-	-	-	-	-	-	-	-	-	-	-
YC_988	2-Hexanol, 5-methyl-	Alcohol	C7H16O	627-59-8	-	0.33	0.0198326	0.0187663	0.0151382	0.0183079	0.0162661	0.0182947	0.0187103	0.0206799	0.0173439	0.0199122	0.0201455	0.0173456	0.0164665	0.0157667	0.0111109	0.0107194	0.0125899	0.0144711	0.0181572	0.0113635	0.0137348	0.0144322	0.0116997	0.0136807	0.0120243	0.0128047	0.0144464	0.0114466	0.0147919	0.0134624	0.0207387	0.0216335	0.0172857	0.0210946	0.0206058	0.0213189
YZMW0001	Phenol, 4-nitro-	Phenol	C6H5NO3	100-02-7	-	2.3	0.00318253	0.0034325	0.00327029	0.00451619	0.00424527	0.00464781	0.003411	0.00325419	0.00279903	0.00279276	0.00314662	0.00322255	0.00292904	0.00496484	0.00833422	0.00599435	0.00287025	0.00556665	0.00461309	0.00692355	0.0106975	0.0074848	0.00717595	0.00685932	0.0209296	0.0160714	0.0219088	0.0159071	0.0162254	0.0219313	0.0287814	0.0275657	0.0294098	0.0290966	0.0253571	0.0276933
XMW1337	Nonane, 3-methyl-5-propyl-	Hydrocarbons	C13H28	31081-18-2	-	-	-	-	-	-	-	-	-	-	-	-	-	-	-	-	-	-	-	-	-	-	-	-	-	-	-	-	-	-	-	-	-	-	-	-	-	-
XMW1336	N-Benzyloxy-2-carbomethoxyaziridine	Heterocyclic compound	C11H13NO3	53084-33-6	-	-	-	-	-	-	-	-	-	-	-	-	-	-	-	-	-	-	-	-	-	-	-	-	-	-	-	-	-	-	-	-	-	-	-	-	-	-
YZMW0002	Terephthalic acid	Acid	C8H6O4	100-21-0	-	6640	8.02499e-05	9.55003e-05	9.00901e-05	0.000110426	0.000100161	0.000108983	8.02115e-05	9.86674e-05	7.81212e-05	8.19374e-05	8.18482e-05	8.96097e-05	8.29329e-05	8.40798e-05	0.000100328	0.000110673	8.74745e-05	8.47357e-05	7.89901e-05	9.87342e-05	0.000118292	7.94987e-05	8.83774e-05	9.65565e-05	3.9524e-05	4.05724e-05	3.82033e-05	4.69096e-05	4.33179e-05	3.89469e-05	3.64651e-05	3.64644e-05	3.93439e-05	3.91256e-05	3.98655e-05	3.84073e-05
XMW1334	Benzene, (2,2-diethoxyethyl)-	Ether	C12H18O2	6314-97-2	-	13.1864	0.000283247	0.000279852	0.000265919	0.000268579	0.000269783	0.000231124	3.57976e-05	3.89546e-05	3.60344e-05	3.6665e-05	3.56675e-05	3.622e-05	0.000427108	0.000280397	0.000321957	0.000420198	0.000381967	0.000413139	3.86469e-05	3.86046e-05	3.99092e-05	4.33827e-05	4.25176e-05	4.39235e-05	0.00091102	0.000886102	0.000904363	0.000921389	0.000903376	0.000888317	0.000954713	0.000985325	0.00101797	0.000954287	0.000962773	0.00105624
XMW1328	2(1H)-Naphthalenone, 3,4,4a,5,6,7-hexahydro-1,1,4a-trimethyl-	Ketone	C13H20O	4668-61-5	-	-	-	-	-	-	-	-	-	-	-	-	-	-	-	-	-	-	-	-	-	-	-	-	-	-	-	-	-	-	-	-	-	-	-	-	-	-
YZMW0007	Urea, N-methyl-N'-phenyl-	Nitrogen compounds	C8H10N2O	1007-36-9	-	450	1.16504e-07	1.21859e-07	1.13237e-07	1.21244e-07	1.22951e-07	1.19965e-07	8.01324e-07	1.16724e-07	1.07974e-07	8.45548e-07	9.13953e-07	5.4265e-07	1.06106e-07	1.10116e-07	1.11563e-07	1.09259e-07	1.10739e-07	1.09328e-07	1.15802e-07	1.15675e-07	1.19584e-07	1.29993e-07	1.27401e-07	1.31613e-07	4.45991e-06	4.10268e-06	4.20854e-06	4.89338e-06	5.13853e-06	4.25778e-06	7.67342e-06	7.29564e-06	5.8117e-06	7.03252e-06	5.51973e-06	6.96186e-06
YC_382	Phenanthrene	Aromatics	C14H10	85-01-8	-	1	0.0276985	0.041849	0.0338329	0.0462519	0.0456497	0.0435015	0.04231	0.0467448	0.035465	0.0385629	0.0407125	0.0412486	0.051955	0.0536089	0.0640731	0.073211	0.0556637	0.0547981	0.064453	0.0896262	0.128331	0.072404	0.0798259	0.0947024	0.0465668	0.0482287	0.042591	0.0580491	0.0503724	0.0476804	0.0430985	0.0386352	0.0435545	0.0426723	0.0418971	0.0427746
XMW1348	2-Tridecanone	Ketone	C13H26O	593-08-8	fatty, waxy, dairy, milky, coconut, nutty, herbal, earthy	0.5	0.0810128	0.0903408	0.0851291	0.0967413	0.0926638	0.0893075	0.0761429	0.0818658	0.0537671	0.0541904	0.0539258	0.0796052	0.0981596	0.100582	0.109331	0.115928	0.101294	0.0992632	0.105796	0.120644	0.163641	0.111452	0.0935059	0.119719	0.0955759	0.104924	0.104017	0.1096	0.0749556	0.102534	0.101538	0.096725	0.106254	0.108975	0.102771	0.102743
YC_215	1,4-Benzenediol, 2-methyl-	Phenol	C7H8O2	95-71-6	-	1240	1.72349e-05	1.73664e-05	1.48509e-05	2.15949e-05	1.80938e-05	1.5726e-05	1.59721e-05	1.76662e-05	1.51479e-05	1.61504e-05	1.50077e-05	1.47467e-05	1.4361e-05	1.53848e-05	1.52756e-05	1.93819e-05	1.40803e-05	1.50743e-05	1.64151e-05	2.09006e-05	2.38221e-05	1.75205e-05	1.71338e-05	1.85236e-05	1.90909e-05	2.14244e-05	1.95996e-05	2.12218e-05	2.05508e-05	2.02913e-05	1.89006e-05	1.9255e-05	1.56779e-05	1.86579e-05	1.8009e-05	1.66264e-05
XMW1393	1-Undecyne	Hydrocarbons	C11H20	2243-98-3	-	110	0.000692144	0.000705519	0.000704689	0.000695403	0.000681925	0.000684156	0.000696425	0.000797435	0.000724242	0.000741923	0.000689339	0.000703286	0.000660422	0.000671078	0.000673699	0.000661722	0.000662275	0.000693818	0.000652213	0.000624804	0.000692105	0.000705319	0.000638205	0.000654733	0.000571144	0.000611698	0.000615806	0.00060433	0.000634447	0.000593668	0.00055989	0.00057662	0.000564078	0.000629618	0.000619876	0.000614049
XMW3775	Benzo[b]thiophene	Heterocyclic compound	C8H6S	95-15-8	solvent, rubbery, earthy	0.065	0.192797	0.167656	0.155666	0.161334	0.208463	0.170674	0.169681	0.171668	0.169142	0.167511	0.20213	0.177861	0.0798691	0.183787	0.211928	0.164882	0.138943	0.0967301	0.0931529	0.155191	0.121165	0.145278	0.197579	0.214911	0.23955	0.289591	0.222165	0.208503	0.262229	0.25342	0.156253	0.195399	0.134695	0.0947047	0.197188	0.17341
YC_1012	4-(4-Methylpent-3-enyl)-3,6-dihydro-1,2-dithiin	Heterocyclic compound	C10H16S2	73188-23-5	-	0.01	49.5713	59.1305	55.3827	68.0013	61.8948	67.63	49.678	60.0667	48.5841	50.156	50.3941	55.0563	50.4986	51.2563	60.7528	67.1184	53.6534	52.0242	49.5195	61.568	75.4791	51.5652	56.783	61.0321	26.1877	26.2747	25.6344	31.7105	29.237	26.0392	24.4031	23.5788	26.1042	24.9217	26.1275	25.0447
YC_1252	Cyclohexanol, 2-(1,1-dimethylethyl)-	Alcohol	C10H20O	13491-79-7	-	0.11	0.0510759	0.0598772	0.056569	0.0363822	0.0717736	0.0779319	0.0423329	0.0685171	0.0432011	0.0438966	0.0442173	0.0399222	0.00459276	0.0414042	0.0241447	0.00472923	0.0545125	0.0735177	0.0409352	0.00500697	0.0560846	0.0525076	0.292949	0.00569683	0.0395142	0.0466216	0.0526438	0.0449729	0.0434033	0.0475831	0.0680072	0.0657486	0.0698119	0.0682932	0.0841965	0.0744061
XMW1399	Decane, 2,5,9-trimethyl-	Hydrocarbons	C13H28	62108-22-9	-	-	-	-	-	-	-	-	-	-	-	-	-	-	-	-	-	-	-	-	-	-	-	-	-	-	-	-	-	-	-	-	-	-	-	-	-	-
XMW1398	Methyl 5-hydroxynicotinate	Ester	C7H7NO3	30766-22-4	-	-	-	-	-	-	-	-	-	-	-	-	-	-	-	-	-	-	-	-	-	-	-	-	-	-	-	-	-	-	-	-	-	-	-	-	-	-
XMW1396	2,6-Dimethoxyamphetamine	Amine	C11H17NO2	23690-14-4	-	-	-	-	-	-	-	-	-	-	-	-	-	-	-	-	-	-	-	-	-	-	-	-	-	-	-	-	-	-	-	-	-	-	-	-	-	-
YC_1273	Phenol, o-amino-	Phenol	C6H7NO	95-55-6	-	-	-	-	-	-	-	-	-	-	-	-	-	-	-	-	-	-	-	-	-	-	-	-	-	-	-	-	-	-	-	-	-	-	-	-	-	-
XMW1395	1H-Indene, 3-methyl-	Aromatics	C10H10	767-60-2	-	-	-	-	-	-	-	-	-	-	-	-	-	-	-	-	-	-	-	-	-	-	-	-	-	-	-	-	-	-	-	-	-	-	-	-	-	-
XMW1385	3-Imidazol-1-ylpropanenitrile	Heterocyclic compound	C6H7N3	23996-53-4	-	-	-	-	-	-	-	-	-	-	-	-	-	-	-	-	-	-	-	-	-	-	-	-	-	-	-	-	-	-	-	-	-	-	-	-	-	-
YC_1861	1-Butanol, 2-methyl-, propanoate	Ester	C8H16O2	2438-20-2	-	0.028	5.01713	4.00707	3.84723	3.82754	3.97746	3.96514	2.46821	2.54578	2.62474	2.68614	3.08641	2.27242	3.82706	3.8289	3.7276	4.00039	4.00418	4.28366	3.33263	3.14798	3.40802	3.50044	3.31025	3.44219	2.67902	3.49698	4.06935	3.59217	2.7698	3.92943	3.26607	3.77942	3.15981	3.69168	4.56478	4.05987
YC_1313	Pentanedioic acid, diethyl ester	Ester	C9H16O4	818-38-2	-	5	0.00416639	0.00470082	0.00394377	0.00512824	0.00476824	0.00451957	0.00521435	0.00556108	0.0048203	0.00483198	0.00486649	0.00489935	0.00355114	0.00351116	0.00461536	0.00520151	0.00331933	0.00358282	0.00424016	0.00477079	0.00559058	0.00450522	0.00431388	0.00448686	0.00301148	0.00349179	0.00342259	0.00317437	0.00323883	0.00340361	0.00338071	0.00348589	0.0038433	0.00384812	0.00379436	0.00373187
XMW1378	4,6-Octadiyn-3-one, 2-methyl-	Ketone	C9H10O	29743-33-7	-	-	-	-	-	-	-	-	-	-	-	-	-	-	-	-	-	-	-	-	-	-	-	-	-	-	-	-	-	-	-	-	-	-	-	-	-	-
XMW1372	(Z)-Ethyl heptadec-9-enoate	Ester	C19H36O2	1089325-29-0	-	-	-	-	-	-	-	-	-	-	-	-	-	-	-	-	-	-	-	-	-	-	-	-	-	-	-	-	-	-	-	-	-	-	-	-	-	-
XMW1362	Oxirane, heptadecyl-	Heterocyclic compound	C19H38O	67860-04-2	-	-	-	-	-	-	-	-	-	-	-	-	-	-	-	-	-	-	-	-	-	-	-	-	-	-	-	-	-	-	-	-	-	-	-	-	-	-
XMW1361	2-Pentadecanone	Ketone	C15H30O	2345-28-0	fresh, jasmin, celery	-	-	-	-	-	-	-	-	-	-	-	-	-	-	-	-	-	-	-	-	-	-	-	-	-	-	-	-	-	-	-	-	-	-	-	-	-
XMW1355	Hexanoic acid, 2-ethyl-, octyl ester	Ester	C16H32O2	93777-45-8	-	-	-	-	-	-	-	-	-	-	-	-	-	-	-	-	-	-	-	-	-	-	-	-	-	-	-	-	-	-	-	-	-	-	-	-	-	-
XMW1354	cis-5-Dodecenoic acid	Acid	C12H22O2	2430-94-6	-	-	-	-	-	-	-	-	-	-	-	-	-	-	-	-	-	-	-	-	-	-	-	-	-	-	-	-	-	-	-	-	-	-	-	-	-	-
YC_1825	Piperidine, 1-ethyl-	Heterocyclic compound	C7H15N	766-09-6	-	230	0.0011244	0.00128434	0.00106512	0.00115686	0.00116712	0.0011376	0.00105969	0.00112142	0.00103467	0.00109789	0.00119921	0.00105158	0.00104582	0.00116561	0.00106048	0.00104749	0.00107575	0.00103256	0.00110482	0.00109942	0.00116357	0.0012191	0.00120065	0.00127866	0.00111946	0.00123946	0.00116153	0.0012009	0.00121543	0.00121239	0.00105184	0.00117375	0.00122985	0.00108298	0.00118197	0.00109684
XMW1327	Propanal, dipropylhydrazone	Amine	C9H20N2	34687-35-9	-	-	-	-	-	-	-	-	-	-	-	-	-	-	-	-	-	-	-	-	-	-	-	-	-	-	-	-	-	-	-	-	-	-	-	-	-	-
XMW1324	Benzeneacetaldehyde, .alpha.-ethylidene-	Aldehyde	C10H10O	4411-89-6	sweet, narcissus, cortex, beany, honey, cocoa, nutty, radish	0.5	0.17256	0.205288	0.175617	0.210455	0.176805	0.180397	0.149452	0.169157	0.144052	0.14934	0.116385	0.167133	0.144081	0.0914639	0.104789	0.146285	0.105297	0.156568	0.0843633	0.116048	0.118589	0.0900741	0.0796566	0.147998	0.0266373	0.0249085	0.0393102	0.0237448	0.025951	0.023051	0.0227132	0.0338393	0.0584602	0.0327678	0.0330762	0.0342973
XMW1197	Propanoic acid, 2-methylpropyl ester	Ester	C7H14O2	540-42-1	fruity, green, ether, sweet, tutti-frutti, banana	0.11	1.07683	0.971126	0.861062	0.992538	0.981182	0.946709	0.630877	0.604782	0.610997	0.659895	0.507584	0.672802	0.386465	0.370245	0.358175	0.484749	0.367197	0.424912	0.815419	0.987243	1.38801	0.875703	1.14945	0.936481	1.87403	1.78778	1.64659	1.62825	1.39665	1.68868	1.05764	0.978754	0.914962	0.949418	0.967003	0.914388
YZMW0010	2-Dodecanol	Alcohol	C12H26O	10203-28-8	-	0.041	2.74319	3.24379	2.98405	3.28213	3.32205	3.3618	2.87638	3.17981	2.78759	2.97177	2.81953	2.86818	2.95575	3.13058	3.25494	3.61224	3.21992	3.11033	3.16918	3.52677	4.91212	3.50996	3.47927	3.71827	3.5581	3.8878	3.72031	4.23475	3.94839	3.70429	3.57643	3.52812	3.58525	3.64951	3.45045	3.58191
XMW1253	Butanoic acid, 1-methyloctyl ester	Ester	C13H26O2	69727-42-0	-	-	-	-	-	-	-	-	-	-	-	-	-	-	-	-	-	-	-	-	-	-	-	-	-	-	-	-	-	-	-	-	-	-	-	-	-	-
YZMW0055	Bis(2-chloroethyl) ether	Ether	C4H8Cl2O	111-44-4	-	0.36	0.0662862	0.0649979	0.0610321	0.012594	0.0528437	0.0242565	0.0585426	0.0573633	0.063192	0.0608922	0.0595976	0.0587688	0.0657414	0.0721154	0.0495722	0.0251603	0.0453037	0.0643567	0.0644684	0.0221664	0.0485922	0.0659717	0.0596351	0.027845	0.0625026	0.0706182	0.0672396	0.0678783	0.0673478	0.0713325	0.0540383	0.0572448	0.0509054	0.0570419	0.060503	0.0585581
XMW1252	2(1H)-Naphthalenone, 3,4,5,6,7,8-hexahydro-	Ketone	C10H14O	13837-12-2	-	-	-	-	-	-	-	-	-	-	-	-	-	-	-	-	-	-	-	-	-	-	-	-	-	-	-	-	-	-	-	-	-	-	-	-	-	-
XMW1246	2-Butenoic acid, hexyl ester	Ester	C10H18O2	19089-92-0	sweet, caramel, green, walnut, oily, radish	-	-	-	-	-	-	-	-	-	-	-	-	-	-	-	-	-	-	-	-	-	-	-	-	-	-	-	-	-	-	-	-	-	-	-	-	-
XMW1243	Methyl 6-chloronicotinate	Ester	C7H6ClNO2	73781-91-6	-	-	-	-	-	-	-	-	-	-	-	-	-	-	-	-	-	-	-	-	-	-	-	-	-	-	-	-	-	-	-	-	-	-	-	-	-	-
XMW1235	N,N-Dimethylhexanamide	Amine	C8H17NO	5830-30-8	-	-	-	-	-	-	-	-	-	-	-	-	-	-	-	-	-	-	-	-	-	-	-	-	-	-	-	-	-	-	-	-	-	-	-	-	-	-
XMW1234	Propanoic acid, 2-acetylhydrazono-	Acid	C5H8N2O3	64096-81-7	-	-	-	-	-	-	-	-	-	-	-	-	-	-	-	-	-	-	-	-	-	-	-	-	-	-	-	-	-	-	-	-	-	-	-	-	-	-
XMW1233	3-Cyclopentyl-1-propanol	Alcohol	C8H16O	767-05-5	-	-	-	-	-	-	-	-	-	-	-	-	-	-	-	-	-	-	-	-	-	-	-	-	-	-	-	-	-	-	-	-	-	-	-	-	-	-
XMW1227	(E)-2-Methylbut-2-en-1-yl methacrylate	Ester	C9H14O2	88142-95-4	-	-	-	-	-	-	-	-	-	-	-	-	-	-	-	-	-	-	-	-	-	-	-	-	-	-	-	-	-	-	-	-	-	-	-	-	-	-
XMW1226	Hexanoic acid, 2-methylpropyl ester	Ester	C10H20O2	105-79-3	fruity, pineapple, green, apple skin, sour, tropical, peach, earthy	5.25	0.000210627	0.000220308	0.000204721	0.000219196	0.000222283	0.000216884	0.00382366	0.00398901	0.00411678	0.00412464	0.00380042	0.00373787	0.00205874	0.00248055	0.00209821	0.00206912	0.00222726	0.00240237	0.0022957	0.00227503	0.00254715	0.00281446	0.002399	0.00229592	0.00108169	0.00124385	0.00132659	0.00117275	0.00114315	0.00130697	0.00195031	0.00143605	0.00144947	0.00166081	0.00160758	0.00162354
YZMW0080	3-tert-Butyl-4-hydroxyanisole	Ether	C11H16O2	121-00-6	-	3	0.0131567	0.0146333	0.0122266	0.0151869	0.0140042	0.0136851	0.0134805	0.0150319	0.0123781	0.0137164	0.0128059	0.0142879	0.0107784	0.011279	0.0119292	0.0129124	0.0116112	0.0122127	0.0129839	0.0150326	0.0208923	0.0132113	0.0145063	0.0180916	0.0103458	0.0115554	0.0104287	0.0121611	0.0111221	0.0115095	0.00840405	0.0085023	0.0226114	0.00851449	0.00650739	0.00808477
XMW1212	2-Furancarboxylic acid, ethyl ester	Ester	C7H8O3	614-99-3	ethyl, benzoate, fruity, floral	16	0.00201094	0.00205404	0.00208946	0.0020276	0.00195329	0.00195546	0.000833842	0.000958112	0.00077145	0.000818325	0.000735047	0.00080593	0.0017776	0.00158926	0.0017058	0.00185704	0.0019271	0.00181254	0.000821196	0.000837257	0.00100729	0.000902637	0.00101284	0.000920932	0.000814849	0.000829428	0.00084679	0.000850425	0.00100189	0.000902	0.00119609	0.000996764	0.00113436	0.0013146	0.0013528	0.00129532
YZMW0083	Propyl gallate	Ester	C10H12O5	121-79-9	-	320	4.19997e-05	5.06765e-05	3.97716e-05	4.29507e-05	4.0743e-05	3.79518e-05	5.46964e-05	4.70203e-05	4.38123e-05	4.65234e-05	3.81909e-05	3.65856e-05	4.32669e-05	4.72873e-05	4.88959e-05	4.02614e-05	3.86479e-05	5.06372e-05	4.28226e-05	3.77623e-05	4.98345e-05	4.59845e-05	4.88979e-05	5.58005e-05	8.27455e-05	5.70067e-05	6.23954e-05	7.78379e-05	8.04927e-05	7.29838e-05	5.77743e-05	6.90733e-05	4.82309e-05	5.77893e-05	6.08299e-05	5.73017e-05
XMW1209	Propanoic acid, 2-methyl-, 2-methylbutyl ester	Ester	C9H18O2	2445-69-4	fruity, ethereal, tropical, banana	0.014	5.04313	5.43078	4.81421	5.31111	5.24607	4.99423	4.58043	4.54451	4.4387	4.70473	4.70811	4.53023	4.57586	5.13061	5.12348	4.19221	4.93958	4.47407	4.74759	4.74266	4.62034	5.43671	5.46486	5.28116	4.3029	5.02872	5.18333	5.23515	4.29079	5.03119	4.73129	5.25989	5.4694	5.3711	5.6286	5.01235
XMW1208	1H-Tetrazole	Heterocyclic compound	CH2N4	288-94-8	-	-	-	-	-	-	-	-	-	-	-	-	-	-	-	-	-	-	-	-	-	-	-	-	-	-	-	-	-	-	-	-	-	-	-	-	-	-
XMW1207	Propanedioic acid, amino-, diethyl ester	Ester	C7H13NO4	6829-40-9	-	-	-	-	-	-	-	-	-	-	-	-	-	-	-	-	-	-	-	-	-	-	-	-	-	-	-	-	-	-	-	-	-	-	-	-	-	-
YZMW0085	Benzoic acid, 3-nitro-	Acid	C7H5NO4	121-92-6	-	134	0.00492118	0.00577696	0.00535979	0.00640912	0.00596185	0.00623605	0.00492352	0.00567609	0.00478287	0.00492227	0.00495994	0.00526346	0.00494301	0.00503794	0.00577153	0.00629573	0.00533753	0.00512888	0.00451594	0.00563432	0.00699264	0.00483039	0.00509698	0.00549333	0.0022507	0.00230403	0.00219971	0.00262173	0.00245674	0.0022204	0.00219497	0.00215568	0.00235797	0.00231468	0.0023314	0.00228344
YZMW0054	Ethanol, 2-[(2-aminoethyl)amino]-	Alcohol	C4H12N2O	111-41-1	-	2.8	0.0335696	0.0343869	0.0332841	0.0364164	0.0357318	0.0352103	0.03062	0.0360155	0.02954	0.0313778	0.029802	0.0313648	0.020346	0.0239876	0.0263679	0.0278687	0.025812	0.0235688	0.0254077	0.0263239	0.0280849	0.0289932	0.027608	0.0274883	0.0197883	0.0214397	0.0230612	0.0218166	0.0215861	0.0207206	0.0314829	0.0301064	0.0297271	0.0340139	0.0347018	0.0336809
XMW1256	2-Butanone, 4-(2,6,6-trimethyl-1,3-cyclohexadien-1-yl)-	Ketone	C13H20O	20483-36-7	floral	-	-	-	-	-	-	-	-	-	-	-	-	-	-	-	-	-	-	-	-	-	-	-	-	-	-	-	-	-	-	-	-	-	-	-	-	-
XMW1311	2-Propenal, 3-(2-furanyl)-	Aldehyde	C7H6O2	623-30-3	green, grassy, fruity, spicy, vanilla, nutty, woody, cinnamon	13.128	0.0370031	0.0409041	0.0381865	0.0402851	0.042948	0.0406682	0.0339384	0.0408632	0.0343427	0.0348364	0.033819	0.0342597	0.0387755	0.0403409	0.040432	0.0418976	0.0418589	0.0419849	0.0352015	0.0347495	0.0393694	0.0385687	0.0372667	0.0374583	0.0197224	0.0238182	0.0224387	0.0226423	0.0218778	0.0227559	0.0245645	0.0226302	0.0229571	0.0253363	0.0244234	0.0240242
XMW1321	Furan, 2-(1,2-diethoxyethyl)-	Heterocyclic compound	C10H16O3	14133-54-1	-	-	-	-	-	-	-	-	-	-	-	-	-	-	-	-	-	-	-	-	-	-	-	-	-	-	-	-	-	-	-	-	-	-	-	-	-	-
YZMW0015	Triethanolamine	Alcohol	C6H15NO3	102-71-6	-	160	3.02808e-05	3.97559e-05	3.48192e-05	4.77148e-05	4.59596e-05	4.47217e-05	2.91387e-05	4.31575e-05	3.58801e-05	3.62253e-05	3.38022e-05	3.94206e-05	3.47711e-05	2.8843e-05	3.9858e-05	4.46408e-05	3.74786e-05	3.65027e-05	3.72407e-05	4.73497e-05	5.3592e-05	3.79746e-05	3.92889e-05	4.3749e-05	2.9649e-05	3.46858e-05	3.41046e-05	3.60307e-05	3.21273e-05	3.40692e-05	4.65802e-05	4.02264e-05	5.35697e-05	5.24428e-05	4.66779e-05	4.2122e-05
YZMW0028	1,2,3-Propanetriol, 1-acetate	Ester	C5H10O4	106-61-6	-	1340	1.76056e-05	1.90454e-05	1.82943e-05	1.65546e-05	1.73817e-05	1.69129e-05	1.91108e-05	2.18915e-05	1.82865e-05	1.84139e-05	1.96819e-05	2.0259e-05	1.76848e-05	2.03916e-05	1.76965e-05	2.05284e-05	1.69179e-05	1.81895e-05	1.68916e-05	1.72965e-05	1.76027e-05	1.72143e-05	1.72107e-05	1.94721e-05	1.68448e-05	1.79587e-05	1.73245e-05	1.8614e-05	1.78522e-05	1.67446e-05	1.62197e-05	1.72313e-05	1.57061e-05	1.59051e-05	1.59758e-05	1.67267e-05
XMW1317	8-Azabicyclo[3.2.1]octane, 3-chloro-8-methyl-	Heterocyclic compound	C8H14ClN	51275-31-1	-	-	-	-	-	-	-	-	-	-	-	-	-	-	-	-	-	-	-	-	-	-	-	-	-	-	-	-	-	-	-	-	-	-	-	-	-	-
XMW1316	4-Methoxyformanilide	Amine	C8H9NO2	5470-34-8	-	-	-	-	-	-	-	-	-	-	-	-	-	-	-	-	-	-	-	-	-	-	-	-	-	-	-	-	-	-	-	-	-	-	-	-	-	-
XMW1315	Undecane, 4-methyl-	Hydrocarbons	C12H26	2980-69-0	-	-	-	-	-	-	-	-	-	-	-	-	-	-	-	-	-	-	-	-	-	-	-	-	-	-	-	-	-	-	-	-	-	-	-	-	-	-
YZMW0034	Phenol, 4-(methylthio)-	Phenol	C7H8OS	1073-72-9	-	0.8	0.111901	0.112764	0.101475	0.109533	0.109202	0.106774	0.103287	0.110335	0.0846654	0.0914215	0.0858092	0.0955307	0.0882493	0.09531	0.0961099	0.116325	0.0964914	0.105074	0.104402	0.119287	0.176628	0.111358	0.116262	0.119294	0.110404	0.112247	0.102918	0.120674	0.113584	0.106843	0.101786	0.106114	0.109231	0.100371	0.0962567	0.100943
YZMW0036	L-Tyrosine, methyl ester	Ester	C10H13NO3	1080-06-4	-	27900	3.3051e-07	4.47113e-07	4.21339e-07	5.31412e-07	4.68599e-07	5.00381e-07	4.27927e-07	5.11897e-07	3.95565e-07	4.27899e-07	4.20754e-07	4.75192e-07	6.35614e-07	5.43529e-07	6.94966e-07	9.10532e-07	7.34309e-07	6.24067e-07	8.06628e-07	1.07359e-06	1.48304e-06	8.71833e-07	9.8857e-07	1.12781e-06	6.00211e-07	6.03048e-07	5.54183e-07	7.42156e-07	6.58729e-07	5.97002e-07	5.82674e-07	5.44027e-07	5.66129e-07	5.84628e-07	5.79112e-07	5.56573e-07
XMW1258	Acetic acid, (4,6,8,9-tetramethyl-3-oxabicyclo[3.3.1]non-6-en-1-yl)methyl ester	Ester	C15H24O3	309722-81-4	-	-	-	-	-	-	-	-	-	-	-	-	-	-	-	-	-	-	-	-	-	-	-	-	-	-	-	-	-	-	-	-	-	-	-	-	-	-
XMW1286	1H-Imidazole-4-methanol	Alcohol	C4H6N2O	822-55-9	-	-	-	-	-	-	-	-	-	-	-	-	-	-	-	-	-	-	-	-	-	-	-	-	-	-	-	-	-	-	-	-	-	-	-	-	-	-
YZMW0040	1,3-Phenylenediamine	Amine	C6H8N2	108-45-2	-	10800	1.40799e-06	1.67699e-06	1.86624e-06	1.87912e-06	2.01227e-06	1.86695e-06	1.24247e-06	2.05032e-06	1.84371e-06	1.47885e-06	1.53953e-06	1.75141e-06	1.27166e-06	1.7009e-06	1.81892e-06	1.94518e-06	1.70273e-06	1.48298e-06	9.49217e-07	1.60124e-06	1.59663e-06	1.04763e-06	1.50251e-06	1.9302e-06	1.34547e-06	1.4358e-06	1.42941e-06	1.51754e-06	1.44087e-06	1.51366e-06	1.55638e-06	1.76163e-06	1.85894e-06	1.45329e-06	1.99545e-06	1.69271e-06
XMW1275	Thiophene, 2-dodecyl-	Heterocyclic compound	C16H28S	4861-61-4	-	-	-	-	-	-	-	-	-	-	-	-	-	-	-	-	-	-	-	-	-	-	-	-	-	-	-	-	-	-	-	-	-	-	-	-	-	-
XMW1269	L-Aspartic acid, N-acetyl-, dimethyl ester	Ester	C8H13NO5	57289-64-2	-	-	-	-	-	-	-	-	-	-	-	-	-	-	-	-	-	-	-	-	-	-	-	-	-	-	-	-	-	-	-	-	-	-	-	-	-	-
XMW1268	2-Furancarboxylic acid, tetrahydro-3-methyl-5-oxo-	Acid	C6H8O4	22073-04-7	-	-	-	-	-	-	-	-	-	-	-	-	-	-	-	-	-	-	-	-	-	-	-	-	-	-	-	-	-	-	-	-	-	-	-	-	-	-
XMW1264	Acetic acid, 1-methyl-3-(2,6,6-trimethylcyclohex-1-enyl)propyl ester	Ester	C15H26O2	86756-12-9	-	-	-	-	-	-	-	-	-	-	-	-	-	-	-	-	-	-	-	-	-	-	-	-	-	-	-	-	-	-	-	-	-	-	-	-	-	-
YZMW0042	2-Pyrimidinamine	Amine	C4H5N3	109-12-6	-	3800	3.99758e-06	4.3277e-06	4.66366e-06	3.87672e-06	4.15985e-06	3.93375e-06	3.56289e-06	4.12747e-06	4.31113e-06	4.38452e-06	4.56732e-06	3.68222e-06	2.96816e-06	3.12623e-06	2.73336e-06	2.87747e-06	3.4046e-06	2.91448e-06	3.5538e-06	3.08684e-06	3.5371e-06	3.22236e-06	3.35364e-06	2.96721e-06	1.6374e-06	1.95766e-06	1.78375e-06	1.82931e-06	1.53951e-06	1.61557e-06	2.3475e-06	1.88343e-06	2.28779e-06	2.12507e-06	1.94232e-06	2.6898e-06
XMW1260	1-Cyclohexene-1-propanol, .alpha.,2,6,6-tetramethyl-	Alcohol	C13H24O	3293-47-8	woody, floral, amber	-	-	-	-	-	-	-	-	-	-	-	-	-	-	-	-	-	-	-	-	-	-	-	-	-	-	-	-	-	-	-	-	-	-	-	-	-
XMW3772	1,3-Benzodioxole, 5-propyl-	Heterocyclic compound	C10H12O2	94-58-6	spicy, sassafrass	-	-	-	-	-	-	-	-	-	-	-	-	-	-	-	-	-	-	-	-	-	-	-	-	-	-	-	-	-	-	-	-	-	-	-	-	-
XMW1405	Acenaphthene	Aromatics	C12H10	83-32-9	-	0.08	0.151733	0.153631	0.176675	0.168573	0.201133	0.207031	0.163036	0.154381	0.132144	0.158734	0.126272	0.141315	0.158129	0.144072	0.212859	0.189458	0.207109	0.194843	0.198521	0.822326	0.292661	0.200388	0.238943	0.23669	0.289443	0.314881	0.289513	0.314984	0.298439	0.31658	0.378794	0.376663	0.418282	0.353297	0.358572	0.364827
XMW3771	1,3-Benzodioxole-5-carboxylic acid	Acid	C8H6O4	94-53-1	-	-	-	-	-	-	-	-	-	-	-	-	-	-	-	-	-	-	-	-	-	-	-	-	-	-	-	-	-	-	-	-	-	-	-	-	-	-
XMW1408	1H-Cyclopropa[a]naphthalene, 1a,2,3,3a,4,5,6,7b-octahydro-1,1,3a,7-tetramethyl-, [1aR-(1a.alpha.,3a.alpha.,7b.alpha.)]-	Terpenoids	C15H24	489-29-2	-	-	-	-	-	-	-	-	-	-	-	-	-	-	-	-	-	-	-	-	-	-	-	-	-	-	-	-	-	-	-	-	-	-	-	-	-	-
XMW2439	Pyridine, 3-(2-methylpropyl)-	Heterocyclic compound	C9H13N	14159-61-6	strong, aromatic	-	-	-	-	-	-	-	-	-	-	-	-	-	-	-	-	-	-	-	-	-	-	-	-	-	-	-	-	-	-	-	-	-	-	-	-	-
XMW3195	Heptanoic acid, butyl ester	Ester	C11H22O2	5454-28-4	green, fruity, licorice, grassy, oily, winey, starfruit, pear, tropical	-	-	-	-	-	-	-	-	-	-	-	-	-	-	-	-	-	-	-	-	-	-	-	-	-	-	-	-	-	-	-	-	-	-	-	-	-
XMW3233	Urea, 2-propenyl-	Nitrogen compounds	C4H8N2O	557-11-9	-	67	0.00059199	0.000586794	0.000505859	0.000490193	0.000460644	0.000442992	0.00053395	0.000493185	0.000465227	0.000551757	0.000554915	0.000531598	0.000420527	0.000521544	0.000476942	0.000455517	0.00041158	0.000439698	0.000453759	0.000436936	0.000496954	0.000471502	0.000414543	0.00044642	0.000545055	0.000484338	0.000449766	0.000452933	0.000588424	0.00045436	0.000506581	0.000566449	0.000508118	0.00054665	0.000543998	0.000521107
XMW2412	Furan, 2-(methoxymethyl)-	Heterocyclic compound	C6H8O2	13679-46-4	roasted, coffee	-	-	-	-	-	-	-	-	-	-	-	-	-	-	-	-	-	-	-	-	-	-	-	-	-	-	-	-	-	-	-	-	-	-	-	-	-
XMW2368	Propanoic acid, anhydride	Acid	C6H10O3	123-62-6	acetaldehyde	3.4	0.00312559	0.00294757	0.00274156	0.0028153	0.00340017	0.00316976	0.00382411	0.00350711	0.00420155	0.0036346	0.004088	0.00393469	0.00208502	0.00269028	0.00236237	0.00201549	0.00242476	0.00235474	0.00294573	0.00257372	0.00332384	0.00336851	0.000744604	0.00333533	0.00209973	0.00235619	0.00206698	0.00221427	0.00189725	0.00425254	0.00477732	0.00398578	0.00293555	0.00327714	0.00360795	0.00404453
XMW3235	2-methyl-2-butenoic aci phenethyl ester	Ester	C13H16O2	55719-85-2	green, sweet, rose, natural, oily, leafy, herbal	-	-	-	-	-	-	-	-	-	-	-	-	-	-	-	-	-	-	-	-	-	-	-	-	-	-	-	-	-	-	-	-	-	-	-	-	-
XMW3272	Creatine	Acid	C4H9N3O2	57-00-1	-	41	9.10759e-05	0.000135578	0.000179169	0.000209721	0.000179327	0.000218219	0.000111427	0.000189197	0.000143424	0.000140658	0.000143599	0.000179799	0.000124443	0.00012345	0.000275068	0.0002149	0.000136327	0.000129501	0.000127065	0.0002097	0.000238739	0.000167655	0.000258594	0.000269139	7.3196e-05	8.35633e-05	0.000112024	0.000170428	0.000142317	0.000115515	0.000137775	0.000163837	0.000150849	0.000134984	0.000168048	0.000179322
XMW3304	4-Hexen-1-ol, 5-methyl-2-(1-methylethenyl)-	Terpenoids	C10H18O	58461-27-1	delicate, farnesol	-	-	-	-	-	-	-	-	-	-	-	-	-	-	-	-	-	-	-	-	-	-	-	-	-	-	-	-	-	-	-	-	-	-	-	-	-
XMW2330	9,12,15-Octadecatrienoic acid, ethyl ester, (Z,Z,Z)-	Ester	C20H34O2	1191-41-9	-	0.45	0.0926483	0.120221	0.0947973	0.100551	0.106122	0.0912105	0.131576	0.122147	0.113366	0.114268	0.0985944	0.0981	0.0782634	0.107897	0.108579	0.0952125	0.087136	0.0807217	0.117	0.101913	0.148528	0.122243	0.135848	0.140423	0.183597	0.129124	0.144234	0.192244	0.181224	0.159819	0.11003	0.137649	0.0930292	0.119207	0.119839	0.113166
XMW3348	Benzoic acid, 2-methoxy-, methyl ester	Ester	C9H10O3	606-45-1	herbal, floral, hyacinth, canga, fruity, black currant	-	-	-	-	-	-	-	-	-	-	-	-	-	-	-	-	-	-	-	-	-	-	-	-	-	-	-	-	-	-	-	-	-	-	-	-	-
XMW3388	Pyridine, 2-propyl-	Heterocyclic compound	C8H11N	622-39-9	green, fatty, roasted, tobacco, nutty	0.011	1.33935	1.34806	1.35154	1.22312	1.43023	1.29954	1.44085	1.55999	1.50344	1.38625	1.44953	1.477	0.58287	0.669732	0.538286	0.540029	0.555227	0.623494	0.859072	0.753182	1.14624	1.02025	0.824754	0.808465	0.664248	0.558558	0.53536	0.743582	0.612171	0.646892	1.30553	1.52113	1.33229	1.4716	1.48299	1.58253
XMW2295	10-Undecenoic acid, methyl ester	Ester	C12H22O2	111-81-9	fatty, waxy, citrus, earthy, fungal, rose, floral	-	-	-	-	-	-	-	-	-	-	-	-	-	-	-	-	-	-	-	-	-	-	-	-	-	-	-	-	-	-	-	-	-	-	-	-	-
XMW3408	S-Ethyl ethanethioate	Ester	C4H8OS	625-60-5	sulfury, fruity, onion, garlic, meaty, coffee	0.0011	353.485	359.939	356.471	346.22	347.361	356.711	340.151	359.737	339.114	360.033	343.066	346.959	340.727	365.625	347.132	338.574	346.239	338.46	353.148	341.373	365.055	359.481	353.701	374.186	349.136	347.657	346.049	356.996	361.593	337.242	323.101	344.837	347.814	357.489	365.232	347.173
XMW2293	Hexyl n-valerate	Ester	C11H22O2	1117-59-5	oily, fruity, green, brandy	-	-	-	-	-	-	-	-	-	-	-	-	-	-	-	-	-	-	-	-	-	-	-	-	-	-	-	-	-	-	-	-	-	-	-	-	-
XMW3420	Octane, 1-iodo-	Halogenated hydrocarbons	C8H17I	629-27-6	-	0.0002	154.314	164.574	162.561	157.462	152.8	158.211	153.77	173.735	154.77	166.576	161.894	157.388	150.771	158.731	158.8	151.603	153.816	159.662	151.63	142.189	177.343	166.468	155.685	156.693	151.803	163.752	151.399	154.198	162.249	156.983	140.546	145.851	146.385	154.244	149.861	150.49
XMW3422	n-Pentylpyrazine	Heterocyclic compound	C9H14N2	6303-75-9	-	0.005	35.613	48.3798	42.1525	46.9057	49.1352	48.0526	35.0033	43.9832	35.6069	36.5901	42.5999	43.0357	44.7902	47.9667	46.0531	48.7577	46.7206	45.5733	31.0799	21.6047	52.3651	36.7801	34.7485	37.807	40.1759	50.2484	45.7099	47.4154	44.5939	49.7871	45.5531	42.0538	47.8156	49.2034	43.3485	41.4635
XMW3443	Urea, phenyl-	Nitrogen compounds	C7H8N2O	64-10-8	-	540	5.68843e-06	6.72278e-06	5.64324e-06	6.41589e-06	6.43344e-06	6.74659e-06	9.38256e-07	5.90271e-06	5.30973e-06	5.29605e-06	5.71822e-06	5.39153e-06	5.77145e-06	5.65e-06	6.84651e-06	7.14184e-06	6.67322e-06	6.21506e-06	5.5875e-06	6.4699e-06	9.02456e-06	5.6853e-06	6.31621e-06	7.85949e-06	6.22815e-06	6.49753e-06	5.70074e-06	6.08277e-06	6.79957e-06	6.7976e-06	3.62188e-05	3.4435e-05	3.70199e-05	3.57973e-05	3.62082e-05	3.44576e-05
XMW3471	5-Aminovaleric acid	Acid	C5H11NO2	660-88-8	-	-	-	-	-	-	-	-	-	-	-	-	-	-	-	-	-	-	-	-	-	-	-	-	-	-	-	-	-	-	-	-	-	-	-	-	-	-
XMW3172	cis-11-Hexadecenal	Aldehyde	C16H30O	53939-28-9	waxy	-	-	-	-	-	-	-	-	-	-	-	-	-	-	-	-	-	-	-	-	-	-	-	-	-	-	-	-	-	-	-	-	-	-	-	-	-
XMW2441	Propanedioic acid	Acid	C3H4O4	141-82-2	-	68	0.000141697	0.000146761	0.000155798	0.000186608	0.000175179	0.000223564	0.00014861	0.000172728	0.000149286	0.000146413	0.000144683	0.000200623	0.000139523	0.000155497	0.000192656	0.000167241	0.000202516	0.000152834	0.000152025	0.000194156	0.00022022	0.000164978	0.000216415	0.000228601	0.000174146	0.000215055	0.000198633	0.000212109	0.000212086	0.000237186	0.000242722	0.000205809	0.000286479	0.000205323	0.000223769	0.000213987
XMW3167	Butanoic acid, 3-hydroxy-, methyl ester, (S)-	Ester	C5H10O3	53562-86-0	fruity	-	-	-	-	-	-	-	-	-	-	-	-	-	-	-	-	-	-	-	-	-	-	-	-	-	-	-	-	-	-	-	-	-	-	-	-	-
XMW3099	3-Allyl-6-methoxyphenol	Phenol	C10H12O2	501-19-9	spicy, carnation	-	-	-	-	-	-	-	-	-	-	-	-	-	-	-	-	-	-	-	-	-	-	-	-	-	-	-	-	-	-	-	-	-	-	-	-	-
XMW3018	1-Butanone, 1-(2-furanyl)-	Ketone	C8H10O2	4208-57-5	balsamic	-	-	-	-	-	-	-	-	-	-	-	-	-	-	-	-	-	-	-	-	-	-	-	-	-	-	-	-	-	-	-	-	-	-	-	-	-
XMW2932	4-Methylpentyl 4-methylpentanoate	Ester	C12H24O2	35852-42-7	fruity, waxy, soapy, herbal	-	-	-	-	-	-	-	-	-	-	-	-	-	-	-	-	-	-	-	-	-	-	-	-	-	-	-	-	-	-	-	-	-	-	-	-	-
XMW3064	Bicyclo[3.1.0]hexan-3-one, 4-methyl-1-(1-methylethyl)-, [1S-(1.alpha.,4.beta.,5.alpha.)]-	Terpenoids	C10H16O	471-15-8	herbal, warm	-	-	-	-	-	-	-	-	-	-	-	-	-	-	-	-	-	-	-	-	-	-	-	-	-	-	-	-	-	-	-	-	-	-	-	-	-
XMW2869	1.2-diacetylhydrazine	Nitrogen compounds	C4H8N2O2	3148-73-0	-	-	-	-	-	-	-	-	-	-	-	-	-	-	-	-	-	-	-	-	-	-	-	-	-	-	-	-	-	-	-	-	-	-	-	-	-	-
XMW2851	Decanoic acid, propyl ester	Ester	C13H26O2	30673-60-0	waxy, fruity, fatty, green, vegetable, woody, oily	-	-	-	-	-	-	-	-	-	-	-	-	-	-	-	-	-	-	-	-	-	-	-	-	-	-	-	-	-	-	-	-	-	-	-	-	-
XMW2824	2-Isopropylpyrazine	Heterocyclic compound	C7H10N2	29460-90-0	minty, green, nutty, honey	0.1	0.130596	0.121266	0.111377	0.120578	0.126938	0.116209	0.088227	0.082981	0.0743566	0.0792068	0.0715981	0.0891756	0.149035	0.162048	0.149914	0.185912	0.140251	0.180448	0.130791	0.159536	0.224187	0.147298	0.153662	0.167995	0.154809	0.161836	0.127692	0.147451	0.138289	0.166793	0.17581	0.170689	0.163395	0.15899	0.139037	0.141476
XMW2714	n-Propyl benzoate	Ester	C10H12O2	2315-68-6	balsamic, nutty	-	-	-	-	-	-	-	-	-	-	-	-	-	-	-	-	-	-	-	-	-	-	-	-	-	-	-	-	-	-	-	-	-	-	-	-	-
XMW3083	4H-1-Benzopyran-4-one, 2,3-dihydro-	Ketone	C9H8O2	491-37-2	-	740	4.11049e-06	2.2437e-06	2.68054e-06	2.38829e-06	2.83352e-06	2.57872e-06	3.42316e-06	4.0131e-06	3.30969e-06	3.88952e-06	3.23464e-06	3.01775e-06	3.92588e-06	3.67023e-06	4.05213e-06	5.03599e-06	3.62933e-06	2.7026e-06	4.82713e-06	4.90364e-06	6.83261e-06	5.60053e-06	4.39161e-06	5.67637e-06	6.6886e-06	5.1245e-06	5.41754e-06	6.88851e-06	7.21919e-06	6.40195e-06	7.06108e-06	6.37248e-06	6.68618e-06	7.1489e-06	6.38157e-06	6.23368e-06
XMW3110	Aminopyrazine	Amine	C4H5N3	5049-61-6	-	2850	8.13402e-06	8.40054e-06	8.2299e-06	8.40309e-06	9.33236e-06	8.3737e-06	8.25502e-06	9.45978e-06	9.0472e-06	8.00916e-06	7.69776e-06	7.87529e-06	5.84893e-06	6.09579e-06	6.24625e-06	5.83388e-06	6.41044e-06	6.77264e-06	6.36874e-06	5.58959e-06	7.20755e-06	6.78248e-06	6.57722e-06	6.48758e-06	5.84855e-06	7.07348e-06	6.60925e-06	7.17287e-06	6.56828e-06	7.39257e-06	1.06019e-05	9.15069e-06	8.53819e-06	1.09893e-05	9.5915e-06	9.8288e-06
XMW2452	1H-Pyrrole, 1-(2-furanylmethyl)-	Heterocyclic compound	C9H9NO	1438-94-4	plastic, green, waxy, fruity, coffee, vegetable	0.1	0.00127469	0.00133328	0.00123895	0.00132655	0.00134523	0.00131256	0.0011736	0.0012771	0.00118136	0.00120204	0.00116934	0.00118745	0.00116092	0.0012048	0.00122063	0.00119542	0.00121161	0.00119618	0.00660492	0.00792012	0.00848431	0.0073514	0.00769602	0.00720002	0.00127555	0.00140251	0.00132946	0.00141947	0.00135711	0.00141063	0.00129638	0.00132057	0.00136196	0.00136214	0.00140634	0.00135911
XMW3112	Isophytol	Terpenoids	C20H40O	505-32-8	mild, floral, herbal, green	0.64	0.0712971	0.0861864	0.0749065	0.086363	0.0778982	0.0721315	0.0582556	0.0575307	0.0516729	0.0547576	0.0522675	0.0510364	0.0638115	0.0645643	0.0695321	0.0692333	0.0622558	0.0677319	0.100559	0.100714	0.149148	0.110108	0.111994	0.125868	0.100195	0.0909639	0.0899722	0.113662	0.109983	0.0889675	0.0764628	0.0784475	0.0671666	0.0679668	0.0650801	0.0607216
XMW3114	Nonanoic acid, butyl ester	Ester	C13H26O2	50623-57-9	orange, apricot, rose	-	-	-	-	-	-	-	-	-	-	-	-	-	-	-	-	-	-	-	-	-	-	-	-	-	-	-	-	-	-	-	-	-	-	-	-	-
XMW2654	Oxazole, trimethyl-	Heterocyclic compound	C6H9NO	20662-84-4	nutty, nut skin, roasted, wasabi, shellfish, mustard, vegetable	0.005	25.0261	28.4258	24.5068	25.9211	26.7863	25.8321	23.4533	25.1316	23.4244	23.9018	26.6549	23.5916	23.3617	25.8174	23.8206	23.5197	23.4724	23.4717	25.024	24.7991	25.9989	27.7459	26.8605	28.4523	25.2155	27.5964	26.1562	26.7333	26.7854	27.8595	23.5382	26.2465	27.1974	24.5264	26.2884	24.1759
XMW2572	1(2H)-Naphthalenone, octahydro-4a,8a-dimethyl-7-(1-methylethyl)-, [4aR-(4a.alpha.,7.beta.,8a.alpha.)]-	Terpenoids	C15H26O	1803-39-0	-	0.05	0.274735	0.36726	0.307079	0.326852	0.340758	0.23702	0.342317	0.211065	0.345505	0.315709	0.376633	0.38702	0.336284	0.352117	0.323671	0.340076	0.33175	0.335263	0.415441	0.478864	0.71032	0.288008	0.467496	0.444304	0.394642	0.457617	0.458647	0.480327	0.449586	0.416581	0.326555	0.341471	0.281884	0.326504	0.30561	0.332362
XMW2563	Furyl hydroxymethyl ketone	Ketone	C6H6O3	17678-19-2	-	1	0.0626568	0.0649724	0.0599562	0.0588778	0.0606309	0.0577502	0.0590476	0.0617944	0.0583555	0.0593326	0.0586975	0.0574802	0.0327495	0.0348537	0.0325084	0.0314759	0.0317277	0.0344124	0.0411181	0.0395554	0.0436159	0.0428225	0.0402953	0.038601	0.0274995	0.0300839	0.0296862	0.0304213	0.0287121	0.0315417	0.0400747	0.0411846	0.0376032	0.0407179	0.0419172	0.0410197
XMW2498	2(3H)-Naphthalenone, 4,4a,5,6,7,8-hexahydro-4,4a-dimethyl-6-(1-methylethylidene)-, (4R-cis)-	Terpenoids	C15H22O	15764-04-2	warm, pleasant, powerful	0.175	0.270932	0.33519	0.309303	0.345702	0.329075	0.323521	0.308044	0.355336	0.290551	0.308335	0.281404	0.279239	0.279129	0.293947	0.365852	0.325147	0.302648	0.297844	0.279884	0.306818	0.392605	0.369956	0.369135	0.385112	0.229503	0.18013	0.187801	0.255161	0.228804	0.196602	0.22978	0.228186	0.200643	0.228781	0.257051	0.258948
XMW3154	Benzonitrile, 2-methyl-	Nitrogen compounds	C8H7N	529-19-1	-	0.2	0.63628	0.701882	0.658833	0.672996	0.708275	0.701366	0.585885	0.708503	0.612554	0.614091	0.585734	0.597364	0.666474	0.690932	0.699326	0.712204	0.725161	0.731542	0.595663	0.592049	0.700755	0.634868	0.625441	0.618618	0.339703	0.41243	0.375942	0.38781	0.384071	0.393454	0.4252	0.388739	0.394151	0.439082	0.422281	0.415611
XMW2271	1,3,5-Triazine-2,4,6-triamine	Heterocyclic compound	C3H6N6	108-78-1	-	-	-	-	-	-	-	-	-	-	-	-	-	-	-	-	-	-	-	-	-	-	-	-	-	-	-	-	-	-	-	-	-	-	-	-	-	-
XMW3506	cis-Hexenyl octyne carbonate	Ester	C15H24O2	68480-29-5	green	-	-	-	-	-	-	-	-	-	-	-	-	-	-	-	-	-	-	-	-	-	-	-	-	-	-	-	-	-	-	-	-	-	-	-	-	-
XMW2257	Myrtenyl acetate	Ester	C12H18O2	1079-01-2	herbal, fresh, sweet, fruity, citrus	-	-	-	-	-	-	-	-	-	-	-	-	-	-	-	-	-	-	-	-	-	-	-	-	-	-	-	-	-	-	-	-	-	-	-	-	-
XMW1435	Isobutyric acid, 2-pinen-10-yl ester	Ester	C14H22O2	29021-37-2	fruity, woody, pine	-	-	-	-	-	-	-	-	-	-	-	-	-	-	-	-	-	-	-	-	-	-	-	-	-	-	-	-	-	-	-	-	-	-	-	-	-
XMW3538	Phenol, 3-ethyl-5-methyl-	Phenol	C9H12O	698-71-5	-	1	0.0517742	0.0534489	0.051825	0.0539768	0.0531294	0.0537016	0.0525495	0.0587576	0.0523463	0.0549137	0.0522452	0.053928	0.0520982	0.0512729	0.0529873	0.0540777	0.0534116	0.0553611	0.0534643	0.0509612	0.0591486	0.0537656	0.0490143	0.0497712	0.0467371	0.0530928	0.0499368	0.0522587	0.0515179	0.0507808	0.0494663	0.0489832	0.0489299	0.05261	0.0523508	0.0507657
XMW1457	Benzaldehyde, 3-methoxy-	Aldehyde	C8H8O2	591-31-1	anisic	0.181	0.170303	0.181862	0.222102	0.256166	0.260728	0.246268	0.137579	0.15481	0.141699	0.145707	0.137929	0.145515	0.145981	0.165473	0.195711	0.203511	0.200968	0.195735	0.170758	0.164643	0.217626	0.166259	0.252158	0.21374	0.127337	0.120291	0.115612	0.100874	0.110856	0.13499	0.140097	0.12435	0.153815	0.171397	0.159232	0.142467
XMW1454	Isomaltol	Heterocyclic compound	C6H6O3	3420-59-5	burnt, caramel, fruity	-	-	-	-	-	-	-	-	-	-	-	-	-	-	-	-	-	-	-	-	-	-	-	-	-	-	-	-	-	-	-	-	-	-	-	-	-
XMW3648	Cyclohexanol, 5-methyl-2-(1-methylethenyl)-	Terpenoids	C10H18O	7786-67-6	minty, cool, medicinal, woody, green, grassy, herbal	-	-	-	-	-	-	-	-	-	-	-	-	-	-	-	-	-	-	-	-	-	-	-	-	-	-	-	-	-	-	-	-	-	-	-	-	-
XMW1439	Benzene, (1-nitropropyl)-	Nitrogen compounds	C9H11NO2	5279-14-1	-	-	-	-	-	-	-	-	-	-	-	-	-	-	-	-	-	-	-	-	-	-	-	-	-	-	-	-	-	-	-	-	-	-	-	-	-	-
XMW1436	5-Isopropyl-2-methylphenyl carbanilate	Ester	C17H19NO2	1155-45-9	-	-	-	-	-	-	-	-	-	-	-	-	-	-	-	-	-	-	-	-	-	-	-	-	-	-	-	-	-	-	-	-	-	-	-	-	-	-
XMW1433	2,6-Heptanedione, 3-acetyl-	Ketone	C9H14O3	29214-57-1	-	-	-	-	-	-	-	-	-	-	-	-	-	-	-	-	-	-	-	-	-	-	-	-	-	-	-	-	-	-	-	-	-	-	-	-	-	-
XMW1464	Benzene, (butoxymethyl)-	Ether	C11H16O	588-67-0	floral, rose	-	-	-	-	-	-	-	-	-	-	-	-	-	-	-	-	-	-	-	-	-	-	-	-	-	-	-	-	-	-	-	-	-	-	-	-	-
XMW1429	1-(2-Hydroxyethyl)-1,2,4-triazole	Alcohol	C4H7N3O	3273-14-1	-	-	-	-	-	-	-	-	-	-	-	-	-	-	-	-	-	-	-	-	-	-	-	-	-	-	-	-	-	-	-	-	-	-	-	-	-	-
XMW1421	3,4-Hexanedione, 1-(phenylmethoxy)-	Ketone	C13H16O3	118006-73-8	-	-	-	-	-	-	-	-	-	-	-	-	-	-	-	-	-	-	-	-	-	-	-	-	-	-	-	-	-	-	-	-	-	-	-	-	-	-
XMW1413	Hexathiane	Sulfur compounds	S6	13798-23-7	-	-	-	-	-	-	-	-	-	-	-	-	-	-	-	-	-	-	-	-	-	-	-	-	-	-	-	-	-	-	-	-	-	-	-	-	-	-
XMW3710	Fluorene	Aromatics	C13H10	86-73-7	-	-	-	-	-	-	-	-	-	-	-	-	-	-	-	-	-	-	-	-	-	-	-	-	-	-	-	-	-	-	-	-	-	-	-	-	-	-
XMW1411	1,3,6,10-Dodecatetraene, 3,7,11-trimethyl-, (Z,E)-	Terpenoids	C15H24	26560-14-5	-	0.087	1.04686	1.20219	1.0523	1.17404	1.18258	1.16534	1.00482	1.08393	1.01734	1.05282	1.03185	1.07892	1.36244	1.4285	1.44742	1.52093	1.41179	1.39377	2.00529	2.29096	3.23556	2.14728	2.19174	2.22967	3.00044	3.29029	2.99737	3.27081	3.06861	3.20897	3.46351	3.33358	3.41062	3.3829	3.26073	3.23725
XMW3734	Benzaldehyde, 2-hydroxy-	Aldehyde	C7H6O2	90-02-8	medicnal, spicy, cinnamon, wintergreen, cool	0.34	0.13554	0.140194	0.139036	0.133984	0.152406	0.144303	0.109629	0.132878	0.119996	0.117557	0.103417	0.115016	0.127826	0.136607	0.144984	0.143145	0.154496	0.150505	0.111998	0.112243	0.119408	0.128991	0.121198	0.115408	0.100813	0.119623	0.115797	0.119432	0.10552	0.117451	0.117493	0.10516	0.10505	0.113685	0.117474	0.112575
XMW3740	2-Isoamyl-6-methylpyrazine	Heterocyclic compound	C10H16N2	91010-41-2	-	9	0.000870059	0.00113359	0.0011145	0.00124916	0.00130277	0.00132151	0.00121965	0.00163319	0.00129812	0.00139945	0.00120577	0.00156084	0.000893058	0.000679057	0.00102996	0.00126692	0.000675332	0.00103592	0.00128637	0.000756234	0.00185556	0.00136931	0.00161938	0.00148977	0.00111743	0.00139428	0.00136405	0.00141714	0.00125158	0.00138513	0.00132963	0.00124787	0.00129838	0.0014221	0.00134155	0.00129902
XMW3751	Ethanone, 1-(1-methyl-1H-pyrrol-2-yl)-	Heterocyclic compound	C7H9NO	932-16-1	nutty, floral, fruity, smoky, musty	-	-	-	-	-	-	-	-	-	-	-	-	-	-	-	-	-	-	-	-	-	-	-	-	-	-	-	-	-	-	-	-	-	-	-	-	-
XMW1461	1-Amino-2-acetamino-3-fluorobenzene	Amine	C8H9FN2O	18645-85-7	-	-	-	-	-	-	-	-	-	-	-	-	-	-	-	-	-	-	-	-	-	-	-	-	-	-	-	-	-	-	-	-	-	-	-	-	-	-
XMW1467	1H-Pyrazole, 1,3,5-trimethyl-	Heterocyclic compound	C6H10N2	1072-91-9	-	-	-	-	-	-	-	-	-	-	-	-	-	-	-	-	-	-	-	-	-	-	-	-	-	-	-	-	-	-	-	-	-	-	-	-	-	-
XMW2239	Butanedioic acid, dimethyl ester	Ester	C6H10O4	106-65-0	estery, fruity, green, floral, rummy, tutti-frutti, bubble, gum, papaya	3360	4.58737e-06	3.43675e-06	3.24946e-06	3.09856e-06	2.49764e-06	3.62131e-06	2.44404e-06	3.48781e-06	2.57229e-06	3.92271e-06	3.35247e-06	3.44737e-06	3.4248e-06	3.85687e-06	2.47828e-06	3.89769e-06	2.02144e-06	3.18816e-06	3.78339e-06	2.82009e-06	4.98356e-06	2.75419e-06	2.78789e-06	3.24794e-06	3.86075e-06	5.69939e-06	5.03581e-06	4.96263e-06	2.83837e-06	3.38933e-06	2.75616e-06	3.95305e-06	3.30184e-06	4.91202e-06	4.3101e-06	3.49501e-06
XMW1490	3-Methoxycinnamaldehyde	Aldehyde	C10H10O2	56578-36-0	-	-	-	-	-	-	-	-	-	-	-	-	-	-	-	-	-	-	-	-	-	-	-	-	-	-	-	-	-	-	-	-	-	-	-	-	-	-
XMW2233	2,6-Octadien-1-ol, 3,7-dimethyl-, propanoate, (Z)-	Ester	C13H22O2	105-91-9	fruity, floral, green, jammy, berry	-	-	-	-	-	-	-	-	-	-	-	-	-	-	-	-	-	-	-	-	-	-	-	-	-	-	-	-	-	-	-	-	-	-	-	-	-
XMW3507	Urea, N-methyl-N-nitroso-	Nitrogen compounds	C2H5N3O2	684-93-5	-	-	-	-	-	-	-	-	-	-	-	-	-	-	-	-	-	-	-	-	-	-	-	-	-	-	-	-	-	-	-	-	-	-	-	-	-	-
XMW2202	Benzeneacetic acid, 3,4-dihydroxy-	Acid	C8H8O4	102-32-9	-	-	-	-	-	-	-	-	-	-	-	-	-	-	-	-	-	-	-	-	-	-	-	-	-	-	-	-	-	-	-	-	-	-	-	-	-	-
XMW1501	2,6,10-Cycloundecatrien-1-one, 2,6,9,9-tetramethyl-, (E,E,E)-	Terpenoids	C15H22O	471-05-6	-	-	-	-	-	-	-	-	-	-	-	-	-	-	-	-	-	-	-	-	-	-	-	-	-	-	-	-	-	-	-	-	-	-	-	-	-	-
XMW1495	.alpha.-Phellandrene, dimer	Aromatics	C20H32	7350-11-0	-	-	-	-	-	-	-	-	-	-	-	-	-	-	-	-	-	-	-	-	-	-	-	-	-	-	-	-	-	-	-	-	-	-	-	-	-	-
XMW1492	Benzeneacetaldehyde, .alpha.-methyl-4-(2-methylpropyl)-	Aldehyde	C13H18O	51407-46-6	-	-	-	-	-	-	-	-	-	-	-	-	-	-	-	-	-	-	-	-	-	-	-	-	-	-	-	-	-	-	-	-	-	-	-	-	-	-
XMW1491	Lavandulyl caproate	Ester	C16H28O2	59550-36-6	-	-	-	-	-	-	-	-	-	-	-	-	-	-	-	-	-	-	-	-	-	-	-	-	-	-	-	-	-	-	-	-	-	-	-	-	-	-
XMW1485	Pentanoic acid, 5-hydroxy-, 2,4-di-t-butylphenyl esters	Ester	C19H30O3	166273-38-7	-	-	-	-	-	-	-	-	-	-	-	-	-	-	-	-	-	-	-	-	-	-	-	-	-	-	-	-	-	-	-	-	-	-	-	-	-	-
XMW1468	(2,2,6-Trimethyl-bicyclo[4.1.0]hept-1-yl)-methanol	Alcohol	C11H20O	78996-11-9	-	-	-	-	-	-	-	-	-	-	-	-	-	-	-	-	-	-	-	-	-	-	-	-	-	-	-	-	-	-	-	-	-	-	-	-	-	-
XMW1478	Geranyl isobutyrate	Terpenoids	C14H24O2	2345-26-8	sweet, floral, fruity, green, peach, apricot, rose	0.013	2.8924	3.14921	2.93689	3.42081	3.3276	3.25761	2.83196	2.8225	2.75636	2.67156	2.82361	2.7758	3.03799	3.1361	3.22011	3.48563	3.20259	3.24376	3.56733	3.97992	4.85103	3.50397	3.54125	3.70005	2.71041	3.05535	2.8199	2.9428	2.89919	3.02391	2.77131	2.83976	2.88095	2.88789	2.89871	2.85551
XMW3510	trans-2-Hexenyl isovalerate	Ester	C11H20O2	68698-59-9	green, waxy, apple, pear, banana, grape	-	-	-	-	-	-	-	-	-	-	-	-	-	-	-	-	-	-	-	-	-	-	-	-	-	-	-	-	-	-	-	-	-	-	-	-	-
XMW3533	1,5-Diacetoxypentane	Ester	C9H16O4	6963-44-6	fruity	-	-	-	-	-	-	-	-	-	-	-	-	-	-	-	-	-	-	-	-	-	-	-	-	-	-	-	-	-	-	-	-	-	-	-	-	-
XMW1476	1-Propanone, 1-(4-methoxyphenyl)-	Ketone	C10H12O2	121-97-1	musty, anisic	-	-	-	-	-	-	-	-	-	-	-	-	-	-	-	-	-	-	-	-	-	-	-	-	-	-	-	-	-	-	-	-	-	-	-	-	-
XMW1473	2-Cyclohexen-1-one, 4-hydroxy-3-methyl-6-(1-methylethyl)-, trans-	Ketone	C10H16O2	55955-53-8	-	-	-	-	-	-	-	-	-	-	-	-	-	-	-	-	-	-	-	-	-	-	-	-	-	-	-	-	-	-	-	-	-	-	-	-	-	-
XMW1472	Cyclohexane, 1-ethyl-2-propyl-	Hydrocarbons	C11H22	62238-33-9	-	-	-	-	-	-	-	-	-	-	-	-	-	-	-	-	-	-	-	-	-	-	-	-	-	-	-	-	-	-	-	-	-	-	-	-	-	-
XMW1469	Benzene, 1-methoxy-4-(1-methylpropyl)-	Ether	C11H16O	4917-90-2	-	-	-	-	-	-	-	-	-	-	-	-	-	-	-	-	-	-	-	-	-	-	-	-	-	-	-	-	-	-	-	-	-	-	-	-	-	-
XMW1199	Propanoic acid, 2-methyl-, butyl ester	Ester	C8H16O2	97-87-0	sweet, fruity, green, tropical, apple, banana	0.0936	0.163786	0.133781	0.140436	0.124164	0.143716	0.134788	0.0926013	0.105933	0.0908009	0.0914091	0.0911337	0.079019	0.0680943	0.0700442	0.0621345	0.0676703	0.0677601	0.0672995	0.144032	0.156103	0.155215	0.153441	0.168958	0.129081	0.235967	0.26735	0.303233	0.219316	0.204157	0.250269	0.130745	0.12188	0.124291	0.123008	0.160783	0.126121
XMW1195	Butanoic acid, 3-methyl-3-nitroso-, methyl ester	Ester	C6H11NO3	49680-44-6	-	-	-	-	-	-	-	-	-	-	-	-	-	-	-	-	-	-	-	-	-	-	-	-	-	-	-	-	-	-	-	-	-	-	-	-	-	-
XMW0740	3-Methyl-pyrrolo(2,3-b)pyrazine	Heterocyclic compound	C7H7N3	20321-99-7	-	-	-	-	-	-	-	-	-	-	-	-	-	-	-	-	-	-	-	-	-	-	-	-	-	-	-	-	-	-	-	-	-	-	-	-	-	-
XMW0856	1-Butanone, 2-hydroxy-1-phenyl-	Ketone	C10H12O2	16183-46-3	-	-	-	-	-	-	-	-	-	-	-	-	-	-	-	-	-	-	-	-	-	-	-	-	-	-	-	-	-	-	-	-	-	-	-	-	-	-
YZMW0284	Butane, 1,1-diethoxy-	Ether	C8H18O2	3658-95-5	-	1	0.0336684	0.0310513	0.0317117	0.0342033	0.0316634	0.0317434	0.0269346	0.0281873	0.0260526	0.0271334	0.0254534	0.0282009	0.0241494	0.0238768	0.0291621	0.0266076	0.0264303	0.0242697	0.0249317	0.0266158	0.0256518	0.0273762	0.0290178	0.0243379	0.0211206	0.0267044	0.0262655	0.0276151	0.0269834	0.0273862	0.0261978	0.0301183	0.0282041	0.0344195	0.0334261	0.0297246
XMW0925	Camphenone, 6-	Ketone	C10H14O	55659-42-2	-	-	-	-	-	-	-	-	-	-	-	-	-	-	-	-	-	-	-	-	-	-	-	-	-	-	-	-	-	-	-	-	-	-	-	-	-	-
XMW0920	2-Propenoic acid, 2-methyl-, 1,2-ethanediyl ester	Ester	C10H14O4	97-90-5	-	-	-	-	-	-	-	-	-	-	-	-	-	-	-	-	-	-	-	-	-	-	-	-	-	-	-	-	-	-	-	-	-	-	-	-	-	-
XMW0918	Isocyclocitral	Aldehyde	C10H16O	1335-66-6	green, aldehydic, earthy, woody, herbal, leafy	-	-	-	-	-	-	-	-	-	-	-	-	-	-	-	-	-	-	-	-	-	-	-	-	-	-	-	-	-	-	-	-	-	-	-	-	-
XMW0917	3-Nonen-5-one	Ketone	C9H16O	82456-34-6	-	-	-	-	-	-	-	-	-	-	-	-	-	-	-	-	-	-	-	-	-	-	-	-	-	-	-	-	-	-	-	-	-	-	-	-	-	-
XMW0916	Benzene, (5-bromopentyl)-	Halogenated hydrocarbons	C11H15Br	14469-83-1	-	-	-	-	-	-	-	-	-	-	-	-	-	-	-	-	-	-	-	-	-	-	-	-	-	-	-	-	-	-	-	-	-	-	-	-	-	-
XMW0913	cis-Chrysanthenol	Terpenoids	C10H16O	55722-60-6	-	-	-	-	-	-	-	-	-	-	-	-	-	-	-	-	-	-	-	-	-	-	-	-	-	-	-	-	-	-	-	-	-	-	-	-	-	-
XMW0909	2,6,6-Trimethylbicyclo[3.2.0]hept-2-en-7-one	Ketone	C10H14O	4613-37-0	-	-	-	-	-	-	-	-	-	-	-	-	-	-	-	-	-	-	-	-	-	-	-	-	-	-	-	-	-	-	-	-	-	-	-	-	-	-
XMW0903	2-Pyrrolidinemethanamine, N-methyl-, (S)-	Heterocyclic compound	C6H14N2	66411-54-9	-	-	-	-	-	-	-	-	-	-	-	-	-	-	-	-	-	-	-	-	-	-	-	-	-	-	-	-	-	-	-	-	-	-	-	-	-	-
YZMW0293	2-Hydroxy-2-methylbutyric acid	Acid	C5H10O3	3739-30-8	-	11800	4.71963e-05	4.83932e-05	5.40465e-05	5.97901e-05	7.86055e-05	6.73064e-05	4.01728e-05	5.3113e-05	5.37684e-05	4.69856e-05	4.15349e-05	5.1783e-05	5.40014e-08	5.60424e-08	5.67784e-08	5.56059e-08	5.63592e-08	5.56413e-08	5.39936e-05	2.94358e-07	6.59773e-05	6.56918e-05	8.14967e-05	6.02923e-05	7.52077e-05	0.000100188	0.000103565	0.000106	8.28745e-05	0.00013981	9.61682e-05	6.00094e-05	6.45362e-05	6.91997e-05	6.1342e-05	6.16734e-05
XMW0896	5-Nonen-4-one, 6-methyl-	Ketone	C10H18O	7036-98-8	-	-	-	-	-	-	-	-	-	-	-	-	-	-	-	-	-	-	-	-	-	-	-	-	-	-	-	-	-	-	-	-	-	-	-	-	-	-
YZMW0295	(6R,7aR)-3,6-Dimethyl-5,6,7,7a-tetrahydrobenzofuran-2(4H)-one	Heterocyclic compound	C10H14O2	38049-04-6	-	0.0028	0.67746	0.708597	0.658463	0.70502	0.71495	0.697585	3.83253	4.35643	3.28258	3.27756	3.81313	3.15546	3.85475	3.93458	4.22428	5.6172	4.81549	4.12582	5.66333	6.60797	8.89558	5.75378	6.06775	5.99227	9.4594	10.3652	9.54565	10.7434	9.83412	9.80533	11.612	11.3534	11.8016	11.7177	10.8792	11.2444
XMW0871	Benzoic acid, 2-hydroxy-, phenylmethyl ester	Ester	C14H12O3	118-58-1	balsamic, clean, herbal, oily, sweet	0.161	5.824	6.20913	5.73105	6.33798	6.21779	6.17532	5.51475	6.75067	5.72585	5.6624	5.79842	5.80526	5.20681	5.61454	6.18055	6.8606	5.43832	5.33497	5.94567	5.7549	7.81694	6.63716	6.07882	6.89799	5.41221	5.29884	4.91702	6.03848	5.65157	5.16406	5.28483	4.88696	4.92279	4.88473	5.17925	4.87094
YZMW0303	DL-Leucine, N-acetyl-, ethyl ester	Ester	C10H19NO3	4071-36-7	-	500	0.000103218	0.000107787	9.99623e-05	0.000111455	0.000109515	0.000108005	9.33013e-05	9.75327e-05	8.82164e-05	9.30882e-05	8.94175e-05	9.51398e-05	8.79468e-05	9.35448e-05	9.80235e-05	0.000105504	9.44301e-05	9.94365e-05	0.000102126	0.000111956	0.000155136	0.000109009	0.000113861	0.000115371	0.000106986	0.000113276	0.000104864	0.000117804	0.000111434	0.000110343	0.000101079	0.000102277	0.00010292	0.00010436	9.37357e-05	9.98606e-05
XMW0869	Neoisolongifolene, 8,9-dehydro-	Terpenoids	C15H22	67517-14-0	-	-	-	-	-	-	-	-	-	-	-	-	-	-	-	-	-	-	-	-	-	-	-	-	-	-	-	-	-	-	-	-	-	-	-	-	-	-
YZMW0282	Pyrazine, 2-methoxy-5-(2-methylpropyl)-	Heterocyclic compound	C9H14N2O	36330-05-9	-	0.01	4.20146	4.47721	4.48695	4.50298	4.40686	4.44184	4.34738	4.94331	4.11422	4.55258	4.32874	4.34834	3.49207	3.48456	3.53705	3.72449	3.66951	3.75392	3.85809	4.05287	4.45096	4.25384	4.06912	3.94086	3.17165	3.62782	3.41007	3.33398	3.3869	3.18913	4.08621	3.93635	3.93777	4.41644	4.16651	4.03238
XMW0954	Cyclopropanecarboxylic acid, 2,2-dimethyl-3-(2-methyl-1-propenyl)-, (1R-trans)-	Terpenoids	C10H16O2	4638-92-0	-	-	-	-	-	-	-	-	-	-	-	-	-	-	-	-	-	-	-	-	-	-	-	-	-	-	-	-	-	-	-	-	-	-	-	-	-	-
XMW0971	Benzyl angelate	Ester	C12H14O2	37526-87-7	-	-	-	-	-	-	-	-	-	-	-	-	-	-	-	-	-	-	-	-	-	-	-	-	-	-	-	-	-	-	-	-	-	-	-	-	-	-
XMW0970	Ethanone, 1-(2,3,4-trihydroxyphenyl)-	Ketone	C8H8O4	528-21-2	-	2	0.0370318	0.0420555	0.0383867	0.0436224	0.0418993	0.0425163	0.031463	0.0354741	0.0306864	0.0323839	0.0311746	0.0322035	0.0323219	0.0326609	0.0361405	0.038224	0.0339086	0.0335942	0.0358568	0.0411597	0.0552239	0.0394865	0.039383	0.0415619	0.0360365	0.0390459	0.0373633	0.040321	0.0383695	0.0379954	0.0400597	0.0390302	0.0412622	0.0401033	0.0403671	0.0397402
YZMW0256	Oxalacetic acid	Acid	C4H4O5	328-42-7	-	500	8.07004e-05	8.03088e-05	7.80667e-05	8.56761e-05	8.21403e-05	8.04127e-05	7.22499e-05	7.7853e-05	6.95852e-05	7.34841e-05	6.91776e-05	7.49726e-05	6.50136e-05	6.87723e-05	7.00493e-05	7.55008e-05	6.66347e-05	7.11792e-05	6.4553e-05	7.16468e-05	8.68304e-05	7.10795e-05	6.6971e-05	7.14721e-05	4.10938e-05	4.33488e-05	4.09095e-05	4.33193e-05	4.14061e-05	4.24058e-05	4.34337e-05	4.31471e-05	4.44576e-05	4.56052e-05	4.26925e-05	4.3487e-05
XMW0966	1-((1S,3aR,4S,7R,7aR)-3a,7a-Dimethyloctahydro-1H-4,7-methanoinden-1-yl)ethanone	Ketone	C14H22O	66748-84-3	-	-	-	-	-	-	-	-	-	-	-	-	-	-	-	-	-	-	-	-	-	-	-	-	-	-	-	-	-	-	-	-	-	-	-	-	-	-
YZMW0257	2-Oxopentanedioic acid	Acid	C5H6O5	328-50-7	-	500	0.00176114	0.00193606	0.0017541	0.00195737	0.00194435	0.00189057	0.00149076	0.00163902	0.00141429	0.00154674	0.00145583	0.00155623	0.00204288	0.00219337	0.00226156	0.00247156	0.00210963	0.00222706	0.00206929	0.00228783	0.0029554	0.0022005	0.00216643	0.00231449	0.00225989	0.00250573	0.0023584	0.0025668	0.0024787	0.00243077	0.00235538	0.00236267	0.00235516	0.00242227	0.00235141	0.00235009
YZMW0263	5-Undecanone	Ketone	C11H22O	33083-83-9	-	0.041	3.33804	3.82953	3.34334	4.91786	3.45784	3.61766	2.84544	3.24348	3.1415	3.12061	3.34196	2.85279	3.41847	3.65125	4.51976	3.99144	3.24247	3.11406	3.58129	4.27046	3.32326	3.53819	3.54251	3.33401	2.59217	2.8003	2.92753	2.72395	2.84772	2.92673	2.78249	3.25848	3.2625	3.3105	3.42314	3.46138
XMW0952	4-Methylhexyl 3-methylbutanoate	Ester	C12H24O2	1215127-80-2	-	-	-	-	-	-	-	-	-	-	-	-	-	-	-	-	-	-	-	-	-	-	-	-	-	-	-	-	-	-	-	-	-	-	-	-	-	-
XMW0939	4-Hexen-1-ol, 5-methyl-2-(1-methylethenyl)-, acetate	Ester	C12H20O2	25905-14-0	-	-	-	-	-	-	-	-	-	-	-	-	-	-	-	-	-	-	-	-	-	-	-	-	-	-	-	-	-	-	-	-	-	-	-	-	-	-
XMW0950	Naphthalene, 1,2,3,4-tetrahydro-1,4,6-trimethyl-	Aromatics	C13H18	22824-32-4	-	-	-	-	-	-	-	-	-	-	-	-	-	-	-	-	-	-	-	-	-	-	-	-	-	-	-	-	-	-	-	-	-	-	-	-	-	-
YZMW0268	1,2-Benzenediol, 4,5-dichloro-	Alcohol	C6H4Cl2O2	3428-24-8	-	3.5	0.000517551	0.00049484	0.0004971	0.000655521	0.00065639	0.000533189	0.00194265	0.00245811	0.00190123	0.00185377	0.00196314	0.0020037	0.00464581	0.00476341	0.00537669	0.00585515	0.00483545	0.0047068	0.00457109	0.00511378	0.00706571	0.00503131	0.00518448	0.0056597	0.0199358	0.021047	0.0197332	0.0231614	0.0233353	0.020541	0.033243	0.0328428	0.0349402	0.0329883	0.0350303	0.0320349
XMW0946	Ethanol, 2-(4-ethylphenoxy)-	Alcohol	C10H14O2	54411-10-8	-	-	-	-	-	-	-	-	-	-	-	-	-	-	-	-	-	-	-	-	-	-	-	-	-	-	-	-	-	-	-	-	-	-	-	-	-	-
XMW0944	Cyclohexene, 2-ethenyl-1,3,3-trimethyl-	Hydrocarbons	C11H18	5293-90-3	-	-	-	-	-	-	-	-	-	-	-	-	-	-	-	-	-	-	-	-	-	-	-	-	-	-	-	-	-	-	-	-	-	-	-	-	-	-
YZMW0269	Benzenemethanol, 4-(1,1-dimethylethyl)-.alpha.-methyl-	Alcohol	C12H18O	34386-42-0	-	219.4	2.22968e-05	2.16939e-05	2.26718e-05	2.50632e-05	2.43277e-05	2.06061e-05	3.09919e-05	2.27767e-05	3.11207e-05	2.83262e-05	2.87693e-05	2.71722e-05	3.12566e-05	3.98129e-05	3.35161e-05	4.35394e-05	3.52593e-05	3.23701e-05	6.06298e-05	6.99587e-05	8.62217e-05	6.75266e-05	6.02857e-05	6.31689e-05	7.62716e-05	7.77871e-05	6.84374e-05	7.83873e-05	7.45592e-05	6.74292e-05	7.69541e-05	7.23209e-05	7.78661e-05	7.82324e-05	6.62215e-05	6.61944e-05
XMW0942	4-Nitro-1,3-phenylenediamine	Amine	C6H7N3O2	5131-58-8	-	-	-	-	-	-	-	-	-	-	-	-	-	-	-	-	-	-	-	-	-	-	-	-	-	-	-	-	-	-	-	-	-	-	-	-	-	-
XMW0940	Benzenemethanol, .alpha.-2-cyclohexen-1-yl-	Alcohol	C13H16O	5723-89-7	-	-	-	-	-	-	-	-	-	-	-	-	-	-	-	-	-	-	-	-	-	-	-	-	-	-	-	-	-	-	-	-	-	-	-	-	-	-
YZMW0276	2-Heptenal, 2-propyl-	Aldehyde	C10H18O	34880-43-8	-	0.15	8.13643	8.49113	8.56645	8.37826	8.14851	8.4486	8.11561	9.33069	8.22937	8.61623	8.17304	8.38904	8.31013	8.49457	8.8781	8.73123	8.56278	8.54898	8.5226	8.46258	9.21024	8.97961	8.51515	8.55104	7.39571	8.39711	7.96125	8.36156	8.27936	7.97943	7.32398	7.23049	7.2277	7.62444	7.50351	7.36949
XMW0858	1H-Indole-3-ethanamine, 6-fluoro-.beta.-methyl-	Heterocyclic compound	C11H13FN2	77590-52-4	-	-	-	-	-	-	-	-	-	-	-	-	-	-	-	-	-	-	-	-	-	-	-	-	-	-	-	-	-	-	-	-	-	-	-	-	-	-
XMW0854	4a(2H)-Naphthalenol, 1,3,4,5,6,8a-hexahydro-4,7-dimethyl-1-(1-methylethyl)-, (1S,4S,4aS,8aR)-	Terpenoids	C15H26O	73365-77-2	-	-	-	-	-	-	-	-	-	-	-	-	-	-	-	-	-	-	-	-	-	-	-	-	-	-	-	-	-	-	-	-	-	-	-	-	-	-
YZMW0091	1-Dodecanamine	Amine	C12H27N	124-22-1	-	56	0.000144091	0.000147748	0.000106043	0.000109449	0.000148746	0.000150554	0.000134621	0.000149715	0.000130589	0.000100962	0.000170022	0.000134372	0.000115288	0.000126678	0.000123046	0.000121	0.000135484	0.000148091	0.000142536	0.000117463	0.00017993	0.000134347	0.000127939	0.000136044	0.000105735	0.000125586	0.000112906	0.000146941	0.000110334	0.000129891	0.00014404	0.000125934	0.000140435	0.000124838	0.000111657	0.000143646
YZMW0308	Thiazole, 4-propyl-	Heterocyclic compound	C6H9NS	41981-60-6	-	0.3	0.0104048	0.012568	0.01058	0.0098668	0.0154123	0.0137562	0.00814513	0.0116309	0.00794296	0.00929264	0.00797279	0.00815077	0.00876863	0.0118071	0.00791085	0.00720927	0.0142616	0.0105747	0.00924241	0.0149122	0.00937699	0.00917617	0.0146722	0.0146711	0.00657027	0.0085287	0.0075938	0.00939842	0.00743333	0.00853953	0.00833419	0.00832938	0.00900065	0.00855213	0.00737878	0.00803304
XMW0776	Benzoic acid, 2-propenyl ester	Ester	C10H10O2	583-04-0	sweet, floral, cherry, berry	-	-	-	-	-	-	-	-	-	-	-	-	-	-	-	-	-	-	-	-	-	-	-	-	-	-	-	-	-	-	-	-	-	-	-	-	-
XMW0775	1-Undecene, 9-methyl-	Hydrocarbons	C12H24	74630-41-4	-	-	-	-	-	-	-	-	-	-	-	-	-	-	-	-	-	-	-	-	-	-	-	-	-	-	-	-	-	-	-	-	-	-	-	-	-	-
XMW0774	3-Hexene, 1-(1-methoxyethoxy)-, (Z)-	Ether	C9H18O2	54340-96-4	-	-	-	-	-	-	-	-	-	-	-	-	-	-	-	-	-	-	-	-	-	-	-	-	-	-	-	-	-	-	-	-	-	-	-	-	-	-
XMW0772	1,3-Cyclopentanedione, 2-acetyl-4-methyl-	Ketone	C8H10O3	4056-69-3	-	-	-	-	-	-	-	-	-	-	-	-	-	-	-	-	-	-	-	-	-	-	-	-	-	-	-	-	-	-	-	-	-	-	-	-	-	-
XMW0770	Indane	Aromatics	C9H10	496-11-7	-	0.01	0.454087	0.431913	0.475138	0.470002	0.457879	0.414723	0.437786	0.496861	0.421863	0.463364	0.44807	0.436459	0.39444	0.476869	0.400518	0.340145	0.356096	0.409311	0.417234	0.468348	0.433327	0.431746	0.429557	0.463755	0.40087	0.529282	0.48986	0.363131	0.414218	0.456297	0.452542	0.395991	0.441583	0.454747	0.390767	0.398778
XMW0766	Cyclohexanone, 5-methyl-2-(1-methylethylidene)-	Terpenoids	C10H16O	15932-80-6	minty	-	-	-	-	-	-	-	-	-	-	-	-	-	-	-	-	-	-	-	-	-	-	-	-	-	-	-	-	-	-	-	-	-	-	-	-	-
XMW0760	Guanidine	Nitrogen compounds	CH5N3	113-00-8	-	-	-	-	-	-	-	-	-	-	-	-	-	-	-	-	-	-	-	-	-	-	-	-	-	-	-	-	-	-	-	-	-	-	-	-	-	-
XMW0757	Hexadecanoic acid, 15-methyl-, methyl ester	Ester	C18H36O2	6929-04-0	-	-	-	-	-	-	-	-	-	-	-	-	-	-	-	-	-	-	-	-	-	-	-	-	-	-	-	-	-	-	-	-	-	-	-	-	-	-
XMW0755	m-Camphorene	Terpenoids	C20H32	20016-73-3	-	-	-	-	-	-	-	-	-	-	-	-	-	-	-	-	-	-	-	-	-	-	-	-	-	-	-	-	-	-	-	-	-	-	-	-	-	-
XMW0754	Methanol, (cyclohexyl)(2,3-dimethylphenyl)-	Alcohol	C15H22O	349498-47-1	-	-	-	-	-	-	-	-	-	-	-	-	-	-	-	-	-	-	-	-	-	-	-	-	-	-	-	-	-	-	-	-	-	-	-	-	-	-
XMW0750	(E)-Tetradec-2-enal	Aldehyde	C14H26O	51534-36-2	citrus, waxy, fatty, green, floral	-	-	-	-	-	-	-	-	-	-	-	-	-	-	-	-	-	-	-	-	-	-	-	-	-	-	-	-	-	-	-	-	-	-	-	-	-
XMW0749	8-Hexadecyne	Hydrocarbons	C16H30	19781-86-3	-	-	-	-	-	-	-	-	-	-	-	-	-	-	-	-	-	-	-	-	-	-	-	-	-	-	-	-	-	-	-	-	-	-	-	-	-	-
XMW0748	4-Acetyl-3,5-dimethyl-2-pyrrolecarboxylic acid, methylester	Ester	C10H13NO3	89909-47-7	-	-	-	-	-	-	-	-	-	-	-	-	-	-	-	-	-	-	-	-	-	-	-	-	-	-	-	-	-	-	-	-	-	-	-	-	-	-
YZMW0342	2-Quinolinecarboxylic acid, 4-hydroxy-	Acid	C10H7NO3	492-27-3	-	78.1	9.95315e-05	0.000121181	9.86479e-05	0.000114317	0.000101977	0.000100638	0.000129534	0.000111123	0.000122485	0.000120544	9.3021e-05	9.70257e-05	8.85982e-05	0.000119004	0.000113725	8.35606e-05	0.00010055	0.000103567	0.000109663	8.91151e-05	0.000134034	0.000114821	0.000121404	0.000111759	0.000184383	0.000120462	0.00014434	0.00018178	0.000174248	0.000139997	0.000101153	0.000111793	0.000102714	0.000100491	9.20595e-05	9.56815e-05
YZMW0347	Butanedioic acid, methyl-	Acid	C5H8O4	498-21-5	-	99	0.00108905	0.00116558	0.00110176	0.0012157	0.00123535	0.00121588	0.00105413	0.00110868	0.00100068	0.00103901	0.001026	0.0011083	0.00107281	0.00108652	0.00114251	0.00118381	0.00113778	0.00108724	0.00097808	0.00103196	0.00158403	0.000964062	0.000960728	0.00103825	0.000501374	0.000591291	0.00052815	0.000545011	0.000539182	0.000557171	0.000635456	0.000558118	0.000659437	0.000603728	0.000554922	0.000560138
XMW0744	2,6-Dodecadien-1-al	Aldehyde	C12H20O	21662-13-5	citrus, mandarin, orange, melon	-	-	-	-	-	-	-	-	-	-	-	-	-	-	-	-	-	-	-	-	-	-	-	-	-	-	-	-	-	-	-	-	-	-	-	-	-
YZMW0348	2-Butenedioic acid, 2-methyl-, (E)-	Acid	C5H6O4	498-24-8	-	65	0.00369959	0.00409344	0.0036804	0.00416277	0.00428017	0.00418386	0.00391801	0.00423969	0.00395858	0.00396603	0.00398039	0.00402469	0.00335736	0.00354037	0.00352237	0.00376125	0.00362328	0.00344103	0.00365838	0.00373305	0.00509489	0.00391088	0.00378996	0.0039411	0.00373073	0.00457571	0.00417911	0.0042437	0.00404903	0.00454607	0.00471962	0.00457835	0.00476854	0.00484589	0.00472343	0.00466213
XMW0741	1,3-Benzodioxole, 2-acetyl-4-methoxy-2-methyl-	Heterocyclic compound	C11H12O4	91057-65-7	-	-	-	-	-	-	-	-	-	-	-	-	-	-	-	-	-	-	-	-	-	-	-	-	-	-	-	-	-	-	-	-	-	-	-	-	-	-
XMW0779	2-Pentenenitrile, 4,4-dimethyl-	Nitrogen compounds	C7H11N	39168-14-4	-	-	-	-	-	-	-	-	-	-	-	-	-	-	-	-	-	-	-	-	-	-	-	-	-	-	-	-	-	-	-	-	-	-	-	-	-	-
XMW0781	2-Nitrophenyl acetate	Ester	C8H7NO4	610-69-5	-	-	-	-	-	-	-	-	-	-	-	-	-	-	-	-	-	-	-	-	-	-	-	-	-	-	-	-	-	-	-	-	-	-	-	-	-	-
XMW0788	Phenol, 4-methyl-2-nitro-, acetate (ester)	Ester	C9H9NO4	54646-55-8	-	-	-	-	-	-	-	-	-	-	-	-	-	-	-	-	-	-	-	-	-	-	-	-	-	-	-	-	-	-	-	-	-	-	-	-	-	-
YZMW0317	Metronidazole	Alcohol	C6H9N3O3	443-48-1	-	149	9.97259e-05	0.000122885	0.000114321	0.000138015	0.000138315	0.000141917	0.000112894	0.000149731	0.000108312	0.000127479	0.000117372	0.000154472	0.00012355	0.000126276	0.000163652	0.000167189	0.000129414	0.000126232	0.000136984	0.000173068	0.000215144	0.000142729	0.000176102	0.0001595	0.00011082	0.000148969	0.000136965	0.000164257	0.00015171	0.00016349	0.000147914	0.000155296	0.000175651	0.000158317	0.000140642	0.00014988
XMW0851	Pyrimidine, 4-(2-hydroxy-5-methoxyphenyl)-	Heterocyclic compound	C11H10N2O2	97630-77-8	-	-	-	-	-	-	-	-	-	-	-	-	-	-	-	-	-	-	-	-	-	-	-	-	-	-	-	-	-	-	-	-	-	-	-	-	-	-
YZMW0313	L-Tryptophan, methyl ester	Ester	C12H14N2O2	4299-70-1	-	350	5.55979e-05	6.41192e-05	5.40457e-05	6.01866e-05	6.11547e-05	5.37353e-05	5.39431e-05	5.09558e-05	4.08766e-05	4.56306e-05	3.91445e-05	4.51752e-05	4.63797e-05	6.06587e-05	5.81199e-05	5.74316e-05	4.63347e-05	5.06217e-05	8.07982e-05	8.59318e-05	0.000116988	8.4578e-05	9.11261e-05	0.000100264	7.53921e-05	7.23533e-05	7.71577e-05	7.92625e-05	8.12321e-05	6.71306e-05	5.82363e-05	6.24969e-05	5.37957e-05	5.59408e-05	4.96435e-05	5.7553e-05
XMW0841	1-Penten-3-one, 1-(4-methoxyphenyl)-4-methyl-	Ketone	C13H16O2	103-13-9	caramel, fruity, buttery	-	-	-	-	-	-	-	-	-	-	-	-	-	-	-	-	-	-	-	-	-	-	-	-	-	-	-	-	-	-	-	-	-	-	-	-	-
XMW0837	1-(3-Methylbutyl)-2,3,5,6-tetramethylbenzene	Aromatics	C15H24	116761-73-0	-	-	-	-	-	-	-	-	-	-	-	-	-	-	-	-	-	-	-	-	-	-	-	-	-	-	-	-	-	-	-	-	-	-	-	-	-	-
XMW0831	2H-1,5-Benzodiazepin-2-one, 1,3,4,5-tetrahydro-4,7,8-trimethyl-	Ketone	C12H16N2O	65847-12-3	-	-	-	-	-	-	-	-	-	-	-	-	-	-	-	-	-	-	-	-	-	-	-	-	-	-	-	-	-	-	-	-	-	-	-	-	-	-
XMW0828	2,2'-Bis(4,5-dimethylimidazole)	Heterocyclic compound	C10H14N4	69286-06-2	-	-	-	-	-	-	-	-	-	-	-	-	-	-	-	-	-	-	-	-	-	-	-	-	-	-	-	-	-	-	-	-	-	-	-	-	-	-
XMW0827	Coumarin, 3,4-dihydro-4,4,6,8-tetramethyl-	Heterocyclic compound	C13H16O2	249629-60-5	-	-	-	-	-	-	-	-	-	-	-	-	-	-	-	-	-	-	-	-	-	-	-	-	-	-	-	-	-	-	-	-	-	-	-	-	-	-
YZMW0332	4H-1-Benzopyran-4-one, 5-hydroxy-7-methoxy-2-methyl-	Ketone	C11H10O4	480-34-2	-	70	0.000217952	0.000342202	0.000302399	0.000360789	0.000291806	0.000303653	0.000276354	0.000335027	0.000257896	0.000292473	0.00026894	0.000288144	0.000268131	0.000276368	0.000357398	0.000383781	0.000275135	0.000259017	0.000343896	0.000368131	0.000486092	0.000376864	0.000388867	0.00043552	0.000395604	0.000306143	0.000318634	0.000511844	0.000422526	0.000380515	0.000373477	0.000318199	0.000304688	0.000321864	0.000349299	0.000304519
XMW0809	1,3-Pentanedione, 4,4-dimethyl-1-phenyl-	Ketone	C13H16O2	13988-67-5	-	-	-	-	-	-	-	-	-	-	-	-	-	-	-	-	-	-	-	-	-	-	-	-	-	-	-	-	-	-	-	-	-	-	-	-	-	-
XMW0805	Benzo[b]thiophene, 2-ethyl-	Heterocyclic compound	C10H10S	1196-81-2	-	-	-	-	-	-	-	-	-	-	-	-	-	-	-	-	-	-	-	-	-	-	-	-	-	-	-	-	-	-	-	-	-	-	-	-	-	-
XMW0802	2-Hydroxymethylbenzimidazole	Heterocyclic compound	C8H8N2O	22128-99-0	-	-	-	-	-	-	-	-	-	-	-	-	-	-	-	-	-	-	-	-	-	-	-	-	-	-	-	-	-	-	-	-	-	-	-	-	-	-
YZMW0338	1,8-Nonadiene	Hydrocarbons	C9H16	4900-30-5	-	11	0.00121321	0.00130048	0.0011083	0.00112534	0.00110786	0.00114386	0.00122089	0.00129152	0.00123177	0.00118476	0.00134329	0.0011594	0.000880404	0.000997511	0.000722904	0.000786202	0.000810027	0.000888105	0.000970534	0.000770254	0.00100989	0.0010886	0.000887262	0.000963753	0.000824157	0.00104948	0.000937605	0.000960946	0.000976549	0.000975894	0.00125067	0.00130727	0.00115323	0.00136439	0.00142896	0.00131478
XMW2972	1H-Benzocycloheptene, 2,4a,5,6,7,8,9,9a-octahydro-3,5,5-trimethyl-9-methylene-, (4aS-cis)-	Terpenoids	C15H24	3853-83-6	-	-	-	-	-	-	-	-	-	-	-	-	-	-	-	-	-	-	-	-	-	-	-	-	-	-	-	-	-	-	-	-	-	-	-	-	-	-
XMW0972	Khusimyl methyl ether	Ether	C16H26O	300349-20-6	-	-	-	-	-	-	-	-	-	-	-	-	-	-	-	-	-	-	-	-	-	-	-	-	-	-	-	-	-	-	-	-	-	-	-	-	-	-
YZMW0246	Fenoprofen	Acid	C15H14O3	31879-05-7	-	156	2.86571e-05	3.15337e-05	3.05547e-05	4.41679e-05	2.9478e-05	2.78767e-05	4.42453e-05	4.45912e-05	3.87128e-05	4.20743e-05	4.06518e-05	3.25245e-05	3.1698e-05	3.41598e-05	3.4071e-05	3.77806e-05	3.55888e-05	4.17875e-05	5.72676e-05	6.18212e-05	7.537e-05	6.24144e-05	5.95938e-05	6.86831e-05	3.46177e-05	2.01786e-05	2.53614e-05	3.0389e-05	2.59053e-05	2.51878e-05	2.39211e-05	3.81258e-05	2.51733e-05	2.99494e-05	4.26352e-05	3.51627e-05
XMW0973	Ketone, methyl 2,4,5-trimethylpyrrol-3-yl	Ketone	C9H13NO	19005-95-9	-	-	-	-	-	-	-	-	-	-	-	-	-	-	-	-	-	-	-	-	-	-	-	-	-	-	-	-	-	-	-	-	-	-	-	-	-	-
XMW0974	1,2,4-Methenoazulene, decahydro-1,5,5,8a-tetramethyl-, [1S-(1.alpha.,2.alpha.,3a.beta.,4.alpha.,8a.beta.,9R*)]-	Terpenoids	C15H24	1137-12-8	-	-	-	-	-	-	-	-	-	-	-	-	-	-	-	-	-	-	-	-	-	-	-	-	-	-	-	-	-	-	-	-	-	-	-	-	-	-
XMW1127	Formic acid, octyl ester	Ester	C9H18O2	112-32-3	fruity, rose, orange, waxy, cucumber	-	-	-	-	-	-	-	-	-	-	-	-	-	-	-	-	-	-	-	-	-	-	-	-	-	-	-	-	-	-	-	-	-	-	-	-	-
YZMW0144	(Z)-Ethyl 2-methylbut-2-enoate	Ester	C7H12O2	16509-44-7	-	6e-05	2857.89	2946.52	2989.45	3012.12	3049.79	2974.3	2262.01	2829.46	2445.82	2491.49	2475.96	2450.37	2320.87	2325.97	2191.6	2516.59	2378.07	2502.93	2324.46	2412.67	2344.69	2402.7	2438.44	2469.07	2122.39	2313.93	2324.11	2538.7	2566.85	2282.53	3024.53	2846.39	2838.11	3337.18	3242.02	2892.5
XMW1126	2-Cyclohexen-1-ol, 1-methyl-4-(1-methylethyl)-, trans-	Terpenoids	C10H18O	29803-81-4	-	-	-	-	-	-	-	-	-	-	-	-	-	-	-	-	-	-	-	-	-	-	-	-	-	-	-	-	-	-	-	-	-	-	-	-	-	-
XMW1125	4-Undecene, 3-methyl-, (Z)-	Hydrocarbons	C12H24	74645-87-7	-	-	-	-	-	-	-	-	-	-	-	-	-	-	-	-	-	-	-	-	-	-	-	-	-	-	-	-	-	-	-	-	-	-	-	-	-	-
XMW1122	7-Octen-2-ol	Alcohol	C8H16O	39546-75-3	-	-	-	-	-	-	-	-	-	-	-	-	-	-	-	-	-	-	-	-	-	-	-	-	-	-	-	-	-	-	-	-	-	-	-	-	-	-
XMW1120	Thiocyanic acid, 2-propenyl ester	Ester	C4H5NS	764-49-8	-	-	-	-	-	-	-	-	-	-	-	-	-	-	-	-	-	-	-	-	-	-	-	-	-	-	-	-	-	-	-	-	-	-	-	-	-	-
YZMW0154	Thiophene, tetrahydro-2-methyl-	Heterocyclic compound	C5H10S	1795-09-1	-	0.07	0.139599	0.116608	0.113616	0.127603	0.118171	0.116054	0.085748	0.0861607	0.0785178	0.0825665	0.0720031	0.079981	0.0430853	0.050256	0.038909	0.0518048	0.0325068	0.0581538	0.111836	0.128574	0.19586	0.117754	0.0682459	0.122456	0.266044	0.251681	0.23633	0.231119	0.182031	0.234642	0.139901	0.118326	0.128496	0.122272	0.132884	0.121786
YZMW0157	(3S,5R,8S)-3,8-Dimethyl-5-(prop-1-en-2-yl)-2,3,5,6,7,8-hexahydroazulen-1(4H)-one	Terpenoids	C15H22O	18374-76-0	-	8e-06	340.167	566.602	385.687	460.58	544.448	667.455	432.193	576.354	412.69	462.327	418.875	618.793	448.219	413.313	777.46	759.694	521.28	506.132	694.18	660.233	740.328	743.277	677.779	720.972	499.062	522.477	423.263	582.613	527.316	75.2886	493.679	454.518	665.765	459.378	75.0598	509.805
XMW1112	n-Caprylic acid isobutyl ester	Ester	C12H24O2	5461-06-3	fruity, green, oily, floral	-	-	-	-	-	-	-	-	-	-	-	-	-	-	-	-	-	-	-	-	-	-	-	-	-	-	-	-	-	-	-	-	-	-	-	-	-
YZMW0158	4-Heptanol, 3-methyl-	Alcohol	C8H18O	1838-73-9	-	0.078	0.772118	0.824644	0.746476	0.801797	1.27976	1.17367	0.722028	0.766926	0.672934	0.682577	0.706267	0.748844	0.605762	0.693299	0.639152	0.575735	1.10657	0.654828	0.71484	0.752747	0.932061	0.732822	0.978012	0.900804	0.763579	0.788839	0.703466	0.712118	0.654063	0.766879	0.689545	0.635622	0.789409	0.616408	0.624968	0.585539
YZMW0159	1H-Benzimidazole, 2-ethyl-	Heterocyclic compound	C9H10N2	1848-84-6	-	0.2	0.0209724	0.0400694	0.033193	0.0281122	0.0373433	0.0297526	0.0352833	0.0310012	0.0270008	0.028069	0.0335338	0.0352731	0.0255394	0.0286782	0.0375361	0.0302436	0.0344261	0.0292935	0.0273713	0.0430209	0.0449216	0.0390837	0.0441745	0.0409011	0.0461873	0.0519621	0.0383382	0.0514877	0.0440705	0.0501844	0.054391	0.0514515	0.0566742	0.0572576	0.0570888	0.054333
YZMW0163	6-tert-Butyl-2,4-dimethylphenol	Phenol	C12H18O	1879-09-0	-	0.3	0.575442	0.590985	0.515134	0.570075	0.60666	0.568313	0.525998	0.520229	0.494715	0.515743	0.489867	0.53754	0.446025	0.470335	0.473923	0.521894	0.464026	0.483913	0.434867	0.472697	0.607706	0.479471	0.4611	0.482013	0.285603	0.304033	0.286026	0.307459	0.297168	0.294412	0.300744	0.30126	0.311291	0.316341	0.294995	0.296225
XMW1102	Vinyl trans-cinnamate	Ester	C11H10O2	17719-70-9	-	-	-	-	-	-	-	-	-	-	-	-	-	-	-	-	-	-	-	-	-	-	-	-	-	-	-	-	-	-	-	-	-	-	-	-	-	-
YZMW0171	1-Decanamine	Amine	C10H23N	2016-57-1	-	126	0.000268386	0.000297772	0.00026877	0.000192335	0.000280199	0.000266385	0.000220398	0.000221817	0.000231154	0.000233271	0.000230166	0.000220595	0.000168281	0.000194091	0.000313073	0.000264804	0.000172982	0.000165956	0.000168553	0.000318332	0.000208399	0.000167691	0.000159151	0.000157224	0.000130353	0.00017961	0.000153943	0.000151459	0.000146134	0.000171434	0.000170136	0.000178839	0.000156228	0.000183868	0.000188021	0.000170785
YZMW0175	4-Methyl-3-nitrophenol	Phenol	C7H7NO3	2042-14-0	-	2	0.00365589	0.00403742	0.00380044	0.00409529	0.00401066	0.00364732	0.00408622	0.00375837	0.0032373	0.0034311	0.00360156	0.0037683	0.00519125	0.0054126	0.00570729	0.00519395	0.00492915	0.00491573	0.00719821	0.00848836	0.0114071	0.00799991	0.00789531	0.00809469	0.0163017	0.0166144	0.0153413	0.0172029	0.0168039	0.016647	0.0194909	0.0193374	0.019776	0.0196094	0.0193605	0.0197481
XMW1100	2-Buten-1-one, 1-(2,6,6-trimethyl-1-cyclohexen-1-yl)-	Ketone	C13H20O	35044-68-9	fruity, floral, black currant, currant, plum, rose, honey, tobacco	-	-	-	-	-	-	-	-	-	-	-	-	-	-	-	-	-	-	-	-	-	-	-	-	-	-	-	-	-	-	-	-	-	-	-	-	-
XMW1099	Hexanoic acid, 1-methylhexyl ester	Ester	C13H26O2	6624-58-4	-	-	-	-	-	-	-	-	-	-	-	-	-	-	-	-	-	-	-	-	-	-	-	-	-	-	-	-	-	-	-	-	-	-	-	-	-	-
XMW1095	Benzene, 1,2-diethyl-3,4,5,6-tetramethyl-	Aromatics	C14H22	33884-69-4	-	-	-	-	-	-	-	-	-	-	-	-	-	-	-	-	-	-	-	-	-	-	-	-	-	-	-	-	-	-	-	-	-	-	-	-	-	-
XMW1129	Ethyl mandelate	Ester	C10H12O3	774-40-3	-	-	-	-	-	-	-	-	-	-	-	-	-	-	-	-	-	-	-	-	-	-	-	-	-	-	-	-	-	-	-	-	-	-	-	-	-	-
XMW1132	3-Amino-4-pyrazolecarbonitrile	Heterocyclic compound	C4H4N4	16617-46-2	-	-	-	-	-	-	-	-	-	-	-	-	-	-	-	-	-	-	-	-	-	-	-	-	-	-	-	-	-	-	-	-	-	-	-	-	-	-
XMW1138	6-Octen-1-ol, 7-methyl-3-methylene-	Terpenoids	C10H18O	13066-51-8	-	-	-	-	-	-	-	-	-	-	-	-	-	-	-	-	-	-	-	-	-	-	-	-	-	-	-	-	-	-	-	-	-	-	-	-	-	-
YZMW0115	Butanoic acid, 2-methylphenyl ester	Ester	C11H14O2	14617-90-4	-	12	0.00181524	0.00167972	0.00143519	0.00128499	0.00203385	0.00134623	0.00129772	0.00105691	0.00115846	0.00121854	0.00120687	0.00123442	0.00114926	0.00184191	0.000823402	0.00173307	0.000910247	0.00143789	0.00165754	0.00141802	0.00250975	0.00200607	0.00238036	0.00149668	0.00113173	0.00179423	0.00152024	0.00146794	0.00126513	0.0016215	0.0021597	0.00144179	0.00172796	0.00165987	0.00136883	0.00141577
XMW1191	3-Buten-2-one, 4-(2,5,6,6-tetramethyl-1-cyclohexen-1-yl)-	Ketone	C14H22O	79-70-9	fresh, sweet, violet, berry, woody, powdery	-	-	-	-	-	-	-	-	-	-	-	-	-	-	-	-	-	-	-	-	-	-	-	-	-	-	-	-	-	-	-	-	-	-	-	-	-
XMW1184	(Z)-Deca-8-en-4,6-diyn-1-yl 3-methylbutanoate	Ester	C15H20O2	126693-81-0	-	-	-	-	-	-	-	-	-	-	-	-	-	-	-	-	-	-	-	-	-	-	-	-	-	-	-	-	-	-	-	-	-	-	-	-	-	-
YZMW0100	Dibenzothiophene	Heterocyclic compound	C12H8S	132-65-0	-	3.3	0.00151436	0.00201652	0.00179341	0.00266776	0.00207505	0.00182294	0.0021509	0.00318941	0.00208217	0.00251914	0.00247589	0.00271896	0.00182773	0.00211333	0.00281379	0.00297791	0.00230987	0.00233097	0.00365311	0.00400305	0.00682105	0.00400367	0.00373265	0.00552642	0.00147735	0.00153464	0.00141485	0.00186939	0.00150844	0.00161548	0.00144053	0.00110339	0.00148013	0.0011905	0.00113566	0.00121422
YZMW0113	n-Propyl cyanoacetate	Ester	C6H9NO2	14447-15-5	-	864	7.9254e-06	7.63559e-06	5.75339e-06	6.47042e-06	7.22771e-06	6.88443e-06	6.95589e-06	6.08936e-06	5.74675e-06	6.03479e-06	6.08756e-06	6.95545e-06	5.43687e-06	6.49473e-06	4.99281e-06	5.12772e-06	5.59817e-06	5.9111e-06	7.65508e-06	8.82792e-06	1.13033e-05	7.63374e-06	7.4134e-06	1.3096e-05	8.36509e-06	7.52065e-06	6.94327e-06	8.42683e-06	7.26753e-06	8.39689e-06	5.91812e-06	5.53168e-06	8.13847e-06	6.7175e-06	5.09859e-06	6.2599e-06
XMW1180	(1R,1aR,2aS,5R,6R,6aS,7aS)-1,6,6a-trimethyldecahydro-1,2a-methanocyclopropa[b]naphthalen-5-ol	Terpenoids	C15H24O	860769-47-7	-	-	-	-	-	-	-	-	-	-	-	-	-	-	-	-	-	-	-	-	-	-	-	-	-	-	-	-	-	-	-	-	-	-	-	-	-	-
XMW1173	Acetic acid, [(1-thioxoethyl)thio]-	Acid	C4H6O2S2	17930-82-4	-	-	-	-	-	-	-	-	-	-	-	-	-	-	-	-	-	-	-	-	-	-	-	-	-	-	-	-	-	-	-	-	-	-	-	-	-	-
XMW1171	Benzene, 1-methoxy-4-phenoxy-	Ether	C13H12O2	1655-69-2	-	-	-	-	-	-	-	-	-	-	-	-	-	-	-	-	-	-	-	-	-	-	-	-	-	-	-	-	-	-	-	-	-	-	-	-	-	-
XMW0031	1,4-Methanoazulen-3-ol, decahydro-1,5,5,8a-tetramethyl-, [1S-(1.alpha.,3.beta.,3a.beta.,4.alpha.,8a.beta.)]-	Terpenoids	C15H26O	99481-30-8	-	-	-	-	-	-	-	-	-	-	-	-	-	-	-	-	-	-	-	-	-	-	-	-	-	-	-	-	-	-	-	-	-	-	-	-	-	-
YZMW0143	3-Quinuclidinol	Alcohol	C7H13NO	1619-34-7	-	380	0.000726134	0.000807905	0.000745895	0.000747618	0.000772051	0.000746468	0.000630692	0.000774954	0.000635546	0.000685447	0.000655651	0.000633873	0.000781813	0.000736403	0.00076526	0.000761481	0.000782551	0.000739577	0.000655764	0.000689571	0.000755658	0.000709888	0.000736515	0.000769475	0.000391899	0.000520607	0.0004616	0.000456832	0.000474116	0.00055432	0.000503421	0.000488071	0.000508151	0.000532182	0.000505146	0.000455216
XMW1163	Ethyl 2-hydroxybenzyl sulfone	Phenol	C9H12O3S	53380-27-1	-	-	-	-	-	-	-	-	-	-	-	-	-	-	-	-	-	-	-	-	-	-	-	-	-	-	-	-	-	-	-	-	-	-	-	-	-	-
YZMW0124	Cyclodecanone	Ketone	C10H18O	1502-06-3	-	0.29	0.0913219	0.101736	0.0928277	0.0934404	0.103195	0.102855	0.0933861	0.102326	0.0928128	0.0966829	0.0959338	0.0999405	0.0719288	0.075999	0.0735388	0.0730568	0.0779325	0.0763573	0.0905933	0.0947185	0.119158	0.0874215	0.0873473	0.0937102	0.0610679	0.0702557	0.064299	0.0662377	0.0688758	0.0631017	0.0739964	0.0746952	0.0778674	0.0835838	0.0807162	0.0787378
XMW1156	Cyclopentanecarbonitrile, 3-(1-methylethylidene)-	Nitrogen compounds	C9H13N	89683-72-7	-	-	-	-	-	-	-	-	-	-	-	-	-	-	-	-	-	-	-	-	-	-	-	-	-	-	-	-	-	-	-	-	-	-	-	-	-	-
YZMW0127	Ethyl 3-cyclohexenecarboxylate	Ester	C9H14O2	15111-56-5	-	3e-06	12105.1	12913.6	12320.5	12619	12487.4	11943	10184.1	11733.1	10021.3	10547	10183.4	10150.8	8823.1	8980.49	8766.97	9386.39	9133.71	9825.77	9256.46	8625.27	10207.4	10033.2	8711.26	9139.42	4376.66	3561.22	4687.93	4704.79	3854.7	4609.01	5048.59	5499.91	5249.32	5750.74	5578.06	5302.22
XMW1144	4-Acetoxy-3-methoxystyrene	Ester	C11H12O3	46316-15-8	-	-	-	-	-	-	-	-	-	-	-	-	-	-	-	-	-	-	-	-	-	-	-	-	-	-	-	-	-	-	-	-	-	-	-	-	-	-
YZMW0138	Phenol, 4-chloro-2-methyl-	Phenol	C7H7ClO	1570-64-5	-	0.12	0.0731045	0.106839	0.0695433	0.105275	0.0722642	0.0937571	0.0854863	0.0779189	0.0611602	0.0951711	0.0475008	0.0867129	0.0994762	0.0670965	0.0891381	0.0878054	0.0481387	0.0998318	0.0975076	0.13701	0.153167	0.112395	0.0654639	0.0773306	0.0573696	0.0460347	0.0622792	0.0520203	0.0386845	0.0515275	0.0505335	0.0884566	0.0625127	0.0662113	0.0497227	0.0549204
XMW1140	Thymoquinone	Ketone	C10H12O2	490-91-5	-	-	-	-	-	-	-	-	-	-	-	-	-	-	-	-	-	-	-	-	-	-	-	-	-	-	-	-	-	-	-	-	-	-	-	-	-	-
YZMW0176	2-Amino-2-norbornanecarboxylic acid	Acid	C8H13NO2	20448-79-7	-	7800	2.54653e-05	2.50332e-05	2.46523e-05	2.81095e-05	2.58761e-05	2.58608e-05	2.31441e-05	2.54653e-05	2.27544e-05	2.33969e-05	2.1935e-05	2.24199e-05	2.06432e-05	1.86413e-05	2.26557e-05	2.28708e-05	2.18276e-05	2.19187e-05	2.40555e-05	3.03321e-05	2.2297e-05	2.4405e-05	2.54167e-05	2.66599e-05	1.82892e-05	1.80699e-05	1.73036e-05	1.97113e-05	1.69075e-05	1.84685e-05	1.90475e-05	1.93819e-05	2.03791e-05	1.97047e-05	2.24748e-05	2.11916e-05
YZMW0178	Diethyl pimelate	Ester	C11H20O4	2050-20-6	-	396	8.49726e-05	8.76347e-05	8.69522e-05	9.24434e-05	8.3689e-05	8.97021e-05	6.26375e-05	6.98165e-05	5.84737e-05	6.6989e-05	6.68224e-05	6.5312e-05	0.000106819	0.000105319	0.000105489	0.000122065	9.8551e-05	0.000108217	9.78004e-05	9.78312e-05	0.00014399	0.000101254	0.000102493	0.000109339	0.000121023	0.000124936	0.00012803	0.000133137	0.000130297	0.000129598	0.000130218	0.000129855	0.000123452	0.000136802	0.00013181	0.000128222
XMW1003	4,4-Dimethyl-1,2,3,4-tetrahydro-.gamma.-carboline	Heterocyclic compound	C13H16N2	22315-87-3	-	-	-	-	-	-	-	-	-	-	-	-	-	-	-	-	-	-	-	-	-	-	-	-	-	-	-	-	-	-	-	-	-	-	-	-	-	-
XMW1033	trans-Valerenyl acetate	Ester	C17H26O2	101527-74-6	-	-	-	-	-	-	-	-	-	-	-	-	-	-	-	-	-	-	-	-	-	-	-	-	-	-	-	-	-	-	-	-	-	-	-	-	-	-
XMW1020	(3-Bromo-1-methylpropoxymethyl)benzene	Halogenated hydrocarbons	C11H15BrO	51666-29-6	-	-	-	-	-	-	-	-	-	-	-	-	-	-	-	-	-	-	-	-	-	-	-	-	-	-	-	-	-	-	-	-	-	-	-	-	-	-
XMW1018	1-Phenylcyclohexylamine	Amine	C12H17N	2201-24-3	-	-	-	-	-	-	-	-	-	-	-	-	-	-	-	-	-	-	-	-	-	-	-	-	-	-	-	-	-	-	-	-	-	-	-	-	-	-
XMW1016	(4,4-Dimethyl-2,4,5,6-tetrahydro-1H-inden-2-yl)acetic acid	Acid	C13H18O2	113522-67-1	-	-	-	-	-	-	-	-	-	-	-	-	-	-	-	-	-	-	-	-	-	-	-	-	-	-	-	-	-	-	-	-	-	-	-	-	-	-
XMW1015	Nonylamine, 1-heptyl-	Amine	C16H35N	24539-83-1	-	-	-	-	-	-	-	-	-	-	-	-	-	-	-	-	-	-	-	-	-	-	-	-	-	-	-	-	-	-	-	-	-	-	-	-	-	-
XMW1014	5-Pyrimidinamine, 2-chloro-4-ethoxy-	Heterocyclic compound	C6H8ClN3O	54484-70-7	-	-	-	-	-	-	-	-	-	-	-	-	-	-	-	-	-	-	-	-	-	-	-	-	-	-	-	-	-	-	-	-	-	-	-	-	-	-
XMW1007	N-(4-Methylphenyl)-2-diazo-2-cyano-acetamide	Amine	C10H8N4O	122098-07-1	-	-	-	-	-	-	-	-	-	-	-	-	-	-	-	-	-	-	-	-	-	-	-	-	-	-	-	-	-	-	-	-	-	-	-	-	-	-
XMW1005	3-[4-Hydroxyisopent-2(Z)-enyl]-4-hydroxyacetophenone	Ketone	C13H16O3	24672-83-1	-	-	-	-	-	-	-	-	-	-	-	-	-	-	-	-	-	-	-	-	-	-	-	-	-	-	-	-	-	-	-	-	-	-	-	-	-	-
XMW1002	Isolongifolene, 4,5,9,10-dehydro-	Hydrocarbons	C15H20	156747-45-4	-	-	-	-	-	-	-	-	-	-	-	-	-	-	-	-	-	-	-	-	-	-	-	-	-	-	-	-	-	-	-	-	-	-	-	-	-	-
XMW1036	Cyclobuta[1,2:3,4]dicyclooctene, 1,2,5,6,6a,6b,7,8,11,12,12a,12b-dodecahydro-, (6a.alpha.,6b.beta.,12a.alpha.,12b.beta.)-	Hydrocarbons	C16H24	61277-44-9	-	-	-	-	-	-	-	-	-	-	-	-	-	-	-	-	-	-	-	-	-	-	-	-	-	-	-	-	-	-	-	-	-	-	-	-	-	-
XMW1000	(E)-5-((1R,3R,6S)-2,3-Dimethyltricyclo[2.2.1.02,6]heptan-3-yl)-2-methylpent-2-enal	Terpenoids	C15H22O	19903-70-9	-	-	-	-	-	-	-	-	-	-	-	-	-	-	-	-	-	-	-	-	-	-	-	-	-	-	-	-	-	-	-	-	-	-	-	-	-	-
XMW0989	12-Oxatetracyclo[4.3.1.1(2,5).1(4,10)]dodecane, 11-isopropylidene-	Heterocyclic compound	C14H20O	105191-67-1	-	-	-	-	-	-	-	-	-	-	-	-	-	-	-	-	-	-	-	-	-	-	-	-	-	-	-	-	-	-	-	-	-	-	-	-	-	-
YZMW0225	4-n-Propylacetophenone	Ketone	C11H14O	2932-65-2	-	151.5	0.00456412	0.00437834	0.00399551	0.00437654	0.00446613	0.00422103	0.00977028	0.00955407	0.00875414	0.00933672	0.00870344	0.0100439	0.0157611	0.0169067	0.0167302	0.0190307	0.016143	0.0176934	0.0363024	0.0416753	0.0540051	0.0389671	0.0384628	0.0419793	0.0532079	0.053449	0.0486719	0.056523	0.0515201	0.0523874	0.0501696	0.0486302	0.0499784	0.0490162	0.0445044	0.0465085
XMW0988	Isoquinoline, 1-butyl-3,4-dihydro-	Heterocyclic compound	C13H17N	33351-43-8	-	-	-	-	-	-	-	-	-	-	-	-	-	-	-	-	-	-	-	-	-	-	-	-	-	-	-	-	-	-	-	-	-	-	-	-	-	-
YZMW0227	Benzaldehyde, 2,3,4,5-tetramethyl-	Aldehyde	C11H14O	29344-95-4	-	0.35	0.0595081	0.0731462	0.066374	0.0752343	0.0759714	0.0777376	0.0872318	0.0927727	0.0817325	0.0887334	0.0898154	0.0920794	0.148903	0.155497	0.160945	0.17254	0.15467	0.160616	0.206087	0.23669	0.325797	0.219503	0.214477	0.234954	0.309382	0.322567	0.301487	0.338452	0.312511	0.31215	0.329554	0.318618	0.331503	0.322251	0.299494	0.305187
XMW0979	(4R,4aS,6S)-4,4a-Dimethyl-6-(prop-1-en-2-yl)-1,2,3,4,4a,5,6,7-octahydronaphthalene	Terpenoids	C15H24	823810-22-6	-	-	-	-	-	-	-	-	-	-	-	-	-	-	-	-	-	-	-	-	-	-	-	-	-	-	-	-	-	-	-	-	-	-	-	-	-	-
YZMW0242	Phenol, 3-methyl-4-(methylthio)-	Phenol	C8H10OS	3120-74-9	-	0.2	0.131145	0.0117451	0.155941	0.156357	0.174834	0.057813	0.197783	0.264236	0.184359	0.190316	0.208076	0.235766	0.382521	0.399695	0.417373	0.457017	0.395053	0.416272	0.679173	0.769801	1.05699	0.724853	0.739767	0.765176	1.52765	1.61934	1.50411	1.68876	1.58974	1.57502	1.83216	1.77913	1.82797	1.82058	1.72159	1.75053
YZMW0221	Cyclooctanecarboxylic acid, 1-amino-	Acid	C9H17NO2	28248-38-6	-	340	6.64517e-06	1.22575e-05	7.50916e-06	1.02949e-05	9.38243e-06	9.08998e-06	9.28187e-06	1.27723e-05	9.77565e-06	8.95072e-06	9.73907e-06	1.08327e-05	8.01622e-06	1.03407e-05	9.36459e-06	9.95671e-06	9.8216e-06	8.13238e-06	1.23928e-05	1.59737e-05	1.88152e-05	1.22675e-05	1.32479e-05	1.42748e-05	1.03015e-05	1.11126e-05	1.07298e-05	1.23935e-05	1.17891e-05	9.17585e-06	1.05825e-05	1.12923e-05	1.1697e-05	1.11932e-05	1.18716e-05	1.30539e-05
XMW1037	Phenol, 5-(1,5-dimethyl-4-hexenyl)-2-methyl-, (R)-	Terpenoids	C15H22O	30199-26-9	-	-	-	-	-	-	-	-	-	-	-	-	-	-	-	-	-	-	-	-	-	-	-	-	-	-	-	-	-	-	-	-	-	-	-	-	-	-
XMW1091	1-Pentanol, 5-[(tetrahydro-2H-pyran-2-yl)oxy]-	Alcohol	C10H20O3	76102-74-4	-	-	-	-	-	-	-	-	-	-	-	-	-	-	-	-	-	-	-	-	-	-	-	-	-	-	-	-	-	-	-	-	-	-	-	-	-	-
YZMW0184	L-Azetidine-2-carboxylic acid	Acid	C4H7NO2	2133-34-8	-	607	7.84642e-06	5.71908e-06	6.18846e-06	5.99321e-06	6.84145e-06	5.64493e-06	7.57172e-06	5.94576e-06	5.97902e-06	7.20936e-06	5.12775e-06	6.06454e-06	6.78995e-06	7.52778e-06	7.21799e-06	6.74913e-06	7.91355e-06	6.19446e-06	4.71254e-06	7.19262e-06	6.92005e-06	5.79287e-06	5.11811e-06	4.15857e-06	3.10817e-06	4.51108e-06	3.77754e-06	4.53917e-06	2.55077e-06	3.32564e-06	3.65263e-06	3.4383e-06	2.93486e-06	4.15304e-06	4.35613e-06	4.25622e-06
XMW1089	Hexanoic acid, cyclopentyl ester	Ester	C11H20O2	5413-59-2	-	-	-	-	-	-	-	-	-	-	-	-	-	-	-	-	-	-	-	-	-	-	-	-	-	-	-	-	-	-	-	-	-	-	-	-	-	-
XMW1086	Butanoic acid, heptyl ester	Ester	C11H22O2	5870-93-9	-	-	-	-	-	-	-	-	-	-	-	-	-	-	-	-	-	-	-	-	-	-	-	-	-	-	-	-	-	-	-	-	-	-	-	-	-	-
XMW1084	2-Butenoic acid, 3-hexenyl ester, (E,Z)-	Ester	C10H16O2	65405-80-3	green, vegetable	-	-	-	-	-	-	-	-	-	-	-	-	-	-	-	-	-	-	-	-	-	-	-	-	-	-	-	-	-	-	-	-	-	-	-	-	-
XMW1083	7-Octene-2,6-diol, 2,6-dimethyl-	Alcohol	C10H20O2	29210-77-3	-	-	-	-	-	-	-	-	-	-	-	-	-	-	-	-	-	-	-	-	-	-	-	-	-	-	-	-	-	-	-	-	-	-	-	-	-	-
XMW1067	Butanoic acid, 2-pentenyl ester, (Z)-	Ester	C9H16O2	42125-13-3	-	-	-	-	-	-	-	-	-	-	-	-	-	-	-	-	-	-	-	-	-	-	-	-	-	-	-	-	-	-	-	-	-	-	-	-	-	-
YZMW0220	Piperazine, 2,5-dimethyl-, trans-	Heterocyclic compound	C6H14N2	2815-34-1	-	1140	7.91895e-06	7.37296e-06	9.6901e-06	1.08529e-05	1.12246e-05	1.00013e-05	8.51497e-06	1.27651e-05	9.05928e-06	7.79944e-06	5.45105e-06	1.06341e-05	1.01224e-05	6.88414e-06	1.49053e-05	1.16914e-05	1.22653e-05	1.17926e-05	5.75473e-06	1.28308e-05	1.13745e-05	7.1557e-06	8.62712e-06	7.40125e-06	2.41668e-05	7.96537e-06	5.34137e-07	3.41106e-06	1.33901e-05	4.47557e-06	2.60423e-06	4.74945e-06	6.16916e-06	6.8536e-06	7.29308e-06	4.50165e-06
YZMW0211	Cyclohexadecanone	Ketone	C16H30O	2550-52-9	-	0.0073	20.4837	25.672	24.3131	28.9494	24.8885	26.7873	21.4791	27.2123	19.8955	20.9694	21.5415	21.7904	25.45	23.9386	29.464	34.3923	26.7183	26.569	21.6154	27.4704	39.7861	24.6744	26.2577	29.4513	15.7773	15.4171	14.6154	18.2907	17.7056	14.8457	18.1369	16.5484	16.2426	16.4468	16.8341	16.0146
YZMW0214	Phenol, 3-methyl-4-nitro-	Phenol	C7H7NO3	2581-34-2	-	5	0.000720441	0.000867546	0.000935206	0.000447267	0.000849306	0.000905575	0.00087604	0.000966638	0.00095134	0.00104958	0.000717111	0.0011672	6.49799e-05	6.74358e-05	6.83215e-05	6.69106e-05	6.7817e-05	6.69532e-05	0.00111391	0.00110761	0.00128318	0.00156153	0.00102612	0.00102156	0.000902189	0.00115718	0.00104455	0.00100451	0.00110985	0.0010656	0.000784744	0.000725802	0.000381162	0.000683976	0.000723504	0.000848171
XMW1061	Thiophene, 2-hexyl-	Heterocyclic compound	C10H16S	18794-77-9	floral, fruity, gassy, green, meaty	-	-	-	-	-	-	-	-	-	-	-	-	-	-	-	-	-	-	-	-	-	-	-	-	-	-	-	-	-	-	-	-	-	-	-	-	-
YZMW0217	.gamma.-Tetradecalactone	Ester	C14H26O2	2721-23-5	-	12	0.00164791	0.00197881	0.00187561	0.00214907	0.00192227	0.00224777	0.00187646	0.00199598	0.00219079	0.0021306	0.00228635	0.00205496	0.00166613	0.00163869	0.00194536	0.00246317	0.00187449	0.00175512	0.00202372	0.00136865	0.00369002	0.00152358	0.00224871	0.00233386	0.00205588	0.00176893	0.00201063	0.00228256	0.00201031	0.00210133	0.00227926	0.00199402	0.00187044	0.00205796	0.00261129	0.00223287
YZMW0219	Cyclohexanecarboxylic acid, 1-amino-	Acid	C7H13NO2	2756-85-6	-	3710	2.34861e-05	2.50613e-05	2.29568e-05	2.51484e-05	2.49402e-05	2.40087e-05	3.26347e-05	3.29686e-05	3.02252e-05	3.2487e-05	3.06926e-05	3.33879e-05	4.36937e-05	4.66575e-05	4.72791e-05	5.17523e-05	4.63035e-05	4.91062e-05	9.65619e-05	0.000109801	0.000146304	0.00010395	0.000101127	0.000108994	0.000132521	0.00013617	0.000124709	0.000141458	0.000130637	0.000132922	0.000138264	0.000135565	0.000137561	0.000137618	0.000124803	0.000129105
XMW1038	Longifolenaldehyde	Terpenoids	C15H24O	19890-84-7	-	-	-	-	-	-	-	-	-	-	-	-	-	-	-	-	-	-	-	-	-	-	-	-	-	-	-	-	-	-	-	-	-	-	-	-	-	-
XMW1167	(1R,3E,7E,11R)-1,5,5,8-Tetramethyl-12-oxabicyclo[9.1.0]dodeca-3,7-diene	Terpenoids	C15H24O	19888-34-7	-	0.45	0.0178444	0.0200601	0.0178072	0.0262341	0.0200843	0.0229327	0.0181793	0.0176717	0.0196887	0.0186906	0.0172102	0.0200671	0.0266063	0.0225984	0.0270663	0.0307995	0.0290962	0.0234642	0.0202338	0.034228	0.036861	0.0244035	0.0232104	0.0282816	0.024323	0.0260859	0.0249451	0.0311757	0.0283361	0.0294387	0.0240921	0.0259198	0.0255102	0.0239367	0.0247531	0.0252628
XMW0028	Pyridine, 2,3,4,5-tetrahydro-6-propyl-	Heterocyclic compound	C8H15N	1604-01-9	-	-	-	-	-	-	-	-	-	-	-	-	-	-	-	-	-	-	-	-	-	-	-	-	-	-	-	-	-	-	-	-	-	-	-	-	-	-
KMW0312	Furan, 3-(4-methyl-3-pentenyl)-	Terpenoids	C10H14O	539-52-6	woody	-	-	-	-	-	-	-	-	-	-	-	-	-	-	-	-	-	-	-	-	-	-	-	-	-	-	-	-	-	-	-	-	-	-	-	-	-
KMW0381	Hexanoic acid, butyl ester	Ester	C10H20O2	626-82-4	fruity, pineapple, berry, apple, juicy, green, winey, waxy, cognac, soapy	0.7	0.0448662	0.0364572	0.0356637	0.0370867	0.0338622	0.0328417	0.0398607	0.0363566	0.0349804	0.0427639	0.0421159	0.0344048	0.0318308	0.0404283	0.0350166	0.0373235	0.0329554	0.0322856	0.0413657	0.0320332	0.0398893	0.0397918	0.0341961	0.0348878	0.0406562	0.0427394	0.0439075	0.0414126	0.0428155	0.0332866	0.0366384	0.0446349	0.0344108	0.0383147	0.0438926	0.0447311
KMW0364	Phenethyl mercaptan	Alcohol	C8H10S	4410-99-5	rubbery, sulfury	5	0.00329129	0.00326337	0.00317239	0.00311332	0.00304845	0.00313262	0.00237145	0.00272573	0.00230061	0.00224151	0.00215167	0.00222499	0.00136169	0.00135122	0.00118291	0.00131953	0.00140454	0.00146188	0.00124212	0.00123393	0.00132556	0.00135272	0.00132619	0.00123933	0.00100089	0.000883479	0.000983369	0.000950717	0.000835356	0.000887212	0.00142862	0.00134262	0.00126574	0.00137083	0.00153539	0.00142884
KMW0340	2-Octanol, acetate	Ester	C10H20O2	2051-50-5	fruity	0.1	0.0658477	0.0644056	0.0558268	0.0561486	0.062864	0.0762087	0.0542114	0.0667839	0.050644	0.0634354	0.0514288	0.0581011	0.0722998	0.0645437	0.0722918	0.0741701	0.0682755	0.0807548	0.0609414	0.0728818	0.0724487	0.0529607	0.0502594	0.0546993	0.0336611	0.04499	0.0382285	0.0458711	0.0320133	0.0338007	0.0357052	0.040446	0.0446945	0.0390805	0.030899	0.0406792
KMW0335	Cyclohexanol, 1-methyl-4-(1-methylethenyl)-	Terpenoids	C10H18O	138-87-4	pungent, earthy, woody	6	0.00204906	0.00213987	0.00203394	0.00192512	0.00264932	0.00259862	0.00193917	0.00207524	0.00193272	0.00199811	0.00189601	0.00209236	0.00181663	0.00190096	0.00198974	0.00134291	0.00190476	0.0018268	0.00251515	0.00243131	0.00238572	0.00197794	0.00234982	0.0026029	0.00187672	0.00208037	0.00198089	0.00214016	0.00185038	0.00202052	0.00189509	0.00187272	0.00193591	0.00191549	0.00145714	0.00149565
KMW0334	Cyclohexanone, 5-methyl-2-(1-methylethyl)-	Terpenoids	C10H18O	10458-14-7	minty	0.0047	28.5348	29.7041	27.0481	27.6824	28.8929	27.6917	19.8416	21.7558	20.3827	20.1996	19.961	19.5762	20.9459	22.2653	20.6605	20.7716	21.3747	22.2599	22.0098	21.0433	24.9163	23.7805	22.5003	22.9828	9.32941	10.839	10.5408	10.485	10.0797	10.5494	12.9222	12.7335	12.5636	13.4838	13.2741	12.9039
KMW0325	3-Cyclohexen-1-ol, 1-methyl-4-(1-methylethyl)-	Terpenoids	C10H18O	586-82-3	dry, woody, musty	-	-	-	-	-	-	-	-	-	-	-	-	-	-	-	-	-	-	-	-	-	-	-	-	-	-	-	-	-	-	-	-	-	-	-	-	-
KMW0323	Benzyl alcohol	Alcohol	C7H8O	100-51-6	floral, rose, phenol, balsamic	0.1	4.09927	4.37622	4.24181	4.37162	4.65037	4.51142	3.83055	4.73363	4.11414	4.13909	3.88375	4.00819	4.45463	4.69135	4.72258	4.78168	4.91537	4.86648	4.58264	4.51444	5.24476	5.04075	5.03909	4.86967	1.71039	2.14197	1.99235	2.01591	1.8866	2.04218	2.37014	2.16415	2.19626	2.42236	2.32296	2.31186
KMW0316	(2R,4R)-4-Methyl-2-(2-methylprop-1-en-1-yl)tetrahydro-2H-pyran	Terpenoids	C10H18O	5258-11-7	flowery	3	0.00414402	0.00304622	0.00320223	0.00322918	0.00462564	0.00359621	0.00187999	0.00239315	0.00209912	0.00194096	0.00185739	0.00190448	0.00348445	0.00382254	0.00472343	0.00339721	0.00399113	0.00367285	0.00290001	0.0029217	0.00423646	0.00353023	0.00349913	0.00351597	0.00279815	0.0030936	0.00312842	0.00296296	0.00301592	0.00308389	0.00429363	0.00390556	0.00407352	0.00435486	0.00417911	0.00432064
KMW0315	2-Acetyl-3,4,5,6-tetrahydropyridine	Heterocyclic compound	C7H11NO	27300-27-2	roasted, caramel, bread	0.001	5.23576	5.58814	5.15685	5.47571	5.07549	4.89198	3.98382	4.58192	3.96376	4.36684	4.22311	3.60495	4.98158	5.65953	5.77652	7.20371	5.57819	5.65764	5.04268	5.52724	6.09719	5.72148	5.47769	6.24697	5.33426	4.6499	5.55109	6.64498	4.8973	6.22089	7.90013	7.01694	6.91155	7.62949	7.78812	7.45764
KMW0306	Undecane	Hydrocarbons	C11H24	1120-21-4	alkane	5.6	0.00233998	0.00255511	0.00229133	0.00223475	0.00228677	0.00233474	0.00220662	0.00223968	0.00204967	0.0021831	0.00206624	0.00215425	0.00201612	0.00225078	0.00202828	0.00198653	0.00201778	0.0021782	0.00240507	0.0025498	0.00283213	0.00238694	0.00230387	0.00251525	0.00286402	0.00287202	0.0026603	0.00290001	0.00254199	0.00271402	0.00201372	0.0020616	0.00214182	0.0021772	0.00191943	0.00196198
KMW0262	1-Nonen-3-one	Ketone	C9H16O	24415-26-7	pungent, mushroom	1e-06	9083.53	9273.48	6984.45	8696.12	9203.03	8432.11	8610.39	9371.44	7813.11	8833.77	9113.31	9860.81	10214.8	9262.17	10456.7	11150.1	10001.3	10784.4	8408.35	13422.1	11659.2	9126.52	9516.36	8571.5	11188.1	10378.4	10122.9	12274.2	11873.5	10846.8	9885.59	11503.8	11233.8	10254.1	12136.1	11524
KMW0298	cis-Rose oxide	Terpenoids	C10H18O	876-17-5	floral	0.0001	81.9217	76.8604	80.8962	81.5814	82.8569	78.4626	68.0356	73.5266	71.1033	72.3987	72.3346	60.588	78.4152	73.6866	65.9991	64.8226	67.6895	80.896	67.199	62.5921	85.4463	75.9154	61.9984	65.2206	31.1484	39.288	37.921	38.2043	37.6645	46.4521	40.4911	41.1267	38.0597	39.8258	40.6819	44.0292
KMW0293	2,4-Octadienal, (E,E)-	Aldehyde	C8H12O	30361-28-5	green, fatty, pear, melon, peel	0.14	0.0510463	0.0631041	0.0548286	0.0534803	0.0492858	0.0499858	0.0441198	0.0461746	0.038064	0.0399656	0.0439755	0.0420518	0.0316967	0.0293491	0.034135	0.028929	0.0338451	0.0322972	0.028896	0.0239635	0.0260017	0.0275629	0.0250431	0.0271047	0.0168738	0.0157493	0.012954	0.0126787	0.0177112	0.0142752	0.0106243	0.0112275	0.0100633	0.0166123	0.015668	0.0161336
KMW0291	Linalool	Terpenoids	C10H18O	78-70-6	floral, green	0.006	12.5251	11.9694	12.3833	11.9352	12.5509	11.7567	11.0973	12.6125	11.3657	11.0616	10.7758	10.7813	8.07754	8.31066	8.07047	8.11129	8.72565	9.29878	8.81586	7.96558	9.5395	9.41413	9.07785	8.65392	8.1301	9.54343	9.03056	9.11238	9.1056	9.33335	14.1805	13.7585	12.4896	14.9693	14.8671	14.8989
KMW0287	(Z,Z)-3,6-Nonadienal	Aldehyde	C9H14O	21944-83-2	fatty, soapy, cucumber	5e-05	3297.03	3385.22	3255.72	3224.6	3362.45	3291.16	3078.62	3608.7	3063.13	3158.1	3003.01	3051.92	2090.42	2156.84	2144.39	2176.47	2286.39	2353.32	2303.54	2296.63	2505.25	2499.33	2389.25	2330.35	2161.93	2421.08	2415.41	2429.67	2457.06	2364.29	3665.76	3593.67	3456.23	3968.88	3830.57	3979.8
KMW0284	Phenylethyl Alcohol	Alcohol	C8H10O	60-12-8	fruity, rose, sweet, apple	0.14	29.0596	32.0342	29.6851	31.3086	32.9996	31.5432	26.5108	31.5978	26.8111	27.0272	26.4862	26.7745	29.5661	31.0165	31.0714	31.949	32.3038	32.3509	27.4003	27.2901	30.87	29.9744	29.1633	29.1829	16.0881	19.1398	18.0782	18.0833	17.7087	18.5249	19.6122	18.3808	18.513	19.9466	19.4148	19.5074
KMW0283	Hexanoic acid, propyl ester	Ester	C9H18O2	626-77-7	sweet, fruity, juicy, pineapple, green, tropical	-	-	-	-	-	-	-	-	-	-	-	-	-	-	-	-	-	-	-	-	-	-	-	-	-	-	-	-	-	-	-	-	-	-	-	-	-
KMW0276	1-Octanol	Alcohol	C8H18O	111-87-5	intense citrus, rose	0.022	0.498084	0.479519	0.458486	0.549831	0.49516	0.496318	0.474618	0.528847	0.463393	0.557236	0.441171	0.601444	1.95131	0.367929	2.52827	0.483497	2.5281	2.26109	0.356206	0.25303	0.432471	0.3674	0.41391	0.378784	0.340379	0.358201	0.344976	0.416488	0.394466	0.388164	0.380837	0.344476	0.427725	0.468048	0.411717	0.448985
KMW0274	Maltol	Heterocyclic compound	C6H6O3	118-71-8	sweet, caramel	0.6	0.0508364	0.0540198	0.0442886	0.0600718	0.0319462	0.0490321	0.0388752	0.0583605	0.0219303	0.0400783	0.032099	0.0355814	0.0372367	0.0130642	0.0219388	0.0394248	0.0322568	0.0342203	0.0304327	0.0296446	0.0283555	0.0314195	0.0187644	0.0386559	0.0116288	0.0258338	0.0344696	0.0280613	0.011117	0.0192657	0.0147072	0.0373437	0.0380829	0.0302088	0.042221	0.0344116
KMW0382	Phenol, 2-methyl-	Phenol	C7H8O	95-48-7	phenol	0.0039	18.3748	18.7347	18.36	15.5328	14.952	17.2627	14.9114	17.223	15.0356	16.1261	15.5168	14.3292	28.7291	30.4627	22.948	28.6078	21.6663	31.5764	27.1201	11.2986	32.0328	30.6273	27.0674	27.8444	21.2483	25.8164	24.3388	24.3811	24.2335	24.0851	26.4789	25.6848	25.2758	27.7936	27.7526	26.7843
KMW0399	Decanal	Aldehyde	C10H20O	112-31-2	sweet, aldehydic, waxy, orange peel, citrus, floral	0.0001	174.232	156.896	154.796	161.879	162.238	178.225	154.061	177.623	159.462	179.839	168.666	169.063	169.336	175.473	171.22	156.431	174.973	165.77	169.244	162.492	176.19	172.69	181.956	161.698	166.546	148.835	157.044	176.583	172.295	147.833	144.125	156.202	163.04	164.626	155.518	140.774
KMW0404	Naphthalene	Aromatics	C10H8	91-20-3	pungent, dry, tarry	0.05	75.7544	77.8897	72.8612	76.8345	77.0082	73.6006	63.687	68.8311	60.6934	63.2134	58.1131	62.1797	33.5656	35.0339	38.2486	38.3616	36.4926	38.3067	52.9631	56.7062	63.5921	58.5407	57.1222	57.016	11.2674	12.5963	12.2963	12.6112	12.2357	12.6008	12.3985	11.7831	11.4666	12.2197	11.8088	12.3032
KMW0406	Dodecane	Hydrocarbons	C12H26	112-40-3	alkane	10	0.00740002	0.00790783	0.00729799	0.00680349	0.00730624	0.00706213	0.00656757	0.0070992	0.00641063	0.00654257	0.00655755	0.00695734	0.00647409	0.00720331	0.00624992	0.00618051	0.0069153	0.00718392	0.00690994	0.00683386	0.0074787	0.00743766	0.00704292	0.00684524	0.00631094	0.00722463	0.00693429	0.00667372	0.00700119	0.00703644	0.00750353	0.00735521	0.00744828	0.00761637	0.00763811	0.00745171
KMW0488	Tridecane	Hydrocarbons	C13H28	629-50-5	alkane	0.042	0.195375	0.253226	0.213333	0.2969	0.24825	0.280409	0.271751	0.348369	0.286798	0.314987	0.294962	0.161317	0.308063	0.279865	0.339272	0.308658	0.306523	0.195812	0.320357	0.173753	0.35763	0.17187	0.337495	0.309093	0.258918	0.251191	0.303971	0.223571	0.308744	0.23693	0.217287	0.353888	0.336839	0.332357	0.452382	0.488493
KMW0483	Undecanal	Aldehyde	C11H22O	112-44-7	waxy, soapy, floral, aldehydic, citrus, green, fatty, fresh	12.5	0.000737512	0.000845165	0.000716192	0.000847918	0.000872598	0.000918438	0.000789262	0.000844096	0.000768537	0.00082219	0.000714976	0.000664649	0.000680828	0.000586402	0.000601225	0.000602021	0.000702546	0.000535188	0.000729348	0.000694133	0.000655795	0.000784313	0.000580274	0.000643934	0.000715754	0.000619276	0.00060973	0.000566574	0.000669851	0.00058958	0.000679751	0.000686293	0.000786126	0.000867616	0.000712389	0.000834927
KMW0474	2-Undecanone	Ketone	C11H22O	112-12-9	waxy, fruity, creamy, fatty, orris, floral	0.0062	8.60009	9.59739	8.20138	9.12222	9.61059	9.79116	8.39598	8.52312	7.70743	8.59817	8.56994	8.6628	8.30705	8.78349	8.49565	9.37493	9.33911	8.8299	8.04054	7.93728	14.5228	8.26082	8.60662	9.29706	4.15366	4.92957	4.84786	4.55077	4.69706	4.68341	5.00388	4.81833	5.03735	5.06053	4.90346	4.77928
KMW0473	4-Isopropylcyclohexa-1,3-dienecarbaldehyde	Aldehyde	C10H14O	1197-15-5	fatty, spicy	-	-	-	-	-	-	-	-	-	-	-	-	-	-	-	-	-	-	-	-	-	-	-	-	-	-	-	-	-	-	-	-	-	-	-	-	-
KMW0462	Benzoic acid	Acid	C7H6O2	65-85-0	faint, balsamic, urine	0.568	0.107404	0.114001	0.10381	0.115208	0.112513	0.108184	0.127268	0.142132	0.127744	0.132833	0.127659	0.125387	0.0671764	0.0629613	0.0770675	0.0795993	0.0738381	0.0723413	0.0865849	0.110181	0.111623	0.0982719	0.0984088	0.103395	0.0403736	0.0489682	0.0482888	0.0471212	0.0461092	0.0453809	0.0712785	0.066835	0.0658806	0.0720393	0.0714291	0.0717853
KMW0456	1-Decanol	Alcohol	C10H22O	112-30-1	fatty, waxy, floral, orange, sweet, watery	0.023	1.84995	2.01755	1.69297	1.91683	1.56738	2.36988	2.06578	2.23527	1.54845	1.67919	1.80408	1.892	0.88937	1.45666	1.08267	1.95297	1.20002	1.2661	1.36402	2.05249	2.38185	1.34139	1.97966	1.86389	1.48326	1.75026	1.77559	1.62764	1.72435	1.9173	1.76677	1.97861	2.22096	1.98128	2.05674	1.9817
KMW0454	1-Cyclohexene-1-carboxaldehyde, 4-(1-methylethenyl)-	Aldehyde	C10H14O	2111-75-3	fresh, green, herbal, grassy, sweet, minty, cumin	0.03	0.538619	0.677572	0.59565	0.514414	0.525394	0.6919	0.608221	0.509129	0.436365	0.593593	0.406537	0.536587	0.676454	0.470979	0.452461	0.6988	0.586196	0.673208	0.466806	0.626273	0.563633	0.416255	0.517292	0.526387	0.503661	0.569881	0.544646	0.3995	0.523024	0.433639	0.421867	0.540866	0.637499	0.535321	0.636195	0.609922
KMW0453	Linalyl acetate	Terpenoids	C12H20O2	115-95-7	sweet, green, citrus, bergamot, lavender, woody	1	0.034957	0.0391519	0.0409278	0.0458729	0.0456235	0.0483853	0.0542545	0.0658203	0.0571793	0.0633569	0.0571754	0.0635866	0.0349088	0.0320285	0.0341806	0.0408144	0.0398186	0.0394024	0.0561587	0.0652446	0.0893717	0.0681608	0.0702456	0.0717457	0.0624245	0.0708437	0.0711075	0.0749783	0.0664813	0.0741646	0.0536612	0.0552486	0.0601407	0.059364	0.0586477	0.059435
KMW0451	5-Thiazoleethanol, 4-methyl-	Heterocyclic compound	C6H9NOS	137-00-8	fatty, cooked, beefy, juice	0.1	0.325716	0.407037	0.390935	0.357862	0.364786	0.403355	0.357675	0.43807	0.382657	0.395535	0.413032	0.371927	0.379751	0.419874	0.431978	0.321756	0.405763	0.36304	0.390369	0.374494	0.289622	0.364543	0.352854	0.334149	0.353171	0.407896	0.440951	0.385049	0.425109	0.398648	0.38966	0.451807	0.50809	0.477879	0.480263	0.478798
KMW0442	3-Phenylpropanol	Alcohol	C9H12O	122-97-4	sweet, spicy, cinnamyl, mignonette, hyacinth, balsamic	0.42	0.012741	0.0144963	0.0133947	0.00983765	0.00645441	0.0110584	0.0143552	0.0100775	0.0129424	0.0121777	0.0125973	0.0133135	0.0100135	0.0111303	0.00407551	0.00408596	0.00608452	0.00970094	0.0114176	0.00666397	0.00880714	0.011599	0.00999643	0.011636	0.0116892	0.0155794	0.0119706	0.0149306	0.0128026	0.0162043	0.0113392	0.0114422	0.00982742	0.0108689	0.0123346	0.0104926
KMW0434	1-Cyclohexene-1-carboxaldehyde, 2,6,6-trimethyl-	Terpenoids	C10H16O	432-25-7	tropical, saffron, herbal, clean, rose, sweet, tobacco, damascone, fruity	0.003	5.18566	5.77049	5.30273	6.46834	6.48584	6.18888	5.59381	6.37491	5.1881	4.89679	4.64124	5.54006	3.78289	4.14278	4.63501	4.83963	4.59449	5.17943	4.48005	5.0755	7.11287	5.28215	5.17683	5.72019	3.1953	4.07132	3.2914	2.30893	3.31272	3.76625	4.15329	3.34416	4.45277	3.75319	4.45668	2.84438
KMW0432	Neral	Terpenoids	C10H16O	106-26-3	sweet, citral, lemon, peel	1	1.46672	1.51167	1.50705	1.44074	1.42734	1.45277	1.50878	1.6984	1.49688	1.56482	1.51711	1.51548	1.51442	1.54732	1.54458	1.53067	1.5178	1.57222	1.48356	1.41509	1.62533	1.54591	1.44625	1.46286	1.41687	1.52977	1.45097	1.45264	1.56806	1.4419	1.34165	1.37032	1.3488	1.42071	1.44703	1.39603
KMW0426	Benzonitrile	Nitrogen compounds	C7H5N	100-47-0	almond	910	3.08036e-05	3.00328e-05	2.87539e-05	2.81544e-05	2.70155e-05	2.68035e-05	2.4768e-05	2.53803e-05	2.347e-05	2.39616e-05	2.32656e-05	2.41998e-05	2.14653e-05	2.2885e-05	2.32615e-05	2.27507e-05	2.34969e-05	2.53784e-05	2.25921e-05	2.2573e-05	2.59324e-05	2.46003e-05	2.2958e-05	2.24038e-05	1.48291e-05	1.76245e-05	1.69038e-05	1.9064e-05	1.76379e-05	1.86182e-05	2.11769e-05	1.79845e-05	1.70738e-05	2.06321e-05	1.85805e-05	2.0591e-05
KMW0425	Benzothiazole	Heterocyclic compound	C7H5NS	95-16-9	meaty, vegetable, brown, cooked, beefy, coffee	0.08	0.154697	0.166726	0.165089	0.165345	0.208629	0.211028	0.15529	0.183487	0.153832	0.156473	0.147838	0.168706	0.149883	0.152278	0.196417	0.249597	0.184509	0.168479	0.146983	0.205395	0.284792	0.183286	0.205505	0.22195	0.145481	0.157394	0.135738	0.149387	0.136994	0.141091	0.157952	0.141733	0.159864	0.159939	0.147422	0.167653
KMW0423	2(3H)-Furanone, 5-butyldihydro-	Ester	C8H14O2	104-50-7	sweet, coconut, waxy, creamy, tonka, dairy, fatty	0.0179	1.06805	1.17918	1.12976	1.03222	1.02024	1.03967	0.893997	0.869226	0.850851	0.899735	0.88781	0.917357	0.902972	0.972773	0.907958	0.860923	1.05032	0.969131	1.12157	1.33822	1.15425	1.07119	1.11699	1.04193	0.536587	0.628378	0.575415	0.62199	0.583173	0.520011	0.697231	0.765807	0.843693	0.816173	0.826598	0.822235
KMW0420	2-Cyclohexen-1-ol, 3-methyl-6-(1-methylethyl)-, trans-	Terpenoids	C10H18O	16721-39-4	herbal	-	-	-	-	-	-	-	-	-	-	-	-	-	-	-	-	-	-	-	-	-	-	-	-	-	-	-	-	-	-	-	-	-	-	-	-	-
KMW0418	(1R)-(-)-Myrtenal	Aldehyde	C10H14O	18486-69-6	sweet, cinnamon, tonka, spicy, terpene, camphor, jammy	-	-	-	-	-	-	-	-	-	-	-	-	-	-	-	-	-	-	-	-	-	-	-	-	-	-	-	-	-	-	-	-	-	-	-	-	-
KMW0411	1,6-Octadien-3-ol, 3,7-dimethyl-, formate	Ester	C11H18O2	115-99-1	citrus, herbal, bergamot, lavender, soapy, fatty, green, woody	-	-	-	-	-	-	-	-	-	-	-	-	-	-	-	-	-	-	-	-	-	-	-	-	-	-	-	-	-	-	-	-	-	-	-	-	-
KMW0494	Decanoic acid, methyl ester	Ester	C11H22O2	110-42-9	oily, wine, fruity, floral	0.0043	2.4452	3.12219	2.78746	2.79533	2.72512	2.86033	2.50232	3.20832	2.87728	3.03836	2.87599	2.87275	3.12577	3.14366	3.14251	2.70712	2.98438	2.85763	2.76071	2.79611	2.58376	3.04827	2.9974	2.80682	2.31901	2.63579	3.06311	2.8615	2.91718	2.77114	3.26937	3.62327	4.33939	4.04121	3.93979	3.9546
GMW0369	Spiro[5.5]undec-2-ene, 3,7,7-trimethyl-11-methylene-, (-)-	Terpenoids	C15H24	18431-82-8	-	-	-	-	-	-	-	-	-	-	-	-	-	-	-	-	-	-	-	-	-	-	-	-	-	-	-	-	-	-	-	-	-	-	-	-	-	-
KMW0113	2-Heptanone	Ketone	C7H14O	110-43-0	soapy	0.65	0.0143842	0.0155609	0.0156788	0.01495	0.0149075	0.0160765	0.0124219	0.0139089	0.0124737	0.0130986	0.010834	0.0125666	0.0114982	0.0107342	0.0100012	0.0120219	0.0114557	0.0106925	0.0116268	0.0119065	0.0115512	0.0121962	0.0117957	0.0112045	0.010373	0.0108305	0.0116793	0.0109146	0.012364	0.0117162	0.0135351	0.0146318	0.0128533	0.016214	0.0158261	0.0130097
KMW0112	o-Xylene	Aromatics	C8H10	95-47-6	geranium	7	0.00684278	0.00663846	0.00633186	0.00693528	0.00716066	0.00665695	0.00517514	0.00554485	0.004791	0.00512446	0.00508978	0.00499891	0.00481963	0.00491649	0.0048945	0.00451272	0.00456636	0.00480509	0.00586572	0.00490261	0.00631641	0.00488586	0.00519848	0.00490327	0.00486722	0.00523167	0.00476864	0.00471476	0.00467001	0.00473351	0.00436437	0.00456179	0.00448443	0.00453973	0.00439828	0.00463172
KMW0094	Butanoic acid, 3-methyl-, ethyl ester	Ester	C7H14O2	108-64-5	strawberry, candy, fruity	0.0001	88.674	87.7769	80.1652	78.8548	124.196	90.1565	84.9961	78.4808	73.2245	81.8717	84.3581	81.7916	76.2298	86.8022	91.3578	74.3346	85.9225	72.5121	82.6115	75.0836	71.9706	73.5422	92.8578	85.2679	71.9085	130.6	68.1462	68.8785	73.3239	162.317	148.982	74.4439	74.3839	69.4109	68.799	61.5168
GMW0406	4-Hydroxy-β-damascone	Ketone	C13H20O2	102488-09-5	-	-	-	-	-	-	-	-	-	-	-	-	-	-	-	-	-	-	-	-	-	-	-	-	-	-	-	-	-	-	-	-	-	-	-	-	-	-
GMW0400	Allyl nonanoate	Ester	C12H22O2	7493-72-3	sweet, waxy, fruity, wine, creamy, vinegar, pineapple	-	-	-	-	-	-	-	-	-	-	-	-	-	-	-	-	-	-	-	-	-	-	-	-	-	-	-	-	-	-	-	-	-	-	-	-	-
GMW0393	(1R,3aS,5aS,8aR)-1,3a,5a-Trimethyl-4-methylenedecahydrocyclopenta[c]pentalene	Terpenoids	C15H24	71596-72-0	-	-	-	-	-	-	-	-	-	-	-	-	-	-	-	-	-	-	-	-	-	-	-	-	-	-	-	-	-	-	-	-	-	-	-	-	-	-
GMW0392	.beta.-Longipinene	Terpenoids	C15H24	41432-70-6	-	-	-	-	-	-	-	-	-	-	-	-	-	-	-	-	-	-	-	-	-	-	-	-	-	-	-	-	-	-	-	-	-	-	-	-	-	-
GMW0349	Safrole	Heterocyclic compound	C10H10O2	94-59-7	sweet, warm, spicy, woody, floral, sassafrass, anisic	0.1	0.0597554	0.0476135	0.0478755	0.041604	0.0481704	0.0431038	0.0519673	0.0588821	0.0392888	0.051099	0.0583196	0.0577266	0.074366	0.0802589	0.0747951	0.0812182	0.064132	0.074178	0.0984548	0.0755986	0.105563	0.0991572	0.0927414	0.0929593	0.0938802	0.125037	0.119395	0.124069	0.115233	0.120674	0.103912	0.101069	0.112032	0.12146	0.092808	0.117447
KMW0251	5-Heptenal, 2,6-dimethyl-	Aldehyde	C9H16O	106-72-9	fresh, ozonous, melon, fresh air, sweet, green	0.016	1.51684	1.54415	1.54053	1.65581	1.52167	1.52401	0.643546	0.761378	0.58832	0.657693	0.576048	0.560921	1.3359	1.23695	1.29952	1.54346	1.50355	1.38257	0.719387	0.720381	0.835485	0.749899	0.785068	0.755576	0.696599	0.764713	0.766475	0.751813	0.771501	0.835987	1.07475	0.986588	0.944342	0.987536	1.17227	1.1327
GMW0341	Bicyclo[3.1.1]heptane, 2,6,6-trimethyl-, (1.alpha.,2.beta.,5.alpha.)-	Terpenoids	C10H18	6876-13-7	fresh, pine, balsamic, herbal	-	-	-	-	-	-	-	-	-	-	-	-	-	-	-	-	-	-	-	-	-	-	-	-	-	-	-	-	-	-	-	-	-	-	-	-	-
GMW0310	Bicyclo[7.2.0]undec-4-ene, 4,11,11-trimethyl-8-methylene-	Hydrocarbons	C15H24	13877-93-5	sweet, woody, spice, clove, dry	-	-	-	-	-	-	-	-	-	-	-	-	-	-	-	-	-	-	-	-	-	-	-	-	-	-	-	-	-	-	-	-	-	-	-	-	-
GMW0279	Benzoic acid, 2-amino-, 2-phenylethyl ester	Ester	C15H15NO2	133-18-6	sweet, floral, rose, grape, orange, iris, honey	-	-	-	-	-	-	-	-	-	-	-	-	-	-	-	-	-	-	-	-	-	-	-	-	-	-	-	-	-	-	-	-	-	-	-	-	-
GMW0278	2-Heptanol, 2,6-dimethyl-	Alcohol	C9H20O	13254-34-7	fresh, floral, woody, citrus, herbal	-	-	-	-	-	-	-	-	-	-	-	-	-	-	-	-	-	-	-	-	-	-	-	-	-	-	-	-	-	-	-	-	-	-	-	-	-
GMW0271	9-Decen-1-ol	Alcohol	C10H20O	13019-22-2	dewy, rose, waxy, fresh, clean, aldehydic	-	-	-	-	-	-	-	-	-	-	-	-	-	-	-	-	-	-	-	-	-	-	-	-	-	-	-	-	-	-	-	-	-	-	-	-	-
GMW0267	Bicyclo[3.1.1]hept-2-ene-2-ethanol, 6,6-dimethyl-	Alcohol	C11H18O	128-50-7	sweet, balsamic, citrus, pine, herbal	-	-	-	-	-	-	-	-	-	-	-	-	-	-	-	-	-	-	-	-	-	-	-	-	-	-	-	-	-	-	-	-	-	-	-	-	-
GMW0266	α-isomethyl ionone	Terpenoids	C14H22O	127-51-5	floral, fruity, powdery, violet, woody, tea	0.01	0.277522	0.290277	0.26974	0.288812	0.29288	0.285766	0.255513	0.278046	1.28601	0.261704	0.254584	1.57704	3.57644	4.45949	3.39897	4.08674	3.51203	3.85948	6.70696	7.63296	10.2945	7.53284	7.67161	8.04438	17.0133	18.28	16.7396	18.6514	17.4487	17.4558	19.7154	19.5721	20.3282	20.1255	19.0339	19.7152
KMW0115	Styrene	Aromatics	C8H8	100-42-5	penetrating, balsamic, gasoline	0.0036	9.83289	10.2837	9.3354	11.1938	10.6738	9.93743	7.27574	7.84268	6.8697	7.05785	6.76754	6.90635	6.47324	6.80187	6.65738	6.41524	6.18202	7.43354	7.70946	7.74403	8.02675	7.94322	7.89717	7.79449	9.04701	9.29317	8.94487	8.63865	8.57171	8.62998	8.19781	8.41484	8.18417	8.70906	8.61893	8.72435
KMW0131	Pentanoic acid	Acid	C5H10O2	109-52-4	sickening, putrid, acid, sweaty, rancid	0.00015	859.96	894.857	796.737	842.011	847.856	768.722	516.086	537.022	478.693	513.105	502.284	476.231	371.558	364.991	569.475	525.152	416.623	385.787	821.874	858.214	770.483	811.25	968.97	735.848	1471.05	1475.04	1571.08	1388.01	1362.03	1427.33	870.624	916.676	877.15	958.375	977.341	949.8
KMW0132	Pyrazine, 2,3-dimethyl-	Heterocyclic compound	C6H8N2	5910-89-4	nutty, nut skin, cocoa, peanut, buttery, coffee, walnut, caramel, roasted	0.1	0.20484	0.177844	0.176853	0.166524	0.18788	0.195964	0.160697	0.186044	0.157958	0.166934	0.147113	0.159873	0.118422	0.126145	0.141985	0.113797	0.112084	0.128944	0.0953973	0.098364	0.086259	0.103004	0.0738384	0.113422	0.037929	0.0391871	0.0524189	0.035552	0.0459108	0.0361902	0.044932	0.0437872	0.0528874	0.0569369	0.0516831	0.0505217
KMW0249	7,8-DIHYDROLINALOOL	Terpenoids	C10H20O	18479-49-7	woody, citrus, camphor	-	-	-	-	-	-	-	-	-	-	-	-	-	-	-	-	-	-	-	-	-	-	-	-	-	-	-	-	-	-	-	-	-	-	-	-	-
KMW0240	Ethanone, 1-(1H-pyrrol-2-yl)-	Heterocyclic compound	C6H7NO	1072-83-9	musty, nut skin, maraschino, cherry, coumarin, licorice, walnut, bread	170	0.00056251	0.00066585	0.000591053	0.000611923	0.000680022	0.000617435	0.000486472	0.000561935	0.000509641	0.000513348	0.000496415	0.000504861	0.000568578	0.000601974	0.000593618	0.000633218	0.000645392	0.000629635	0.000605182	0.000555592	0.000786339	0.000622497	0.000601037	0.000643565	0.000462022	0.00057387	0.000587579	0.00052111	0.000523551	0.000545117	0.000581974	0.000527088	0.00054493	0.000594797	0.000568759	0.00051277
KMW0231	Furaneol	Ketone	C6H8O3	3658-77-3	sweet, cotton, candy, caramel, strawberry, sugar	0.001	783.786	813.588	835.752	786.433	820.519	800.188	730.224	875.489	760.868	784.856	737.254	753.703	772.09	789.665	807.661	820.545	799.652	817.329	815.63	775.557	900.618	888.096	845.28	826.718	689.929	801.904	759.679	772.391	765.65	756.429	701.057	680.087	658.634	726.137	712.185	695.337
KMW0219	1-Hexanol, 2-ethyl-	Alcohol	C8H18O	104-76-7	citrus, fresh, floral, oily, sweet	1.28	0.00698561	0.00948556	0.00938127	0.00909192	0.00928943	0.00908043	0.00722558	0.00910478	0.0098007	0.00553004	0.00627053	0.00732214	0.00431391	0.00909087	0.00662286	0.00795143	0.00859705	0.00873555	0.00753396	0.00499732	0.00768503	0.00663589	0.0066411	0.00666492	0.00852586	0.00582124	0.00697609	0.00598861	0.00820996	0.00654195	0.00684002	0.0079053	0.00306889	0.00404927	0.00409787	0.00790199
KMW0214	Acetylpyrazine	Heterocyclic compound	C6H6N2O	22047-25-2	popcorn, nutty, corn, chip, bread, crust, chocolate, hazelnut, coffee	0.01	1.85572	1.75594	1.49288	1.78614	1.73702	1.68744	1.54132	1.55223	1.57614	1.5508	1.21573	1.49923	1.31371	1.30267	1.17652	1.42538	1.20566	1.22846	1.33185	1.47511	2.34596	1.46227	1.52252	1.64427	1.04794	1.1549	0.983883	1.14515	1.02498	1.11345	1.02772	1.00823	1.00492	0.984792	0.944666	1.10206
KMW0212	Benzeneacetaldehyde	Aldehyde	C8H8O	122-78-1	floral, honey, rose, cherry	0.0063	23.7935	24.8829	24.1569	24.2992	24.3028	23.7587	22.045	25.3499	21.1648	21.9045	20.9274	21.144	28.2799	30.1471	29.6454	30.0034	30.1647	31.624	17.8524	17.6088	19.6958	19.4196	18.1828	17.4498	16.6253	17.5262	18.7927	18.4921	18.002	17.315	16.6413	15.8927	15.5571	17.5238	16.926	16.8429
KMW0205	Cyclohexene, 1-methoxy-	Ether	C7H12O	931-57-7	herbal, spice	-	-	-	-	-	-	-	-	-	-	-	-	-	-	-	-	-	-	-	-	-	-	-	-	-	-	-	-	-	-	-	-	-	-	-	-	-
KMW0203	Ethanone, 1-(2-pyridinyl)-	Ketone	C7H7NO	1122-62-9	popcorn, heavy, corn, chip, fatty, tobacco	0.1	0.221553	0.197627	0.169396	0.155933	0.213416	0.202657	0.166137	0.16243	0.179642	0.162969	0.148666	0.173064	0.179321	0.203013	0.194014	0.193978	0.18017	0.192613	0.247018	0.23025	0.259805	0.198725	0.231846	0.212654	0.146781	0.188381	0.146495	0.157342	0.126183	0.137038	0.14841	0.183483	0.177059	0.156863	0.190985	0.16669
KMW0188	2-Methyl-1,3-dithiacyclopentane	Heterocyclic compound	C4H8S2	5616-51-3	sulfury, alliaceous, smoky, savory, vegetable	0.02	1.6278	1.63321	1.44575	1.5208	1.49248	1.44893	0.985247	0.906428	0.885544	0.896397	0.829664	0.917632	1.53557	1.59098	1.54225	1.57361	1.59737	1.76639	2.15528	2.19007	2.65192	2.42762	2.24347	2.27349	1.96106	2.05966	2.03065	2.05842	2.01133	2.01853	2.94028	2.90601	2.79414	3.10793	2.89076	3.04751
KMW0187	2-Octanone	Ketone	C8H16O	111-13-7	earthy, weedy, natural, woody, herbal	0.06	0.0492368	0.0667444	0.065583	0.0461734	0.0851055	0.0769043	0.0646384	0.0650817	0.0510142	0.062551	0.0487687	0.0649595	0.0534732	0.068638	0.0530665	0.038216	0.0671622	0.0480869	0.0652317	0.0716676	0.0644256	0.0737436	0.0700346	0.089824	0.0679771	0.0968121	0.072652	0.0801682	0.0535628	0.0676383	0.0807726	0.053875	0.0789627	0.0539395	0.0624307	0.0486501
KMW0181	2,3-Dehydro-1,8-cineole	Terpenoids	C10H16O	92760-25-3	minty, lemon	-	-	-	-	-	-	-	-	-	-	-	-	-	-	-	-	-	-	-	-	-	-	-	-	-	-	-	-	-	-	-	-	-	-	-	-	-
KMW0178	Bicyclo[3.1.0]hexane, 4-methylene-1-(1-methylethyl)-	Terpenoids	C10H16	3387-41-5	woody, terpene, citrus, pine, spice	0.98	0.0302651	0.0285371	0.0260064	0.0213524	0.0436659	0.0251822	0.015387	0.0145599	0.0080717	0.0117356	0.015222	0.0144342	0.0180629	0.0229194	0.0195742	0.0204368	0.0228971	0.0191775	0.0194922	0.0168951	0.0176222	0.0188034	0.0132871	0.0148091	0.0140078	0.0138015	0.0113367	0.0109672	0.0113894	0.0120591	0.0125742	0.0128271	0.0145099	0.0120987	0.0134359	0.0136663
KMW0175	Phenol	Phenol	C6H6O	108-95-2	phenol, medicinal	0.03	3.97504	4.28971	4.09811	6.00457	3.22245	1.38732	3.57163	3.86669	3.76464	3.88678	3.75861	3.48699	4.12843	4.45847	3.06482	1.39443	2.71437	4.19275	4.03593	1.41436	2.97622	4.30712	3.86626	1.65818	3.72998	4.50877	4.23918	4.20074	4.34946	4.26331	3.46483	3.44155	3.36691	3.73244	3.64239	3.47102
KMW0173	1-Octen-3-ol	Alcohol	C8H16O	3391-86-4	fatty, fruity, grassy, mushroom, perfumy, sweet	0.001	3.59043	3.31655	4.12661	4.17204	2.78179	5.01698	0.30202	0.328655	0.304017	0.309338	0.300922	0.305583	2.48876	2.20882	3.36745	3.19964	2.95442	2.80956	1.96888	3.23445	3.72688	2.92745	3.38906	2.51983	1.64128	2.20066	2.00034	2.44134	2.2241	1.93458	2.96481	2.80381	2.57389	3.61172	3.19865	2.6253
KMW0161	3-Octanone	Ketone	C8H16O	106-68-3	fresh, herbal, lavender, sweet, mushroom	0.0013	74.5031	76.3901	77.5971	79.9274	79.3633	79.1974	47.79	54.3587	47.5443	50.5678	41.7507	46.701	70.5752	72.7711	74.9673	75.4212	78.3749	81.3924	63.9924	63.1541	67.4131	66.0448	67.0502	65.6388	60.1412	50.9541	52.5864	48.3271	62.4415	53.1388	60.5865	60.131	61.6013	66.925	71.0953	69.1261
KMW0158	Benzaldehyde	Aldehyde	C7H6O	100-52-7	sweet, bitter, almond, cherry	0.35	3.00843	3.0567	2.949	3.06425	3.01163	2.95433	2.21379	2.60435	2.14613	2.27082	2.13678	2.22008	2.91674	2.95131	3.09297	3.16442	3.15655	3.35195	2.31027	2.35625	2.31666	2.51371	2.41632	2.35329	2.41729	2.61614	2.68939	2.70936	2.64356	2.61636	2.50806	2.4431	2.34128	2.60561	2.65822	2.6496
KMW0150	Benzene, 1,2,4-trimethyl-	Aromatics	C9H12	95-63-6	plastic	0.26	0.100659	0.0969566	0.0824464	0.0979813	0.0875238	0.0825284	0.0879207	0.077336	0.0801698	0.087567	0.0700234	0.0880015	0.0817391	0.0829918	0.0788681	0.0921657	0.0744935	0.0756452	0.0975775	0.0937565	0.104673	0.112679	0.0905828	0.0883158	0.100311	0.0972132	0.111038	0.119102	0.100202	0.121052	0.129618	0.0902666	0.0994151	0.104139	0.0995482	0.0941452
KMW0147	Pyridine, 2-ethyl-	Heterocyclic compound	C7H9N	100-71-0	green, grassy	0.057	0.30985	0.274925	0.2903	0.164511	0.226052	0.168605	0.211406	0.132975	0.302911	0.166033	0.18144	0.158616	0.11286	0.247031	0.140123	0.111796	0.152804	0.129292	0.126556	0.0888848	0.13051	0.0969101	0.126735	0.10717	0.0872711	0.240826	0.106021	0.147837	0.0836003	0.193064	0.111418	0.114281	0.0993024	0.116252	0.0970328	0.128496
KMW0140	Thiazole, 4,5-dimethyl-	Heterocyclic compound	C5H7NS	3581-91-7	roasted, nutty, fishy, green, boiled, shrimp	0.47	0.0899728	0.0845944	0.0786928	0.0962782	0.126621	0.108262	0.0734738	0.0912185	0.066142	0.0742641	0.0698132	0.0659007	0.0599418	0.0651185	0.0755356	0.0718479	0.0917124	0.0619569	0.0633021	0.0696593	0.0977368	0.0730838	0.0934324	0.0867924	0.0696481	0.0954554	0.0839742	0.0835585	0.0740219	0.0897946	0.14896	0.129023	0.114053	0.137366	0.133115	0.135184
KMW0492	2(3H)-Furanone, 5-ethyldihydro-	Ester	C6H10O2	695-06-7	sweet, caramel	0.26	0.132858	0.138798	0.118294	0.120939	0.142549	0.134031	0.133346	0.130337	0.139434	0.140743	0.142732	0.139361	0.111649	0.145162	0.137905	0.101655	0.13037	0.119782	0.136416	0.128264	0.130729	0.138215	0.128478	0.128809	0.144876	0.155109	0.14643	0.143337	0.141769	0.143659	0.108737	0.121764	0.120681	0.120248	0.124796	0.121972
KMW0496	Hexanoic acid, 3-hydroxy-, ethyl ester	Ester	C8H16O3	2305-25-1	fruity, grape, burnt, woody, hay, spicy, pineapple, cranberry, dusty, woody	0.045	0.827565	0.9233	0.851945	0.879255	0.927718	0.859426	0.928944	0.925547	0.902535	0.923253	0.883842	0.908033	0.549122	0.559318	0.547925	0.567691	0.596687	0.560936	0.683332	0.674744	0.877056	0.716454	0.687208	0.700256	0.362378	0.399103	0.360049	0.376928	0.361837	0.367486	0.541026	0.516179	0.600312	0.587651	0.569373	0.589228
GMW0254	Benzenepropanol, propanoate	Ester	C12H16O2	122-74-7	floral, balsamic, hyacinth, mimosa	-	-	-	-	-	-	-	-	-	-	-	-	-	-	-	-	-	-	-	-	-	-	-	-	-	-	-	-	-	-	-	-	-	-	-	-	-
KMW0683	Heptadecane	Hydrocarbons	C17H36	629-78-7	alkane	10000	4.47545e-07	5.0979e-07	4.44506e-07	5.65717e-07	4.80365e-07	5.07734e-07	6.57609e-07	7.88929e-07	6.38097e-07	6.49827e-07	6.67531e-07	7.1036e-07	4.70662e-07	4.71598e-07	5.02844e-07	5.68017e-07	4.54277e-07	4.53982e-07	8.71146e-07	1.10504e-06	1.50889e-06	9.50948e-07	1.04477e-06	1.07047e-06	4.61932e-07	4.00291e-07	4.24541e-07	4.94255e-07	4.85133e-07	3.83307e-07	3.91328e-07	3.75562e-07	3.76565e-07	3.73767e-07	4.0606e-07	3.82418e-07
KMW0729	5-Hydroxymethylfurfural	Aldehyde	C6H6O3	67-47-0	fatty, buttery, musty, waxy, caramel	1000	2.46191e-05	2.63204e-05	2.39041e-05	3.34027e-05	2.57455e-05	3.42085e-05	2.44051e-05	3.29485e-05	2.22826e-05	2.4417e-05	2.32947e-05	2.40879e-05	2.05641e-05	1.88192e-05	2.47498e-05	2.5138e-05	1.84679e-05	1.99972e-05	2.09435e-05	2.56107e-05	2.41398e-05	2.39648e-05	2.06709e-05	2.19417e-05	1.23364e-05	1.45248e-05	1.50956e-05	1.65783e-05	1.48711e-05	1.72313e-05	1.77543e-05	1.89155e-05	1.87791e-05	1.93954e-05	1.83353e-05	1.82586e-05
KMW0726	1-Tetradecanol	Alcohol	C14H30O	112-72-1	fruity, waxy, orris, coconut	5	0.00188077	0.00295151	0.0024784	0.00257836	0.00293149	0.00331182	0.00306413	0.00372902	0.00224752	0.00277422	0.00220909	0.00333528	0.00257892	0.00217201	0.00258567	0.00282289	0.00271107	0.00220642	0.00308477	0.00511729	0.00688211	0.00423353	0.00537118	0.00524382	0.00251345	0.00305139	0.00222026	0.00307151	0.00333346	0.00200992	0.00239504	0.00223217	0.00160686	0.00180731	0.00159195	0.00117169
KMW0722	4-Vinylphenol	Phenol	C8H8O	2628-17-3	chemical, woody	0.01	2.75343	2.18944	2.28984	2.41933	2.44994	2.71592	1.96692	2.28325	2.12316	2.239	2.16769	2.46607	1.46698	1.83519	1.32591	1.56751	1.6541	1.81484	1.58648	1.75341	1.51403	1.67639	1.53467	1.63329	0.961824	0.905297	0.890892	0.815016	0.941302	0.936355	0.817511	0.926783	0.63945	0.917019	1.08351	0.89977
KMW0713	2,6,10-Dodecatrien-1-ol, 3,7,11-trimethyl-, acetate, (E,E)-	Terpenoids	C17H28O2	4128-17-0	oily, waxy	-	-	-	-	-	-	-	-	-	-	-	-	-	-	-	-	-	-	-	-	-	-	-	-	-	-	-	-	-	-	-	-	-	-	-	-	-
KMW0708	7-epi-a-Eudesmol	Terpenoids	C15H26O	123123-38-6	sweet, woody	-	-	-	-	-	-	-	-	-	-	-	-	-	-	-	-	-	-	-	-	-	-	-	-	-	-	-	-	-	-	-	-	-	-	-	-	-
KMW0706	1-Hexadecanol	Alcohol	C16H34O	36653-82-4	waxy, clean, greasy, floral, oily	1.1	0.0659578	0.0736439	0.0641823	0.0720516	0.0608087	0.064358	0.0610159	0.0714639	0.0516923	0.0535669	0.0544547	0.054764	0.0484879	0.0472263	0.0495235	0.0561814	0.0409191	0.043504	0.0436735	0.0475237	0.0610818	0.0482705	0.0481161	0.0565973	0.0402885	0.0322426	0.0311605	0.0449103	0.0432496	0.0362328	0.0375977	0.0347089	0.0303075	0.0305806	0.0329846	0.0305079
KMW0697	Hexadecanal	Aldehyde	C16H32O	629-80-1	cardboard	0.06	175.556	184.085	173.814	199.556	187.077	186.18	166.795	219.71	165.636	171.777	165.889	171.398	159.285	163.552	189.05	222.699	163.741	161.812	174.382	181.581	255.362	194.976	190.548	228.162	167.84	162.471	156.111	185.344	176.609	161.749	166.323	158.078	161.805	159.238	166.811	157.721
KMW0692	2-Pentadecanone, 6,10,14-trimethyl-	Terpenoids	C18H36O	502-69-2	oily, herbal, jasmin, celery, woody	-	-	-	-	-	-	-	-	-	-	-	-	-	-	-	-	-	-	-	-	-	-	-	-	-	-	-	-	-	-	-	-	-	-	-	-	-
KMW0684	.delta.-Dodecalactone	Ester	C12H22O2	713-95-1	peachy, oily, creamy, soapy	0.0076	0.474064	0.843972	0.791081	0.814891	0.994669	1.32809	1.20168	1.11391	1.10832	0.573957	0.689029	0.927508	1.52464	0.704186	1.19253	1.04112	0.99203	0.944016	0.0938373	0.0937345	0.096902	0.105336	0.103236	0.106649	1.18349	0.519362	0.940292	1.69856	1.16156	0.667581	1.26726	1.30626	1.36224	1.15737	1.5519	1.45521
KMW0681	2,6,11-Dodecatrienal, 2,6-dimethyl-10-methylene-	Terpenoids	C15H22O	60066-88-8	orange, sweet, fresh, waxy, juicy	-	-	-	-	-	-	-	-	-	-	-	-	-	-	-	-	-	-	-	-	-	-	-	-	-	-	-	-	-	-	-	-	-	-	-	-	-
KMW0671	(1R,4R)-1-methyl-4-(6-Methylhept-5-en-2-yl)cyclohex-2-enol	Terpenoids	C15H26O	58334-55-7	ginger, metallic	-	-	-	-	-	-	-	-	-	-	-	-	-	-	-	-	-	-	-	-	-	-	-	-	-	-	-	-	-	-	-	-	-	-	-	-	-
KMW0669	Pantolactone	Ester	C6H10O3	599-04-2	burnt, roasted bread	500	0.000226969	0.000223296	0.000206079	0.000217935	0.00020511	0.00020691	0.000246776	0.000254727	0.0002478	0.000255289	0.000234249	0.000227593	0.000163381	0.000163044	0.000162526	0.000145491	0.000152379	0.00016666	0.00018506	0.000172175	0.000188074	0.000192144	0.000157957	0.000152011	0.000109167	0.000123756	0.000122499	0.000128743	0.000118456	0.00012636	0.000191201	0.000191897	0.000161713	0.000208817	0.000198156	0.000196979
KMW0667	.tau.-Muurolol	Terpenoids	C15H26O	19912-62-0	herbal, spicy, honey	-	-	-	-	-	-	-	-	-	-	-	-	-	-	-	-	-	-	-	-	-	-	-	-	-	-	-	-	-	-	-	-	-	-	-	-	-
KMW0664	3-Cyclohexen-1-ol, 1-(1,5-dimethyl-4-hexenyl)-4-methyl-	Terpenoids	C15H26O	15352-77-9	citrus, floral, tangy, lemon, fresh, sweet, herbal	-	-	-	-	-	-	-	-	-	-	-	-	-	-	-	-	-	-	-	-	-	-	-	-	-	-	-	-	-	-	-	-	-	-	-	-	-
KMW0662	4-Oxo-β-ionone	Terpenoids	C13H18O2	29790-29-2	woody	-	-	-	-	-	-	-	-	-	-	-	-	-	-	-	-	-	-	-	-	-	-	-	-	-	-	-	-	-	-	-	-	-	-	-	-	-
KMW0660	2(3H)-Furanone, dihydro-5-(2-octenyl)-, (Z)-	Ester	C12H20O2	18679-18-0	sweet, fatty, waxy, dairy, creamy, fruity	0.0054	0.670159	0.626378	0.47762	0.605694	0.516177	0.501927	0.756579	0.475857	0.636538	0.751139	0.780721	0.66594	0.0865138	0.0897837	0.0909629	0.0890844	0.0902912	0.0891411	0.640047	0.616131	1.32869	0.827242	1.17026	0.620234	1.23222	1.51089	1.43467	1.46024	1.44592	1.57107	0.97217	1.16047	0.874031	0.915895	1.07943	0.987296
KMW0654	Methyl tetradecanoate	Ester	C15H30O2	124-10-7	fatty, waxy, petal	-	-	-	-	-	-	-	-	-	-	-	-	-	-	-	-	-	-	-	-	-	-	-	-	-	-	-	-	-	-	-	-	-	-	-	-	-
KMW0653	Pentanoic acid, 3,7-dimethyl-2,6-octadienyl ester, (E)-	Ester	C15H26O2	10402-47-8	rose, fruity, pineapple	-	-	-	-	-	-	-	-	-	-	-	-	-	-	-	-	-	-	-	-	-	-	-	-	-	-	-	-	-	-	-	-	-	-	-	-	-
KMW0734	Benzoic acid, 4-hydroxy-3-methoxy-, methyl ester	Ester	C9H10O4	3943-74-6	warm, spicy, vanilla, guaiacol, phenol, carnation	0.79	0.0210833	0.0223333	0.0206931	0.0275596	0.0248117	0.0268554	0.0225586	0.0254464	0.0220606	0.0220845	0.0229538	0.0220433	0.0254092	0.0249539	0.0271419	0.0322731	0.0284339	0.0279215	0.0276076	0.0329254	0.03708	0.0275856	0.0242872	0.034191	0.0405978	0.0427159	0.0423677	0.0459234	0.0393051	0.0428704	0.0483377	0.0471084	0.0461973	0.0468039	0.0443399	0.0415494
KMW0735	Benzoic acid, 4-hydroxy-3-methoxy-, ethyl ester	Ester	C10H12O4	617-05-0	flowery, fruity, sweet, vanilla	0.00058	16.1649	21.2538	17.5681	20.9838	21.3457	22.2038	17.4289	19.9891	16.3178	18.1772	20.2875	20.5971	18.3336	18.167	21.8722	19.3913	18.9338	15.538	18.0573	22.9969	30.8057	19.706	24.035	21.7608	25.163	27.0905	23.7601	31.4986	22.5155	23.2435	28.8553	29.2837	24.2238	31.4087	27.3754	26.257
KMW0736	Apocynin	Ketone	C9H10O3	498-02-2	faint, sweet, vanillin	0.78	0.00180668	0.000307458	0.000285705	0.00152953	0.00157533	0.00030268	0.00352552	0.00299054	0.0037264	0.00356063	0.00176742	0.00397282	0.00499325	0.00676071	0.00672399	0.00759189	0.00602086	0.00607973	0.010587	0.0134744	0.0162428	0.0116151	0.0115182	0.0125674	0.0234357	0.024245	0.0232945	0.0260407	0.0245495	0.0250206	0.0281051	0.0271335	0.0284344	0.0281632	0.0274652	0.0268909
KMW0737	2-Cyclohexen-1-one, 4-(3-hydroxy-1-butenyl)-3,5,5-trimethyl-	Ketone	C13H20O2	34318-21-3	spicy	-	-	-	-	-	-	-	-	-	-	-	-	-	-	-	-	-	-	-	-	-	-	-	-	-	-	-	-	-	-	-	-	-	-	-	-	-
NMW0100	Succinimide	Heterocyclic compound	C4H5NO2	123-56-8	amine, ammoniacal, piperidine	-	-	-	-	-	-	-	-	-	-	-	-	-	-	-	-	-	-	-	-	-	-	-	-	-	-	-	-	-	-	-	-	-	-	-	-	-
NMW0098	Arecoline	Heterocyclic compound	C8H13NO2	63-75-2	-	-	-	-	-	-	-	-	-	-	-	-	-	-	-	-	-	-	-	-	-	-	-	-	-	-	-	-	-	-	-	-	-	-	-	-	-	-
NMW0088	2-Ethylhexyl acrylate	Ester	C11H20O2	103-11-7	-	0.55	0.0372775	0.0461944	0.0465691	0.0362415	0.0465181	0.0472344	0.0417024	0.0477355	0.0435516	0.049228	0.0450883	0.0580812	0.0367382	0.0329512	0.0276679	0.0319275	0.0398306	0.0422274	0.0387541	0.0490835	0.0590747	0.0430827	0.0429104	0.0459576	0.00578257	0.00635815	0.00602698	0.00643504	0.00615234	0.00639495	0.058312	0.0523574	0.0579714	0.0635459	0.0582886	0.0634884
NMW0072	Cyclohexanol, 2-methyl-5-(1-methylethenyl)-, (1.alpha.,2.beta.,5.alpha.)-	Terpenoids	C10H18O	38049-26-2	-	-	-	-	-	-	-	-	-	-	-	-	-	-	-	-	-	-	-	-	-	-	-	-	-	-	-	-	-	-	-	-	-	-	-	-	-	-
NMW0058	Naphthalene, 1,2,3,4-tetrahydro-	Aromatics	C10H12	119-64-2	-	0.05	0.280423	0.290088	0.271543	0.284013	0.294486	0.252753	0.244669	0.281341	0.250417	0.265307	0.250488	0.252162	0.40327	0.403241	0.344886	0.323149	0.413733	0.42242	0.232416	0.181412	0.263232	0.247135	0.229622	0.226295	0.14243	0.169295	0.168895	0.143013	0.147378	0.136316	0.182967	0.175188	0.15019	0.147554	0.166921	0.166526
NMW0052	2-Methyl-6-methyleneocta-2,7-dien-4-one	Terpenoids	C10H14O	539-70-8	-	-	-	-	-	-	-	-	-	-	-	-	-	-	-	-	-	-	-	-	-	-	-	-	-	-	-	-	-	-	-	-	-	-	-	-	-	-
NMW0050	Benzyl nitrile	Nitrogen compounds	C8H7N	140-29-4	-	1.2	0.0158302	0.0183044	0.0154169	0.0151739	0.016566	0.0172605	0.0149247	0.0172104	0.0150637	0.0174073	0.0153597	0.0165837	0.0118473	0.0115747	0.012029	0.013209	0.0117067	0.0122029	0.00944032	0.00953382	0.00955046	0.00966469	0.00928997	0.0100877	0.00324479	0.00406626	0.00427741	0.00423501	0.00428402	0.00469182	0.00558285	0.00502757	0.00580536	0.0052695	0.00528715	0.00616428
NMW0042	Valproic Acid	Acid	C8H16O2	99-66-1	-	-	-	-	-	-	-	-	-	-	-	-	-	-	-	-	-	-	-	-	-	-	-	-	-	-	-	-	-	-	-	-	-	-	-	-	-	-
NMW0036	2-Pyrrolidinone, 1-ethenyl-	Ketone	C6H9NO	88-12-0	-	-	-	-	-	-	-	-	-	-	-	-	-	-	-	-	-	-	-	-	-	-	-	-	-	-	-	-	-	-	-	-	-	-	-	-	-	-
NMW0033	2(1H)-Pyridinone	Ketone	C5H5NO	142-08-5	-	-	-	-	-	-	-	-	-	-	-	-	-	-	-	-	-	-	-	-	-	-	-	-	-	-	-	-	-	-	-	-	-	-	-	-	-	-
NMW0031	Hygrine	Heterocyclic compound	C8H15NO	496-49-1	-	-	-	-	-	-	-	-	-	-	-	-	-	-	-	-	-	-	-	-	-	-	-	-	-	-	-	-	-	-	-	-	-	-	-	-	-	-
NMW0029	Formic acid, phenylmethyl ester	Ester	C8H8O2	104-57-4	floral, fruity, spicy, almond, cranberry, black currant, tea	168.54	5.18361e-05	4.82302e-05	4.48564e-05	3.97163e-05	3.81236e-05	3.1553e-05	3.75899e-05	3.01456e-05	4.30451e-05	3.98595e-05	3.76656e-05	3.17467e-05	2.64566e-05	2.40148e-05	3.18567e-05	2.92686e-05	2.35238e-05	2.7221e-05	2.33567e-05	3.62587e-05	1.75404e-05	2.48512e-05	2.31002e-05	2.30303e-05	1.11301e-05	1.7657e-05	9.654e-06	1.47071e-05	1.61369e-05	1.56545e-05	1.3517e-05	1.95551e-05	1.78608e-05	1.67394e-05	1.96482e-05	9.89409e-06
NMW0021	2-Pyridinemethanamine	Heterocyclic compound	C6H8N2	3731-51-9	-	-	-	-	-	-	-	-	-	-	-	-	-	-	-	-	-	-	-	-	-	-	-	-	-	-	-	-	-	-	-	-	-	-	-	-	-	-
NMW0019	1-Octanamine	Amine	C8H19N	111-86-4	-	2.64	0.0264071	0.0259503	0.0279501	0.0255723	0.0262776	0.0256956	0.0240988	0.0295827	0.0247395	0.0261225	0.024408	0.024756	0.0254584	0.0258955	0.0271567	0.0266247	0.0260684	0.026646	0.0252799	0.0243022	0.0252856	0.0272143	0.0260975	0.0250411	0.023499	0.0252383	0.0247041	0.0249234	0.0258204	0.0236223	0.0227371	0.0223913	0.0212315	0.0236052	0.0233853	0.0226457
NMW0011	Benzofuran	Heterocyclic compound	C8H6O	271-89-6	aromatic	0.048	0.0553885	0.11716	0.102691	0.0679109	0.102705	0.1008	0.0884901	0.0514967	0.0717638	0.0934552	0.0717947	0.0856177	0.0727723	0.0828171	0.0406895	0.0495439	0.0651778	0.0950859	0.116407	0.0954144	0.122273	0.112375	0.0538442	0.110646	0.120149	0.11972	0.154554	0.0839465	0.0900587	0.106623	0.0599896	0.118859	0.0890766	0.106864	0.133412	0.0826089
NMW0006	2-Cyclohexen-1-one, 3-methyl-6-(1-methylethylidene)-	Terpenoids	C10H14O	491-09-8	sharp, minty, phenol	-	-	-	-	-	-	-	-	-	-	-	-	-	-	-	-	-	-	-	-	-	-	-	-	-	-	-	-	-	-	-	-	-	-	-	-	-
NMW0004	1,2-Cyclohexanediol, 1-methyl-4-(1-methylethenyl)-	Terpenoids	C10H18O2	1946-00-5	cool, minty	-	-	-	-	-	-	-	-	-	-	-	-	-	-	-	-	-	-	-	-	-	-	-	-	-	-	-	-	-	-	-	-	-	-	-	-	-
NMW0003	2,6,9,11-Dodecatetraenal, 2,6,10-trimethyl-, (E,E,E)-	Terpenoids	C15H22O	17909-77-2	citrus, orange, powdery, aldehydic, juicy, mandarin, sour, candy, waxy	0.22	0.0452086	0.0547433	0.0538983	0.063489	0.0530509	0.0570899	0.058149	0.0676752	0.0549478	0.0597577	0.0595069	0.0562483	0.0573487	0.0561968	0.0686994	0.0706643	0.0552368	0.0544692	0.0656504	0.0776364	0.0945873	0.070046	0.0809905	0.0887701	0.0543006	0.0548683	0.0569648	0.073209	0.0603494	0.046941	0.0327591	0.0406476	0.0355874	0.0345468	0.0339718	0.0408368
KMW0646	Citronellyl valerate	Ester	C15H28O2	7540-53-6	rose, herbal, honey	-	-	-	-	-	-	-	-	-	-	-	-	-	-	-	-	-	-	-	-	-	-	-	-	-	-	-	-	-	-	-	-	-	-	-	-	-
KMW0640	Tetradecanal	Aldehyde	C14H28O	124-25-4	fatty, waxy, amber, incense, dry, citrus, peel, musky	0.06	0.300114	0.393266	0.328393	0.435833	0.419577	0.41754	0.368989	0.440575	0.367492	0.401529	0.384508	0.474464	0.461123	0.447882	0.511496	0.594339	0.502147	0.489484	0.489229	0.656658	0.78571	0.509869	0.565538	0.609715	0.971796	1.10142	1.04338	1.14951	1.12628	1.05007	1.593	1.51574	1.58745	1.5758	1.58691	1.51929
KMW0498	4-Oxodecanal	Aldehyde	C10H18O2	43160-78-7	fatty	0.012	1.84556	2.17029	2.05499	2.30468	2.31027	2.59158	2.21612	3.04979	2.55104	2.80706	2.75993	2.73993	2.40508	2.72984	2.61136	2.27064	2.78741	2.559	2.47958	2.69826	2.49187	2.43039	2.43132	2.45004	2.36712	2.72793	2.91647	2.86503	3.0266	2.92346	2.92412	3.31405	3.51354	3.73584	3.57621	3.63872
KMW0545	Dodecanal	Aldehyde	C12H24O	112-54-9	soapy, waxy, aldehydic, citrus, green, floral	10	0.0012013	0.00133104	0.00121856	0.00153543	0.0011758	0.00141662	0.00133162	0.00136188	0.00132499	0.00111601	0.00115293	0.00114424	0.00136692	0.00136802	0.00130787	0.00144975	0.00138004	0.00112588	0.00134782	0.00138075	0.0017743	0.00145322	0.00134852	0.00141247	0.00114905	0.00133239	0.0012671	0.00146769	0.0013556	0.00124678	0.00130573	0.00127704	0.00146811	0.00117535	0.00138758	0.00113116
KMW0568	2H-Pyran-2-one, tetrahydro-6-pentyl-	Ester	C10H18O2	705-86-2	creamy, coconut, fruity	0.066	0.368005	0.454383	0.391983	0.422161	0.380499	0.418978	0.42821	0.452728	0.421474	0.395256	0.41448	0.425879	0.369399	0.443566	0.376732	0.41222	0.417877	0.365432	0.459058	0.581491	0.784824	0.510856	0.516096	0.574574	0.506674	0.535592	0.528398	0.537925	0.554247	0.51817	0.460886	0.449815	0.52335	0.506145	0.44145	0.491849
KMW0561	2(3H)-Furanone, 5-hexyldihydro-	Ester	C10H18O2	706-14-9	fresh, oily, waxy, peach, coconut, buttery, sweet	0.0011	124.081	138.007	123.857	136.726	129.597	132.501	106.987	114.6	97.0582	108.123	103.089	109.194	163.302	172.476	174.644	198.961	163.184	177.808	185.185	206.642	269.622	193.166	190.959	207.89	229.426	247.32	234.787	256.652	250.942	238.348	238.291	241.906	238.615	246.236	237.261	236.329
KMW0560	Coumarin	Heterocyclic compound	C9H6O2	91-64-5	sweet, hay, tonka, new-mown hay	0.01	0.0425725	0.0445291	0.0413787	0.0443044	0.0449284	0.0438371	0.195981	0.311215	0.205859	0.452361	0.203679	0.324912	0.424923	0.448661	0.816292	0.817185	0.582396	0.592649	0.929995	1.22272	1.66832	1.09091	1.08395	0.993666	1.39159	1.4982	1.43959	1.56501	1.49758	1.42235	1.44341	1.41405	1.34095	1.42299	1.35374	1.38523
KMW0559	Bicyclo[7.2.0]undec-4-ene, 4,11,11-trimethyl-8-methylene-,[1R-(1R*,4Z,9S*)]-	Terpenoids	C15H24	118-65-0	woody, spicy	-	-	-	-	-	-	-	-	-	-	-	-	-	-	-	-	-	-	-	-	-	-	-	-	-	-	-	-	-	-	-	-	-	-	-	-	-
KMW0558	1,5-Dimethyl-1-vinyl-4-hexenyl butyrate	Ester	C14H24O2	78-36-4	bergamot, fruity, banana, berry	-	-	-	-	-	-	-	-	-	-	-	-	-	-	-	-	-	-	-	-	-	-	-	-	-	-	-	-	-	-	-	-	-	-	-	-	-
KMW0553	.gamma.-Elemene	Terpenoids	C15H24	29873-99-2	green, woody, oily	-	-	-	-	-	-	-	-	-	-	-	-	-	-	-	-	-	-	-	-	-	-	-	-	-	-	-	-	-	-	-	-	-	-	-	-	-
KMW0552	(-)-.beta.-Bourbonene	Terpenoids	C15H24	5208-59-3	herbal, woody, floral, balsamic	-	-	-	-	-	-	-	-	-	-	-	-	-	-	-	-	-	-	-	-	-	-	-	-	-	-	-	-	-	-	-	-	-	-	-	-	-
KMW0551	Tetradecane	Hydrocarbons	C14H30	629-59-4	mild, waxy	10	0.0105449	0.01241	0.010962	0.0120369	0.0121985	0.0120313	0.0113156	0.0107625	0.0101223	0.010871	0.0105897	0.0107787	0.0101165	0.0114143	0.0117814	0.0117843	0.0114407	0.0115717	0.0112267	0.0117327	0.0162477	0.0128776	0.0125283	0.01351	0.0127551	0.0133739	0.0130777	0.0141089	0.0139661	0.0128354	0.0121538	0.0116971	0.0127085	0.0128853	0.0121388	0.012858
KMW0550	(E)-β-damascone	Terpenoids	C13H20O	23726-91-2	fruity, floral, berry, plum, black currant, honey, rose, tobacco	2e-06	102145	103275	94219.5	102257	103007	100516	104314	107923	98377.8	101953	102099	106229	125634	131531	81324.1	141902	128218	135481	155221	121930	159895	164646	113063	169847	199546	207638	189404	212687	197945	200410	229449	220612	226061	226680	210523	215354
KMW0546	Acetic acid, decyl ester	Ester	C12H24O2	112-17-4	waxy, clean, fresh, laundered cloth, cloth, citrus, soapy	0.235	0.596086	0.70055	0.662832	0.71264	0.692013	0.702488	0.611739	0.696427	0.597079	0.615298	0.621008	0.636298	0.649386	0.660084	0.699582	0.735729	0.706324	0.63858	0.671802	0.743985	0.93793	0.729316	0.70384	0.749352	0.648238	0.713167	0.743218	0.729232	0.762814	0.678523	0.653621	0.698642	0.750582	0.739926	0.707173	0.709887
KMW0544	Methyleugenol	Phenol	C11H14O2	93-15-2	sweet, fresh, warm, spicy, clove, carnation, cinnamon	1.25	0.00293629	0.00433125	0.0041752	0.00392474	0.00400749	0.00324334	0.00443842	0.000352776	0.00254052	0.00375624	0.00197401	0.000328011	0.00379398	0.00269574	0.0033315	0.00370236	0.00254147	0.000330423	0.0032137	0.00190463	0.00505551	0.00210152	0.00401807	0.000397775	0.00176173	0.000387418	0.00324597	0.00255028	0.00188629	0.000389661	0.0032112	0.000364782	0.00370529	0.00304235	0.000388477	0.000375431
KMW0639	3-Buten-2-one, 4-(2,2,6-trimethyl-7-oxabicyclo[4.1.0]hept-1-yl)-	Terpenoids	C13H20O2	23267-57-4	fruity, sweet, berry, woody, violet, orris, powdery	0.1	1.76938	1.83772	1.6633	1.7975	1.82433	1.88216	1.72598	1.6649	1.66708	1.70394	1.70218	1.6877	1.70685	1.79258	1.6777	1.74287	1.79338	1.73504	1.84383	1.91072	2.87328	1.95079	2.10581	1.92418	1.37113	1.55642	1.40331	1.45678	1.43561	1.4932	1.63094	1.42471	1.70857	1.5091	1.48157	1.47241
KMW0541	2,4-Dithiapentane	Sulfur compounds	C3H8S2	1618-26-4	garlic, sulfury, green, spicy, mushroom	1.2e-05	417.578	412.496	367.737	357.105	349.403	369.895	416.233	469.593	424.916	446.633	403.809	352.479	334.209	350.084	247.493	293.023	291.99	303.443	333.615	259.301	375.442	348.418	307.391	352.824	295.888	324.34	310.844	324.462	348.882	294.233	696.241	663.459	490.467	608.848	640.687	760.918
KMW0540	Eugenol	Phenol	C10H12O2	97-53-0	floral, clove	0.0025	23.0326	26.4485	23.7577	26.7312	27.9108	27.1535	7.3644	7.94486	7.03641	7.38484	8.35022	7.50102	5.42326	11.8277	6.95388	7.1469	6.06346	5.76424	12.5934	13.1394	21.6455	13.5496	13.5486	13.9762	11.973	14.16	12.7084	13.3136	12.6859	13.5291	8.16269	8.06226	8.13667	8.68038	9.21729	8.07211
KMW0538	Isobornyl propionate	Ester	C13H22O2	2756-56-1	pungent, pine, camphor, woody, lavender	-	-	-	-	-	-	-	-	-	-	-	-	-	-	-	-	-	-	-	-	-	-	-	-	-	-	-	-	-	-	-	-	-	-	-	-	-
KMW0534	Butyl caprylate	Ester	C12H24O2	589-75-3	buttery, ether, herbal, dank	-	-	-	-	-	-	-	-	-	-	-	-	-	-	-	-	-	-	-	-	-	-	-	-	-	-	-	-	-	-	-	-	-	-	-	-	-
KMW0523	1-Undecanol	Alcohol	C11H24O	112-42-5	fresh, waxy, rose, soapy, clean, cloth, floral, citrus	0.05	0.383566	0.385946	0.386843	0.345907	0.378223	0.392818	0.49113	0.544887	0.467465	0.48108	0.494832	0.499386	0.706933	0.78978	0.697551	0.919035	0.724173	0.748792	0.833222	0.905073	1.31435	0.894332	0.820405	0.960734	1.03995	1.05847	0.99384	1.16043	1.05402	1.03354	0.964224	0.930514	0.959455	0.963203	0.894715	0.944388
KMW0519	Vanillin	Aldehyde	C8H8O3	121-33-5	sweet, vanilla, creamy, chocolate	0.053	0.800029	0.898399	0.820015	0.873863	0.898561	0.847551	0.725051	0.762994	0.770825	0.762051	0.709928	0.76935	0.713291	0.751264	0.787707	0.832176	0.782062	0.749904	0.91439	0.961416	1.37567	0.965762	0.909748	0.936889	0.902909	1.09125	0.921278	0.972735	0.997006	0.964329	1.11594	1.11873	1.15964	1.23936	1.18146	1.18901
KMW0509	Cyclohexene, 4-ethenyl-4-methyl-3-(1-methylethenyl)-1-(1-methylethyl)-, (3R-trans)-	Terpenoids	C15H24	20307-84-0	sweet, herbal, woody	-	-	-	-	-	-	-	-	-	-	-	-	-	-	-	-	-	-	-	-	-	-	-	-	-	-	-	-	-	-	-	-	-	-	-	-	-
KMW0501	Dihydrocarvyl acetate	Terpenoids	C12H20O2	20777-49-5	floral, rose, cumin, sweet, minty	-	-	-	-	-	-	-	-	-	-	-	-	-	-	-	-	-	-	-	-	-	-	-	-	-	-	-	-	-	-	-	-	-	-	-	-	-
KMW0577	2H-Pyran-2-one, 5,6-dihydro-6-pentyl-	Ketone	C10H16O2	54814-64-1	peach	1.1	0.0191935	0.021824	0.0198491	0.0240942	0.0208966	0.0229	0.0187851	0.0208883	0.0224324	0.02111	0.0187845	0.0236003	0.0273129	0.0267977	0.0287219	0.0343138	0.0294238	0.0273115	0.0288636	0.0318658	0.043524	0.0321318	0.0302959	0.0355651	0.0332779	0.0369587	0.0331523	0.0326844	0.0320327	0.0411345	0.034153	0.0330575	0.0334487	0.0354192	0.032626	0.0343479
KMW0578	Butanoic acid, 3-methyl-, 1-ethenyl-1,5-dimethyl-4-hexenyl ester	Ester	C15H26O2	1118-27-0	citrus, bergamot, lavender, peach, apricot, sage	-	-	-	-	-	-	-	-	-	-	-	-	-	-	-	-	-	-	-	-	-	-	-	-	-	-	-	-	-	-	-	-	-	-	-	-	-
KMW0585	Citronellyl isobutyrate	Ester	C14H26O2	97-89-2	sweet, fruity, floral, geranium, tropical	-	-	-	-	-	-	-	-	-	-	-	-	-	-	-	-	-	-	-	-	-	-	-	-	-	-	-	-	-	-	-	-	-	-	-	-	-
KMW0586	p-Coumaric acid, trans	Acid	C9H8O3	501-98-4	balsamic	-	-	-	-	-	-	-	-	-	-	-	-	-	-	-	-	-	-	-	-	-	-	-	-	-	-	-	-	-	-	-	-	-	-	-	-	-
KMW0637	2H-Pyran-2-one, 6-hexyltetrahydro-	Ester	C11H20O2	710-04-3	creamy, fatty, coconut, fruity, peach, waxy	19	0.000679824	0.000880998	0.000787328	0.000877518	0.000772376	0.000916829	0.000594383	0.000741333	0.000617164	0.000642431	0.000653103	0.00069965	0.000695469	0.000689251	0.00077799	0.000892296	0.000732579	0.000707562	0.000740003	0.000397268	0.00121002	0.000813094	0.000848548	0.00083317	0.000582034	0.000568847	0.000292875	0.000768261	0.000660857	0.000612253	0.00269519	0.00266239	0.00280388	0.0027011	0.0028286	0.0027968
KMW0636	1H-3a,7-Methanoazulen-5-ol, octahydro-3,8,8-trimethyl-6-methylene-	Terpenoids	C15H24O	28231-03-0	cedarwood, woody, sweet, soft	-	-	-	-	-	-	-	-	-	-	-	-	-	-	-	-	-	-	-	-	-	-	-	-	-	-	-	-	-	-	-	-	-	-	-	-	-
KMW0634	Benzene, 1,2,3-trimethoxy-5-(1-propenyl)-, (E)-	Ether	C12H16O3	5273-85-8	spicy, flowery	-	-	-	-	-	-	-	-	-	-	-	-	-	-	-	-	-	-	-	-	-	-	-	-	-	-	-	-	-	-	-	-	-	-	-	-	-
KMW0631	Guaiol	Terpenoids	C15H26O	489-86-1	woody, balsamic	-	-	-	-	-	-	-	-	-	-	-	-	-	-	-	-	-	-	-	-	-	-	-	-	-	-	-	-	-	-	-	-	-	-	-	-	-
KMW0629	1-Dodecanol	Alcohol	C12H26O	112-53-8	earthy, soapy, waxy, fatty, honey, coconut	1	0.0334512	0.0439589	0.0370531	0.0392189	0.0373469	0.0366302	0.0321656	0.0360573	0.0303447	0.0339646	0.0320874	0.0335468	0.051323	0.0529272	0.0565958	0.059955	0.050609	0.0556211	0.056802	0.0624727	0.0948161	0.058864	0.0605756	0.0615171	0.0682981	0.0729947	0.0695021	0.0753682	0.0696409	0.0690689	0.069687	0.0728854	0.0710397	0.0731162	0.0697174	0.0709969
KMW0627	Benzoic acid, 1-methylethyl ester	Ester	C10H12O2	939-48-0	sweet, fruity, floral, balsamic	-	-	-	-	-	-	-	-	-	-	-	-	-	-	-	-	-	-	-	-	-	-	-	-	-	-	-	-	-	-	-	-	-	-	-	-	-
KMW0625	Octanoic acid, hexyl ester	Ester	C14H28O2	1117-55-1	fruity, green, waxy, berry, apple, estery	0.07	4.36186	5.08142	4.68308	5.62322	5.2297	5.40819	4.3306	5.04213	4.17196	4.25978	4.4083	4.65178	4.37288	4.43321	4.99563	5.51951	4.67407	4.50244	4.03839	4.97582	6.14964	4.21182	4.52816	4.85467	2.17871	2.27454	2.16868	2.501	2.38449	2.19496	2.17371	2.12506	2.3633	2.32655	2.35825	2.28428
KMW0622	Cyclohexene, 3-(1,5-dimethyl-4-hexenyl)-6-methylene-, [S-(R*,S*)]-	Terpenoids	C15H24	20307-83-9	herbal, fruity, woody	-	-	-	-	-	-	-	-	-	-	-	-	-	-	-	-	-	-	-	-	-	-	-	-	-	-	-	-	-	-	-	-	-	-	-	-	-
KMW0619	Butanoic acid, 3,7-dimethyl-2,6-octadienyl ester, (E)-	Ester	C14H24O2	106-29-6	sweet, fruity, rose, waxy, raspberry, tropical	-	-	-	-	-	-	-	-	-	-	-	-	-	-	-	-	-	-	-	-	-	-	-	-	-	-	-	-	-	-	-	-	-	-	-	-	-
KMW0615	2(3H)-Furanone, 5-butyldihydro-4-methyl-, cis-	Ketone	C9H16O2	55013-32-6	sweet, spicy, coconut, vanilla	0.035	0.29317	0.369052	0.269511	0.211869	0.22224	0.285028	0.346206	0.255906	0.27579	0.252609	0.231079	0.264105	0.189507	0.291473	0.240204	0.272023	0.219189	0.23642	0.290176	0.504099	0.608039	0.315312	0.376103	0.374725	0.406731	0.380386	0.340397	0.416961	0.382633	0.409969	0.251887	0.31633	0.244496	0.319107	0.251771	0.26695
KMW0613	α-farnesene	Terpenoids	C15H24	502-61-4	citrus, herbal, lavender, bergamot, myrrh, neroli, green	0.087	0.118461	0.117528	0.117273	0.150473	0.146968	0.137092	0.172735	0.198508	0.173136	0.165333	0.169563	0.173239	0.275409	0.270098	0.299539	0.320442	0.282617	0.283343	0.367634	0.420511	0.568949	0.393212	0.398205	0.427897	0.932508	0.954202	0.896043	1.01378	0.949812	0.928688	1.14921	1.10276	1.07919	1.12416	1.06735	1.10426
KMW0612	1,3-Benzodioxole, 4-methoxy-6-(2-propenyl)-	Ether	C11H12O3	607-91-0	spicy, warm, balsamic, woody	0.088	0.0512204	0.0634837	0.0507481	0.0548927	0.0512416	0.0637612	0.0515159	0.0571455	0.0520406	0.0526752	0.0542198	0.0548242	0.0436894	0.0519309	0.0421389	0.051082	0.0537642	0.0444244	0.0629835	0.060203	0.0850234	0.0694565	0.0561291	0.0703005	0.0483234	0.0491765	0.0480297	0.0556729	0.0470002	0.0490827	0.0384417	0.0393321	0.04026	0.0393093	0.0408886	0.0396046
KMW0609	Citronellyl butyrate	Ester	C14H26O2	141-16-2	sweet, fruity, floral, tropical, green, geranium, waxy	-	-	-	-	-	-	-	-	-	-	-	-	-	-	-	-	-	-	-	-	-	-	-	-	-	-	-	-	-	-	-	-	-	-	-	-	-
KMW0605	Pentanoic acid, 1-ethenyl-1,5-dimethyl-4-hexenyl ester	Ester	C15H26O2	10471-96-2	fruity, lavender, apricot, citrus	-	-	-	-	-	-	-	-	-	-	-	-	-	-	-	-	-	-	-	-	-	-	-	-	-	-	-	-	-	-	-	-	-	-	-	-	-
KMW0602	Pentadecane	Hydrocarbons	C15H32	629-62-9	waxy	13000	1.48643e-06	1.9437e-06	1.85199e-06	1.99419e-06	1.91659e-06	2.33652e-06	2.35293e-06	2.64608e-06	2.2984e-06	2.18253e-06	2.40178e-06	2.55072e-06	2.54634e-06	2.57611e-06	2.48387e-06	2.38281e-06	2.66569e-06	2.30143e-06	3.20171e-06	3.87305e-06	3.95361e-06	3.05857e-06	3.48301e-06	3.45276e-06	4.81811e-06	5.20291e-06	5.19114e-06	5.43472e-06	5.22085e-06	4.97212e-06	5.81362e-06	5.79533e-06	6.43705e-06	6.13173e-06	6.17967e-06	6.48478e-06
KMW0599	Dodecanoic acid, methyl ester	Ester	C13H26O2	111-82-0	waxy, soapy, creamy, coconut, mushroom	0.0035	0.244299	0.274269	0.188729	0.290568	0.173935	0.312288	0.284548	0.438713	0.397592	0.386835	0.409218	0.403827	0.696795	0.811929	0.773753	0.77997	0.602399	0.738618	1.05777	1.24368	1.4276	1.06039	1.09905	1.11775	2.23514	2.51799	2.48031	2.58035	2.57474	2.47277	2.86367	2.74279	3.03971	2.82059	2.7261	2.77646
KMW0598	Tridecanal	Aldehyde	C13H26O	10486-19-8	fresh, clean, aldehydic, soapy, citrus, petal, waxy, grapefruit, peel	0.07	1.07478	1.14858	1.05052	1.20676	1.17328	1.21787	1.01989	1.12527	1.00018	1.03445	1.03473	1.06079	1.43434	1.3171	1.52796	1.46108	1.48513	1.5579	1.4418	1.6788	2.7161	1.52848	1.55797	1.57643	1.3311	1.50395	1.38852	1.48692	1.42634	1.45471	1.29164	1.28928	1.34888	1.34523	1.30603	1.26895
KMW0589	Humulene	Terpenoids	C15H24	6753-98-6	woody	0.16	0.573703	0.630342	0.562127	0.618548	0.633569	0.612456	0.774653	0.802776	0.722972	0.761294	0.735606	0.782804	0.971818	1.01071	1.03543	1.14318	1.00203	1.01647	1.42907	1.60545	2.20249	1.51719	1.55236	1.60562	2.7067	2.82619	2.57485	3.00632	2.6997	2.71553	2.86544	2.75093	2.8355	2.82559	2.60362	2.69168
GMW0258	Hexanoic acid, 2-propenyl ester	Ester	C9H16O2	123-68-2	sweet, fruity, pineapple, tropical, ethereal, rummy, arrack, fatty, cognac	0.5	0.0789597	0.0738729	0.0588247	0.06486	0.0976629	0.0537182	0.0654526	0.056028	0.0636028	0.0704842	0.0587577	0.064283	0.0472698	0.0460623	0.0588786	0.0352722	0.0234488	0.0417082	0.0685035	0.100481	0.0776106	0.0767495	0.0401305	0.0401054	0.0608767	0.0486205	0.0491336	0.0553234	0.0506316	0.0594418	0.0700659	0.0511604	0.0394388	0.0687971	0.0519309	0.0534311
NMW0103	Caprolactam	Amine	C6H11NO	105-60-2	amine, spicy	59.7	0.00717132	0.00818487	0.0079901	0.00932616	0.00912666	0.00915367	0.00736741	0.00860326	0.00726593	0.00806603	0.00764939	0.00889438	0.00696644	0.00673017	0.0069298	0.00841808	0.00724881	0.00686524	0.00712469	0.0062284	0.00980325	0.00727112	0.00756409	0.00801392	0.00586639	0.00719197	0.00737002	0.00780202	0.00778339	0.00732948	0.00783117	0.00737486	0.00780176	0.00883264	0.00781576	0.00708179
D246	Propanoic acid, 2-methyl-, 3,7-dimethyl-2,6-octadienyl ester, (Z)-	Ester	C14H24O2	2345-24-6	sweet, fresh, fruity, raspberry, strawberry, green	-	-	-	-	-	-	-	-	-	-	-	-	-	-	-	-	-	-	-	-	-	-	-	-	-	-	-	-	-	-	-	-	-	-	-	-	-
D271	Propanoic acid, hexyl ester	Ester	C9H18O2	2445-76-3	pear, green, fruity, musty, rotten	0.008	3.19939	3.49719	2.56383	2.45033	2.88135	2.48428	2.67227	2.52773	2.66743	2.53696	2.38833	2.86564	2.96222	2.65107	2.74595	2.65324	2.68699	2.68863	2.95029	2.35774	3.3058	3.12325	2.30156	2.26879	1.66879	2.07856	1.62504	1.79397	1.39683	2.0179	1.89134	1.67649	1.31973	1.46165	2.00656	1.93063
D27	Benzene, (2-isothiocyanatoethyl)-	Ester	C9H9NS	2257-09-2	green, horseradish, gooseberry, watercress	0.006	2.59784	2.79429	2.5164	2.89835	2.96161	2.79639	2.91611	3.05902	2.47101	2.78547	2.49376	2.8925	2.65999	2.57548	2.7095	2.83359	2.72462	2.74112	2.98948	3.38557	4.48113	2.99399	3.02481	3.05239	3.95864	3.53373	3.67024	3.63275	3.34612	3.62564	7.85799	7.83875	7.9755	7.67187	7.72474	7.77542
D268	Tetrasulfide, di-2-propenyl	Sulfur compounds	C6H10S4	2444-49-7	strong garlic, onion	-	-	-	-	-	-	-	-	-	-	-	-	-	-	-	-	-	-	-	-	-	-	-	-	-	-	-	-	-	-	-	-	-	-	-	-	-
D265	Dodecanenitrile	Nitrogen compounds	C12H23N	2437-25-4	citrus, orange, peel, metallic, spicy	9e-05	310.898	359.337	311.11	330.583	378.252	337.873	243.42	292.805	269.474	284.506	273.571	271.077	333.665	348.363	363.205	359.619	358.611	338.662	411.04	444.29	647.26	460.214	427.313	451.95	393.256	435.566	422.638	447.893	413.37	425.888	412.18	424.25	433.193	431.45	457.203	446.215
D255	Quinoxaline, 2,3-dimethyl-	Heterocyclic compound	C10H10N2	2379-55-7	fatty, earthy	-	-	-	-	-	-	-	-	-	-	-	-	-	-	-	-	-	-	-	-	-	-	-	-	-	-	-	-	-	-	-	-	-	-	-	-	-
D254	2H-2,4a-Methanonaphthalen-8(5H)-one, 1,3,4,6,7,8a-hexahydro-1,1,5,5-tetramethyl-	Terpenoids	C15H24O	23787-90-8	dry, woody, patchouli, cedary, earthy, tobacco, incense	-	-	-	-	-	-	-	-	-	-	-	-	-	-	-	-	-	-	-	-	-	-	-	-	-	-	-	-	-	-	-	-	-	-	-	-	-
D251	Hibaene	Terpenoids	C20H32	2359-73-1	-	-	-	-	-	-	-	-	-	-	-	-	-	-	-	-	-	-	-	-	-	-	-	-	-	-	-	-	-	-	-	-	-	-	-	-	-	-
D25	Propanoic acid, 2-methyl-, 3-methylbutyl ester	Ester	C9H18O2	2050-01-3	fruity, ethereal, tropical, green, grape, cherry, unripe banana, apple, cocoa	0.087	0.0517513	0.0605873	0.0538316	0.0487493	0.0488529	0.0476042	0.0205574	0.0258182	0.0239088	0.021645	0.0213226	0.0275586	0.0496159	0.0473787	0.0468313	0.0504671	0.0480353	0.0527359	0.0252484	0.0248332	0.0281218	0.0321203	0.0227692	0.0239332	0.0212996	0.020489	0.0255398	0.0226372	0.0199923	0.0206906	0.0217326	0.0161767	0.021734	0.0287757	0.0184951	0.0224798
D249	Ethanol, 2-phenoxy-, propanoate	Ester	C11H14O3	23495-12-7	resinous, fruity, myrrh, opoponax, lavender, hay	-	-	-	-	-	-	-	-	-	-	-	-	-	-	-	-	-	-	-	-	-	-	-	-	-	-	-	-	-	-	-	-	-	-	-	-	-
D243	(5a.alpha.,9a.beta.,9b.beta.)-5,5a,6,7,8,9,9a,9b-octahydro-6,6,9a-trimethylnaphtho[1,2-c]furan-1-(3H)-one (drimenin)	Heterocyclic compound	C15H22O2	2326-89-8	-	-	-	-	-	-	-	-	-	-	-	-	-	-	-	-	-	-	-	-	-	-	-	-	-	-	-	-	-	-	-	-	-	-	-	-	-	-
D19	2-Naphthyl methyl ketone	Ketone	C12H10O	93-08-3	sweet, neroli, orange, blossom, neroli, powdery	-	-	-	-	-	-	-	-	-	-	-	-	-	-	-	-	-	-	-	-	-	-	-	-	-	-	-	-	-	-	-	-	-	-	-	-	-
D241	3-Cyclohexene-1-methanol, .alpha.,4-dimethyl-.alpha.-(4-methyl-3-pentenyl)-, [R-(R*,R*)]-	Terpenoids	C15H26O	23178-88-3	-	-	-	-	-	-	-	-	-	-	-	-	-	-	-	-	-	-	-	-	-	-	-	-	-	-	-	-	-	-	-	-	-	-	-	-	-	-
D24	Benzenesulfonamide	Amine	C6H7NO2S	98-10-2	sweet, fruity, caramel, maple, fenugreek, brown, sugar, nutty, chicory, praline, butterscotch	-	-	-	-	-	-	-	-	-	-	-	-	-	-	-	-	-	-	-	-	-	-	-	-	-	-	-	-	-	-	-	-	-	-	-	-	-
D227	Phenol, (1,1-dimethylethyl)-4-methoxy- (CAS)	Phenol	C11H16O2	25013-16-5	mild, rubbery	-	-	-	-	-	-	-	-	-	-	-	-	-	-	-	-	-	-	-	-	-	-	-	-	-	-	-	-	-	-	-	-	-	-	-	-	-
D226	2-Dodecanone	Ketone	C12H24O	6175-49-1	fruity, citrus, floral, orange	0.042	42.7164	44.3909	41.0508	45.5342	45.7058	43.7371	39.7682	41.3291	36.8555	39.137	36.7024	40.253	36.5219	38.7664	39.6049	44.1331	38.6413	40.7027	43.1637	47.5415	63.6811	46.3348	45.4168	48.8746	42.3871	45.2253	42.7423	47.3224	44.4335	43.9728	39.8324	39.1418	39.7455	40.6178	37.3208	38.9564
D216	α-irone	Terpenoids	C14H22O	79-69-6	orris, floral, berry, violet, woody, powdery	0.002	12.5647	13.9428	12.2005	14.3355	13.7277	13.7108	28.3453	29.6539	26.0631	27.2926	26.9051	28.912	52.1116	53.6108	56.1176	61.9688	53.7594	56.0712	80.7677	91.6973	124.266	86.9362	86.5836	92.086	191.874	203.622	190.767	210.371	199.498	200.108	206.753	201.447	208.945	204.463	195.92	198.142
D215	Daucol	Terpenoids	C15H26O2	887-08-1	-	-	-	-	-	-	-	-	-	-	-	-	-	-	-	-	-	-	-	-	-	-	-	-	-	-	-	-	-	-	-	-	-	-	-	-	-	-
D211	Piperazine	Heterocyclic compound	C4H10N2	110-85-0	ammoniacal	1720	1.18665e-05	1.54814e-05	1.34817e-05	1.71518e-05	7.22742e-06	1.74923e-05	1.38207e-05	1.97001e-05	1.58481e-05	1.75416e-05	1.40186e-05	1.49255e-05	1.50344e-05	1.67338e-05	1.67263e-05	1.77629e-05	1.61567e-05	1.97322e-05	2.07553e-05	2.17724e-05	1.61754e-05	2.36142e-05	6.74552e-06	1.83144e-05	1.74493e-05	1.77922e-05	1.74344e-05	1.75088e-05	1.68686e-05	2.08491e-05	2.2294e-05	2.71104e-05	2.62933e-05	2.79862e-05	3.21637e-05	3.08131e-05
D21	Oxirane, phenyl-	Heterocyclic compound	C8H8O	96-09-3	-	0.3	0.0443253	0.051306	0.0457263	0.0476168	0.0441964	0.0455207	0.0489473	0.0519402	0.0378856	0.044955	0.0451722	0.0393097	0.0372932	0.038746	0.0408932	0.0366971	0.0378698	0.0382406	0.0416253	0.0429489	0.0414243	0.0506049	0.0393769	0.0447773	0.0394272	0.0398422	0.0425674	0.044106	0.0443223	0.0405871	0.0367284	0.0408214	0.0397764	0.0475755	0.0386733	0.0363435
D202	3-Hexen-1-ol, propanoate, (Z)-	Ester	C9H16O2	33467-74-2	green, fresh, fruity, apple, pear, vegetable, melon, banana, peach	-	-	-	-	-	-	-	-	-	-	-	-	-	-	-	-	-	-	-	-	-	-	-	-	-	-	-	-	-	-	-	-	-	-	-	-	-
D197	3-Oxatricyclo[4.1.1.0(2,4)]octane, 2,7,7-trimethyl-	Terpenoids	C10H16O	1686-14-2	green	-	-	-	-	-	-	-	-	-	-	-	-	-	-	-	-	-	-	-	-	-	-	-	-	-	-	-	-	-	-	-	-	-	-	-	-	-
D274	2H-1-Benzopyran-2-one, 3-methyl-	Ketone	C10H8O2	2445-82-1	-	-	-	-	-	-	-	-	-	-	-	-	-	-	-	-	-	-	-	-	-	-	-	-	-	-	-	-	-	-	-	-	-	-	-	-	-	-
D275	Benzenemethanamine, N,N,.alpha.-trimethyl-	Amine	C10H15N	2449-49-2	-	-	-	-	-	-	-	-	-	-	-	-	-	-	-	-	-	-	-	-	-	-	-	-	-	-	-	-	-	-	-	-	-	-	-	-	-	-
D276	Bicyclo[3.1.0]hex-3-en-2-one, 4-methyl-1-(1-methylethyl)-	Terpenoids	C10H14O	24545-81-1	minty, pungent	0.75	0.0191224	0.019877	0.0226932	0.0176155	0.0252972	0.0207592	0.0248859	0.0216064	0.0247789	0.0257979	0.024827	0.0205059	0.0182775	0.0204332	0.0185273	0.0202572	0.018226	0.0176706	0.0238219	0.0225148	0.0311032	0.0240756	0.0244678	0.0206464	0.0111946	0.0144512	0.0140793	0.0151737	0.0158795	0.0157599	0.0164564	0.0180964	0.01025	0.0145593	0.0151144	0.0135005
D281	Avocadynofuran	Heterocyclic compound	C17H26O	24708-33-6	-	-	-	-	-	-	-	-	-	-	-	-	-	-	-	-	-	-	-	-	-	-	-	-	-	-	-	-	-	-	-	-	-	-	-	-	-	-
D330	Phenol, 2-(phenylmethyl)-	Phenol	C13H12O	28994-41-4	-	-	-	-	-	-	-	-	-	-	-	-	-	-	-	-	-	-	-	-	-	-	-	-	-	-	-	-	-	-	-	-	-	-	-	-	-	-
D328	(5R,10R)-10-Methyl-6-methylene-2-(propan-2-ylidene)spiro[4.5]dec-7-ene	Terpenoids	C15H22	28908-27-2	-	-	-	-	-	-	-	-	-	-	-	-	-	-	-	-	-	-	-	-	-	-	-	-	-	-	-	-	-	-	-	-	-	-	-	-	-	-
D325	(3R,3aR,7S,8aS)-3,6,8,8-Tetramethyl-4,7,8,8a-tetrahydro-1H-3a,7-methanoazulen-2(3H)-one	Terpenoids	C15H22O	288249-25-2	-	-	-	-	-	-	-	-	-	-	-	-	-	-	-	-	-	-	-	-	-	-	-	-	-	-	-	-	-	-	-	-	-	-	-	-	-	-
D322	(3S,3aR,6R,8aS)-3,7,7-Trimethyl-8-methylenehexahydro-1H-3a,6-methanoazulen-2(3H)-one	Terpenoids	C15H22O	28624-27-3	-	-	-	-	-	-	-	-	-	-	-	-	-	-	-	-	-	-	-	-	-	-	-	-	-	-	-	-	-	-	-	-	-	-	-	-	-	-
D320	(3E,7E)-1,5,5,8-Tetramethylcycloundeca-3,7-dienol	Terpenoids	C15H26O	28446-26-6	-	-	-	-	-	-	-	-	-	-	-	-	-	-	-	-	-	-	-	-	-	-	-	-	-	-	-	-	-	-	-	-	-	-	-	-	-	-
D319	.beta.-Acorenol	Terpenoids	C15H26O	28400-11-5	-	-	-	-	-	-	-	-	-	-	-	-	-	-	-	-	-	-	-	-	-	-	-	-	-	-	-	-	-	-	-	-	-	-	-	-	-	-
D318	.beta.-Oplopenone	Terpenoids	C15H24O	28305-60-4	-	-	-	-	-	-	-	-	-	-	-	-	-	-	-	-	-	-	-	-	-	-	-	-	-	-	-	-	-	-	-	-	-	-	-	-	-	-
D317	2-Buten-1-ol, 2-ethyl-4-(2,2,3-trimethyl-3-cyclopenten-1-yl)-	Alcohol	C14H24O	28219-61-6	woody, sandalwood, greasy, oily, waxy	-	-	-	-	-	-	-	-	-	-	-	-	-	-	-	-	-	-	-	-	-	-	-	-	-	-	-	-	-	-	-	-	-	-	-	-	-
D316	Adamantane	Hydrocarbons	C10H16	281-23-2	-	2100	1.11e-05	1.10546e-05	9.35425e-06	1.08435e-05	1.09925e-05	1.03485e-05	9.77451e-06	1.07808e-05	9.66052e-06	8.8169e-06	9.15074e-06	8.95071e-06	5.42535e-06	6.27477e-06	7.33938e-06	7.53489e-06	6.70503e-06	6.9019e-06	6.47122e-06	4.91645e-06	6.2956e-06	5.50607e-06	7.2623e-06	5.53295e-06	4.89778e-06	5.32774e-06	3.31257e-06	3.47481e-06	4.49683e-06	3.72655e-06	4.47876e-06	3.95e-06	5.00663e-06	3.89617e-06	2.83258e-06	5.26475e-06
D311	3-p-Menthen-7-al	Aldehyde	C10H16O	27841-22-1	-	-	-	-	-	-	-	-	-	-	-	-	-	-	-	-	-	-	-	-	-	-	-	-	-	-	-	-	-	-	-	-	-	-	-	-	-	-
D303	2H-Pyran-2-one, tetrahydro-6-nonyl-	Ketone	C14H26O2	2721-22-4	waxy, creamy, buttery, oily, fatty, cheese, milky, dairy	9.8	0.00203862	0.00187094	0.00203227	0.00166694	0.00116588	0.00180942	0.00188691	0.00216154	0.0016637	0.0020875	0.00182534	0.00165879	0.0021736	0.00177208	0.00233091	0.0014678	0.00258101	0.00224909	0.00196936	0.00143664	0.00163875	0.0024362	0.00209041	0.00183915	0.0033002	0.00152747	0.00192552	0.00307818	0.00205542	0.00154777	0.00263309	0.00287647	0.00240752	0.0024769	0.00349931	0.00334135
D301	Benzeneacetaldehyde, .alpha.-(2-methylpropylidene)-	Aldehyde	C12H14O	26643-91-4	sweet, cocoa, nutty, rose, powdery	-	-	-	-	-	-	-	-	-	-	-	-	-	-	-	-	-	-	-	-	-	-	-	-	-	-	-	-	-	-	-	-	-	-	-	-	-
D30	1-Octen-3-yl-acetate	Ester	C10H18O2	2442-10-6	fresh, green, herbal, lavender, fruity, oily	0.09	0.360311	0.319479	0.291025	0.341797	0.325117	0.326854	0.265809	0.283218	0.256005	0.267105	0.264752	0.246998	0.176121	0.196042	0.172536	0.200721	0.202777	0.208291	0.170113	0.166426	0.163881	0.15948	0.16282	0.161314	0.0659591	0.0945343	0.0745488	0.0938667	0.0994801	0.0856001	0.0959834	0.102066	0.110236	0.102288	0.116499	0.111407
D295	Benzene, 1-methoxy-4-(1-propenyl)-, (Z)-	Ether	C10H12O	25679-28-1	anisic	-	-	-	-	-	-	-	-	-	-	-	-	-	-	-	-	-	-	-	-	-	-	-	-	-	-	-	-	-	-	-	-	-	-	-	-	-
D294	2-Cyclopenten-1-one, 2-pentyl-	Ketone	C10H16O	25564-22-1	woody, isojasmone, jasmin, tuberose	-	-	-	-	-	-	-	-	-	-	-	-	-	-	-	-	-	-	-	-	-	-	-	-	-	-	-	-	-	-	-	-	-	-	-	-	-
D292	Bicyclo[2.2.1]heptane, 2-methyl-3-methylene-2-(4-methyl-3-pentenyl)-, (1S-endo)-	Terpenoids	C15H24	25532-78-9	-	-	-	-	-	-	-	-	-	-	-	-	-	-	-	-	-	-	-	-	-	-	-	-	-	-	-	-	-	-	-	-	-	-	-	-	-	-
D286	Bicyclo[3.1.1]heptan-2-one, 6,6-dimethyl-	Ketone	C9H14O	24903-95-5	-	-	-	-	-	-	-	-	-	-	-	-	-	-	-	-	-	-	-	-	-	-	-	-	-	-	-	-	-	-	-	-	-	-	-	-	-	-
D282	Citronellyl tiglate	Terpenoids	C15H26O2	24717-85-9	rose, fruity, floral, geranium, leafy, tea	-	-	-	-	-	-	-	-	-	-	-	-	-	-	-	-	-	-	-	-	-	-	-	-	-	-	-	-	-	-	-	-	-	-	-	-	-
D191	2-Hexanoylfuran	Heterocyclic compound	C10H14O2	14360-50-0	sweet, fruity, ketonic, green, apricot, peach	-	-	-	-	-	-	-	-	-	-	-	-	-	-	-	-	-	-	-	-	-	-	-	-	-	-	-	-	-	-	-	-	-	-	-	-	-
D337	2H-2a,7-Methanoazuleno[5,6-b]oxirene, octahydro-3,6,6,7a-tetramethyl-	Terpenoids	C15H24O	29597-36-2	-	-	-	-	-	-	-	-	-	-	-	-	-	-	-	-	-	-	-	-	-	-	-	-	-	-	-	-	-	-	-	-	-	-	-	-	-	-
D102	1-Pentanone, 1-phenyl-	Ketone	C11H14O	1009-14-9	balsamic, valerian	-	-	-	-	-	-	-	-	-	-	-	-	-	-	-	-	-	-	-	-	-	-	-	-	-	-	-	-	-	-	-	-	-	-	-	-	-
D131	3-Pentyn-1-ol	Alcohol	C5H8O	10229-10-4	-	-	-	-	-	-	-	-	-	-	-	-	-	-	-	-	-	-	-	-	-	-	-	-	-	-	-	-	-	-	-	-	-	-	-	-	-	-
D126	Benzeneacetic acid, phenylmethyl ester	Ester	C15H14O2	102-16-9	sweet, floral, jasmin, cocoa	-	-	-	-	-	-	-	-	-	-	-	-	-	-	-	-	-	-	-	-	-	-	-	-	-	-	-	-	-	-	-	-	-	-	-	-	-
D125	Benzeneacetic acid, 2-methylpropyl ester	Ester	C12H16O2	102-13-6	sweet, floral, honey, chocolate, amber	-	-	-	-	-	-	-	-	-	-	-	-	-	-	-	-	-	-	-	-	-	-	-	-	-	-	-	-	-	-	-	-	-	-	-	-	-
D123	2-Propanone, 1,3-diphenyl-	Ketone	C15H14O	102-04-5	bitter, almond, benzaldehyde, plastic, seedy	-	-	-	-	-	-	-	-	-	-	-	-	-	-	-	-	-	-	-	-	-	-	-	-	-	-	-	-	-	-	-	-	-	-	-	-	-
D120	Octanal, 2-(phenylmethylene)-	Acid	C15H20O	101-86-0	fresh, floral, green, jasmin, herbal, waxy	-	-	-	-	-	-	-	-	-	-	-	-	-	-	-	-	-	-	-	-	-	-	-	-	-	-	-	-	-	-	-	-	-	-	-	-	-
D118	Diphenyl ether	Ether	C12H10O	101-84-8	green, phenol, floral, rose, geranium, cortex, metallic, medicinal	0.015	0.692236	0.539272	0.684366	0.574613	0.729202	0.531781	0.68804	0.56546	0.492417	0.508549	0.523262	0.516595	0.450603	0.484772	0.481866	0.482049	0.45619	0.437938	0.518634	0.546172	0.830195	0.589201	0.825302	0.7627	0.514371	0.669624	0.497456	0.609191	0.610058	0.682738	0.532663	0.628524	0.687787	0.675359	0.519363	0.54814
D110	Bicyclo[3.1.1]heptan-3-one, 2-hydroxy-2,6,6-trimethyl-	Ketone	C10H16O2	10136-65-9	-	-	-	-	-	-	-	-	-	-	-	-	-	-	-	-	-	-	-	-	-	-	-	-	-	-	-	-	-	-	-	-	-	-	-	-	-	-
D106	Ethanone, 1,1'-(1,4-phenylene)bis-	Ketone	C10H10O2	1009-61-6	-	-	-	-	-	-	-	-	-	-	-	-	-	-	-	-	-	-	-	-	-	-	-	-	-	-	-	-	-	-	-	-	-	-	-	-	-	-
D1026	1,7-Dioxacycloheptadecan-8-one	Ketone	C15H28O3	3391-83-1	-	0.019	1.34488	1.43082	1.44977	1.51912	1.50804	1.66529	1.28364	1.34358	1.25231	1.32648	1.35541	1.27429	1.40791	1.312	1.53117	1.39073	1.58916	1.38667	1.46503	1.39759	2.14618	1.48846	1.59779	1.70789	1.73711	1.33384	1.39734	1.84012	1.72912	1.51684	1.91557	1.77529	1.91817	1.78199	2.04646	1.9435
CY_234	1,2-Benzenedicarboxylic acid	Acid	C8H6O4	88-99-3	-	54	0.00129286	0.00152399	0.00144222	0.00178593	0.00162292	0.00172963	0.00130033	0.00159613	0.00124378	0.00131676	0.00129991	0.00141603	0.00130881	0.00134429	0.00159046	0.00178548	0.00135709	0.00137358	0.00124598	0.00158433	0.00193094	0.00126989	0.00144711	0.00159142	0.000636489	0.000632191	0.000638958	0.000762634	0.000710056	0.000638434	0.000604156	0.000591825	0.000644843	0.000628975	0.000626246	0.000665516
D187	Resorcinol	Phenol	C6H6O2	108-46-3	nutty, creamy, phenol, hawthorn, musty	6	0.0032365	0.00371204	0.00328986	0.0036899	0.00310621	0.00318755	0.00279633	0.00344363	0.00250848	0.00322254	0.0030884	0.00299354	0.00340244	0.00367987	0.00327989	0.00379167	0.00300182	0.00326917	0.00305029	0.00332666	0.00410043	0.00339383	0.00289574	0.00326377	0.00234663	0.00241699	0.00248177	0.00241573	0.00246022	0.00285548	0.00217901	0.00242075	0.00245001	0.00260529	0.00253577	0.00285464
CY_230	2(3H)-Furanone, dihydro-3-hydroxy-4,4-dimethyl-, (.+/-.)-	Heterocyclic compound	C6H10O3	79-50-5	-	0.4	0.0852802	0.0801158	0.0808251	0.0826407	0.0892366	0.0796797	0.0738648	0.0852377	0.0812963	0.0814094	0.0736965	0.0611266	0.0735584	0.0608087	0.0602364	0.0581257	0.0656759	0.0616592	0.049726	0.0496611	0.0572002	0.0829717	0.0570686	0.0458674	0.0605575	0.0448078	0.0732084	0.0422809	0.039969	0.0544324	0.0522245	0.0424028	0.039372	0.0548834	0.0376589	0.0441731
CY_111	Indene	Aromatics	C9H8	95-13-6	-	0.013	0.327375	0.385641	0.374089	0.345302	0.4274	0.310914	0.23756	0.311922	0.310426	0.345132	0.280085	0.311374	0.444357	0.442709	0.466182	0.45879	0.575987	0.446449	0.277949	0.259856	0.357701	0.305136	0.353486	0.354342	0.212626	0.436588	0.407328	0.253104	0.300838	0.347985	0.297381	0.308791	0.280915	0.247205	0.258651	0.356232
CY_064	1H-Naphtho[2,1-b]pyran, 4a,5,6,6a,7,8,9,10,10a,10b-decahydro-3,4a,7,7,10a-pentamethyl-, [4aR-(4a.alpha.,6a.beta.,10a.alpha.,10b.beta.)]-	Heterocyclic compound	C18H30O	5153-92-4	-	0.00074	33.5431	37.6035	34.9879	40.5694	37.9392	37.4247	33.4913	40.5945	31.7625	34.2047	34.8601	35.5448	28.2334	29.5368	36.6404	40.3342	29.0518	30.1602	39.3752	44.7622	66.8697	45.3605	42.5358	53.7655	44.057	42.0669	40.1249	48.5063	44.8776	42.5609	36.9181	34.6529	35.4553	33.8203	34.7338	34.1961
CY_023	Dibenzofuran	Heterocyclic compound	C12H8O	132-64-9	-	0.12	0.0565605	0.0598204	0.0600945	0.066218	0.0657597	0.0686128	0.0665783	0.0694656	0.0596121	0.0611092	0.0612773	0.0662249	0.0758865	0.077406	0.0848423	0.0853669	0.0825975	0.0722012	0.0850254	0.117434	0.142606	0.101607	0.106184	0.100219	0.161703	0.170273	0.162086	0.183993	0.169617	0.170723	0.190192	0.19433	0.199426	0.202809	0.196912	0.193449
BPMW018	Flavanone	Ketone	C15H12O2	487-26-3	-	-	-	-	-	-	-	-	-	-	-	-	-	-	-	-	-	-	-	-	-	-	-	-	-	-	-	-	-	-	-	-	-	-	-	-	-	-
BPMW017	1H-Indole-3-acetic acid, ethyl ester	Heterocyclic compound	C12H13NO2	778-82-5	-	-	-	-	-	-	-	-	-	-	-	-	-	-	-	-	-	-	-	-	-	-	-	-	-	-	-	-	-	-	-	-	-	-	-	-	-	-
BPMW012	2(3H)-Benzoxazolone	Ester	C7H5NO2	59-49-4	-	-	-	-	-	-	-	-	-	-	-	-	-	-	-	-	-	-	-	-	-	-	-	-	-	-	-	-	-	-	-	-	-	-	-	-	-	-
BPMW009	3-Pyridinecarboxamide, N-methyl-	Heterocyclic compound	C7H8N2O	114-33-0	-	-	-	-	-	-	-	-	-	-	-	-	-	-	-	-	-	-	-	-	-	-	-	-	-	-	-	-	-	-	-	-	-	-	-	-	-	-
D1352	Benzoic acid, 3-methoxy-	Acid	C8H8O3	586-38-9	-	5	0.010994	0.0253597	0.0225107	0.024738	0.0245741	0.0159911	0.017362	0.019676	0.0161528	0.0183825	0.0162633	0.0189466	0.0307896	0.0231461	0.0232454	0.0252722	0.0228804	0.0239374	0.0305242	0.0339369	0.0437961	0.0316111	0.0314308	0.033374	0.0464298	0.0464861	0.0430075	0.0491287	0.0453365	0.0461468	0.0525318	0.0500578	0.0516746	0.0512138	0.046316	0.0477413
D138	Triacetin	Ester	C9H14O6	102-76-1	mild, clean, tropical, fruity	-	-	-	-	-	-	-	-	-	-	-	-	-	-	-	-	-	-	-	-	-	-	-	-	-	-	-	-	-	-	-	-	-	-	-	-	-
D1404	1-Octyne	Hydrocarbons	C8H14	629-05-0	-	609	1.9128e-05	1.99718e-05	1.91271e-05	1.86423e-05	1.83706e-05	1.9188e-05	1.27008e-05	1.37262e-05	1.28728e-05	1.28575e-05	1.20146e-05	1.17675e-05	2.00634e-05	1.9209e-05	1.87703e-05	2.03756e-05	2.13326e-05	2.11078e-05	1.50788e-05	1.70854e-05	1.89813e-05	1.89493e-05	2.00704e-05	1.96754e-05	1.72926e-05	1.72026e-05	1.88363e-05	1.79416e-05	1.59702e-05	1.97894e-05	1.82327e-05	1.67892e-05	1.73294e-05	1.90734e-05	2.19778e-05	1.88371e-05
D180	Citronellyl anthranilate	Ester	C17H25NO2	68555-57-7	sweet, rose, fruity, neroli, petitgrain	-	-	-	-	-	-	-	-	-	-	-	-	-	-	-	-	-	-	-	-	-	-	-	-	-	-	-	-	-	-	-	-	-	-	-	-	-
D18	Naphthalene, 2-methoxy-	Ether	C11H10O	93-04-9	sweet, naphthyl, floral, orange, blossom, acacia, neroli	0.001	2.4456	2.24749	3.36439	5.01564	3.18816	4.12051	1.44879	4.73615	2.18287	4.69591	0.922153	4.58764	4.62707	5.16933	4.78751	4.85305	5.10568	4.89605	8.59497	9.24367	10.0805	8.52102	8.21224	8.16928	13.9883	14.0142	13.2252	14.6945	13.7325	14.25	14.3165	14.4203	13.8998	13.558	12.6439	13.852
D178	(1R,3aR,5aR,9aS)-1,4,4,7-Tetramethyl-1,2,3,3a,4,5a,8,9-octahydrocyclopenta[c]benzofuran	Terpenoids	C15H24O	104188-25-2	-	-	-	-	-	-	-	-	-	-	-	-	-	-	-	-	-	-	-	-	-	-	-	-	-	-	-	-	-	-	-	-	-	-	-	-	-	-
D1772	Cyclohexanone, 4-(1,1-dimethylethyl)-	Ketone	C10H18O	98-53-3	-	15	0.000383576	0.000422908	0.000513313	0.0004421	0.000532188	0.00046038	0.000437443	0.000428917	0.000448973	0.000427599	0.000321621	0.000416154	0.000379004	0.000345782	0.000388633	0.000432483	0.000414774	0.000363398	0.000388576	0.000398996	0.00047198	0.00042635	0.000429074	0.000438199	0.000317386	0.000368184	0.000289436	0.000215751	0.000273949	0.000255445	0.000420981	0.00049353	0.000485823	0.000410765	0.000432624	0.000457812
D177	(1aR,1bS,2aS,5S,5aS,7aS)-2,2,5,7a-Tetramethyldecahydrocyclopenta[2',3']cyclobuta[1',2':3,4]benzo[1,2-b]oxirene	Terpenoids	C15H24O	104188-24-1	-	-	-	-	-	-	-	-	-	-	-	-	-	-	-	-	-	-	-	-	-	-	-	-	-	-	-	-	-	-	-	-	-	-	-	-	-	-
D1745	Propylparaben	Ester	C10H12O3	94-13-3	-	270	0.00156148	0.00195202	0.00174929	0.00212469	0.00194092	0.00211402	0.00160203	0.00192787	0.00156937	0.00159637	0.00168133	0.00178249	0.00162915	0.00167464	0.00192328	0.00210346	0.00176251	0.00169704	0.00152676	0.00199625	0.00244124	0.00162421	0.00178788	0.00196626	0.00090233	0.00101739	0.000975917	0.00112848	0.00104346	0.00097706	0.000967053	0.0009207	0.000981557	0.00101489	0.00102859	0.00099693
D171	3-(4-Isopropylphenyl)-2-methylpropionaldehyde	Aldehyde	C13H18O	103-95-7	floral, cyclamen, fresh, rhubarb, musty, green	-	-	-	-	-	-	-	-	-	-	-	-	-	-	-	-	-	-	-	-	-	-	-	-	-	-	-	-	-	-	-	-	-	-	-	-	-
D168	A-130	Ester	C14H14O3	10387-50-5	-	-	-	-	-	-	-	-	-	-	-	-	-	-	-	-	-	-	-	-	-	-	-	-	-	-	-	-	-	-	-	-	-	-	-	-	-	-
D1666	Cyclododecanone	Ketone	C12H22O	830-13-7	-	0.43	0.024634	0.0420601	0.0356061	0.0358734	0.0300532	0.0321533	0.0579575	0.0667932	0.062908	0.0611088	0.062553	0.0657752	0.115413	0.120093	0.114062	0.134846	0.109405	0.113529	0.185332	0.223689	0.27616	0.195527	0.188775	0.203257	0.415219	0.446068	0.410825	0.451083	0.428148	0.433884	0.493329	0.482218	0.496349	0.489874	0.463608	0.475453
D163	dl-Camphoroquinone	Terpenoids	C10H14O2	10373-78-1	-	-	-	-	-	-	-	-	-	-	-	-	-	-	-	-	-	-	-	-	-	-	-	-	-	-	-	-	-	-	-	-	-	-	-	-	-	-
D1612	Oxiranecarboxylic acid, 3-methyl-3-phenyl-, ethyl ester	Aldehyde	C12H14O3	77-83-8	-	2	0.0124463	0.0133546	0.0111543	0.0125482	0.012903	0.0122837	0.0292333	0.0295043	0.0268187	0.0281672	0.025882	0.0288035	0.0528746	0.056347	0.0568433	0.0618219	0.0554403	0.0575787	0.0839124	0.0927027	0.125101	0.0874673	0.0853108	0.090305	0.197619	0.208507	0.195403	0.215157	0.200919	0.209684	0.232486	0.22739	0.233986	0.231711	0.219778	0.22355
D1593	1-Decyne	Hydrocarbons	C10H18	764-93-2	-	4	0.00833061	0.0043967	0.00419784	0.00473448	0.00453779	0.00460089	0.00305323	0.00340576	0.00266297	0.0047067	0.00487287	0.00280199	0.0037443	0.00733901	0.00419515	0.00429552	0.00455915	0.00447339	0.00368867	0.00382531	0.00464108	0.00405666	0.00396393	0.00414949	0.00299567	0.00850058	0.00564305	0.00630938	0.00243892	0.00898069	0.00358199	0.00630344	0.0034349	0.00350291	0.00632124	0.00460964
D158	2-Phenoxyethyl isobutyrate	Ester	C12H16O3	103-60-6	green, fruity, waxy, apple, nuances	-	-	-	-	-	-	-	-	-	-	-	-	-	-	-	-	-	-	-	-	-	-	-	-	-	-	-	-	-	-	-	-	-	-	-	-	-
D157	Propanoic acid, 2-methyl-, 3-phenyl-2-propenyl ester	Ester	C13H16O2	103-59-3	sweet, fruity, almond, spicy, cinnamyl, tropical	-	-	-	-	-	-	-	-	-	-	-	-	-	-	-	-	-	-	-	-	-	-	-	-	-	-	-	-	-	-	-	-	-	-	-	-	-
D156	Propanoic acid, 2-methyl-, 3-phenylpropyl ester	Ester	C13H18O2	103-58-2	fruity, tropical, apricot, plum, balsamic, jammy, honey, bread, osmanthus, dry	-	-	-	-	-	-	-	-	-	-	-	-	-	-	-	-	-	-	-	-	-	-	-	-	-	-	-	-	-	-	-	-	-	-	-	-	-
D152	Propanoic acid, 2-methyl-, 2-phenylethyl ester	Ester	C12H16O2	103-48-0	floral, fruity, rose, tea, rose, peach, pastry	-	-	-	-	-	-	-	-	-	-	-	-	-	-	-	-	-	-	-	-	-	-	-	-	-	-	-	-	-	-	-	-	-	-	-	-	-
D335	Pyrazine, (2-methylpropyl)-	Heterocyclic compound	C8H12N2	29460-92-2	green, vegetable, fruity	0.4	0.011365	0.0138725	0.00959251	0.0124041	0.00966129	0.0137114	0.00671664	0.00737493	0.00535682	0.00564676	0.00677892	0.00327722	0.0106942	0.00602307	0.010969	0.00848179	0.00826837	0.0100324	0.00843928	0.0085546	0.0054993	0.0078896	0.0106135	0.00773341	0.0059835	0.00397096	0.00513557	0.00838716	0.00555182	0.00436045	0.0077858	0.0075171	0.00430392	0.00633557	0.00852371	0.0108694
GMW0249	2-Propenoic acid, 3-phenyl-, 2-methylpropyl ester	Ester	C13H16O2	122-67-8	sweet, balsamic, fruity, labdanum	-	-	-	-	-	-	-	-	-	-	-	-	-	-	-	-	-	-	-	-	-	-	-	-	-	-	-	-	-	-	-	-	-	-	-	-	-
GMW0094	Ethyl n-propyl disulfide	Sulfur compounds	C5H12S2	30453-31-7	alliaceous, garlic, green, onion	-	-	-	-	-	-	-	-	-	-	-	-	-	-	-	-	-	-	-	-	-	-	-	-	-	-	-	-	-	-	-	-	-	-	-	-	-
GMW0093	Esculetin	Heterocyclic compound	C9H6O4	305-01-1	-	-	-	-	-	-	-	-	-	-	-	-	-	-	-	-	-	-	-	-	-	-	-	-	-	-	-	-	-	-	-	-	-	-	-	-	-	-
GMW0078	.beta.-Bisabolene	Terpenoids	C15H24	495-61-4	balsamic, woody	-	-	-	-	-	-	-	-	-	-	-	-	-	-	-	-	-	-	-	-	-	-	-	-	-	-	-	-	-	-	-	-	-	-	-	-	-
GMW0066	Benzoic acid, 2-methoxy-	Acid	C8H8O3	579-75-9	-	10	0.0450156	0.0486643	0.0443156	0.0493189	0.0482051	0.0478644	0.0422325	0.0452519	0.0404266	0.0415995	0.0417103	0.0427698	0.0403803	0.0413625	0.0429654	0.0441254	0.0429023	0.04204	0.0451908	0.0503402	0.0655278	0.0475632	0.0475109	0.0490625	0.0340758	0.0381761	0.0360036	0.0369896	0.036393	0.0366874	0.0357918	0.035661	0.0376786	0.0379902	0.0377262	0.0373633
GMW0003	Ethyl Vanillin	Aldehyde	C9H10O3	121-32-4	sweet, creamy, vanilla, caramel	0.1	0.15919	0.191469	0.157347	0.172374	0.179224	0.177255	0.228412	0.236001	0.226784	0.21476	0.233924	0.231214	0.398448	0.426391	0.447727	0.477042	0.422428	0.445595	0.644751	0.718489	0.922031	0.664375	0.650771	0.682239	1.01735	1.07593	0.973013	1.10847	1.0174	1.02526	1.1057	1.0901	1.08521	1.08396	1.01538	1.04756
GMW0002	Benzaldehyde, 2,4,5-trimethoxy-	Aldehyde	C10H12O4	4460-86-0	-	35	0.000157523	0.00027557	0.000239063	0.000311266	0.000287072	0.000329489	0.000231345	0.000371299	0.000222001	0.000225504	0.000232293	0.000315295	0.000250647	0.000210736	0.000299597	0.000357661	0.000279974	0.000271092	0.000219724	0.00038708	0.000359147	0.000274155	0.000371678	0.000341576	0.000213777	0.000231	0.000223288	0.000315258	0.000248534	0.000242827	0.000229044	0.000212828	0.00021131	0.000210322	0.000189087	0.000192594
GGMW0193	Propanedioic acid, dimethyl ester	Ester	C5H8O4	108-59-8	-	4360	2.49661e-08	2.61136e-08	2.4266e-08	2.59818e-08	2.63477e-08	2.57078e-08	2.29861e-08	2.50133e-08	2.31381e-08	2.35431e-08	2.29026e-08	2.32573e-08	2.27379e-08	2.35973e-08	2.39072e-08	2.34135e-08	2.37306e-08	2.34284e-08	2.48157e-08	2.47885e-08	2.56262e-08	2.78566e-08	2.73012e-08	2.82039e-08	1.423e-07	2.00878e-07	1.68175e-07	1.89375e-07	1.32902e-07	2.12606e-07	3.23764e-07	2.60569e-07	2.45841e-07	2.79947e-07	1.81597e-07	1.92124e-07
GGMW0185	Anthracene	Aromatics	C14H10	120-12-7	-	-	-	-	-	-	-	-	-	-	-	-	-	-	-	-	-	-	-	-	-	-	-	-	-	-	-	-	-	-	-	-	-	-	-	-	-	-
GGMW0153	Methyl cis-cinnamate	Ester	C10H10O2	19713-73-6	-	-	-	-	-	-	-	-	-	-	-	-	-	-	-	-	-	-	-	-	-	-	-	-	-	-	-	-	-	-	-	-	-	-	-	-	-	-
GGMW0071	Phenol, 2,3,5,6-tetramethyl-	Phenol	C10H14O	527-35-5	-	0.01	2.40863	2.95015	2.50163	3.17081	2.01465	2.92361	2.4349	2.37815	2.2601	2.43212	2.3705	2.51762	3.14804	3.14906	1.85053	3.13638	2.34687	3.11956	3.42087	3.34475	4.73554	3.48582	3.16878	3.21936	3.30024	2.8097	3.73567	3.69697	3.63167	3.62153	3.78248	3.95283	3.94631	4.46182	3.97335	4.29791
D69	3,5-Dimethoxy-4-hydroxytoluene	Ether	C9H12O3	6638-05-7	phenol, smoky, medicinal, woody, spice, eugenol, root, caramel	-	-	-	-	-	-	-	-	-	-	-	-	-	-	-	-	-	-	-	-	-	-	-	-	-	-	-	-	-	-	-	-	-	-	-	-	-
GGMW0028	Methyl tiglate	Ester	C6H10O2	6622-76-0	-	0.13	1.42098	1.61922	1.37548	1.41317	1.43376	1.40042	1.38373	1.33685	1.33917	1.43338	1.49796	1.40694	1.39569	1.51226	1.35881	1.26129	1.38979	1.32806	1.41422	1.39042	1.34397	1.45162	1.42406	1.45081	1.29383	1.31405	1.23505	1.25718	1.26461	1.34731	1.22723	1.38243	1.39716	1.27797	1.38474	1.27737
D99	Benzoic acid, 2-(dimethylamino)-, methyl ester	Ester	C10H13NO2	10072-05-6	fruity, orange, leafy, petitgrain	-	-	-	-	-	-	-	-	-	-	-	-	-	-	-	-	-	-	-	-	-	-	-	-	-	-	-	-	-	-	-	-	-	-	-	-	-
D94	Benzenemethanethiol	Alcohol	C7H8S	100-53-8	sharp, alliaceous, onion, sulfury, garlic, horseradish, minty, coffee	3.5e-06	4739.69	4868.87	5435.52	5128.11	4968.31	5063.01	5038.35	5850	4853.94	5060.07	4670.31	5056.28	4255.77	4349.37	4152.04	4353.05	4534.77	4695.62	4521	4101.61	4074.35	4475.36	3987.74	3985.24	3299.98	3324.73	3298.09	3630.1	3846.95	3297.52	3187.06	3465.98	3584.82	3497.75	3307.02	3685.62
D846	Diethyl suberate	Ester	C12H22O4	2050-23-9	-	641	3.18826e-05	3.70013e-05	3.1929e-05	3.76232e-05	3.90753e-05	3.62358e-05	3.51959e-05	3.50271e-05	2.67858e-05	2.99324e-05	3.76532e-05	3.40637e-05	2.90994e-05	2.88584e-05	3.5628e-05	3.83106e-05	3.30113e-05	2.81009e-05	3.27195e-05	4.14197e-05	5.33123e-05	3.65374e-05	4.10108e-05	3.84305e-05	3.28651e-05	2.70062e-05	2.73266e-05	3.92957e-05	3.5699e-05	3.24643e-05	2.70198e-05	2.73143e-05	3.43306e-05	3.29522e-05	3.57184e-05	3.33894e-05
D83	Hexanoic acid, 3,7-dimethyl-2,6-octadienyl ester, (E)-	Ester	C16H28O2	10032-02-7	rose, geranium, fruity, waxy	0.15	0.0504669	0.0657607	0.0737792	0.0702806	0.054967	0.0713851	0.0434398	0.0579882	0.0457282	0.046872	0.0745154	0.0505402	0.0799442	0.0593409	0.0834789	0.0787225	0.07825	0.0483554	0.00847825	0.00846896	0.00875515	0.00951717	0.00932739	0.00963581	0.0935762	0.0620552	0.0794581	0.118705	0.10893	0.0489367	0.0807449	0.0807689	0.0513029	0.0863542	0.0829799	0.0454727
D82	2-Nonynoic acid, ethyl ester	Ester	C11H18O2	10031-92-2	violet, leafy, green, cucumber, floral	-	-	-	-	-	-	-	-	-	-	-	-	-	-	-	-	-	-	-	-	-	-	-	-	-	-	-	-	-	-	-	-	-	-	-	-	-
D81	2-Furanpropanoic acid, ethyl ester	Ester	C9H12O3	10031-90-0	pineapple, fruity, spicy, jammy	-	-	-	-	-	-	-	-	-	-	-	-	-	-	-	-	-	-	-	-	-	-	-	-	-	-	-	-	-	-	-	-	-	-	-	-	-
D767	Benzenepropanal, 4-(1,1-dimethylethyl)-	Aldehyde	C13H18O	18127-01-0	-	0.1	0.414357	0.423896	0.397978	0.411854	0.42446	0.415332	0.947478	0.970445	0.884451	0.927662	0.896753	0.972737	1.74181	1.86268	1.86891	2.10529	1.79452	1.91919	2.91677	3.33332	4.48364	3.03438	3.03491	3.25387	7.60847	8.03505	7.42255	8.34118	7.84394	7.80799	9.27739	9.01509	9.31265	9.26092	8.74709	8.92527
D74	4-Acetylanisole	Ketone	C9H10O2	100-06-1	sweet, hawthorn, anisic, balsamic, acacia	-	-	-	-	-	-	-	-	-	-	-	-	-	-	-	-	-	-	-	-	-	-	-	-	-	-	-	-	-	-	-	-	-	-	-	-	-
GMW0105	3-Undecanone	Ketone	C11H22O	2216-87-7	-	0.0083	1.1512	1.41182	1.32402	1.37179	1.3124	1.35378	1.43768	1.58371	1.43328	1.43105	1.4116	1.45415	1.43419	1.44235	1.18055	1.42742	1.32186	1.42072	1.637	1.86886	2.38752	1.62235	1.62001	1.70307	1.52245	1.47124	1.68411	1.66895	1.53322	1.40505	1.39482	1.43147	1.55104	1.61336	1.61172	1.58529
GMW0131	2,4-Dimethylcyclohex-3-ene-1-carbaldehyde	Aldehyde	C9H14O	68039-49-6	green, aldehydic, leafy, cortex, tart, floral, peel	-	-	-	-	-	-	-	-	-	-	-	-	-	-	-	-	-	-	-	-	-	-	-	-	-	-	-	-	-	-	-	-	-	-	-	-	-
GMW0135	Benzothiazole, 2-methyl-	Heterocyclic compound	C8H7NS	120-75-2	-	0.0075	1.30289	1.15972	1.32546	1.17285	1.3661	1.24592	1.28778	1.24907	1.06932	1.2739	1.42857	1.33375	1.33242	1.44216	0.7474	1.52192	1.32796	1.34805	1.42806	1.42104	2.10881	1.59541	1.63503	1.91575	0.892869	0.950371	0.523207	1.21628	1.06512	1.14018	0.876085	0.65878	1.02025	0.922835	0.84303	0.883674
GMW0246	Benzeneacetic acid, butyl ester	Ester	C12H16O2	122-43-0	rose, honey, chocolate	-	-	-	-	-	-	-	-	-	-	-	-	-	-	-	-	-	-	-	-	-	-	-	-	-	-	-	-	-	-	-	-	-	-	-	-	-
GMW0245	Oxiranecarboxylic acid, 3-phenyl-, ethyl ester	Ester	C11H12O3	121-39-1	sweet, strawberry, berry, floral, tropical	8.5	0.00113024	0.00129015	0.00110532	0.0014598	0.00135727	0.0013291	0.00109123	0.00125784	0.00109965	0.00113454	0.00118775	0.00119535	0.00109287	0.00112339	0.00123694	0.00137172	0.00114758	0.00105997	0.00122107	0.00141633	0.00167843	0.00135552	0.00121247	0.00127336	0.00111776	0.00120482	0.0010581	0.00124421	0.00120374	0.00127401	0.00124239	0.00111572	0.0012631	0.00124973	0.00124479	0.00116344
GMW0242	1,3-Benzodioxole-5-propanal, .alpha.-methyl-	Aldehyde	C11H12O3	1205-17-0	watery, fresh, green, ozonous, cyclamen, hay	0.0011	5.44177	6.65907	5.81746	7.03634	6.2151	5.74879	8.65917	7.7477	8.66665	8.9155	7.25564	8.46705	14.6926	14.5085	15.5629	17.1088	14.8898	16.7239	22.6144	25.3422	37.8729	23.9081	25.7399	28.9233	55.1999	58.6912	54.5825	60.8189	56.4148	56.8868	75.1005	73.5205	74.1278	73.9232	70.6172	72.3398
GMW0223	Ethanone, 1-(3,4-dimethoxyphenyl)-	Ketone	C10H12O3	1131-62-0	sweet, woody, floral	-	-	-	-	-	-	-	-	-	-	-	-	-	-	-	-	-	-	-	-	-	-	-	-	-	-	-	-	-	-	-	-	-	-	-	-	-
GMW0220	Benzaldehyde dimethyl acetal	Ether	C9H12O2	1125-88-8	green, earthy, root, nutty, vegetable, spinach, potato, fungal, almond, winey	-	-	-	-	-	-	-	-	-	-	-	-	-	-	-	-	-	-	-	-	-	-	-	-	-	-	-	-	-	-	-	-	-	-	-	-	-
GMW0217	Benzeneethanol, .beta.-methyl-	Alcohol	C9H12O	1123-85-9	green, spicy, hyacinth, balsamic, lilac, honeysuckle	-	-	-	-	-	-	-	-	-	-	-	-	-	-	-	-	-	-	-	-	-	-	-	-	-	-	-	-	-	-	-	-	-	-	-	-	-
GMW0208	2-Nonynoic acid, methyl ester	Ester	C10H16O2	111-80-8	floral, green, violet, leafy, melon, cucumber	-	-	-	-	-	-	-	-	-	-	-	-	-	-	-	-	-	-	-	-	-	-	-	-	-	-	-	-	-	-	-	-	-	-	-	-	-
GMW0207	2-Nonenoic acid, methyl ester	Ester	C10H18O2	111-79-5	sweet, green, waxy, violet, pear, fruity, melon, vegetable	-	-	-	-	-	-	-	-	-	-	-	-	-	-	-	-	-	-	-	-	-	-	-	-	-	-	-	-	-	-	-	-	-	-	-	-	-
GMW0200	Sorbic Acid	Acid	C6H8O2	110-44-1	-	135	0.000152321	0.000164761	0.000151025	0.000166983	0.000163171	0.000161734	0.000151081	0.000173412	0.000142731	0.000154957	0.000146065	0.000150194	7.84585e-05	8.09633e-05	0.0001064	9.86888e-05	8.0725e-05	7.8643e-05	0.000110361	9.35993e-05	9.28228e-05	0.000118209	9.81125e-05	0.00010906	6.91598e-05	7.91257e-05	8.5374e-05	7.49458e-05	7.68255e-05	7.25827e-05	0.00011989	0.000120758	0.000127342	0.000135782	0.00014682	0.000126596
GMW0178	Octanal, 7-hydroxy-3,7-dimethyl-	Aldehyde	C10H20O2	107-75-5	floral, lily, sweet, green, waxy, tropical, melon	1	0.0157254	0.0175489	0.0151637	0.0173092	0.0179559	0.0183008	0.0184568	0.0172675	0.0153253	0.0188224	0.0166667	0.0173674	0.0145551	0.0143506	0.0137206	0.0152679	0.0131213	0.0164238	0.017553	0.0175334	0.0234177	0.01783	0.0176254	0.0177467	0.0118024	0.013528	0.0127687	0.0136378	0.0125025	0.0115486	0.0148179	0.0164086	0.0150339	0.0147403	0.0148707	0.0153887
GMW0177	1,7-Octanediol, 3,7-dimethyl-	Alcohol	C10H22O2	107-74-4	mild, clean, floral, lily, green, peony	5	0.00758307	0.00749237	0.0071004	0.00771956	0.00775265	0.00754293	0.00676768	0.00750525	0.00662624	0.00696438	0.00618151	0.00707991	0.00585233	0.0063878	0.00645422	0.00694206	0.00604906	0.0066334	0.00590055	0.00623253	0.00818925	0.00663143	0.00628212	0.00669313	0.0039313	0.00408777	0.00383079	0.00408816	0.00379708	0.00375813	0.0040372	0.00406595	0.00382557	0.00428687	0.00389206	0.0039024
GMW0166	Geranyl propionate	Ester	C13H22O2	105-90-8	floral, fresh, waxy, fruity, rose, tropical	0.01	0.110529	0.115609	0.107429	0.115025	0.116645	0.113812	0.101763	0.110738	0.102436	0.104229	0.101393	0.102964	7.51837	0.522343	8.48232	0.68206	8.32805	0.537942	1.21065	1.18049	1.75498	1.12764	1.22577	1.3709	3.3016	3.37304	3.12808	3.57868	3.23063	3.32448	4.00876	3.34807	3.57431	4.0567	3.13236	3.77209
GMW0159	Benzenepentanol	Alcohol	C11H16O	10521-91-2	floral, carnation, rose, lemon, verbena	-	-	-	-	-	-	-	-	-	-	-	-	-	-	-	-	-	-	-	-	-	-	-	-	-	-	-	-	-	-	-	-	-	-	-	-	-
GMW0157	Ethyl 2-octynoate	Ester	C10H16O2	10519-20-7	violet, leafy, oily, waxy	-	-	-	-	-	-	-	-	-	-	-	-	-	-	-	-	-	-	-	-	-	-	-	-	-	-	-	-	-	-	-	-	-	-	-	-	-
GMW0155	Pyridine, 5-ethyl-2-methyl-	Heterocyclic compound	C8H11N	104-90-5	nutty, strong, raw, potato, roasted, earthy	0.019	13.797	14.3935	13.8339	14.4546	15.993	14.9935	12.7117	15.6872	13.69	13.3227	12.8883	13.1117	14.8398	15.8569	15.802	16.2471	16.7654	16.9341	15.209	14.9416	17.5113	17.1477	16.6432	15.958	4.15732	5.58227	4.94934	5.17811	4.79827	5.33273	5.60888	5.23745	5.21009	5.63988	5.59719	5.5024
GMW0147	Atractylodin	Heterocyclic compound	C13H10O	55290-63-6	-	-	-	-	-	-	-	-	-	-	-	-	-	-	-	-	-	-	-	-	-	-	-	-	-	-	-	-	-	-	-	-	-	-	-	-	-	-
D73	2-Propenoic acid, 3-phenyl-, 1-methylethyl ester	Ester	C12H14O2	7780-06-5	balsamic, fruity, tropical, cinnamyl, berry, strawberry, peach	-	-	-	-	-	-	-	-	-	-	-	-	-	-	-	-	-	-	-	-	-	-	-	-	-	-	-	-	-	-	-	-	-	-	-	-	-
D346	Methyl 6,6-dimethylbicyclo[3.1.1]hept-2-ene-2-carboxylate	Ester	C11H16O2	30649-97-9	-	-	-	-	-	-	-	-	-	-	-	-	-	-	-	-	-	-	-	-	-	-	-	-	-	-	-	-	-	-	-	-	-	-	-	-	-	-
D375	4H-Inden-4-one, 1,2,3,5,6,7-hexahydro-1,1,2,3,3-pentamethyl-	Ketone	C14H22O	33704-61-9	rich, spicy, musky, woody, clean	-	-	-	-	-	-	-	-	-	-	-	-	-	-	-	-	-	-	-	-	-	-	-	-	-	-	-	-	-	-	-	-	-	-	-	-	-
D402	Piperitenone oxide	Ketone	C10H14O2	35178-55-3	herbal, minty	-	-	-	-	-	-	-	-	-	-	-	-	-	-	-	-	-	-	-	-	-	-	-	-	-	-	-	-	-	-	-	-	-	-	-	-	-
D401	2-Isopropyl-5-methylhex-2-enal	Aldehyde	C10H18O	35158-25-9	herbal, lavender, woody, green, blueberry, tomato	-	-	-	-	-	-	-	-	-	-	-	-	-	-	-	-	-	-	-	-	-	-	-	-	-	-	-	-	-	-	-	-	-	-	-	-	-
D393	1,3-Cyclohexadiene-1-carboxylic acid, 2,6,6-trimethyl-, ethyl ester	Ester	C12H18O2	35044-59-8	fresh, natural, herbal, damascone, rose, apple, woody	-	-	-	-	-	-	-	-	-	-	-	-	-	-	-	-	-	-	-	-	-	-	-	-	-	-	-	-	-	-	-	-	-	-	-	-	-
D390	Cyclopentanone, 2-(2-hexenyl)-	Ketone	C11H18O	34687-46-2	oily, jasmin, coconut, milky, dairy, floral	-	-	-	-	-	-	-	-	-	-	-	-	-	-	-	-	-	-	-	-	-	-	-	-	-	-	-	-	-	-	-	-	-	-	-	-	-
D388	Butanoic acid, 1-phenylethyl ester	Ester	C12H16O2	3460-44-4	sweet, fruity, berry, juicy, earthy, floral, jasmin	-	-	-	-	-	-	-	-	-	-	-	-	-	-	-	-	-	-	-	-	-	-	-	-	-	-	-	-	-	-	-	-	-	-	-	-	-
D387	1-Hexanol, 3,5,5-trimethyl-	Alcohol	C9H20O	3452-97-9	grassy, green, weedy, floral, earthy, aldehydic, hay, straw, leafy	-	-	-	-	-	-	-	-	-	-	-	-	-	-	-	-	-	-	-	-	-	-	-	-	-	-	-	-	-	-	-	-	-	-	-	-	-
D386	Squamulosone	Terpenoids	C15H22O	34413-94-0	-	-	-	-	-	-	-	-	-	-	-	-	-	-	-	-	-	-	-	-	-	-	-	-	-	-	-	-	-	-	-	-	-	-	-	-	-	-
D384	Trisulfide, methyl 2-propenyl	Sulfur compounds	C4H8S3	34135-85-8	alliaceous, creamy, garlic, onion	-	-	-	-	-	-	-	-	-	-	-	-	-	-	-	-	-	-	-	-	-	-	-	-	-	-	-	-	-	-	-	-	-	-	-	-	-
D383	11-Hexadecen-1-ol, acetate, (Z)-	Ester	C18H34O2	34010-21-4	-	-	-	-	-	-	-	-	-	-	-	-	-	-	-	-	-	-	-	-	-	-	-	-	-	-	-	-	-	-	-	-	-	-	-	-	-	-
D380	3(2H)-Furanone, 2-hexyl-5-methyl-	Ketone	C11H18O2	33922-66-6	-	0.5	0.0481866	0.0512109	0.0477394	0.0548123	0.0560993	0.0552729	0.053557	0.0574874	0.0533427	0.0530803	0.055346	0.0578583	0.0434414	0.0471687	0.0496218	0.0530807	0.047804	0.0442504	0.0554601	0.0641831	0.0947798	0.0588927	0.0605703	0.0661943	0.0511792	0.0565577	0.0504508	0.0555574	0.0538705	0.0534821	0.0495159	0.047845	0.0542364	0.0532594	0.0505686	0.0524785
D60	Piperonyl isobutyrate	Ester	C12H14O4	5461-08-5	fruity, berry, jammy, plum, tropical, heliotrope, powdery	-	-	-	-	-	-	-	-	-	-	-	-	-	-	-	-	-	-	-	-	-	-	-	-	-	-	-	-	-	-	-	-	-	-	-	-	-
D369	Kessane	Terpenoids	C15H26O	3321-66-2	-	-	-	-	-	-	-	-	-	-	-	-	-	-	-	-	-	-	-	-	-	-	-	-	-	-	-	-	-	-	-	-	-	-	-	-	-	-
D366	3-Octen-2-one, 7-methyl-	Ketone	C9H16O	33046-81-0	fatty, oily, lactonic, nutty, meaty, tallow, fatty	-	-	-	-	-	-	-	-	-	-	-	-	-	-	-	-	-	-	-	-	-	-	-	-	-	-	-	-	-	-	-	-	-	-	-	-	-
D364	2-Ethoxy-3-methylpyrazine	Heterocyclic compound	C7H10N2O	32737-14-7	hazelnut, roasted, almond, pineapple, earthy	0.0008	19.0615	20.0304	21.2446	19.8187	17.2336	21.6041	18.0311	22.6951	33.8352	19.822	19.2967	18.3223	18.2231	18.5781	33.9674	19.7162	17.7392	21.6672	20.9295	19.2988	22.6367	22.7195	40.2223	20.5649	20.1901	41.4534	19.6672	20.009	23.4639	40.0384	40.0588	22.5122	19.7977	21.8573	23.2662	22.3831
D358	4-tert-Butylcyclohexyl acetate	Ester	C12H22O2	32210-23-4	woody, cedary, floral, oily, herbal, balsamic, green, fruity	0.86	3.31623	3.37862	3.16413	3.43371	3.4413	3.29208	3.00986	3.19241	2.85621	3.03005	2.84715	3.07554	2.729	2.89475	2.90972	3.22327	2.8311	3.00073	2.69392	2.89487	3.67359	2.93364	2.81666	2.9914	1.72807	1.84356	1.74202	1.87198	1.79786	1.79102	1.83483	1.8207	1.81655	1.88502	1.78235	1.81704
D355	2,6-Octadienenitrile, 3,7-dimethyl-, (Z)-	Nitrogen compounds	C10H15N	31983-27-4	citral, lemon, aldehydic, metallic	-	-	-	-	-	-	-	-	-	-	-	-	-	-	-	-	-	-	-	-	-	-	-	-	-	-	-	-	-	-	-	-	-	-	-	-	-
D354	3-Cyclohexene-1-carboxaldehyde, 4-(4-hydroxy-4-methylpentyl)-	Aldehyde	C13H22O2	31906-04-4	floral, muguet, cyclamen, rhubarb, woody	-	-	-	-	-	-	-	-	-	-	-	-	-	-	-	-	-	-	-	-	-	-	-	-	-	-	-	-	-	-	-	-	-	-	-	-	-
D352	2-Butenal, 2-methyl-4-(2,6,6-trimethyl-1-cyclohexen-1-yl)-	Aldehyde	C14H22O	3155-71-3	dry, sweet, tobacco, nutty, violet, boronia, dry leaf, hay, woody, acorn	-	-	-	-	-	-	-	-	-	-	-	-	-	-	-	-	-	-	-	-	-	-	-	-	-	-	-	-	-	-	-	-	-	-	-	-	-
D35	2-Ethoxy-4-methylphenol	Phenol	C9H12O2	2563-07-7	vanilla, woody, spicy, guaiacol	-	-	-	-	-	-	-	-	-	-	-	-	-	-	-	-	-	-	-	-	-	-	-	-	-	-	-	-	-	-	-	-	-	-	-	-	-
D349	8-Cyclohexadecen-1-one	Ketone	C16H28O	3100-36-5	musky, laundered cloth, dry balsamic, waxy, animalic, floral, tobacco	-	-	-	-	-	-	-	-	-	-	-	-	-	-	-	-	-	-	-	-	-	-	-	-	-	-	-	-	-	-	-	-	-	-	-	-	-
D347	n-Capric acid isobutyl ester	Ester	C14H28O2	30673-38-2	oily, sweet, brandy, apricot, fermented, cognac	-	-	-	-	-	-	-	-	-	-	-	-	-	-	-	-	-	-	-	-	-	-	-	-	-	-	-	-	-	-	-	-	-	-	-	-	-
D404	Hexahydro-3-butylphthalide	Heterocyclic compound	C12H20O2	3553-34-2	-	-	-	-	-	-	-	-	-	-	-	-	-	-	-	-	-	-	-	-	-	-	-	-	-	-	-	-	-	-	-	-	-	-	-	-	-	-
D407	7-Octen-4-ol, 2-methyl-6-methylene-, (S)-	Terpenoids	C10H18O	35628-05-8	-	-	-	-	-	-	-	-	-	-	-	-	-	-	-	-	-	-	-	-	-	-	-	-	-	-	-	-	-	-	-	-	-	-	-	-	-	-
D41	4-(p-Acetoxyphenyl)-2-butanone	Ketone	C12H14O3	3572-06-3	berry, jammy, raspberry, blueberry	-	-	-	-	-	-	-	-	-	-	-	-	-	-	-	-	-	-	-	-	-	-	-	-	-	-	-	-	-	-	-	-	-	-	-	-	-
D58	Butanoic acid, 3-methyl-, 3-phenylpropyl ester	Ester	C14H20O2	5452-07-3	fruity, strawberry, raspberry, plum	-	-	-	-	-	-	-	-	-	-	-	-	-	-	-	-	-	-	-	-	-	-	-	-	-	-	-	-	-	-	-	-	-	-	-	-	-
D56	2-Buten-1-ol, 3-methyl-, benzoate	Ester	C12H14O2	5205-11-8	balsamic, fruity, chocolate, ylang-ylang, tea	-	-	-	-	-	-	-	-	-	-	-	-	-	-	-	-	-	-	-	-	-	-	-	-	-	-	-	-	-	-	-	-	-	-	-	-	-
D55	3-Methyl-3-buten-1-ol, acetate	Ester	C7H12O2	5205-07-2	fruity	-	-	-	-	-	-	-	-	-	-	-	-	-	-	-	-	-	-	-	-	-	-	-	-	-	-	-	-	-	-	-	-	-	-	-	-	-
D47	Undecanol-4	Alcohol	C11H24O	4272-06-4	-	0.041	0.136677	0.164475	0.154169	0.142446	0.164696	0.162945	0.136352	0.173054	0.117398	0.140493	0.148795	0.141152	0.158857	0.149297	0.130865	0.145076	0.160822	0.158929	0.155401	0.12554	0.186189	0.169219	0.168275	0.142497	0.119116	0.170284	0.133996	0.162481	0.14677	0.117345	0.165884	0.14941	0.185509	0.154581	0.167309	0.176237
D457	1-Hexanol, 5-methyl-2-(1-methylethyl)-, acetate	Ester	C12H24O2	40853-55-2	-	-	-	-	-	-	-	-	-	-	-	-	-	-	-	-	-	-	-	-	-	-	-	-	-	-	-	-	-	-	-	-	-	-	-	-	-	-
D456	8-Dodecen-1-ol, (Z)-	Alcohol	C12H24O	40642-40-8	-	-	-	-	-	-	-	-	-	-	-	-	-	-	-	-	-	-	-	-	-	-	-	-	-	-	-	-	-	-	-	-	-	-	-	-	-	-
D450	Isopimara-9(11),15-diene	Terpenoids	C20H32	39702-28-8	-	-	-	-	-	-	-	-	-	-	-	-	-	-	-	-	-	-	-	-	-	-	-	-	-	-	-	-	-	-	-	-	-	-	-	-	-	-
D448	Furfuryl heptanoate	Ester	C12H18O3	39481-28-2	green	-	-	-	-	-	-	-	-	-	-	-	-	-	-	-	-	-	-	-	-	-	-	-	-	-	-	-	-	-	-	-	-	-	-	-	-	-
D445	Furfuryl hexanoate	Ester	C11H16O3	39252-02-3	green, fatty, musty, waxy	-	-	-	-	-	-	-	-	-	-	-	-	-	-	-	-	-	-	-	-	-	-	-	-	-	-	-	-	-	-	-	-	-	-	-	-	-
D444	2-Furancarboxylic acid, octyl ester	Ester	C13H20O3	39251-88-2	oily, waxy, earthy, mushroom, creamy, tallow	-	-	-	-	-	-	-	-	-	-	-	-	-	-	-	-	-	-	-	-	-	-	-	-	-	-	-	-	-	-	-	-	-	-	-	-	-
D443	2-Furancarboxylic acid, hexyl ester	Ester	C11H16O3	39251-86-0	floral, waxy, green, sweet, pear, apple	-	-	-	-	-	-	-	-	-	-	-	-	-	-	-	-	-	-	-	-	-	-	-	-	-	-	-	-	-	-	-	-	-	-	-	-	-
D436	Methyl p-tolyloxyacetate	Ester	C10H12O3	38768-63-7	wild, fruity, fatty	-	-	-	-	-	-	-	-	-	-	-	-	-	-	-	-	-	-	-	-	-	-	-	-	-	-	-	-	-	-	-	-	-	-	-	-	-
D429	2-Methyl-6-(p-tolyl)hept-2-en-4-ol	Terpenoids	C15H22O	38142-57-3	-	-	-	-	-	-	-	-	-	-	-	-	-	-	-	-	-	-	-	-	-	-	-	-	-	-	-	-	-	-	-	-	-	-	-	-	-	-
D428	6-Methyl-2-(4-methylcyclohex-3-en-1-yl)hepta-1,5-dien-4-ol	Terpenoids	C15H24O	38142-56-2	-	-	-	-	-	-	-	-	-	-	-	-	-	-	-	-	-	-	-	-	-	-	-	-	-	-	-	-	-	-	-	-	-	-	-	-	-	-
D425	3-Cyclohexene-1-carboxaldehyde, 4-(4-methyl-3-pentenyl)-	Aldehyde	C13H20O	37677-14-8	citrus, grassy, aldehydic, floral, marine	-	-	-	-	-	-	-	-	-	-	-	-	-	-	-	-	-	-	-	-	-	-	-	-	-	-	-	-	-	-	-	-	-	-	-	-	-
D424	5-Cyclohexadecen-1-one	Ketone	C16H28O	37609-25-9	musky, amber, civet	0.116	0.299191	0.363383	0.315661	0.316892	0.295311	0.287874	0.231481	0.241443	0.196491	0.208807	0.190119	0.201413	0.25615	0.252014	0.260183	0.259504	0.235435	0.253504	0.444258	0.424617	0.637583	0.472842	0.487212	0.544662	0.408657	0.38644	0.372319	0.457435	0.453298	0.363104	0.291086	0.300014	0.26513	0.272416	0.261331	0.260907
D423	Benzyl tiglate	Ester	C12H14O2	37526-88-8	balsamic, earthy, mushroom, vegetable, plastic, cortex, almond, nutty	-	-	-	-	-	-	-	-	-	-	-	-	-	-	-	-	-	-	-	-	-	-	-	-	-	-	-	-	-	-	-	-	-	-	-	-	-
D419	2-Penten-1-ol, 2-methyl-5-(2-methyl-3-methylenebicyclo[2.2.1]hept-2-yl)-, [1S-[1.alpha.,2.alpha.(E),4.alpha.]]-	Terpenoids	C15H24O	37172-32-0	-	-	-	-	-	-	-	-	-	-	-	-	-	-	-	-	-	-	-	-	-	-	-	-	-	-	-	-	-	-	-	-	-	-	-	-	-	-
D415	Isobutyric acid, 2-methylphenyl ester	Ester	C11H14O2	36438-54-7	phenol, berry, medicinal	-	-	-	-	-	-	-	-	-	-	-	-	-	-	-	-	-	-	-	-	-	-	-	-	-	-	-	-	-	-	-	-	-	-	-	-	-
D413	4-Methyl-5-nonanone	Ketone	C10H20O	35900-26-6	-	-	-	-	-	-	-	-	-	-	-	-	-	-	-	-	-	-	-	-	-	-	-	-	-	-	-	-	-	-	-	-	-	-	-	-	-	-
D411	4-Methylpentyl 2-methylbutanoate	Ester	C11H22O2	35852-40-5	-	-	-	-	-	-	-	-	-	-	-	-	-	-	-	-	-	-	-	-	-	-	-	-	-	-	-	-	-	-	-	-	-	-	-	-	-	-
NMW0102	Guvacoline	Heterocyclic compound	C7H11NO2	495-19-2	-	-	-	-	-	-	-	-	-	-	-	-	-	-	-	-	-	-	-	-	-	-	-	-	-	-	-	-	-	-	-	-	-	-	-	-	-	-
NMW0110	Picolinamide	Heterocyclic compound	C6H6N2O	1452-77-3	-	-	-	-	-	-	-	-	-	-	-	-	-	-	-	-	-	-	-	-	-	-	-	-	-	-	-	-	-	-	-	-	-	-	-	-	-	-
XMW0025	Paroxypropione	Ketone	C9H10O2	70-70-2	phenol	-	-	-	-	-	-	-	-	-	-	-	-	-	-	-	-	-	-	-	-	-	-	-	-	-	-	-	-	-	-	-	-	-	-	-	-	-
QWMW1253	2-Butenoic acid, 2-methylpropyl ester	Ester	C8H14O2	589-66-2	fruity, dry, tropical, rummy, ripe green pear	-	-	-	-	-	-	-	-	-	-	-	-	-	-	-	-	-	-	-	-	-	-	-	-	-	-	-	-	-	-	-	-	-	-	-	-	-
QWMW1323	6-Undecanone	Ketone	C11H22O	927-49-1	-	0.085	1.08892	1.21105	1.17497	0.903322	1.12261	1.05702	1.20518	1.40049	1.24541	1.2687	1.18522	1.2694	0.819029	0.877018	1.16892	1.25747	0.953146	0.907259	0.899885	1.13275	1.22941	0.95932	0.83353	1.00891	0.809164	1.15546	0.988902	0.94285	0.957513	1.14374	1.16897	1.19749	1.20942	1.25343	1.22887	1.19375
QWMW1320	1-Butanol, 3-methyl-, benzoate	Ester	C12H16O2	94-46-2	-	0.25	0.0173309	0.0224486	0.018693	0.0172842	0.0181506	0.0193976	0.0165173	0.0210288	0.0181997	0.0166021	0.0166322	0.0160171	0.0150791	0.01713	0.0173563	0.0223998	0.00986858	0.0189154	0.0244784	0.0273925	0.0392414	0.0239982	0.0293383	0.0270631	0.0234258	0.0268533	0.0261881	0.0263433	0.028272	0.0242418	0.0310296	0.0288996	0.0307057	0.0307146	0.030376	0.0293317
QWMW1287	Non-8-enal	Aldehyde	C9H16O	39770-04-2	smoky, plastic	0.0002	561.215	574.799	580.668	548.437	552.753	549.647	571.255	650.193	550.675	585.714	565.353	564.408	537.061	545.377	542.075	527.888	525.934	563.368	530.815	506.532	542.87	549.334	514.001	509.901	464.613	499.874	491.796	479.959	512.429	462.544	457.775	467.303	445.472	490.44	494.427	490.027
QWMW1279	Cyclohexanemethanol, .alpha.,.alpha.,4-trimethyl-	Alcohol	C10H20O	498-81-7	sweet, pine, terpenic, lime, woody	-	-	-	-	-	-	-	-	-	-	-	-	-	-	-	-	-	-	-	-	-	-	-	-	-	-	-	-	-	-	-	-	-	-	-	-	-
QWMW1274	5-Hexyl-5-methyloxolan-2-one	Ester	C11H20O2	7011-83-8	fresh, waxy, coconut, jasmin, spicy, natural	-	-	-	-	-	-	-	-	-	-	-	-	-	-	-	-	-	-	-	-	-	-	-	-	-	-	-	-	-	-	-	-	-	-	-	-	-
QWMW1271	2(3H)-Furanone, dihydro-4-methyl-5-pentyl-	Ketone	C10H18O2	33673-62-0	waxy, lactonic, metallic, tuberose, plum	-	-	-	-	-	-	-	-	-	-	-	-	-	-	-	-	-	-	-	-	-	-	-	-	-	-	-	-	-	-	-	-	-	-	-	-	-
QWMW1267	Acetic acid, phenyl-, isopentyl ester	Ester	C13H18O2	102-19-2	sweet, honey, cocoa, balsamic, chocolate, castoreum, animalic	-	-	-	-	-	-	-	-	-	-	-	-	-	-	-	-	-	-	-	-	-	-	-	-	-	-	-	-	-	-	-	-	-	-	-	-	-
QWMW1255	Muscone	Ketone	C16H30O	541-91-3	sweet, musky, animalic, powdery, fatty, natural	0.0098	1.55714	2.00127	1.67904	1.99941	1.86444	1.75791	1.60194	1.9218	1.55367	1.67296	1.59836	1.68	1.40116	1.60227	1.68371	1.83969	1.63998	1.50085	1.71223	2.09572	2.51906	2.08135	2.02533	2.15867	1.95683	2.07777	1.97735	2.20747	2.02911	1.89437	2.05997	2.0989	2.15973	2.29993	2.24979	2.03434
QWMW1252	Octanoic acid, 2-phenylethyl ester	Ester	C16H24O2	5457-70-5	sweet, waxy, green, cocoa, fruity	10	0.0725294	0.0871571	0.0840146	0.0929197	0.0812153	0.0835205	0.0742258	0.0971604	0.0672795	0.0762608	0.0725797	0.0733846	0.0754966	0.0697699	0.0907253	0.107243	0.0806685	0.0784972	0.0738157	0.0814401	0.125242	0.0819386	0.0891895	0.102554	0.0930209	0.0798559	0.0771084	0.102453	0.093279	0.0931359	0.0933569	0.0860985	0.0934463	0.0940524	0.0919049	0.0851584
QWMW1220	Benzyl methyl disulfide	Ether	C8H10S2	699-10-5	sulfury, cabbage, vegetable, green, metallic	-	-	-	-	-	-	-	-	-	-	-	-	-	-	-	-	-	-	-	-	-	-	-	-	-	-	-	-	-	-	-	-	-	-	-	-	-
QWMW1251	2-Propen-1-ol, 3-phenyl-, propanoate	Ester	C12H14O2	103-56-0	sweet, spicy, fruity, balsamic, grape	-	-	-	-	-	-	-	-	-	-	-	-	-	-	-	-	-	-	-	-	-	-	-	-	-	-	-	-	-	-	-	-	-	-	-	-	-
QWMW1248	2(3H)-Furanone, 5-methyl-	Ketone	C5H6O2	591-12-8	sweet, nutty, tonka, coumarin, tobacco	-	-	-	-	-	-	-	-	-	-	-	-	-	-	-	-	-	-	-	-	-	-	-	-	-	-	-	-	-	-	-	-	-	-	-	-	-
QWMW1247	4-(3,4-Methylenedioxyphenyl)-2-butanone	Ketone	C11H12O3	55418-52-5	sweet, raspberry, heliotrope, powdery, cotton, candy	-	-	-	-	-	-	-	-	-	-	-	-	-	-	-	-	-	-	-	-	-	-	-	-	-	-	-	-	-	-	-	-	-	-	-	-	-
QWMW1245	Butanoic acid, 3-phenyl-2-propenyl ester	Ester	C13H16O2	103-61-7	soft, fruity, winey, cognac, cinnamyl, balsamic	159	0.00136397	0.00162832	0.00150639	0.0017951	0.00164998	0.00174467	0.001359	0.00158149	0.00133813	0.00137763	0.00139137	0.00148629	0.00139152	0.00142389	0.0016179	0.00174138	0.00150178	0.00144608	0.00125305	0.00158547	0.00183462	0.00129052	0.00136978	0.00149066	0.000625277	0.000629811	0.000604486	0.000708644	0.000661651	0.000615867	0.000607469	0.000592248	0.00063065	0.000644777	0.000637195	0.000626129
QWMW1241	Phenol, 4-(ethoxymethyl)-2-methoxy-	Phenol	C10H14O3	13184-86-6	alcoholic, rummy, sweet, chocolate, creamy, vanilla, spicy, nutmeg, smoky	-	-	-	-	-	-	-	-	-	-	-	-	-	-	-	-	-	-	-	-	-	-	-	-	-	-	-	-	-	-	-	-	-	-	-	-	-
QWMW1230	Ethylvanillin, 2-methylpropionate	Ester	C13H16O4	188417-26-7	sweet, creamy, vanilla, chocolate, milky	-	-	-	-	-	-	-	-	-	-	-	-	-	-	-	-	-	-	-	-	-	-	-	-	-	-	-	-	-	-	-	-	-	-	-	-	-
QWMW1227	2H-1-Benzopyran-2-one, 6-methyl-	Ester	C10H8O2	92-48-8	sweet, coconut, vanilla, creamy, powdery, floral	-	-	-	-	-	-	-	-	-	-	-	-	-	-	-	-	-	-	-	-	-	-	-	-	-	-	-	-	-	-	-	-	-	-	-	-	-
QWMW1223	Phenol, 2,6-dimethyl-	Phenol	C8H10O	576-26-1	sweet, medicinal, phenol, root, coffee	0.4	0.295028	0.318008	0.301168	0.318068	0.320155	0.311812	0.264835	0.312544	0.274346	0.277267	0.26642	0.267868	0.287675	0.303329	0.296656	0.317801	0.315427	0.318289	0.264213	0.253783	0.307856	0.279937	0.27793	0.271409	0.152875	0.178343	0.174054	0.175368	0.16657	0.177915	0.187578	0.178972	0.177177	0.188812	0.187889	0.185277
QWMW1222	2-Propenoic acid, 3-phenyl-, pentyl ester	Ester	C14H18O2	3487-99-8	balsamic, amber, cocoa, beany, orchid, labdanum	-	-	-	-	-	-	-	-	-	-	-	-	-	-	-	-	-	-	-	-	-	-	-	-	-	-	-	-	-	-	-	-	-	-	-	-	-
WAMW0162	N-Ethylmorpholine	Heterocyclic compound	C6H13NO	100-74-3	-	0.4	0.109525	0.108427	0.103698	0.115073	0.114942	0.107701	0.0807461	0.0864703	0.0746549	0.0828197	0.0829003	0.0797005	0.0798919	0.0815374	0.0791376	0.0771808	0.0732886	0.0856608	0.094158	0.0889285	0.0997793	0.0827004	0.0785494	0.0828912	0.0843192	0.0873373	0.0831634	0.0829105	0.0789901	0.08834	0.0749529	0.0776994	0.0744436	0.0777818	0.0784901	0.0767056
WAMW0163	Methenamine	Amine	C6H12N4	100-97-0	-	2800	3.03666e-06	3.57394e-06	3.15373e-06	3.46048e-06	3.19093e-06	3.38372e-06	2.59071e-06	3.27584e-06	2.59245e-06	2.69504e-06	2.73911e-06	2.64955e-06	2.79831e-06	3.16078e-06	3.20473e-06	2.35226e-06	3.10247e-06	2.72194e-06	2.70396e-06	2.42813e-06	2.00201e-06	2.41519e-06	2.89437e-06	2.73501e-06	2.06671e-06	2.47451e-06	2.46879e-06	2.16717e-06	2.25707e-06	2.31636e-06	2.51553e-06	2.50309e-06	3.26249e-06	2.6351e-06	2.60956e-06	2.74107e-06
WAMW0222	2-Hexanone, 4-methyl-	Ketone	C7H14O	105-42-0	-	0.00081	67.8897	76.1088	66.4369	69.5102	65.8762	72.1021	62.4317	68.4875	65.2129	69.1402	70.4312	67.0202	63.6461	65.4652	63.8548	59.0702	64.6499	57.8891	62.3507	62.4643	59.1535	69.3498	69.3494	70.7636	61.5541	74.3798	57.594	62.1738	63.3752	76.374	70.6304	57.9027	64.7754	56.4727	58.2799	54.6347
WAMW0273	2(3H)-Furanone, 5-ethenyldihydro-5-methyl-	Ketone	C7H10O2	1073-11-6	fruity, minty	-	-	-	-	-	-	-	-	-	-	-	-	-	-	-	-	-	-	-	-	-	-	-	-	-	-	-	-	-	-	-	-	-	-	-	-	-
WAMW0570	Diethyltoluamide	Amine	C12H17NO	134-62-3	-	-	-	-	-	-	-	-	-	-	-	-	-	-	-	-	-	-	-	-	-	-	-	-	-	-	-	-	-	-	-	-	-	-	-	-	-	-
WAMW0500	Diphenylamine	Amine	C12H11N	122-39-4	sweet, floral, faint	1.3	0.0034559	0.00335049	0.0036809	0.00469082	0.00517388	0.000562516	0.00549048	0.0055327	0.0054988	0.00487609	0.00523962	0.00557905	0.00514493	0.00546146	0.00574087	0.00720898	0.00509662	0.00499656	0.0083836	0.00989067	0.0165324	0.00955657	0.0102717	0.0105802	0.00284112	0.00320853	0.0028488	0.00398342	0.00299232	0.00306398	0.00325383	0.00332148	0.00354921	0.00352809	0.00392755	0.00344416
WAMW0468	1H-Pyrrole-2-carboxaldehyde, 1-methyl-	Aldehyde	C6H7NO	1192-58-1	roasted, nutty	0.037	0.282038	0.285576	0.275715	0.293481	0.325599	0.31585	0.184957	0.218614	0.199491	0.184275	0.163102	0.203654	0.218034	0.201703	0.227486	0.205533	0.189256	0.268455	0.195861	0.189763	0.163874	0.252958	0.257141	0.164597	0.158719	0.187902	0.156285	0.152124	0.136024	0.186826	0.245196	0.15689	0.108314	0.131707	0.166181	0.133105
WAMW0456	Homosalate	Ester	C16H22O3	118-56-9	menthol	-	-	-	-	-	-	-	-	-	-	-	-	-	-	-	-	-	-	-	-	-	-	-	-	-	-	-	-	-	-	-	-	-	-	-	-	-
WAMW0438	Carbamic acid, methyl-, 3-methylphenyl ester	Ester	C9H11NO2	1129-41-5	-	-	-	-	-	-	-	-	-	-	-	-	-	-	-	-	-	-	-	-	-	-	-	-	-	-	-	-	-	-	-	-	-	-	-	-	-	-
WAMW0426	1-Dodecanethiol	Alcohol	C12H26S	112-55-0	skunk, cooked meat	-	-	-	-	-	-	-	-	-	-	-	-	-	-	-	-	-	-	-	-	-	-	-	-	-	-	-	-	-	-	-	-	-	-	-	-	-
WAMW0409	Cyclohexane, nitro-	Nitrogen compounds	C6H11NO2	1122-60-7	-	0.15	0.430227	0.464532	0.422749	0.398197	0.422503	0.40762	0.411283	0.446553	0.352062	0.408363	0.390599	0.413635	0.319864	0.182656	0.243429	0.235535	0.290318	0.308925	0.290113	0.282223	0.329751	0.319329	0.217828	0.270724	0.197652	0.200627	0.194523	0.185362	0.222568	0.181456	0.391222	0.272846	0.285017	0.354435	0.30695	0.340261
WAMW0407	Formic acid, heptyl ester	Ester	C8H16O2	112-23-2	green, waxy, floral, herbal, plum, apple, cucumber	-	-	-	-	-	-	-	-	-	-	-	-	-	-	-	-	-	-	-	-	-	-	-	-	-	-	-	-	-	-	-	-	-	-	-	-	-
WAMW0402	2-Butoxyethyl acetate	Ester	C8H16O3	112-07-2	sweet, fruity	6.5	0.0695086	0.0717145	0.0735443	0.0698764	0.0734118	0.0715037	0.0646532	0.0771647	0.0670859	0.0688469	0.0647954	0.0671084	0.0651183	0.0672103	0.0703356	0.0692047	0.0689034	0.0664471	0.0701714	0.0697713	0.0766783	0.0745772	0.0729473	0.0711125	0.0582984	0.0680888	0.0636317	0.064677	0.0642696	0.0650881	0.0608881	0.0574461	0.0566594	0.061634	0.0596884	0.0594664
WAMW0396	2-Decanol	Alcohol	C10H22O	1120-06-5	anisic, coconut	0.025	0.192475	0.198126	0.190011	0.198491	0.236956	0.225742	0.129292	0.167721	0.16078	0.164129	0.114739	0.1673	0.180623	0.185864	0.182807	0.256341	0.215693	0.227285	0.143237	0.209726	0.246856	0.179817	0.182182	0.220233	0.17535	0.23852	0.200271	0.251771	0.197559	0.213248	0.199175	0.169277	0.173114	0.206599	0.177448	0.181554
WAMW0369	2-Propanol, 1,1'-oxybis-	Alcohol	C6H14O3	110-98-5	mild alcoholic	240	0.000112547	0.00011216	0.000112683	0.000110323	0.000120622	0.000112366	0.00010479	0.000121908	0.000116108	0.000107632	0.000105887	0.000102301	6.68936e-05	7.14476e-05	6.47223e-05	6.53431e-05	7.07823e-05	7.47373e-05	5.50233e-05	5.4532e-05	5.83008e-05	6.13981e-05	5.86153e-05	5.74036e-05	2.50564e-05	3.3649e-05	3.22975e-05	3.09012e-05	2.11999e-05	3.91836e-05	3.24477e-05	3.06785e-05	3.21713e-05	3.27118e-05	3.38066e-05	3.33774e-05
WAMW0352	Undecanal, 2-methyl-	Aldehyde	C12H24O	110-41-8	fresh, amber, aldehydic, moss, citrus, tuberose, metallic, waxy, coumarin	-	-	-	-	-	-	-	-	-	-	-	-	-	-	-	-	-	-	-	-	-	-	-	-	-	-	-	-	-	-	-	-	-	-	-	-	-
WAMW0316	Benzene, chloro-	Halogenated hydrocarbons	C6H5Cl	108-90-7	nutty, burnt	59.3	0.010254	0.0117341	0.00990024	0.0107952	0.0108025	0.0105418	0.00967837	0.0103305	0.00953126	0.00988532	0.011035	0.00972322	0.0097004	0.0106225	0.00970584	0.009619	0.00968026	0.00951421	0.0101731	0.00996329	0.0108066	0.0116585	0.0113407	0.0118949	0.0106061	0.0116019	0.0109502	0.011187	0.0111172	0.0115606	0.0100168	0.0109328	0.0112232	0.0102422	0.0111018	0.0102305
WAMW0304	2,6-Lutidine	Heterocyclic compound	C7H9N	108-48-5	nutty, amine, woody, bread, cocoa, oily	0.003	11.1942	9.18822	8.19435	8.70046	8.26326	9.12728	6.72333	7.45293	5.48528	6.3039	6.86076	6.48768	4.63496	5.70245	4.55853	4.44403	5.25594	5.27375	4.86403	4.41886	4.87806	5.66255	5.1781	5.29345	5.55379	6.43502	5.11207	6.28588	5.40736	6.11518	0.905247	0.922137	0.951043	0.951164	0.982034	0.949054
WAMW0296	2-Pentanol, 4-methyl-	Alcohol	C6H14O	108-11-2	pungent, alcoholic	1.4	0.28986	0.294887	0.291745	0.283594	0.284308	0.292012	0.278386	0.294486	0.276445	0.294358	0.280458	0.283687	0.27851	0.298426	0.283254	0.276961	0.282398	0.277141	0.288924	0.279055	0.298217	0.293769	0.286853	0.305052	0.285016	0.283375	0.281931	0.290707	0.295476	0.273997	0.261904	0.280889	0.283338	0.290899	0.297451	0.283213
WAMW0288	Butanal, 3-hydroxy-	Aldehyde	C4H8O2	107-89-1	-	8	0.0532247	0.0541435	0.0534453	0.0520894	0.0520668	0.053478	0.0510295	0.0540196	0.0503332	0.0538922	0.0513276	0.0519924	0.0509033	0.0544651	0.0512892	0.0507839	0.0514826	0.0507743	0.0530401	0.0515587	0.0545477	0.0536829	0.0517761	0.0554925	0.0521041	0.05155	0.0513254	0.0529143	0.0540964	0.0494549	0.0470722	0.0511907	0.0516673	0.0527508	0.0541198	0.0516665
WAMW0286	Benzene, heptyl-	Aromatics	C13H20	1078-71-3	-	4	0.152522	0.154893	0.144096	0.157589	0.158851	0.149447	0.136599	0.145687	0.130977	0.137866	0.12882	0.139816	0.124448	0.130742	0.133507	0.146114	0.128088	0.137062	0.120385	0.129013	0.165425	0.130147	0.125229	0.133071	0.0737147	0.0812875	0.0757469	0.0818993	0.0781601	0.0780202	0.0789177	0.0784358	0.0784428	0.080836	0.0768849	0.0783729
QWMW1221	2-Butanethiol, 3-methyl-	Alcohol	C5H12S	2084-18-6	repulsive, beefy, meaty	0.0002	77.721	75.6046	82.0391	76.7902	74.0394	74.9262	73.5136	77.5924	71.7741	82.8578	78.8002	73.217	75.4606	77.8464	70.2261	69.0303	68.5374	76.4922	76.8422	74.8663	74.4858	80.816	73.6499	79.3452	71.8077	74.3897	73.8535	70.5367	78.7137	75.4248	67.4522	78.226	76.0336	70.974	82.9004	68.939
QWMW1171	2-methyl-5-[(methylthio)methyl]furan	Heterocyclic compound	C7H10OS	13679-60-2	mustard, onion	-	-	-	-	-	-	-	-	-	-	-	-	-	-	-	-	-	-	-	-	-	-	-	-	-	-	-	-	-	-	-	-	-	-	-	-	-
WAMW0577	1,2-Propanedione, 1-(2-thienyl)-	Ketone	C7H6O2S	13678-69-8	praline, woody	-	-	-	-	-	-	-	-	-	-	-	-	-	-	-	-	-	-	-	-	-	-	-	-	-	-	-	-	-	-	-	-	-	-	-	-	-
QWMW0901	2-Oxepanone, 7-hexyl-	Ketone	C12H22O2	16429-21-3	peach, apricot, milky, fatty	-	-	-	-	-	-	-	-	-	-	-	-	-	-	-	-	-	-	-	-	-	-	-	-	-	-	-	-	-	-	-	-	-	-	-	-	-
QWMW0972	Phenyl 4-pyridyl ketone	Ketone	C12H9NO	14548-46-0	astringent, bitter, musty	-	-	-	-	-	-	-	-	-	-	-	-	-	-	-	-	-	-	-	-	-	-	-	-	-	-	-	-	-	-	-	-	-	-	-	-	-
QWMW0957	1,2,3-Trimethoxybenzene	Ether	C9H12O3	634-36-6	stale, musty, herbal, woody, earhty	-	-	-	-	-	-	-	-	-	-	-	-	-	-	-	-	-	-	-	-	-	-	-	-	-	-	-	-	-	-	-	-	-	-	-	-	-
QWMW0953	Benzaldehyde, 3-hydroxy-4-methoxy-	Aldehyde	C8H8O3	621-59-0	floral, popcorn, pencil, plastic	-	-	-	-	-	-	-	-	-	-	-	-	-	-	-	-	-	-	-	-	-	-	-	-	-	-	-	-	-	-	-	-	-	-	-	-	-
QWMW0952	Butanoic acid, 2-phenoxyethyl ester	Ester	C12H16O3	23511-70-8	fruity, floral, honey, waxy, apple, chamomile	-	-	-	-	-	-	-	-	-	-	-	-	-	-	-	-	-	-	-	-	-	-	-	-	-	-	-	-	-	-	-	-	-	-	-	-	-
QWMW0930	Butanedioic acid	Acid	C4H6O4	110-15-6	acid, umami	15.6	0.00164766	0.00181343	0.00171057	0.00190612	0.00189529	0.00204951	0.00185612	0.00213695	0.00180841	0.00192557	0.00190376	0.00202016	0.000963308	0.00106385	0.000831639	0.000915052	0.00111807	0.0010026	0.00105392	0.00073163	0.00136526	0.00106412	0.00110561	0.0012258	0.00105872	0.00120922	0.00120462	0.00120862	0.00120407	0.00113487	0.00148864	0.00146907	0.00132753	0.00166273	0.0015422	0.00138997
QWMW0887	4-Pentenoic acid ethyl ester	Ester	C7H12O2	1968-40-7	fruity	-	-	-	-	-	-	-	-	-	-	-	-	-	-	-	-	-	-	-	-	-	-	-	-	-	-	-	-	-	-	-	-	-	-	-	-	-
QWMW0878	3-Buten-2-ol, 4-(2,6,6-trimethyl-1-cyclohexen-1-yl)-	Alcohol	C13H22O	22029-76-1	floral, violet, fruity, woody, berry	-	-	-	-	-	-	-	-	-	-	-	-	-	-	-	-	-	-	-	-	-	-	-	-	-	-	-	-	-	-	-	-	-	-	-	-	-
QWMW0847	2H-Pyran-2-one, 6-ethyltetrahydro-	Ketone	C7H12O2	3301-90-4	lactonic, coconut, coumarin	-	-	-	-	-	-	-	-	-	-	-	-	-	-	-	-	-	-	-	-	-	-	-	-	-	-	-	-	-	-	-	-	-	-	-	-	-
QWMW0846	trans-2-Decenoic acid	Acid	C10H18O2	334-49-6	fruity, oily, waxy, sweet, peach	-	-	-	-	-	-	-	-	-	-	-	-	-	-	-	-	-	-	-	-	-	-	-	-	-	-	-	-	-	-	-	-	-	-	-	-	-
QWMW0833	9-Decenal	Aldehyde	C10H18O	39770-05-3	fresh, green, citrus, floral, rose, fatty	0.0022	21.2174	20.9934	20.0645	19.1758	19.9465	19.6737	18.2059	19.1761	17.4942	18.8627	18.0674	17.8067	16.9569	18.462	16.7114	17.5148	17.7601	18.4317	19.7433	17.6023	21.8229	19.1801	20.2322	18.9903	17.4368	19.1141	17.6773	19.1908	18.1773	17.8272	19.1214	18.4625	18.1273	19.7995	17.9793	18.958
QWMW0818	Bis(2-furfuryl)disulfide	Heterocyclic compound	C10H10O2S2	4437-20-1	powerful mercaptan, roasted, coffee, meaty	-	-	-	-	-	-	-	-	-	-	-	-	-	-	-	-	-	-	-	-	-	-	-	-	-	-	-	-	-	-	-	-	-	-	-	-	-
QWMW0810	Propanoic acid, 3-mercapto-, 2-ethylhexyl ester	Ester	C11H22O2S	50448-95-8	sulfury, tropical fruit, savory	-	-	-	-	-	-	-	-	-	-	-	-	-	-	-	-	-	-	-	-	-	-	-	-	-	-	-	-	-	-	-	-	-	-	-	-	-
QWMW0808	Tricyclo[2.2.1.0(2,6)]heptane, 1,7-dimethyl-7-(4-methyl-3-pentenyl)-, (-)-	Terpenoids	C15H24	512-61-8	sweet, woody	-	-	-	-	-	-	-	-	-	-	-	-	-	-	-	-	-	-	-	-	-	-	-	-	-	-	-	-	-	-	-	-	-	-	-	-	-
QWMW0973	Benzenemethanol, .alpha.-ethyl-	Alcohol	C9H12O	93-54-9	sweet, floral, balsamic	-	-	-	-	-	-	-	-	-	-	-	-	-	-	-	-	-	-	-	-	-	-	-	-	-	-	-	-	-	-	-	-	-	-	-	-	-
QWMW0985	Thiazole, 5-ethyl-2-methyl-	Heterocyclic compound	C6H9NS	19961-52-5	chocolate, fishy, pyrazine	-	-	-	-	-	-	-	-	-	-	-	-	-	-	-	-	-	-	-	-	-	-	-	-	-	-	-	-	-	-	-	-	-	-	-	-	-
QWMW0987	Benzofuran, 2-ethenyl-	Heterocyclic compound	C10H8O	7522-79-4	burnt, caramel	-	-	-	-	-	-	-	-	-	-	-	-	-	-	-	-	-	-	-	-	-	-	-	-	-	-	-	-	-	-	-	-	-	-	-	-	-
QWMW1145	Benzenethiol, 2-methoxy-	Alcohol	C7H8OS	7217-59-6	meaty, smoky, sausage, powdery, sweet, spicy, phenol, sulfury	-	-	-	-	-	-	-	-	-	-	-	-	-	-	-	-	-	-	-	-	-	-	-	-	-	-	-	-	-	-	-	-	-	-	-	-	-
QWMW1138	Ethanol, 2-(ethylthio)-	Alcohol	C4H10OS	110-77-0	meaty	0.01	2.28072	2.28413	2.04354	1.82474	2.39574	1.66384	2.08353	2.20431	2.09811	1.98412	1.75576	1.63822	2.29866	2.67276	2.93361	2.78147	2.62498	2.79781	2.91725	2.78379	4.04536	3.31141	3.53518	2.97062	2.89035	3.33842	3.01272	3.24176	3.15729	3.18053	5.09523	4.46242	4.22053	4.04998	4.25809	4.173
QWMW1126	Benzoic acid, 2-hydroxy-, 3-methyl-2-butenyl ester	Ester	C12H14O3	68555-58-8	floral, herbal, green, orchid, woody, metallic	-	-	-	-	-	-	-	-	-	-	-	-	-	-	-	-	-	-	-	-	-	-	-	-	-	-	-	-	-	-	-	-	-	-	-	-	-
QWMW1117	3-Octanol, acetate	Ester	C10H20O2	4864-61-3	fresh, bergamot, woody, green, grapefruit, rose, apple, minty	-	-	-	-	-	-	-	-	-	-	-	-	-	-	-	-	-	-	-	-	-	-	-	-	-	-	-	-	-	-	-	-	-	-	-	-	-
QWMW1114	Neryl butyrate	Ester	C14H24O2	999-40-6	green, waxy, oily, fatty, sweet, leafy, orange	-	-	-	-	-	-	-	-	-	-	-	-	-	-	-	-	-	-	-	-	-	-	-	-	-	-	-	-	-	-	-	-	-	-	-	-	-
QWMW1099	5-Octen-1-ol, (Z)-	Alcohol	C8H16O	64275-73-6	green, melon, watery, watermelon, earthy, mushroom, violet, leafy, fishy, soapy	0.002	21.8012	22.3654	20.6861	21.6682	20.6092	20.6309	21.4953	22.6606	19.2358	21.0692	19.6777	20.4335	12.9632	13.0202	13.1765	14.2336	13.5943	15.7339	13.6967	14.3087	15.2446	16.3763	14.4095	15.5257	10.5703	10.7918	11.4236	11.2854	11.3579	10.1651	15.3719	15.2313	14.5206	15.6673	16.9078	16.1523
QWMW1094	Hexane, 1,1'-[ethylidenebis(oxy)]bis-	Ether	C14H30O2	5405-58-3	sweet, green, ethereal, waxy, herbal	-	-	-	-	-	-	-	-	-	-	-	-	-	-	-	-	-	-	-	-	-	-	-	-	-	-	-	-	-	-	-	-	-	-	-	-	-
QWMW1080	α-methyl ionone	Terpenoids	C14H22O	7779-30-8	sweet, powdery, fruity, floral, violet, beeswax, orris, woody	0.0024	17.866	19.219	17.3754	19.5645	18.7244	18.6638	46.0562	47.4826	42.8591	44.223	42.7102	46.8052	89.4754	93.8388	96.6168	106.951	93.4061	97.5327	143.075	162.776	224.556	154.468	153.062	163.948	349.558	369.151	344.747	383.662	361.131	360.932	380.734	370.174	383.568	375.826	356.49	363.262
QWMW1068	Benzeneethanol, .alpha.,.alpha.-dimethyl-, propanoate	Ester	C13H18O2	67785-77-7	sweet, jasmin, hairy, tea, natural	-	-	-	-	-	-	-	-	-	-	-	-	-	-	-	-	-	-	-	-	-	-	-	-	-	-	-	-	-	-	-	-	-	-	-	-	-
QWMW1066	2-Propenoic acid, 3-phenyl-, cyclohexyl ester	Ester	C15H18O2	7779-17-1	fruity, peach, cherry, maraschino, cherry, bitter, almond, cinnamyl	-	-	-	-	-	-	-	-	-	-	-	-	-	-	-	-	-	-	-	-	-	-	-	-	-	-	-	-	-	-	-	-	-	-	-	-	-
QWMW1064	Benzene, [2-(1-propoxyethoxy)ethyl]-	Ether	C13H20O2	7493-57-4	green, reseda, leafy, hyacinth, herbal	-	-	-	-	-	-	-	-	-	-	-	-	-	-	-	-	-	-	-	-	-	-	-	-	-	-	-	-	-	-	-	-	-	-	-	-	-
QWMW1053	Benzoic acid, 2-phenylethyl ester	Ester	C15H14O2	94-47-3	soft, rose, balsamic, honey, floral	-	-	-	-	-	-	-	-	-	-	-	-	-	-	-	-	-	-	-	-	-	-	-	-	-	-	-	-	-	-	-	-	-	-	-	-	-
QWMW1046	Isoamyl laurate	Ester	C17H34O2	6309-51-9	wine, waxy, oily, fatty, peach	100	0.00877546	0.0095213	0.00913838	0.0108615	0.00911017	0.00940908	0.00806001	0.0118214	0.00759748	0.00837223	0.00799836	0.00804454	0.00936965	0.00874236	0.0117271	0.0138507	0.00965197	0.00967632	0.00889551	0.0100992	0.0156246	0.010073	0.0106951	0.0130745	0.0131433	0.0129201	0.0130412	0.0143332	0.0137039	0.0135925	0.0144814	0.0154107	0.0147065	0.0146065	0.0168414	0.0151891
QWMW1037	1-Heptanol, 2-(phenylmethylene)-, acetate	Ester	C16H22O2	7493-78-9	floral, jasmin, chocolate, leathery, fruity, balsamic, spicy, cinnamyl	-	-	-	-	-	-	-	-	-	-	-	-	-	-	-	-	-	-	-	-	-	-	-	-	-	-	-	-	-	-	-	-	-	-	-	-	-
QWMW1034	1-Nonen-3-ol	Alcohol	C9H18O	21964-44-3	oily, creamy, green, earthy, mushroom	0.001	11.3183	11.9698	11.0356	11.5491	11.0921	10.6148	11.0919	11.9912	11.6134	11.148	11.7385	10.7722	5.14729	5.61539	5.19194	5.15933	4.67659	5.49573	6.84861	6.89974	8.7393	8.66072	8.70371	6.76635	5.20312	6.33243	5.79587	5.99328	6.1107	6.61435	9.05406	7.98706	7.61351	8.77769	8.47558	8.83383
QWMW1031	Thiophene, 2,2'-dithiobis-	Heterocyclic compound	C8H6S4	6911-51-9	rubbery, earthy, mushroom	-	-	-	-	-	-	-	-	-	-	-	-	-	-	-	-	-	-	-	-	-	-	-	-	-	-	-	-	-	-	-	-	-	-	-	-	-
QWMW1028	Massoilactone	Ester	C10H16O2	51154-96-2	sweet, coconut, meaty, lactonic, creamy, milky, waxy	0.59	0.0156311	0.0176648	0.0171858	0.0214435	0.0208195	0.0182873	0.0201945	0.0233288	0.0196755	0.0178977	0.0171265	0.0212743	0.0264232	0.0266873	0.0313523	0.0315345	0.0294228	0.0290137	0.0372738	0.0445576	0.0488469	0.0364299	0.0383246	0.0418899	0.0816205	0.0849101	0.0801233	0.0878899	0.0814921	0.0819981	0.0982487	0.0973905	0.101403	0.0999677	0.0937808	0.0966624
QWMW1020	2H-Pyran-2-one, tetrahydro-6-octyl-	Ketone	C13H24O2	7370-92-5	creamy, milky, oily, dairy, buttery, musty	-	-	-	-	-	-	-	-	-	-	-	-	-	-	-	-	-	-	-	-	-	-	-	-	-	-	-	-	-	-	-	-	-	-	-	-	-
QWMW0998	2-Cyclopenten-1-one, 2-hydroxy-3-methyl-	Ketone	C6H8O2	80-71-7	caramel, maple, syrup	0.3	0.0339748	0.0361394	0.0387638	0.0353514	0.0425719	0.033821	0.0396489	0.0449298	0.0358682	0.0388368	0.0409713	0.0370006	0.0213811	0.0280153	0.0248747	0.0286075	0.0234584	0.0272592	0.0269673	0.0339688	0.0336526	0.0325382	0.0246709	0.0299208	0.0234185	0.0233162	0.0147229	0.0206253	0.0224966	0.0181824	0.0234363	0.0292354	0.0286386	0.0296391	0.0300443	0.0285533
WAMW0576	Furan, 2-methyl-5-(methylthio)-	Heterocyclic compound	C6H8OS	13678-59-6	sulfury, onion, garlic, coffee, mustard, horseradish	-	-	-	-	-	-	-	-	-	-	-	-	-	-	-	-	-	-	-	-	-	-	-	-	-	-	-	-	-	-	-	-	-	-	-	-	-
WAMW0591	Pyrazine, 2-ethenyl-6-methyl-	Heterocyclic compound	C7H8N2	13925-09-2	hazelnut	-	-	-	-	-	-	-	-	-	-	-	-	-	-	-	-	-	-	-	-	-	-	-	-	-	-	-	-	-	-	-	-	-	-	-	-	-
WMW0104	Cyclooctanemethanol	Alcohol	C9H18O	3637-63-6	-	-	-	-	-	-	-	-	-	-	-	-	-	-	-	-	-	-	-	-	-	-	-	-	-	-	-	-	-	-	-	-	-	-	-	-	-	-
WMW0144	1-Heptadecene	Hydrocarbons	C17H34	6765-39-5	-	8	0.000562019	0.000779408	0.000716862	0.00103923	0.00073445	0.000765426	0.000604756	0.000874898	0.000609979	0.000624242	0.000607789	0.000763134	0.000884912	0.000816617	0.00130138	0.00103581	0.001091	0.00079696	0.000825852	0.00136776	0.00135427	0.00113998	0.00129988	0.00122743	0.000873071	0.00087558	0.00101935	0.00141696	0.000899707	0.00089378	0.00137435	0.00102177	0.0011813	0.000594196	0.000754226	0.0013976
WMW0143	1-Octadecene	Hydrocarbons	C18H36	112-88-9	-	-	-	-	-	-	-	-	-	-	-	-	-	-	-	-	-	-	-	-	-	-	-	-	-	-	-	-	-	-	-	-	-	-	-	-	-	-
WMW0130	1-Pentadecene	Hydrocarbons	C15H30	13360-61-7	-	3.6	0.0480665	0.0544613	0.0478758	0.0552484	0.0542872	0.0541108	0.0462261	0.0497164	0.0454483	0.0457419	0.0465292	0.0470497	0.053226	0.0555142	0.0560912	0.0587623	0.0565609	0.0546697	0.0710371	0.0772514	0.107679	0.0729393	0.0746653	0.0768309	0.0608614	0.0682875	0.0633056	0.0673504	0.0667828	0.0680003	0.0678082	0.0679818	0.0706273	0.072269	0.072056	0.0705206
WMW0127	3-Octen-1-ol, (Z)-	Alcohol	C8H16O	20125-84-2	fresh, fatty, grassy, melon, green, cortex, herbal, earthy, fusel, spicy	-	-	-	-	-	-	-	-	-	-	-	-	-	-	-	-	-	-	-	-	-	-	-	-	-	-	-	-	-	-	-	-	-	-	-	-	-
WMW0126	1,3-Hexadiene, 3-ethyl-2-methyl-	Hydrocarbons	C9H16	61142-36-7	nutty	-	-	-	-	-	-	-	-	-	-	-	-	-	-	-	-	-	-	-	-	-	-	-	-	-	-	-	-	-	-	-	-	-	-	-	-	-
WMW0122	1-Undecyn-4-ol	Alcohol	C11H20O	22127-86-2	-	-	-	-	-	-	-	-	-	-	-	-	-	-	-	-	-	-	-	-	-	-	-	-	-	-	-	-	-	-	-	-	-	-	-	-	-	-
WMW0120	Nonane, 1-iodo-	Halogenated hydrocarbons	C9H19I	4282-42-2	-	-	-	-	-	-	-	-	-	-	-	-	-	-	-	-	-	-	-	-	-	-	-	-	-	-	-	-	-	-	-	-	-	-	-	-	-	-
WMW0115	5-Ethylhydantoin	Nitrogen compounds	C5H8N2O2	15414-82-1	-	-	-	-	-	-	-	-	-	-	-	-	-	-	-	-	-	-	-	-	-	-	-	-	-	-	-	-	-	-	-	-	-	-	-	-	-	-
WMW0105	1,7-Nonadiene, 4,8-dimethyl-	Hydrocarbons	C11H20	62108-28-5	-	-	-	-	-	-	-	-	-	-	-	-	-	-	-	-	-	-	-	-	-	-	-	-	-	-	-	-	-	-	-	-	-	-	-	-	-	-
WMW0099	Cyclopentene, 1-butyl-	Hydrocarbons	C9H16	2423-01-0	-	-	-	-	-	-	-	-	-	-	-	-	-	-	-	-	-	-	-	-	-	-	-	-	-	-	-	-	-	-	-	-	-	-	-	-	-	-
WMW0006	(3aR,4R,7R)-1,4,9,9-Tetramethyl-3,4,5,6,7,8-hexahydro-2H-3a,7-methanoazulen-2-one	Terpenoids	C15H22O	3466-15-7	-	-	-	-	-	-	-	-	-	-	-	-	-	-	-	-	-	-	-	-	-	-	-	-	-	-	-	-	-	-	-	-	-	-	-	-	-	-
WMW0083	2-Decen-1-ol, (E)-	Alcohol	C10H20O	18409-18-2	waxy, fresh air, citrus, rose, rue	-	-	-	-	-	-	-	-	-	-	-	-	-	-	-	-	-	-	-	-	-	-	-	-	-	-	-	-	-	-	-	-	-	-	-	-	-
WMW0082	1,10-Undecadiene	Hydrocarbons	C11H20	13688-67-0	-	-	-	-	-	-	-	-	-	-	-	-	-	-	-	-	-	-	-	-	-	-	-	-	-	-	-	-	-	-	-	-	-	-	-	-	-	-
WMW0077	1-Tridecyne	Hydrocarbons	C13H24	26186-02-7	-	-	-	-	-	-	-	-	-	-	-	-	-	-	-	-	-	-	-	-	-	-	-	-	-	-	-	-	-	-	-	-	-	-	-	-	-	-
WMW0059	E-2-Hexenyl benzoate	Ester	C13H16O2	76841-70-8	-	-	-	-	-	-	-	-	-	-	-	-	-	-	-	-	-	-	-	-	-	-	-	-	-	-	-	-	-	-	-	-	-	-	-	-	-	-
WMW0058	5-Hepten-2-ol, 6-methyl-	Alcohol	C8H16O	1569-60-4	sweet, oily, green, coriander	20.008	0.000265853	0.000338508	0.000302752	0.000338663	0.000365754	0.000320362	0.000164725	0.000145395	0.000190079	0.000151692	0.00015985	0.000101047	0.000234718	0.000240954	0.000208926	0.000282643	0.000255079	0.000258946	0.000137153	9.0356e-05	0.000166061	0.000140244	0.00017884	0.000150991	5.3416e-05	0.000109177	0.000102798	0.000125979	0.000110647	9.95333e-05	8.80154e-05	8.2342e-05	1.1407e-05	9.86585e-05	8.97381e-05	7.80837e-05
WMW0052	(E)-1-Methyl-4-(6-methylhept-5-en-2-ylidene)cyclohex-1-ene	Terpenoids	C15H24	53585-13-0	-	-	-	-	-	-	-	-	-	-	-	-	-	-	-	-	-	-	-	-	-	-	-	-	-	-	-	-	-	-	-	-	-	-	-	-	-	-
WMW0030	Phenanthrene, 7-ethenyl-1,2,3,4,4a,4b,5,6,7,8,10,10a-dodecahydro-4a,7-dimethyl-1-methylene-, [4aS-(4a.alpha.,4a.beta.,7.beta.,10a.beta.)]-	Hydrocarbons	C19H28	26549-04-2	-	-	-	-	-	-	-	-	-	-	-	-	-	-	-	-	-	-	-	-	-	-	-	-	-	-	-	-	-	-	-	-	-	-	-	-	-	-
WMW0022	Salvial-4(14)-en-1-one	Terpenoids	C15H24O	73809-82-2	-	-	-	-	-	-	-	-	-	-	-	-	-	-	-	-	-	-	-	-	-	-	-	-	-	-	-	-	-	-	-	-	-	-	-	-	-	-
WMW0148	Spiro[4.5]dec-7-ene, 1,8-dimethyl-4-(1-methylethenyl)-, [1S-(1.alpha.,4.beta.,5.alpha.)]-	Terpenoids	C15H24	24048-44-0	-	-	-	-	-	-	-	-	-	-	-	-	-	-	-	-	-	-	-	-	-	-	-	-	-	-	-	-	-	-	-	-	-	-	-	-	-	-
WMW0158	Methylparaben	Ester	C8H8O3	99-76-3	-	1220	2.03698e-05	2.25411e-05	1.53395e-05	2.24283e-05	2.10448e-05	2.18379e-05	4.81849e-05	4.94695e-05	4.49835e-05	4.80105e-05	4.57834e-05	5.01895e-05	0.000111725	0.000118261	0.000117313	0.000132163	0.000114749	0.000121861	0.000202958	0.000231694	0.00030829	0.000222082	0.0002167	0.0002327	0.000382643	0.000398237	0.00036608	0.000410968	0.000379072	0.000385893	0.000412125	0.000405244	0.000416441	0.000408601	0.000376648	0.000389889
WMW0173	vitispirane	Heterocyclic compound	C13H20O	65416-59-3	floral, fruity, earthy, woody	0.8	0.0152587	0.0164069	0.0158282	0.0179551	0.0190905	0.0184306	0.015045	0.0155778	0.0141291	0.0147093	0.0147017	0.0161228	0.0119129	0.0112585	0.0114652	0.0125145	0.0126592	0.0122388	0.0152572	0.0152532	0.0198608	0.0160842	0.0153585	0.0157468	0.0138341	0.0154882	0.0144336	0.0146793	0.0150299	0.0150689	0.0151789	0.0145505	0.0156171	0.0161829	0.015164	0.0149917
XMW0019	Acetophenone, 4'-hydroxy-	Ketone	C8H8O2	99-93-4	mild, sweet, hawthorn, balsamic, mimosa	5.5	7.44231e-05	7.78436e-05	0.00041376	7.74507e-05	0.000392708	0.000496344	0.00119958	0.00102627	0.00107643	0.00118163	0.00119701	0.00127586	0.00301243	0.00311878	0.00313198	0.00329949	0.0031584	0.00315906	0.00560509	0.00614492	0.00831852	0.00618781	0.00616267	0.00666312	0.0109806	0.0115089	0.0103574	0.0119209	0.0107762	0.0113626	0.0118833	0.0114935	0.0120639	0.0117747	0.011111	0.0115105
XMW0017	Hexadecanoic acid, methyl ester	Ester	C17H34O2	112-39-0	oily, waxy, fatty, orris	4000	1.82443e-06	2.09227e-06	1.91753e-06	2.13046e-06	1.9948e-06	1.94956e-06	1.53392e-06	1.60643e-06	1.4117e-06	1.58435e-06	1.62554e-06	1.35637e-06	1.7948e-06	1.89014e-06	2.21185e-06	2.47553e-06	2.31021e-06	2.27784e-06	1.31343e-06	1.21732e-06	1.842e-06	1.50141e-06	1.77338e-06	1.88718e-06	7.17602e-07	5.34582e-07	5.58641e-07	6.71039e-07	7.05556e-07	5.59074e-07	7.30414e-07	8.02169e-07	6.763e-07	8.95036e-07	8.0155e-07	1.02848e-06
XMW0010	1,3,6,10-Cyclotetradecatetraene, 3,7,11-trimethyl-14-(1-methylethyl)-, [S-(E,Z,E,E)]-	Terpenoids	C20H32	1898-13-1	-	-	-	-	-	-	-	-	-	-	-	-	-	-	-	-	-	-	-	-	-	-	-	-	-	-	-	-	-	-	-	-	-	-	-	-	-	-
XMW0008	Isophorone	Ketone	C9H14O	78-59-1	cool, woody, sweet, green, camphor, fruity, musty, cedarwood, tobacco, leathery	0.011	62.0303	63.3622	59.7663	59.3605	59.6175	59.2396	47.5317	52.7652	46.9043	48.4181	46.5016	46.1322	32.2593	34.3383	32.8909	32.2369	33.9325	35.3433	26.7978	25.8755	27.3304	28.9337	26.3278	26.6119	11.225	12.4713	11.2738	10.9882	12.1104	11.6067	10.9949	10.8706	10.5301	11.8321	11.9441	12.3939
XMW0007	Dibutyl phthalate	Ester	C16H22O4	84-74-2	faint	0.26	0.0612571	0.0557136	0.0531665	0.0511341	0.0462757	0.0488923	0.0621851	0.0520693	0.0501344	0.052994	0.0551337	0.044839	0.0463138	0.0549412	0.048188	0.0418533	0.0431025	0.0453273	0.0537466	0.0194023	0.0552195	0.0518194	0.0447772	0.0361149	0.0547093	0.0531687	0.0573972	0.0668966	0.0619879	0.0556728	0.0496105	0.0583254	0.0460764	0.0501847	0.0513558	0.0467312
WMW0232	(4aS,8aR)-3,8a-Dimethyl-5-methylene-4,4a,5,6,7,8,8a,9-octahydronaphtho[2,3-b]furan	Terpenoids	C15H20O	6989-21-5	-	-	-	-	-	-	-	-	-	-	-	-	-	-	-	-	-	-	-	-	-	-	-	-	-	-	-	-	-	-	-	-	-	-	-	-	-	-
WMW0230	Hinesol	Terpenoids	C15H26O	23811-08-7	spicy, peppery, woody	-	-	-	-	-	-	-	-	-	-	-	-	-	-	-	-	-	-	-	-	-	-	-	-	-	-	-	-	-	-	-	-	-	-	-	-	-
WMW0220	2H-2,4a-Methanonaphthalene, 1,3,4,5,6,7-hexahydro-1,1,5,5-tetramethyl-, (2S)-	Terpenoids	C15H24	1135-66-6	woody, dusty, amber, incense	-	-	-	-	-	-	-	-	-	-	-	-	-	-	-	-	-	-	-	-	-	-	-	-	-	-	-	-	-	-	-	-	-	-	-	-	-
WMW0218	Butylated Hydroxytoluene	Phenol	C15H24O	128-37-0	mild, phenol, camphor	1	0.00852682	0.0090499	0.00781023	0.00846594	0.0084959	0.0083149	0.0198479	0.0204301	0.018363	0.0189202	0.0182881	0.0201488	0.0364346	0.0382017	0.0392012	0.0430044	0.0372116	0.0392646	0.0612082	0.0692789	0.0992622	0.066617	0.0655634	0.0698114	0.160505	0.17078	0.157854	0.175005	0.164805	0.162865	0.196181	0.191374	0.194963	0.194159	0.183608	0.188482
WMW0217	2-Octenal, 2-butyl-	Aldehyde	C12H22O	13019-16-4	aldehydic, green, watery, fruity, metallic, oily, tropical, fatty, sweaty, goaty	-	-	-	-	-	-	-	-	-	-	-	-	-	-	-	-	-	-	-	-	-	-	-	-	-	-	-	-	-	-	-	-	-	-	-	-	-
WMW0214	Nonane, 4,5-dimethyl-	Hydrocarbons	C11H24	17302-23-7	-	-	-	-	-	-	-	-	-	-	-	-	-	-	-	-	-	-	-	-	-	-	-	-	-	-	-	-	-	-	-	-	-	-	-	-	-	-
WMW0212	Benzoic acid, 4-ethoxy-, ethyl ester	Ester	C11H14O3	23676-09-7	-	-	-	-	-	-	-	-	-	-	-	-	-	-	-	-	-	-	-	-	-	-	-	-	-	-	-	-	-	-	-	-	-	-	-	-	-	-
WMW0211	2,4-Hexadienoic acid, ethyl ester, (2E,4E)-	Ester	C8H12O2	2396-84-1	warm, fruity, anisic, licorice, ether	0.56	0.0574474	0.0569326	0.054811	0.0546851	0.0560838	0.0542183	0.0543972	0.0597532	0.0525304	0.0567685	0.0513877	0.0535468	0.0436699	0.0461772	0.0434479	0.0459168	0.0465433	0.0456204	0.0446127	0.042669	0.0530562	0.0475909	0.0462765	0.0461996	0.0303954	0.0329377	0.0303169	0.0329571	0.0315674	0.0313859	0.0340476	0.0327568	0.032548	0.0347904	0.0348943	0.0327399
WMW0209	9H-Fluorene, 9-methyl-	Aromatics	C14H12	2523-37-7	-	-	-	-	-	-	-	-	-	-	-	-	-	-	-	-	-	-	-	-	-	-	-	-	-	-	-	-	-	-	-	-	-	-	-	-	-	-
WMW0208	2H-Pyran-2-one, tetrahydro-6-(2-pentenyl)-, (Z)-	Heterocyclic compound	C10H16O2	25524-95-2	creamy, waxy, jasmin, peach, coconut	2	0.0281947	0.0318854	0.0282503	0.0350426	0.0341993	0.033275	0.028839	0.032081	0.0281185	0.0280779	0.0291775	0.0311236	0.03094	0.0314547	0.0335003	0.0356895	0.0314142	0.0312534	0.0372489	0.0454716	0.0560534	0.0381574	0.0405237	0.0388879	0.037124	0.0425817	0.0391267	0.0430648	0.0399248	0.0403618	0.0395632	0.0402785	0.0403428	0.0394185	0.0416049	0.041321
WMW0200	Methane, di-p-tolyl-	Aromatics	C15H16	4957-14-6	-	-	-	-	-	-	-	-	-	-	-	-	-	-	-	-	-	-	-	-	-	-	-	-	-	-	-	-	-	-	-	-	-	-	-	-	-	-
WMW0180	Ethyl trans-4-decenoate	Ester	C12H22O2	76649-16-6	green, fruity, waxy, cognac	-	-	-	-	-	-	-	-	-	-	-	-	-	-	-	-	-	-	-	-	-	-	-	-	-	-	-	-	-	-	-	-	-	-	-	-	-
WMW0177	3-Cyclohexene-1-methanol, .alpha.,.alpha.,4-trimethyl-, propanoate	Terpenoids	C13H22O2	80-27-3	herbal, green, old wood, citrus, geranium, tropical	-	-	-	-	-	-	-	-	-	-	-	-	-	-	-	-	-	-	-	-	-	-	-	-	-	-	-	-	-	-	-	-	-	-	-	-	-
WMW0176	2H-Pyran-2-one, tetrahydro-6-methyl-	Ketone	C6H10O2	823-22-3	creamy, fruity, coconut	0.02683	2.49181	2.51758	2.49385	2.26088	2.39768	2.14569	2.47985	2.71568	2.86462	2.51248	2.40454	2.4623	2.30495	2.77013	2.3555	2.3399	2.59233	2.34116	2.28844	2.50663	2.66164	2.39655	2.8251	2.34917	2.38189	2.82275	2.34826	2.54992	2.50379	2.78946	2.52957	2.04229	2.00101	2.0055	2.075	2.05406
WMW0175	.delta.-Terpineol, acetate	Terpenoids	C12H20O2	93836-50-1	-	-	-	-	-	-	-	-	-	-	-	-	-	-	-	-	-	-	-	-	-	-	-	-	-	-	-	-	-	-	-	-	-	-	-	-	-	-
WMW0007	Azulene, 1,2,3,5,6,7,8,8a-octahydro-1,4-dimethyl-7-(1-methylethenyl)-, [1S-(1.alpha.,7.alpha.,8a.beta.)]-	Terpenoids	C15H24	3691-11-0	-	-	-	-	-	-	-	-	-	-	-	-	-	-	-	-	-	-	-	-	-	-	-	-	-	-	-	-	-	-	-	-	-	-	-	-	-	-
WAMW0624	9-Decenoic acid	Acid	C10H18O2	14436-32-9	waxy, green, fruity, fatty, soapy	4.3	0.113984	0.117978	0.109595	0.119909	0.119205	0.115633	0.104462	0.111395	0.100593	0.105247	0.0994194	0.106279	0.0945826	0.099714	0.101069	0.10956	0.0997796	0.104178	0.0974586	0.103681	0.130247	0.10364	0.100812	0.106255	0.0620061	0.0657065	0.0619151	0.0659206	0.0637628	0.0652026	0.065578	0.0662101	0.066997	0.0695863	0.0658838	0.0668773
WAMW0917	Disulfide, methyl propyl	Sulfur compounds	C4H10S2	2179-60-4	sulfury, onion, radish, mustard, tomato	0.125	0.0281491	0.0358211	0.0253714	0.0290588	0.0283414	0.031645	0.0284625	0.0362201	0.0306519	0.0332919	0.0312142	0.0317497	0.0252514	0.0259949	0.021038	0.0298161	0.0254332	0.0259426	0.0292137	0.0289635	0.0320324	0.0347619	0.0339605	0.0310157	0.0313769	0.0325165	0.0333659	0.0331457	0.0348635	0.0370902	0.0417432	0.0442302	0.0461747	0.0509084	0.0509505	0.050409
WAMW1368	1-Hepten-3-ol	Alcohol	C7H14O	4938-52-7	oily, green, metallic, acrylate, tomato, spicy	0.01	17.8086	17.8113	18.2787	18.1662	17.926	17.6528	14.005	16.9819	15.0472	15.5021	14.6899	15.7847	13.8305	13.7506	12.3227	14.7096	13.5326	13.2886	13.4047	14.1537	13.7769	13.7109	13.2158	13.5732	12.1218	13.0971	13.7997	15.0221	14.7325	13.2937	16.8603	16.7906	16.3549	19.9493	19.7431	17.5835
WAMW1345	1-Cyclohexene-1-acetaldehyde, 2,6,6-trimethyl-	Aldehyde	C11H18O	472-66-2	camphor, cool, woody, medicinal, oily, berry, orris, soapy	-	-	-	-	-	-	-	-	-	-	-	-	-	-	-	-	-	-	-	-	-	-	-	-	-	-	-	-	-	-	-	-	-	-	-	-	-
WAMW1333	1,5-Pentanediamine	Amine	C5H14N2	462-94-2	-	190	4.36473e-05	4.49795e-05	3.66966e-05	4.03284e-05	4.63903e-05	4.39075e-05	3.57072e-05	3.71764e-05	4.03126e-05	3.51967e-05	4.04582e-05	4.16106e-05	3.6452e-05	4.11253e-05	2.7452e-05	2.64906e-05	4.51787e-05	3.7919e-05	4.09264e-05	2.80431e-05	3.64425e-05	3.67076e-05	4.39973e-05	4.49494e-05	3.67739e-05	4.63633e-05	3.88883e-05	3.47766e-05	3.65571e-05	4.31804e-05	4.02742e-05	3.97511e-05	4.23347e-05	3.81262e-05	4.58414e-05	3.73726e-05
WAMW1307	2-n-Butyl furan	Heterocyclic compound	C8H12O	4466-24-4	mild, fruity, wine, sweet, spicy	0.005	1.40782	2.12589	1.69727	1.74009	1.5774	1.67722	1.17411	1.39258	1.1892	1.2663	1.19088	1.83512	1.27456	1.38809	0.786749	1.27552	1.24533	1.19983	1.20691	1.2035	1.28161	1.28322	1.11571	0.999	1.01128	1.01615	1.28984	1.03122	1.28789	0.976647	1.39063	1.51625	1.61002	1.86574	1.55018	1.57023
WAMW1285	2,4-Heptadienal, (E,E)-	Aldehyde	C7H10O	4313-03-5	fatty, green, oily, aldehydic, vegetable, cake, cinnamon	0.056	1.44128	1.4586	1.38558	1.44415	1.53532	1.58365	0.833705	1.01726	0.876232	0.884054	0.710969	0.843505	1.62056	1.6305	1.57551	1.66428	1.81703	1.87182	0.737402	0.612442	0.812938	0.851456	0.883085	0.713764	0.428057	0.573247	0.562295	0.602431	0.602904	0.626374	0.615663	0.529418	0.5197	0.528466	0.561447	0.553407
WAMW1268	Isopropyl-4-hydroxybenzoate	Ester	C10H12O3	4191-73-5	-	-	-	-	-	-	-	-	-	-	-	-	-	-	-	-	-	-	-	-	-	-	-	-	-	-	-	-	-	-	-	-	-	-	-	-	-	-
WAMW1265	Pyrazine, ethenyl-	Heterocyclic compound	C6H6N2	4177-16-6	green, burnt, nutty	0.7	1.37366	1.3847	1.33963	1.3812	1.38915	1.34227	1.01218	1.17886	0.982786	1.03524	0.973255	1.00521	1.3264	1.3568	1.41405	1.42368	1.47229	1.51759	1.04924	1.05277	1.06705	1.13692	1.10296	1.07454	1.11451	1.20789	1.23602	1.23616	1.21813	1.21401	1.14955	1.11638	1.07459	1.20033	1.21304	1.21808
WAMW1042	2-Cyclopenten-1-one, 3-methyl-	Ketone	C6H8O	2758-18-1	sweet, fruity, fatty	-	-	-	-	-	-	-	-	-	-	-	-	-	-	-	-	-	-	-	-	-	-	-	-	-	-	-	-	-	-	-	-	-	-	-	-	-
WAMW1012	2-Hexanone, 3-methyl-	Ketone	C7H14O	2550-21-2	-	0.041	0.233212	0.289372	0.248409	0.239722	0.277433	0.256886	0.244412	0.254376	0.223989	0.248054	0.283428	0.234969	0.258664	0.286298	0.248434	0.2364	0.234849	0.263679	0.257993	0.248159	0.249588	0.243594	0.272412	0.254837	0.236778	0.258186	0.180794	0.23555	0.251876	0.326345	0.23191	0.23201	0.249588	0.224	0.240816	0.228549
WAMW0949	γ-Dodecalactone	Ester	C12H22O2	2305-05-7	fatty, peachy, musky	0.00043	0.810555	0.169562	2.93188	1.2736	1.47284	0.166927	1.25781	1.54761	2.64057	1.37754	1.90923	2.87368	2.71992	2.78564	4.68754	4.52929	2.68621	2.89282	4.26981	3.97865	6.50412	4.6554	3.5013	5.30917	25.1602	26.597	25.983	32.7146	27.7829	29.4677	31.1282	29.9735	30.9401	30.356	30.5637	29.5746
WAMW0913	2,4-Dodecadienal, (E,E)-	Aldehyde	C12H20O	21662-16-8	grapefruit, orange, fatty, citrus	-	-	-	-	-	-	-	-	-	-	-	-	-	-	-	-	-	-	-	-	-	-	-	-	-	-	-	-	-	-	-	-	-	-	-	-	-
WAMW2187	Menthyl acetate	Terpenoids	C12H22O2	89-48-5	tea, minty, fruity	-	-	-	-	-	-	-	-	-	-	-	-	-	-	-	-	-	-	-	-	-	-	-	-	-	-	-	-	-	-	-	-	-	-	-	-	-
WAMW0870	Cyclohexanol, 2-(1,1-dimethylethyl)-, acetate, cis-	Ester	C12H22O2	20298-69-5	fruity, bergamot, lime, woody, camphor, fir, needle, spicy, marjoram	-	-	-	-	-	-	-	-	-	-	-	-	-	-	-	-	-	-	-	-	-	-	-	-	-	-	-	-	-	-	-	-	-	-	-	-	-
BPMW006	Butanedioic acid, 2-methyl-3-oxo-, diethyl ester	Ester	C9H14O5	759-65-9	-	-	-	-	-	-	-	-	-	-	-	-	-	-	-	-	-	-	-	-	-	-	-	-	-	-	-	-	-	-	-	-	-	-	-	-	-	-
WAMW0698	6-Methyl-3,5-heptadiene-2-one	Ketone	C8H12O	1604-28-0	-	0.1	4.51879	4.64795	4.4501	4.52629	4.55841	4.50303	4.25686	4.87108	4.14845	4.28028	4.09384	4.13424	2.87288	2.93897	2.94649	2.96464	3.08124	3.20149	3.12152	3.07499	3.42716	3.41237	3.22381	3.20304	3.06495	3.3819	3.39792	3.35248	3.37543	3.29419	5.01232	4.94629	4.74378	5.34187	5.30333	5.41613
WAMW0663	3-Dodecanone	Ketone	C12H24O	1534-27-6	-	0.0083	14.6879	15.9306	2.40962	15.4486	15.4564	15.2977	13.7685	14.7403	13.4678	13.6299	13.8679	13.9225	2.35273	2.48531	2.84544	3.08366	2.4407	2.67183	2.61442	2.08585	19.4992	2.84125	14.6835	2.93507	2.544	2.66072	2.51204	2.73546	2.65852	2.60725	2.70913	2.68234	2.6739	2.78767	2.67372	2.59331
WAMW0654	Benzene, 1,3-dimethoxy-	Ether	C8H10O2	151-10-0	acid, fruity, nutmeg, neroli	0.0214	3.59924	4.65425	4.29133	4.33128	4.50247	4.34078	3.65582	5.08748	3.62603	3.50547	3.76518	3.77821	3.28799	3.7381	3.70234	3.37791	3.58582	3.56661	3.7268	3.83737	6.52327	4.48744	4.43923	4.48957	3.5622	3.67797	3.46997	3.37411	3.41708	3.83932	3.46485	3.07221	3.84642	4.57017	4.15965	3.46734
WAMW0653	Phytol	Terpenoids	C20H40O	150-86-7	delicate, floral, balsamic, powdery, waxy	0.64	0.0297137	0.0314193	0.0260142	0.0279578	0.0311301	0.0286418	0.0293088	0.0303842	0.0267992	0.0259136	0.0217982	0.0244703	0.0282894	0.0283134	0.0329252	0.0267524	0.0256001	0.0276654	0.0308737	0.033635	0.0508196	0.0402988	0.0394497	0.0436917	0.0488369	0.0404665	0.0392308	0.055923	0.0473396	0.0494908	0.0304878	0.0312384	0.0270207	0.0271397	0.0293242	0.0266012
WAMW0651	Mequinol	Alcohol	C7H8O2	150-76-5	phenol	-	-	-	-	-	-	-	-	-	-	-	-	-	-	-	-	-	-	-	-	-	-	-	-	-	-	-	-	-	-	-	-	-	-	-	-	-
WAMW1474	Butanamide, 3-methyl-	Amine	C5H11NO	541-46-8	-	-	-	-	-	-	-	-	-	-	-	-	-	-	-	-	-	-	-	-	-	-	-	-	-	-	-	-	-	-	-	-	-	-	-	-	-	-
WAMW1516	Mandelic acid, 4-hydroxy-3-methoxy-	Acid	C9H10O5	55-10-7	sweet, vanilla	-	-	-	-	-	-	-	-	-	-	-	-	-	-	-	-	-	-	-	-	-	-	-	-	-	-	-	-	-	-	-	-	-	-	-	-	-
WAMW2089	Formamide, N-cyclohexyl-	Amine	C7H13NO	766-93-8	-	-	-	-	-	-	-	-	-	-	-	-	-	-	-	-	-	-	-	-	-	-	-	-	-	-	-	-	-	-	-	-	-	-	-	-	-	-
WAMW2027	2-Tridecen-1-ol, (E)-	Alcohol	C13H26O	74962-98-4	mild, waxy, clean, watery, cilantro, rue, citrus peel, laundered cloth, fatty	-	-	-	-	-	-	-	-	-	-	-	-	-	-	-	-	-	-	-	-	-	-	-	-	-	-	-	-	-	-	-	-	-	-	-	-	-
WAMW1999	2-Ethylhexyl 2-ethylhexanoate	Ester	C16H32O2	7425-14-1	fruity	-	-	-	-	-	-	-	-	-	-	-	-	-	-	-	-	-	-	-	-	-	-	-	-	-	-	-	-	-	-	-	-	-	-	-	-	-
WAMW1854	Formic acid, pentyl ester	Ester	C6H12O2	638-49-3	ethereal, fruity, unripe banana, green, earthy	-	-	-	-	-	-	-	-	-	-	-	-	-	-	-	-	-	-	-	-	-	-	-	-	-	-	-	-	-	-	-	-	-	-	-	-	-
WAMW1847	Tetrahydrofurfuryl propionate	Ester	C8H14O3	637-65-0	oily, paint, fruity, violet, leafy, tropical	-	-	-	-	-	-	-	-	-	-	-	-	-	-	-	-	-	-	-	-	-	-	-	-	-	-	-	-	-	-	-	-	-	-	-	-	-
WAMW1843	1H-Pyrrole, 2-methyl-	Heterocyclic compound	C5H7N	636-41-9	-	10	0.00142862	0.00159144	0.00137924	0.00136829	0.00137155	0.00140613	0.00133259	0.00124461	0.00135241	0.00145003	0.0014174	0.00135122	0.00133254	0.0014825	0.00128921	0.00126218	0.00142169	0.00124171	0.00140061	0.00137243	0.00122371	0.00124467	0.00119494	0.00144385	0.00129806	0.00131892	0.00122795	0.00119709	0.00118235	0.00122758	0.00110919	0.00126286	0.00131983	0.00118542	0.0012116	0.00113324
WAMW1825	Cetene	Hydrocarbons	C16H32	629-73-2	-	13000	1.83995e-06	2.23504e-06	2.1069e-06	2.47314e-06	2.44585e-06	2.35967e-06	1.93361e-06	2.37745e-06	1.78246e-06	2.06384e-06	2.00553e-06	2.31244e-06	1.86111e-06	1.63456e-06	2.28066e-06	2.2588e-06	2.22454e-06	2.10096e-06	2.27603e-06	2.86375e-06	3.83929e-06	2.88963e-06	2.72923e-06	2.75881e-06	1.86635e-06	2.03077e-06	2.17445e-06	2.29756e-06	2.26175e-06	2.16031e-06	2.52833e-06	2.21928e-06	2.35906e-06	2.64453e-06	2.31671e-06	2.42902e-06
WAMW1792	2-Pentanol, acetate	Ester	C7H14O2	626-38-0	herbal, weedy, musty, green, vegetable, nut skin, beany, ketonic, animalic	0.015	12.1667	13.7798	11.8363	12.0434	12.2066	12.022	11.626	11.2702	11.6908	11.8574	12.488	11.7389	10.7109	11.9972	11.3848	10.7643	11.4741	10.326	11.1613	11.3083	11.5634	12.1746	11.0846	12.2754	10.934	11.5091	10.5648	10.8752	10.7489	11.3374	9.89391	10.841	11.2768	10.1454	10.8427	9.94742
WAMW1788	n-Hexyl salicylate	Ester	C13H18O3	6259-76-3	fresh, herbal, orchid, green	-	-	-	-	-	-	-	-	-	-	-	-	-	-	-	-	-	-	-	-	-	-	-	-	-	-	-	-	-	-	-	-	-	-	-	-	-
WAMW1769	Propanoic acid, pentyl ester	Ester	C8H16O2	624-54-4	sweet, fruity, apricot, pineapple, tropical, banana	0.085	0.249872	0.350528	0.298641	0.323364	0.310856	0.32127	0.247624	0.281684	0.258605	0.254793	0.23884	0.251603	0.249815	0.240862	0.430081	0.367952	0.266665	0.277749	0.283539	0.523373	0.250842	0.264589	0.308501	0.302848	0.209181	0.208071	0.242334	0.218852	0.214813	0.268481	0.266167	0.259163	0.314181	0.255382	0.272277	0.244552
WAMW1724	2-Pyrrolidinone	Heterocyclic compound	C4H7NO	616-45-5	-	440	2.80956e-05	2.54251e-05	2.2025e-05	2.91903e-05	3.31912e-05	3.30948e-05	2.52533e-05	3.14625e-05	2.54886e-05	2.5914e-05	2.21707e-05	2.53592e-05	2.91313e-05	3.17689e-05	3.07607e-05	3.79305e-05	3.86102e-05	3.62575e-05	2.71303e-05	2.90626e-05	3.58642e-05	3.58858e-05	3.53332e-05	3.55188e-05	2.67772e-05	2.80141e-05	3.30898e-05	3.55442e-05	2.68499e-05	3.2351e-05	2.56619e-05	2.4096e-05	1.94512e-05	2.62476e-05	2.37864e-05	2.28251e-05
WAMW1719	3-Pentanethiol	Alcohol	C5H12S	616-31-9	sulfury, gassy, durian, fruity, roasted, savory	-	-	-	-	-	-	-	-	-	-	-	-	-	-	-	-	-	-	-	-	-	-	-	-	-	-	-	-	-	-	-	-	-	-	-	-	-
WAMW1705	Isopropyl phenyl ketone	Ketone	C10H12O	611-70-1	green	-	-	-	-	-	-	-	-	-	-	-	-	-	-	-	-	-	-	-	-	-	-	-	-	-	-	-	-	-	-	-	-	-	-	-	-	-
WAMW1674	Urea, methyl-	Nitrogen compounds	C2H6N2O	598-50-5	-	440	5.66898e-05	6.18259e-05	5.86435e-05	5.90875e-05	6.56476e-05	6.15272e-05	5.7191e-05	6.06666e-05	5.30289e-05	5.18274e-05	5.00838e-05	5.02177e-05	6.01284e-05	6.08355e-05	6.19036e-05	6.28487e-05	6.65926e-05	6.44117e-05	5.15641e-05	4.81127e-05	6.4134e-05	5.92072e-05	5.53958e-05	5.22832e-05	2.72286e-05	3.29758e-05	3.04846e-05	2.9093e-05	3.41928e-05	3.26337e-05	3.91317e-05	3.32381e-05	3.74683e-05	3.65861e-05	3.63389e-05	3.36799e-05
WAMW1665	Cyclohexanone, 2-methyl-5-(1-methylethenyl)-, trans-	Terpenoids	C10H16O	5948-04-9	warm, herbal	-	-	-	-	-	-	-	-	-	-	-	-	-	-	-	-	-	-	-	-	-	-	-	-	-	-	-	-	-	-	-	-	-	-	-	-	-
WAMW1635	Pentanoic acid, butyl ester	Ester	C9H18O2	591-68-4	sweet, fruity, pineapple, green, raspberry, tropical	-	-	-	-	-	-	-	-	-	-	-	-	-	-	-	-	-	-	-	-	-	-	-	-	-	-	-	-	-	-	-	-	-	-	-	-	-
WAMW1594	Caffeine	Heterocyclic compound	C8H10N4O2	58-08-2	-	40	0.00122424	0.00148236	0.00126832	0.00148348	0.00135793	0.00136208	0.0012178	0.0013862	0.00109994	0.00119327	0.00115826	0.00117954	0.00135147	0.00126887	0.00150159	0.00157943	0.00140332	0.00141322	0.00117249	0.00145913	0.00175515	0.00133596	0.00133152	0.00159807	0.00181325	0.00157263	0.00148549	0.00195983	0.00176716	0.00161862	0.00182383	0.00165567	0.00159024	0.00165274	0.00173711	0.00167554
WAMW1576	Octadecanoic acid	Acid	C18H36O2	57-11-4	mild, fatty, waxy	20	0.000143576	0.000187091	0.000154019	0.000134943	0.000201586	0.000170148	0.000213536	0.000206599	0.000190622	0.00020175	0.000171851	0.000155825	0.000151164	0.000136029	0.000200808	0.000150868	0.000144973	0.000190897	0.000169663	0.00018688	0.000279098	0.00012571	0.000181194	0.000214434	0.000298167	0.000174845	0.000238126	0.000359643	0.000323579	0.000258352	0.000204356	0.000219554	0.000164344	0.000233487	0.000223784	0.000212608
WAMW1560	3-Pentanol, 2-methyl-	Alcohol	C6H14O	565-67-3	-	0.42	1.0004	1.01694	1.01081	1.00273	0.960021	1.01295	0.98561	1.03362	0.976629	1.01474	0.988219	0.981813	0.974883	1.02252	0.956409	0.96163	0.954033	0.954634	0.989113	0.993453	1.00108	0.997521	0.991665	1.03323	0.969245	0.990339	0.966893	0.989312	1.01081	0.950004	0.914019	0.948599	0.957902	0.977505	1.00784	0.951527
QWMW0790	5,6-Dihydro-2,4,6-triethyl-4H-1,3,5-dithiazine	Heterocyclic compound	C9H19NS2	54717-17-8	sulfury, fried, onion, leek, meaty, savory, seafood	-	-	-	-	-	-	-	-	-	-	-	-	-	-	-	-	-	-	-	-	-	-	-	-	-	-	-	-	-	-	-	-	-	-	-	-	-
NMW0112	Phenol, 2-(1,1-dimethylethyl)-	Phenol	C10H14O	88-18-6	-	0.05	0.916787	0.933117	0.798146	0.881904	0.799753	0.726361	0.786999	0.627725	0.712797	0.783279	0.80156	0.73231	0.869047	0.831822	1.03769	1.15516	0.794213	0.895671	0.90487	0.842761	1.20329	0.946581	0.723294	0.787947	0.46282	0.451259	0.462737	0.420453	0.458533	0.352217	0.498524	0.6136	0.441252	0.585762	0.59811	0.589721
NMW0247	Furan, 3-(4,8-dimethyl-3,7-nonadienyl)-, (E)-	Terpenoids	C15H22O	23262-34-2	-	-	-	-	-	-	-	-	-	-	-	-	-	-	-	-	-	-	-	-	-	-	-	-	-	-	-	-	-	-	-	-	-	-	-	-	-	-
NMW0269	Benzene, 1,1'-(1,3-propanediyl)bis-	Aromatics	C15H16	1081-75-0	-	-	-	-	-	-	-	-	-	-	-	-	-	-	-	-	-	-	-	-	-	-	-	-	-	-	-	-	-	-	-	-	-	-	-	-	-	-
NMW0263	Gramine	Heterocyclic compound	C11H14N2	87-52-5	-	-	-	-	-	-	-	-	-	-	-	-	-	-	-	-	-	-	-	-	-	-	-	-	-	-	-	-	-	-	-	-	-	-	-	-	-	-
[truncated: 384 more rows]
